# Supplementary material for: Bacterial Communities in the Feces of Laboratory Reared Gampsocleis gratiosa (Orthoptera: Tettigoniidae) across Different Developmental Stages and Sexes
Source: MDPI journal article supplement (doi:10.3390/insects13040361), 2022-04-07
Supplement: s1 [file s1]

Table S3 Nonparametric Kruskal-Wallis tests

|                                                | <b>ACE</b>                                     |   | <b>Chao1</b>                                   |   | <b>Shannon</b>                                  |   | <b>Gini-Simpson</b>                             |
|------------------------------------------------|------------------------------------------------|---|------------------------------------------------|---|-------------------------------------------------|---|-------------------------------------------------|
| Among different developmental stages of male   | chi-squared = 4.5921, df = 3, p-value = 0.2042 | = | chi-squared = 5.6028, df = 3, p-value = 0.1326 | = | chi-squared = 0.26827, df = 3, p-value = 0.9659 | = | chi-squared = 0.27392, df = 3, p-value = 0.9649 |
| Among different developmental stages of female | chi-squared = 3.8443, df = 3, p-value = 0.2788 | = | chi-squared = 4.7754, df = 3, p-value = 0.189  | = | chi-squared = 3.2828, df = 3, p-value = 0.35    | = | chi-squared = 4.3985, df = 3, p-value = 0.2215  |
| Among different developmental stages and sexes | chi-squared = 8.6308, df = 7, p-value = 0.2803 | = | chi-squared = 10.51, df = 7, p-value = 0.1615  | = | chi-squared = 6.8006, df = 7, p-value = 0.4499  | = | chi-squared = 7.1247, df = 7, p-value = 0.416   |
