# Supplementary material for: Bacterial Communities in the Feces of Laboratory Reared Gampsocleis gratiosa (Orthoptera: Tettigoniidae) across Different Developmental Stages and Sexes
Source: MDPI journal article supplement (doi:10.3390/insects13040361), 2022-04-07
Supplement: s1 [file s1]

Table S4 Nonparametric paired t-test between groups

|                | ACE                                          | Chao1                                        | Shannon                                                              | Simpson                                       |
|----------------|----------------------------------------------|----------------------------------------------|----------------------------------------------------------------------|-----------------------------------------------|
| MN12 vs FN12   | t = -0.1821,<br>df = 5,<br>p-value = 0.8627  | t = -0.13469,<br>df = 5,<br>p-value = 0.8981 | <b>t = -3.0588,</b><br><b>df = 5,</b><br><b>p-value = 0.02814</b>    | t = -2.3721,<br>df = 5,<br>p-value = 0.06378  |
| MN35 vs FN35   | t = 1.05,<br>df = 8,<br>p-value = 0.3244     | t = 1.482,<br>df = 8,<br>p-value = 0.1766    | t = 0.13188,<br>df = 8,<br>p-value = 0.8983                          | t = 0.37082,<br>df = 8,<br>p-value = 0.7204   |
| MN67 vs FN67   | t = -2.1948,<br>df = 5,<br>p-value = 0.07962 | t = -2.2254,<br>df = 5,<br>p-value = 0.07661 | t = -0.93133,<br>df = 5,<br>p-value = 0.3944                         | t = -0.19365,<br>df = 5,<br>p-value = 0.8541  |
| MA vs FA       | t = -1.0342,<br>df = 11,<br>p-value = 0.3232 | t = -1.1995,<br>df = 11,<br>p-value = 0.2555 | t = -1.0452,<br>df = 11,<br>p-value = 0.3184                         | t = -0.56459,<br>df = 11,<br>p-value = 0.5837 |
| Male vs Female | t = -1.1689,<br>df = 32,<br>p-value = 0.2511 | t = -1.1965,<br>df = 32,<br>p-value = 0.2403 | <b>t = -23.79,</b><br><b>df = 32,</b><br><b>p-value &lt; 2.2e-16</b> | t = -0.73611,<br>df = 32,<br>p-value = 0.467  |

Note. Nonparametric paired *t*-test only revealed significant differences in the Shannon diversity indices between Male vs. Female ( $P < 2.2e-16$ ) and MN12 vs. FN12 ( $P < 0.05$ ).
