# Supplementary material for: Bacterial Communities in the Feces of Laboratory Reared Gampsocleis gratiosa (Orthoptera: Tettigoniidae) across Different Developmental Stages and Sexes
Source: Insects. 2022 Apr 7;13(4):361. doi: 10.3390/insects13040361 (PMC9024567; doi:10.3390/insects13040361)
Supplement: Supplementary file 1 [file insects-13-00361-s001.zip]

Archive with 4 entries (4 files):
- Table S1. Characteristics of 16S rDNA gene amplicon libraries of bacterial communities in each 66 Gampsocleis gratiosa fecal sample.xlsx
- Table S2 Relative abundance of different bacterial taxa and OTU in each sample.xlsx
- Table S3. Nonparametric Kruskal-Wallis tests among groups.pdf
- Table S4. Nonparametric paired t-test between groups.pdf
