# Supplementary material for: Bacterial Communities in the Feces of Laboratory Reared Gampsocleis gratiosa (Orthoptera: Tettigoniidae) across Different Developmental Stages and Sexes
Source: Insects. 2022 Apr 7;13(4):361. doi: 10.3390/insects13040361 (PMC9024567; doi:10.3390/insects13040361)
Supplement: Supplementary file 1 [file insects-13-00361-s001.zip › Table S1. Characteristics of 16S rDNA gene amplicon libraries of bacterial communities in each 66 Gampsocleis gratiosa fecal sample.xlsx]

## Sheet: Sheet1
Sample ID	Seq_num	Filtered_num	Good’s coverage	OTUs	ACE	Chao1	Shannon	Simpson
MN1-A	231151	225689	0.9988	481	799.24	755.221	1.623	0.723
MN1-B	221356	224273	0.9992	367	541.156	527.22	1.189	0.552
MN1-C	223115	173957	0.9989	467	693.615	673.203	1.388	0.562
MN2-A	225761	222122	0.9992	351	505.585	540.222	1.23	0.617
MN2-B	230841	224715	0.9987	547	856.537	871.364	1.782	0.751
MN2-C	225046	231787	0.9987	641	939.104	897.818	2.195	0.796
MN3-A	221869	239582	0.9989	473	728.973	686.37	1.914	0.752
MN3-B	228386	227175	0.9992	491	624.073	653.559	1.443	0.625
MN3-C	226286	219643	0.999	531	715.749	732.397	1.933	0.77
MN4-A	224812	209068	0.9992	421	584.276	583.167	1.273	0.61
MN4-B	219612	208637	0.9988	480	807.22	733.271	1.828	0.722
MN4-C	240902	215234	0.9988	446	807.564	756.515	1.517	0.628
MN5-A	226203	217362	0.999	399	630.505	595.087	1.222	0.522
MN5-B	226526	226009	0.9989	425	710.132	690.661	1.672	0.632
MN5-C	237727	212365	0.9989	468	740.893	711.143	1.613	0.668
MN6-A	234294	224694	0.9991	325	590.834	595.419	1.006	0.376
MN6-B	231889	226312	0.9991	354	593.667	605.667	1.887	0.78
MN6-C	215254	232497	0.9988	542	820.527	805.649	2.078	0.825
MN7-A	243552	209022	0.999	380	650.199	617.763	1.279	0.521
MN7-B	236588	221755	0.999	422	669.686	643	1.737	0.7
MN7-C	208447	217466	0.999	357	664.359	687.341	1.416	0.664
MA1-A	229186	218236	0.9991	353	544.15	573.521	1.637	0.732
MA1-B	212948	219771	0.9992	284	567.414	546.583	1.636	0.721
MA1-C	209133	209600	0.9989	375	713.821	681.365	1.814	0.765
MA2-A	224651	224290	0.9989	488	746.343	717.2	2.136	0.809
MA2-B	226996	239038	0.999	378	709.75	621.902	1.555	0.649
MA2-C	236862	234036	0.9992	300	497.36	463.286	1.392	0.612
MA3-A	215299	204736	0.9994	232	410.792	356.385	1.076	0.549
MA3-A	224375	204410	0.9989	747	937.425	1004.36	2.03	0.69
MA3-A	222964	202846	0.9995	203	337.213	308.636	1.131	0.59
MA4-A	210556	230704	0.999	431	692.411	662.554	1.809	0.684
MA4-A	227239	216359	0.9993	296	509.711	492.875	1.535	0.647
MA4-A	225878	218461	0.9995	179	324.306	355.647	1.685	0.746
FN1-A	238994	221612	0.9986	558	875.821	828.011	2.041	0.809
FN1-B	214064	206406	0.9991	515	690.073	699.078	2.021	0.776
FN1-C	231216	217217	0.9995	352	429.688	429.938	1.679	0.744
FN2-A	212891	213429	0.9988	507	782.844	716.848	1.499	0.601
FN2-B	216524	206026	0.9989	552	790.692	745.011	2.184	0.837
FN2-C	222306	217170	0.9988	588	851.983	901.5	2.139	0.793
FN3-A	221365	217641	0.999	439	692.078	649.959	1.651	0.738
FN3-B	209800	224725	0.9991	441	656.376	600	2.135	0.8
FN3-C	229917	206989	0.999	463	664.031	636.462	1.426	0.588
FN4-A	217207	211603	0.9989	403	737.228	684.304	1.49	0.624
FN4-B	221601	211649	0.9995	267	356.928	344.027	0.645	0.182
FN4-C	233541	205962	0.9988	480	758.677	721.325	1.804	0.71
FN5-A	207661	210315	0.9991	436	629.658	603.48	1.563	0.588
FN5-B	233822	207461	0.9989	416	719.515	695.491	1.935	0.765
FN5-C	231011	218737	0.9991	430	612.711	603.25	1.544	0.692
FN6-A	220778	216575	0.9991	383	603.415	597.2	1.653	0.709
FN6-B	235326	229275	0.9985	707	1006.41	946.167	2.076	0.765
FN6-C	246936	230160	0.9986	865	1070.93	1086.3	2.009	0.717
FN7-A	225673	216884	0.9989	431	687.702	668.776	1.501	0.696
FN7-B	234850	207295	0.9988	629	921.945	871.284	2.034	0.755
FN7-C	240512	215522	0.9994	537	637.103	650.42	0.97	0.333
FA1-A	233999	219154	0.9988	468	764.815	790.967	1.981	0.812
FA1-B	227348	230199	0.9991	367	629.73	633.217	1.869	0.769
FA1-C	229347	205602	0.9988	608	828.144	821.83	1.163	0.418
FA2-A	209267	228026	0.9993	318	477.863	461.887	1.399	0.587
FA2-B	216516	230937	0.9991	337	635.349	586.918	1.468	0.666
FA2-C	234009	223205	0.9988	682	876.434	855.513	1.726	0.68
FA3-A	217639	236694	0.999	398	679.563	648.556	2.166	0.828
FA3-B	221295	238207	0.9991	419	601.279	606.548	1.703	0.731
FA3-C	245208	226031	0.9987	778	1010.71	974.062	2.395	0.827
FA4-A	224633	228212	0.9993	329	503.576	606.889	2.354	0.856
FA4-B	226668	241684	0.9992	361	563.521	515.694	2.154	0.821
FA4-C	229855	228104	0.9994	297	439.295	457.5	1.37	0.571
