# Supplementary material for: Bacterial Communities in the Feces of Laboratory Reared Gampsocleis gratiosa (Orthoptera: Tettigoniidae) across Different Developmental Stages and Sexes
Source: Insects. 2022 Apr 7;13(4):361. doi: 10.3390/insects13040361 (PMC9024567; doi:10.3390/insects13040361)
Supplement: Supplementary file 1 [file insects-13-00361-s001.zip › Table S2 Relative abundance of different bacterial taxa and OTU in each sample.xlsx]

## Sheet: Sheet1
	Male nymph																					Male adult												Female nymph
	1st instar male nymphs, MN1			2nd instar male nymphs, MN2			3rd instar male nymphs, MN3			4th instar male nymphs, MN4			5th instar male nymphs, MN5			6th instar male nymphs, MN6			7th instar male nymphs, MN7			0 day male adult, MA1			7 day male adult, MA2			14 day male adult, MA3			21 day male adult, MA4			1st instar female nymphs, FN1			2nd instar female nymphs, FN2			3rd instar female nymphs, FN3			4th instar female nymphs, FN4			5th instar female nymphs, FN5			6th instar female nymphs, FN6
	MN1-A	MN1-B	MN1-C	MN2-A	MN2-B	MN2-C	MN3-A	MN3-B	MN3-C	MN4-A	MN4-B	MN4-C	MN5-A	MN5-B	MN5-C	MN6-A	MN6-B	MN6-C	MN7-A	MN7-B	MN7-C	MA1-A	MA1-B	MA1-C	MA2-A	MA2-B	MA2-C	MA3-A	MA3-B	MA3-C	MA4-A	MA4-B	MA4-C	FN1-A	FN1-B	FN1-C	FN2-A	FN2-B	FN2-C	FN3-A	FN3-B	FN3-C	FN4-A	FN4-B	FN4-C	FN5-A	FN5-B	FN5-C	FN6-A
Taxnomic taxa	求和项:MN1-A	求和项:MN1-B	求和项:MN1-C	求和项:MN2-A	求和项:MN2-B	求和项:MN2-C	求和项:MN3-A	求和项:MN3-B	求和项:MN3-C	求和项:MN4-A	求和项:MN4-B	求和项:MN4-C	求和项:MN5-A	求和项:MN5-B	求和项:MN5-C	求和项:MN6-A	求和项:MN6-B	求和项:MN6-C	求和项:MN7-A	求和项:MN7-B	求和项:MN7-C	求和项:MA1-A	求和项:MA1-B	求和项:MA1-C	求和项:MA2-A	求和项:MA2-B	求和项:MA2-C	求和项:MA3-A	求和项:MA3-B	求和项:MA3-C	求和项:MA4-A	求和项:MA4-B	求和项:MA4-C	求和项:FN1-A	求和项:FN1-B	求和项:FN1-C	求和项:FN2-A	求和项:FN2-B	求和项:FN2-C	求和项:FN3-A	求和项:FN3-B	求和项:FN3-C	求和项:FN4-A	求和项:FN4-B	求和项:FN4-C	求和项:FN5-A	求和项:FN5-B	求和项:FN5-C	求和项:FN6-A
Acidobacteria	0	0	0	1.39222e-05	1.43863e-05	1.49441e-05	1.19044e-05	0.000134051	4.66342e-05	0	5.37495e-05	4.3351e-06	4.62366e-06	0	0	0	4.61072e-06	0	4.333e-06	4.45012e-06	5.05094e-06	4.5788e-06	4.93029e-06	0	4.73303e-06	9.34693e-06	0	0	0.00214656	0	3.97233e-05	1.91234e-05	4.74172e-06	9.4714e-06	1.52575e-05	2.2739e-05	1.51586e-05	0	1.01379e-05	4.77952e-06	4.99775e-06	3.66031e-05	0	6.64219e-05	2.69015e-05	5.02828e-06	0	9.32114e-06	4.74989e-06
Actinobacteria	0.000384439	6.2929e-05	3.8129e-05	6.49703e-05	0.000287726	0.000229143	1.19044e-05	0.000526961	5.12976e-05	5.67738e-05	0.000107499	5.20212e-05	0.000147957	4.16187e-05	0	4.00912e-05	0	0	2.1665e-05	1.33504e-05	0	2.2894e-05	1.97211e-05	1.02203e-05	1.89321e-05	7.47754e-05	2.23926e-05	4.45785e-05	0.000525486	1.44432e-05	0.000104274	0.000349002	9.48344e-06	0.000142071	0.000437383	0.00016372	2.02114e-05	0.000267965	1.52068e-05	5.73542e-05	3.49843e-05	0.000132686	2.42311e-05	0.000346343	3.13851e-05	7.0396e-05	4.79614e-06	3.2624e-05	1.42497e-05
Armatimonadetes	0	0	0	0	0	0	0	0	4.66342e-06	0	0	0	0	0	0	0	0	0	0	0	0	0	0	0	0	0	0	0	1.98297e-05	0	0	0	0	0	0	0	0	0	5.06894e-06	0	0	0	0	0	0	0	0	0	0
Bacteroidetes	0.00012969	5.80883e-05	6.19596e-05	0.000269163	0.000258953	0.000114572	0.000172614	0.00178427	0.000242498	0.000241289	0.000214998	9.10372e-05	0.000286667	0.000138729	0.000159203	0.00021382	0.000110657	5.0804e-06	9.5326e-05	7.12019e-05	3.03056e-05	0.000183152	1.97211e-05	3.06609e-05	2.36652e-05	0.000140204	3.58282e-05	0.000104017	0.00811529	8.18449e-05	0.00035751	8.12744e-05	8.53509e-05	8.05069e-05	0.00331597	0.000509353	0.000116216	7.44347e-05	0.000202758	0.000133827	0.000129942	0.000640553	9.20784e-05	0.000279921	7.62209e-05	0.000105594	3.83691e-05	0.000223707	0.000104498
candidate division WPS-1	0	0	0	0	0	0	0	0	2.33171e-05	0	4.88632e-06	0	0	0	0	0	0	0	0	0	0	0	0	0	0	0	0	0	2.47871e-05	0	0	0	0	0	0	0	0	0	0	0	0	0	0	4.26998e-05	8.96716e-06	0	0	0	0
Chlamydiae	0	0	0	0	0	0	0	7.85818e-05	0	0	0	0	0	0	0	0	0	0	0	0	0	0	0	0	0	0	0	0	0	0	0	0	0	0	0	0	0	0	0	0	0	0	0	9.48884e-06	0	0	0	0	0
Chlorobi	0	0	0	0	0	0	0	7.39594e-05	0	0	0	0	0	0	0	0	0	0	0	0	0	0	0	0	0	0	0	0	0	0	4.96542e-06	0	0	0	0	0	0	0	0	4.77952e-06	0	0	0	0	0	0	0	0	0
Chloroflexi	1.38954e-05	0	0	0	0	1.49441e-05	0	9.24492e-06	1.39903e-05	0.000160859	1.95453e-05	4.3351e-06	0	4.6243e-06	0	0	0	0	4.333e-06	0	0	0	0	5.11015e-06	0	0	0	0	0.000510614	0	4.96542e-06	4.78085e-06	0	0	0	0	0	4.96231e-06	5.57583e-05	0	0	6.86307e-05	0	9.48884e-06	0	0	0	1.86423e-05	0
Anaerolineae	1.38954e-05	0	0	0	0	1.49441e-05	0	9.24492e-06	1.39903e-05	0.000160859	1.95453e-05	4.3351e-06	0	4.6243e-06	0	0	0	0	4.333e-06	0	0	0	0	5.11015e-06	0	0	0	0	0.000510614	0	4.96542e-06	4.78085e-06	0	0	0	0	0	4.96231e-06	5.57583e-05	0	0	6.86307e-05	0	9.48884e-06	0	0	0	1.86423e-05	0
Anaerolineales	1.38954e-05	0	0	0	0	1.49441e-05	0	9.24492e-06	1.39903e-05	0.000160859	1.95453e-05	4.3351e-06	0	4.6243e-06	0	0	0	0	4.333e-06	0	0	0	0	5.11015e-06	0	0	0	0	0.000510614	0	4.96542e-06	4.78085e-06	0	0	0	0	0	4.96231e-06	5.57583e-05	0	0	6.86307e-05	0	9.48884e-06	0	0	0	1.86423e-05	0
Anaerolineaceae	1.38954e-05	0	0	0	0	1.49441e-05	0	9.24492e-06	1.39903e-05	0.000160859	1.95453e-05	4.3351e-06	0	4.6243e-06	0	0	0	0	4.333e-06	0	0	0	0	5.11015e-06	0	0	0	0	0.000510614	0	4.96542e-06	4.78085e-06	0	0	0	0	0	4.96231e-06	5.57583e-05	0	0	6.86307e-05	0	9.48884e-06	0	0	0	1.86423e-05	0
Bellilinea	0	0	0	0	0	0	0	0	0	0	0	0	0	0	0	0	0	0	0	0	0	0	0	0	0	0	0	0	6.44464e-05	0	0	4.78085e-06	0	0	0	0	0	0	0	0	0	0	0	0	0	0	0	0	0
Otu11123	0	0	0	0	0	0	0	0	0	0	0	0	0	0	0	0	0	0	0	0	0	0	0	0	0	0	0	0	6.44464e-05	0	0	4.78085e-06	0	0	0	0	0	0	0	0	0	0	0	0	0	0	0	0	0
Otu530768	0	0	0	0	0	0	0	0	0	0	0	0	0	0	0	0	0	0	0	0	0	0	0	0	0	0	0	0	0	0	0	0	0	0	0	0	0	0	0	0	0	0	0	0	0	0	0	0	0
Levilinea	0	0	0	0	0	0	0	0	0	6.62361e-05	0	0	0	0	0	0	0	0	4.333e-06	0	0	0	0	0	0	0	0	0	1.98297e-05	0	0	0	0	0	0	0	0	0	0	0	0	0	0	0	0	0	0	1.86423e-05	0
Otu347319	0	0	0	0	0	0	0	0	0	6.62361e-05	0	0	0	0	0	0	0	0	4.333e-06	0	0	0	0	0	0	0	0	0	1.98297e-05	0	0	0	0	0	0	0	0	0	0	0	0	0	0	0	0	0	0	1.86423e-05	0
Ornatilinea	0	0	0	0	0	0	0	0	0	8.98919e-05	0	0	0	0	0	0	0	0	0	0	0	0	0	0	0	0	0	0	0	0	0	0	0	0	0	0	0	0	0	0	0	0	0	0	0	0	0	0	0
Otu530757	0	0	0	0	0	0	0	0	0	8.98919e-05	0	0	0	0	0	0	0	0	0	0	0	0	0	0	0	0	0	0	0	0	0	0	0	0	0	0	0	0	0	0	0	0	0	0	0	0	0	0	0
unclassified	1.38954e-05	0	0	0	0	1.49441e-05	0	9.24492e-06	1.39903e-05	4.73115e-06	1.95453e-05	4.3351e-06	0	4.6243e-06	0	0	0	0	0	0	0	0	0	5.11015e-06	0	0	0	0	0.000426338	0	4.96542e-06	0	0	0	0	0	0	4.96231e-06	5.57583e-05	0	0	6.86307e-05	0	9.48884e-06	0	0	0	0	0
Otu331526	4.6318e-06	0	0	0	0	0	0	0	0	0	0	0	0	0	0	0	0	0	0	0	0	0	0	0	0	0	0	0	0	0	0	0	0	0	0	0	0	4.96231e-06	4.05515e-05	0	0	0	0	0	0	0	0	0	0
Otu332700	4.6318e-06	0	0	0	0	0	0	0	0	0	0	4.3351e-06	0	0	0	0	0	0	0	0	0	0	0	0	0	0	0	0	4.95742e-06	0	0	0	0	0	0	0	0	0	0	0	0	0	0	0	0	0	0	0	0
Otu337606	0	0	0	0	0	4.98137e-06	0	0	1.39903e-05	0	4.88632e-06	0	0	4.6243e-06	0	0	0	0	0	0	0	0	0	5.11015e-06	0	0	0	0	3.96593e-05	0	4.96542e-06	0	0	0	0	0	0	0	0	0	0	1.37261e-05	0	4.74442e-06	0	0	0	0	0
Otu337607	0	0	0	0	0	9.96274e-06	0	4.62246e-06	0	0	0	0	0	0	0	0	0	0	0	0	0	0	0	0	0	0	0	0	0.000148722	0	0	0	0	0	0	0	0	0	0	0	0	0	0	0	0	0	0	0	0
Otu337615	0	0	0	0	0	0	0	0	0	0	0	0	0	0	0	0	0	0	0	0	0	0	0	0	0	0	0	0	6.44464e-05	0	0	0	0	0	0	0	0	0	0	0	0	0	0	0	0	0	0	0	0
Otu337622	0	0	0	0	0	0	0	0	0	0	4.88632e-06	0	0	0	0	0	0	0	0	0	0	0	0	0	0	0	0	0	2.47871e-05	0	0	0	0	0	0	0	0	0	0	0	0	3.20277e-05	0	0	0	0	0	0	0
Otu337624	0	0	0	0	0	0	0	4.62246e-06	0	0	4.88632e-06	0	0	0	0	0	0	0	0	0	0	0	0	0	0	0	0	0	5.9489e-05	0	0	0	0	0	0	0	0	0	0	0	0	0	0	0	0	0	0	0	0
Otu337677	0	0	0	0	0	0	0	0	0	0	0	0	0	0	0	0	0	0	0	0	0	0	0	0	0	0	0	0	5.9489e-05	0	0	0	0	0	0	0	0	0	0	0	0	2.28769e-05	0	0	0	0	0	0	0
Otu338845	4.6318e-06	0	0	0	0	0	0	0	0	0	4.88632e-06	0	0	0	0	0	0	0	0	0	0	0	0	0	0	0	0	0	1.48722e-05	0	0	0	0	0	0	0	0	0	5.06894e-06	0	0	0	0	0	0	0	0	0	0
Otu343581	0	0	0	0	0	0	0	0	0	0	0	0	0	0	0	0	0	0	0	0	0	0	0	0	0	0	0	0	0	0	0	0	0	0	0	0	0	0	0	0	0	0	0	0	0	0	0	0	0
Otu352555	0	0	0	0	0	0	0	0	0	4.73115e-06	0	0	0	0	0	0	0	0	0	0	0	0	0	0	0	0	0	0	0	0	0	0	0	0	0	0	0	0	0	0	0	0	0	4.74442e-06	0	0	0	0	0
Otu530739	0	0	0	0	0	0	0	0	0	0	0	0	0	0	0	0	0	0	0	0	0	0	0	0	0	0	0	0	9.91483e-06	0	0	0	0	0	0	0	0	0	1.01379e-05	0	0	0	0	0	0	0	0	0	0
Otu530744	0	0	0	0	0	0	0	0	0	0	0	0	0	0	0	0	0	0	0	0	0	0	0	0	0	0	0	0	0	0	0	0	0	0	0	0	0	0	0	0	0	0	0	0	0	0	0	0	0
Otu95471	0	0	0	0	0	0	0	0	0	0	0	0	0	0	0	0	0	0	0	0	0	0	0	0	0	0	0	0	0	0	0	0	0	0	0	0	0	0	0	0	0	0	0	0	0	0	0	0	0
Caldilineae	0	0	0	0	0	0	0	0	0	0	0	0	0	0	0	0	0	0	0	0	0	0	0	0	0	0	0	0	0	0	0	0	0	0	0	0	0	0	0	0	0	0	0	0	0	0	0	0	0
Caldilineales	0	0	0	0	0	0	0	0	0	0	0	0	0	0	0	0	0	0	0	0	0	0	0	0	0	0	0	0	0	0	0	0	0	0	0	0	0	0	0	0	0	0	0	0	0	0	0	0	0
Caldilineaceae	0	0	0	0	0	0	0	0	0	0	0	0	0	0	0	0	0	0	0	0	0	0	0	0	0	0	0	0	0	0	0	0	0	0	0	0	0	0	0	0	0	0	0	0	0	0	0	0	0
Litorilinea	0	0	0	0	0	0	0	0	0	0	0	0	0	0	0	0	0	0	0	0	0	0	0	0	0	0	0	0	0	0	0	0	0	0	0	0	0	0	0	0	0	0	0	0	0	0	0	0	0
Otu337653	0	0	0	0	0	0	0	0	0	0	0	0	0	0	0	0	0	0	0	0	0	0	0	0	0	0	0	0	0	0	0	0	0	0	0	0	0	0	0	0	0	0	0	0	0	0	0	0	0
Cloacimonetes	0	0	0	0	0	0	0	0	0	0	0	0	0	0	0	0	0	0	0	0	0	0	0	0	0	0	0	0	7.93187e-05	0	0	0	0	0	0	0	0	0	0	0	0	0	0	0	0	0	0	0	0
NA	0	0	0	0	0	0	0	0	0	0	0	0	0	0	0	0	0	0	0	0	0	0	0	0	0	0	0	0	7.93187e-05	0	0	0	0	0	0	0	0	0	0	0	0	0	0	0	0	0	0	0	0
NA	0	0	0	0	0	0	0	0	0	0	0	0	0	0	0	0	0	0	0	0	0	0	0	0	0	0	0	0	7.93187e-05	0	0	0	0	0	0	0	0	0	0	0	0	0	0	0	0	0	0	0	0
NA	0	0	0	0	0	0	0	0	0	0	0	0	0	0	0	0	0	0	0	0	0	0	0	0	0	0	0	0	7.93187e-05	0	0	0	0	0	0	0	0	0	0	0	0	0	0	0	0	0	0	0	0
Crenarchaeota	0	0	0	1.85629e-05	4.79543e-06	0	0	4.62246e-06	0	0	0	0	0	0	0	0	0	0	0	0	0	0	0	0	0	0	0	0	0.000550273	0	0	9.56169e-06	0	0	0	0	0	0	0	0	0	1.83015e-05	0	4.74442e-06	0	0	0	0	0
Thermoprotei	0	0	0	1.85629e-05	4.79543e-06	0	0	4.62246e-06	0	0	0	0	0	0	0	0	0	0	0	0	0	0	0	0	0	0	0	0	0.000550273	0	0	9.56169e-06	0	0	0	0	0	0	0	0	0	1.83015e-05	0	4.74442e-06	0	0	0	0	0
unclassified	0	0	0	1.85629e-05	4.79543e-06	0	0	4.62246e-06	0	0	0	0	0	0	0	0	0	0	0	0	0	0	0	0	0	0	0	0	0.000550273	0	0	9.56169e-06	0	0	0	0	0	0	0	0	0	1.83015e-05	0	4.74442e-06	0	0	0	0	0
unclassified	0	0	0	1.85629e-05	4.79543e-06	0	0	4.62246e-06	0	0	0	0	0	0	0	0	0	0	0	0	0	0	0	0	0	0	0	0	0.000550273	0	0	9.56169e-06	0	0	0	0	0	0	0	0	0	1.83015e-05	0	4.74442e-06	0	0	0	0	0
unclassified	0	0	0	1.85629e-05	4.79543e-06	0	0	4.62246e-06	0	0	0	0	0	0	0	0	0	0	0	0	0	0	0	0	0	0	0	0	0.000550273	0	0	9.56169e-06	0	0	0	0	0	0	0	0	0	1.83015e-05	0	4.74442e-06	0	0	0	0	0
Otu416410	0	0	0	1.85629e-05	4.79543e-06	0	0	0	0	0	0	0	0	0	0	0	0	0	0	0	0	0	0	0	0	0	0	0	0.000485827	0	0	9.56169e-06	0	0	0	0	0	0	0	0	0	1.83015e-05	0	0	0	0	0	0	0
Otu416469	0	0	0	0	0	0	0	4.62246e-06	0	0	0	0	0	0	0	0	0	0	0	0	0	0	0	0	0	0	0	0	6.44464e-05	0	0	0	0	0	0	0	0	0	0	0	0	0	0	4.74442e-06	0	0	0	0	0
Deinococcus-Thermus	0	0	0	0	0	0	0	0	8.86049e-05	0	0	0	0	0	0	0	0	0	0	0	0	0	0	0	0	0	0	0	0	4.8144e-06	0	0	0	0	0	0	0	0	0	0	0	1.37261e-05	0	0	0	0	0	4.66057e-06	0
Deinococci	0	0	0	0	0	0	0	0	8.86049e-05	0	0	0	0	0	0	0	0	0	0	0	0	0	0	0	0	0	0	0	0	4.8144e-06	0	0	0	0	0	0	0	0	0	0	0	1.37261e-05	0	0	0	0	0	4.66057e-06	0
Thermales	0	0	0	0	0	0	0	0	8.86049e-05	0	0	0	0	0	0	0	0	0	0	0	0	0	0	0	0	0	0	0	0	4.8144e-06	0	0	0	0	0	0	0	0	0	0	0	1.37261e-05	0	0	0	0	0	4.66057e-06	0
Thermaceae	0	0	0	0	0	0	0	0	8.86049e-05	0	0	0	0	0	0	0	0	0	0	0	0	0	0	0	0	0	0	0	0	4.8144e-06	0	0	0	0	0	0	0	0	0	0	0	1.37261e-05	0	0	0	0	0	4.66057e-06	0
Thermus	0	0	0	0	0	0	0	0	8.86049e-05	0	0	0	0	0	0	0	0	0	0	0	0	0	0	0	0	0	0	0	0	4.8144e-06	0	0	0	0	0	0	0	0	0	0	0	1.37261e-05	0	0	0	0	0	4.66057e-06	0
Otu232583	0	0	0	0	0	0	0	0	8.86049e-05	0	0	0	0	0	0	0	0	0	0	0	0	0	0	0	0	0	0	0	0	4.8144e-06	0	0	0	0	0	0	0	0	0	0	0	1.37261e-05	0	0	0	0	0	4.66057e-06	0
Euryarchaeota	4.6318e-06	2.42035e-05	0	5.10481e-05	4.79543e-06	2.98882e-05	5.9522e-06	6.47144e-05	0	3.31181e-05	4.88632e-06	0	0	0	4.42229e-06	4.45458e-06	0	0	1.2999e-05	0	0	6.86819e-05	0	0	0	0	0	0	0.00985534	0	8.93775e-05	8.60552e-05	4.74172e-06	0	5.08585e-06	1.81912e-05	0	0	0.000329481	9.55904e-06	1.49933e-05	4.57538e-06	0	3.32109e-05	0	5.02828e-06	4.79614e-06	1.39817e-05	0
Methanobacteria	0	4.84069e-06	0	4.64074e-06	4.79543e-06	4.98137e-06	0	9.24492e-06	0	0	4.88632e-06	0	0	0	0	0	0	0	0	0	0	0	0	0	0	0	0	0	0.000961739	0	1.98617e-05	2.39042e-05	0	0	5.08585e-06	4.54779e-06	0	0	0.000217964	0	4.99775e-06	0	0	4.74442e-06	0	0	4.79614e-06	0	0
Methanobacteriales	0	4.84069e-06	0	4.64074e-06	4.79543e-06	4.98137e-06	0	9.24492e-06	0	0	4.88632e-06	0	0	0	0	0	0	0	0	0	0	0	0	0	0	0	0	0	0.000961739	0	1.98617e-05	2.39042e-05	0	0	5.08585e-06	4.54779e-06	0	0	0.000217964	0	4.99775e-06	0	0	4.74442e-06	0	0	4.79614e-06	0	0
Methanobacteriaceae	0	4.84069e-06	0	4.64074e-06	4.79543e-06	4.98137e-06	0	9.24492e-06	0	0	4.88632e-06	0	0	0	0	0	0	0	0	0	0	0	0	0	0	0	0	0	0.000961739	0	1.98617e-05	2.39042e-05	0	0	5.08585e-06	4.54779e-06	0	0	0.000217964	0	4.99775e-06	0	0	4.74442e-06	0	0	4.79614e-06	0	0
Methanobacterium	0	4.84069e-06	0	0	0	0	0	0	0	0	4.88632e-06	0	0	0	0	0	0	0	0	0	0	0	0	0	0	0	0	0	0.000580018	0	4.96542e-06	2.39042e-05	0	0	0	4.54779e-06	0	0	1.01379e-05	0	0	0	0	0	0	0	0	0	0
Otu399394	0	0	0	0	0	0	0	0	0	0	0	0	0	0	0	0	0	0	0	0	0	0	0	0	0	0	0	0	0.000104106	0	0	2.39042e-05	0	0	0	4.54779e-06	0	0	1.01379e-05	0	0	0	0	0	0	0	0	0	0
Otu408512	0	4.84069e-06	0	0	0	0	0	0	0	0	4.88632e-06	0	0	0	0	0	0	0	0	0	0	0	0	0	0	0	0	0	0.000297445	0	4.96542e-06	0	0	0	0	0	0	0	0	0	0	0	0	0	0	0	0	0	0
Otu408513	0	0	0	0	0	0	0	0	0	0	0	0	0	0	0	0	0	0	0	0	0	0	0	0	0	0	0	0	0.000178467	0	0	0	0	0	0	0	0	0	0	0	0	0	0	0	0	0	0	0	0
Methanobrevibacter	0	0	0	0	4.79543e-06	0	0	0	0	0	0	0	0	0	0	0	0	0	0	0	0	0	0	0	0	0	0	0	4.95742e-05	0	9.93083e-06	0	0	0	0	0	0	0	3.04136e-05	0	0	0	0	0	0	0	0	0	0
Otu408511	0	0	0	0	4.79543e-06	0	0	0	0	0	0	0	0	0	0	0	0	0	0	0	0	0	0	0	0	0	0	0	4.95742e-05	0	9.93083e-06	0	0	0	0	0	0	0	3.04136e-05	0	0	0	0	0	0	0	0	0	0
Otu408558	0	0	0	0	0	0	0	0	0	0	0	0	0	0	0	0	0	0	0	0	0	0	0	0	0	0	0	0	0	0	0	0	0	0	0	0	0	0	0	0	0	0	0	0	0	0	0	0	0
Methanosphaera	0	0	0	4.64074e-06	0	4.98137e-06	0	9.24492e-06	0	0	0	0	0	0	0	0	0	0	0	0	0	0	0	0	0	0	0	0	0.000332147	0	4.96542e-06	0	0	0	5.08585e-06	0	0	0	0.000177413	0	4.99775e-06	0	0	4.74442e-06	0	0	4.79614e-06	0	0
Otu405364	0	0	0	4.64074e-06	0	4.98137e-06	0	9.24492e-06	0	0	0	0	0	0	0	0	0	0	0	0	0	0	0	0	0	0	0	0	0.000332147	0	4.96542e-06	0	0	0	5.08585e-06	0	0	0	0.000177413	0	4.99775e-06	0	0	4.74442e-06	0	0	4.79614e-06	0	0
Otu408519	0	0	0	0	0	0	0	0	0	0	0	0	0	0	0	0	0	0	0	0	0	0	0	0	0	0	0	0	0	0	0	0	0	0	0	0	0	0	0	0	0	0	0	0	0	0	0	0	0
Methanomicrobia	0	1.93628e-05	0	4.64074e-05	0	2.49068e-05	5.9522e-06	5.54695e-05	0	3.31181e-05	0	0	0	0	4.42229e-06	4.45458e-06	0	0	1.2999e-05	0	0	6.86819e-05	0	0	0	0	0	0	0.00824914	0	5.46196e-05	5.73702e-05	4.74172e-06	0	0	1.36434e-05	0	0	0.000101379	4.77952e-06	9.9955e-06	4.57538e-06	0	2.84665e-05	0	5.02828e-06	0	1.39817e-05	0
Methanomicrobiales	0	0	0	0	0	0	0	2.31123e-05	0	2.83869e-05	0	0	0	0	0	0	0	0	0	0	0	5.03668e-05	0	0	0	0	0	0	0.000832846	0	0	4.78085e-06	0	0	0	0	0	0	5.06894e-06	0	4.99775e-06	0	0	0	0	0	0	0	0
Methanomicrobiaceae	0	0	0	0	0	0	0	2.31123e-05	0	2.83869e-05	0	0	0	0	0	0	0	0	0	0	0	5.03668e-05	0	0	0	0	0	0	6.44464e-05	0	0	4.78085e-06	0	0	0	0	0	0	5.06894e-06	0	0	0	0	0	0	0	0	0	0
Methanoculleus	0	0	0	0	0	0	0	2.31123e-05	0	2.83869e-05	0	0	0	0	0	0	0	0	0	0	0	5.03668e-05	0	0	0	0	0	0	6.44464e-05	0	0	4.78085e-06	0	0	0	0	0	0	5.06894e-06	0	0	0	0	0	0	0	0	0	0
Otu412477	0	0	0	0	0	0	0	2.31123e-05	0	2.83869e-05	0	0	0	0	0	0	0	0	0	0	0	5.03668e-05	0	0	0	0	0	0	6.44464e-05	0	0	4.78085e-06	0	0	0	0	0	0	0	0	0	0	0	0	0	0	0	0	0
Otu422831	0	0	0	0	0	0	0	0	0	0	0	0	0	0	0	0	0	0	0	0	0	0	0	0	0	0	0	0	0	0	0	0	0	0	0	0	0	0	5.06894e-06	0	0	0	0	0	0	0	0	0	0
Methanospirillaceae	0	0	0	0	0	0	0	0	0	0	0	0	0	0	0	0	0	0	0	0	0	0	0	0	0	0	0	0	0.000768399	0	0	0	0	0	0	0	0	0	0	0	4.99775e-06	0	0	0	0	0	0	0	0
Methanospirillum	0	0	0	0	0	0	0	0	0	0	0	0	0	0	0	0	0	0	0	0	0	0	0	0	0	0	0	0	0.000768399	0	0	0	0	0	0	0	0	0	0	0	4.99775e-06	0	0	0	0	0	0	0	0
Otu422818	0	0	0	0	0	0	0	0	0	0	0	0	0	0	0	0	0	0	0	0	0	0	0	0	0	0	0	0	0.000619677	0	0	0	0	0	0	0	0	0	0	0	0	0	0	0	0	0	0	0	0
Otu422819	0	0	0	0	0	0	0	0	0	0	0	0	0	0	0	0	0	0	0	0	0	0	0	0	0	0	0	0	0.000128893	0	0	0	0	0	0	0	0	0	0	0	4.99775e-06	0	0	0	0	0	0	0	0
Otu422830	0	0	0	0	0	0	0	0	0	0	0	0	0	0	0	0	0	0	0	0	0	0	0	0	0	0	0	0	1.98297e-05	0	0	0	0	0	0	0	0	0	0	0	0	0	0	0	0	0	0	0	0
Methanosarcinales	0	1.93628e-05	0	4.64074e-05	0	2.49068e-05	5.9522e-06	3.23572e-05	0	4.73115e-06	0	0	0	0	4.42229e-06	4.45458e-06	0	0	1.2999e-05	0	0	1.83152e-05	0	0	0	0	0	0	0.00741629	0	5.46196e-05	5.25893e-05	4.74172e-06	0	0	1.36434e-05	0	0	9.63098e-05	4.77952e-06	4.99775e-06	4.57538e-06	0	2.84665e-05	0	5.02828e-06	0	1.39817e-05	0
Methanosarcinaceae	0	1.45221e-05	0	2.32037e-05	0	0	0	0	0	0	0	0	0	0	4.42229e-06	0	0	0	4.333e-06	0	0	0	0	0	0	0	0	0	0.00101627	0	3.97233e-05	4.30276e-05	4.74172e-06	0	0	4.54779e-06	0	0	9.12409e-05	0	4.99775e-06	0	0	4.74442e-06	0	0	0	4.66057e-06	0
Methanolobus	0	0	0	0	0	0	0	0	0	0	0	0	0	0	0	0	0	0	0	0	0	0	0	0	0	0	0	0	0.000104106	0	0	0	0	0	0	0	0	0	0	0	0	0	0	0	0	0	0	0	0
Otu408516	0	0	0	0	0	0	0	0	0	0	0	0	0	0	0	0	0	0	0	0	0	0	0	0	0	0	0	0	0.000104106	0	0	0	0	0	0	0	0	0	0	0	0	0	0	0	0	0	0	0	0
Methanomethylovorans	0	0	0	0	0	0	0	0	0	0	0	0	0	0	0	0	0	0	0	0	0	0	0	0	0	0	0	0	0	0	0	0	0	0	0	0	0	0	0	0	0	0	0	0	0	0	0	0	0
Otu408549	0	0	0	0	0	0	0	0	0	0	0	0	0	0	0	0	0	0	0	0	0	0	0	0	0	0	0	0	0	0	0	0	0	0	0	0	0	0	0	0	0	0	0	0	0	0	0	0	0
Methanosarcina	0	1.45221e-05	0	2.32037e-05	0	0	0	0	0	0	0	0	0	0	4.42229e-06	0	0	0	4.333e-06	0	0	0	0	0	0	0	0	0	0.000912165	0	3.97233e-05	4.30276e-05	4.74172e-06	0	0	4.54779e-06	0	0	9.12409e-05	0	4.99775e-06	0	0	4.74442e-06	0	0	0	4.66057e-06	0
Otu399393	0	1.45221e-05	0	2.32037e-05	0	0	0	0	0	0	0	0	0	0	4.42229e-06	0	0	0	4.333e-06	0	0	0	0	0	0	0	0	0	0.000540358	0	3.97233e-05	4.30276e-05	4.74172e-06	0	0	4.54779e-06	0	0	8.1103e-05	0	4.99775e-06	0	0	0	0	0	0	4.66057e-06	0
Otu402683	0	0	0	0	0	0	0	0	0	0	0	0	0	0	0	0	0	0	0	0	0	0	0	0	0	0	0	0	0.000242913	0	0	0	0	0	0	0	0	0	1.01379e-05	0	0	0	0	4.74442e-06	0	0	0	0	0
Otu408517	0	0	0	0	0	0	0	0	0	0	0	0	0	0	0	0	0	0	0	0	0	0	0	0	0	0	0	0	0.000128893	0	0	0	0	0	0	0	0	0	0	0	0	0	0	0	0	0	0	0	0
Methanotrichaceae	0	4.84069e-06	0	2.32037e-05	0	2.49068e-05	5.9522e-06	3.23572e-05	0	4.73115e-06	0	0	0	0	0	4.45458e-06	0	0	8.666e-06	0	0	1.83152e-05	0	0	0	0	0	0	0.00640002	0	1.48962e-05	9.56169e-06	0	0	0	9.09558e-06	0	0	5.06894e-06	4.77952e-06	0	4.57538e-06	0	2.37221e-05	0	5.02828e-06	0	9.32114e-06	0
Methanothrix	0	4.84069e-06	0	2.32037e-05	0	2.49068e-05	5.9522e-06	3.23572e-05	0	4.73115e-06	0	0	0	0	0	4.45458e-06	0	0	8.666e-06	0	0	1.83152e-05	0	0	0	0	0	0	0.00640002	0	1.48962e-05	9.56169e-06	0	0	0	9.09558e-06	0	0	5.06894e-06	4.77952e-06	0	4.57538e-06	0	2.37221e-05	0	5.02828e-06	0	9.32114e-06	0
Otu387143	0	4.84069e-06	0	2.32037e-05	0	2.49068e-05	5.9522e-06	3.23572e-05	0	4.73115e-06	0	0	0	0	0	4.45458e-06	0	0	8.666e-06	0	0	1.83152e-05	0	0	0	0	0	0	0.00640002	0	1.48962e-05	9.56169e-06	0	0	0	9.09558e-06	0	0	5.06894e-06	4.77952e-06	0	4.57538e-06	0	2.37221e-05	0	5.02828e-06	0	9.32114e-06	0
Thermoplasmata	4.6318e-06	0	0	0	0	0	0	0	0	0	0	0	0	0	0	0	0	0	0	0	0	0	0	0	0	0	0	0	0.000644464	0	1.48962e-05	4.78085e-06	0	0	0	0	0	0	1.01379e-05	4.77952e-06	0	0	0	0	0	0	0	0	0
Methanomassiliicoccales	4.6318e-06	0	0	0	0	0	0	0	0	0	0	0	0	0	0	0	0	0	0	0	0	0	0	0	0	0	0	0	0.000584975	0	1.48962e-05	4.78085e-06	0	0	0	0	0	0	1.01379e-05	4.77952e-06	0	0	0	0	0	0	0	0	0
Methanomassiliicoccaceae	4.6318e-06	0	0	0	0	0	0	0	0	0	0	0	0	0	0	0	0	0	0	0	0	0	0	0	0	0	0	0	0.000584975	0	1.48962e-05	4.78085e-06	0	0	0	0	0	0	1.01379e-05	4.77952e-06	0	0	0	0	0	0	0	0	0
Methanomassiliicoccus	4.6318e-06	0	0	0	0	0	0	0	0	0	0	0	0	0	0	0	0	0	0	0	0	0	0	0	0	0	0	0	0.000584975	0	1.48962e-05	4.78085e-06	0	0	0	0	0	0	1.01379e-05	4.77952e-06	0	0	0	0	0	0	0	0	0
Otu416409	4.6318e-06	0	0	0	0	0	0	0	0	0	0	0	0	0	0	0	0	0	0	0	0	0	0	0	0	0	0	0	0.000515571	0	1.48962e-05	4.78085e-06	0	0	0	0	0	0	1.01379e-05	4.77952e-06	0	0	0	0	0	0	0	0	0
Otu416413	0	0	0	0	0	0	0	0	0	0	0	0	0	0	0	0	0	0	0	0	0	0	0	0	0	0	0	0	6.94038e-05	0	0	0	0	0	0	0	0	0	0	0	0	0	0	0	0	0	0	0	0
unclassified	0	0	0	0	0	0	0	0	0	0	0	0	0	0	0	0	0	0	0	0	0	0	0	0	0	0	0	0	5.9489e-05	0	0	0	0	0	0	0	0	0	0	0	0	0	0	0	0	0	0	0	0
unclassified	0	0	0	0	0	0	0	0	0	0	0	0	0	0	0	0	0	0	0	0	0	0	0	0	0	0	0	0	5.9489e-05	0	0	0	0	0	0	0	0	0	0	0	0	0	0	0	0	0	0	0	0
unclassified	0	0	0	0	0	0	0	0	0	0	0	0	0	0	0	0	0	0	0	0	0	0	0	0	0	0	0	0	5.9489e-05	0	0	0	0	0	0	0	0	0	0	0	0	0	0	0	0	0	0	0	0
Otu399568	0	0	0	0	0	0	0	0	0	0	0	0	0	0	0	0	0	0	0	0	0	0	0	0	0	0	0	0	5.9489e-05	0	0	0	0	0	0	0	0	0	0	0	0	0	0	0	0	0	0	0	0
Firmicutes	0.372169	0.229647	0.163821	0.510913	0.254397	0.27528	0.423809	0.394046	0.267219	0.206089	0.48787	0.585768	0.664484	0.607952	0.534823	0.798007	0.383778	0.189118	0.676234	0.499553	0.284651	0.241353	0.455977	0.230483	0.356554	0.539383	0.306214	0.597719	0.566137	0.412782	0.582607	0.800237	0.337814	0.262969	0.268273	0.455475	0.119055	0.270019	0.344019	0.296464	0.409461	0.599256	0.583685	0.921831	0.49518	0.638964	0.431566	0.480957	0.454408
Bacilli	0.372077	0.22958	0.163764	0.510569	0.254062	0.275111	0.423684	0.392729	0.266999	0.205621	0.487664	0.58562	0.664212	0.607827	0.534682	0.797735	0.38363	0.189103	0.67616	0.499522	0.284625	0.241298	0.455918	0.230478	0.356525	0.539271	0.306205	0.597634	0.540576	0.41272	0.58225	0.800103	0.337753	0.262898	0.268218	0.454838	0.118985	0.26991	0.343715	0.296316	0.409306	0.598611	0.583568	0.920972	0.495014	0.638768	0.431485	0.480757	0.45438
Bacillales	0.00713296	0.0120098	0.0306319	7.88925e-05	8.15223e-05	5.97764e-05	0.000113092	0.000383664	0.000200527	4.73115e-05	5.37495e-05	7.36968e-05	6.01075e-05	4.16187e-05	5.30675e-05	6.68187e-05	4.14965e-05	2.03216e-05	3.4664e-05	8.90024e-06	0.000101019	5.03668e-05	2.46514e-05	3.06609e-05	4.73303e-06	4.20612e-05	5.82208e-05	3.96253e-05	0.00119474	2.4072e-05	8.44121e-05	3.34659e-05	4.74172e-06	0.0231528	0.0328037	0.305748	4.54757e-05	8.43593e-05	0.000405515	8.12519e-05	8.99595e-05	0.000196741	2.90774e-05	0.000327365	4.03522e-05	0.000100566	5.27575e-05	0.000102533	3.79992e-05
Bacillaceae 1	0.00710517	0.0119952	0.0304794	2.32037e-05	4.79543e-05	2.49068e-05	2.9761e-05	8.32043e-05	0.000144566	4.73115e-06	9.77264e-06	4.3351e-05	4.62366e-05	3.23701e-05	3.09561e-05	3.56366e-05	1.38322e-05	2.03216e-05	4.333e-06	8.90024e-06	9.59678e-05	4.12092e-05	1.97211e-05	2.55507e-05	0	9.34693e-06	5.82208e-05	9.90634e-06	0.000654379	1.92576e-05	3.97233e-05	1.43425e-05	0	0.0229539	0.0321324	0.304984	3.537e-05	7.44347e-05	0.000126723	4.30157e-05	4.49798e-05	5.49046e-05	9.69246e-06	0.000175543	2.24179e-05	1.00566e-05	3.3573e-05	4.19451e-05	3.79992e-05
Anoxybacillus	0	0	0	0	0	0	0	0	2.79805e-05	0	0	8.67021e-06	0	0	1.32669e-05	0	0	0	0	0	2.02038e-05	0	0	1.53304e-05	0	0	5.37423e-05	0	9.91483e-06	1.44432e-05	0	0	0	0	1.01717e-05	2.2739e-05	0	0	3.04136e-05	3.82362e-05	0	9.15076e-06	0	3.79553e-05	1.79343e-05	0	9.59228e-06	1.39817e-05	0
Otu1031	0	0	0	0	0	0	0	0	2.79805e-05	0	0	8.67021e-06	0	0	1.32669e-05	0	0	0	0	0	2.02038e-05	0	0	1.53304e-05	0	0	5.37423e-05	0	9.91483e-06	1.44432e-05	0	0	0	0	1.01717e-05	2.2739e-05	0	0	3.04136e-05	3.82362e-05	0	9.15076e-06	0	3.79553e-05	1.79343e-05	0	9.59228e-06	1.39817e-05	0
Bacillus	0.00710517	0.0119952	0.0304746	2.32037e-05	4.79543e-05	2.49068e-05	2.9761e-05	8.32043e-05	0.000116585	4.73115e-06	9.77264e-06	3.46808e-05	4.62366e-05	3.23701e-05	1.76892e-05	3.56366e-05	1.38322e-05	2.03216e-05	4.333e-06	8.90024e-06	7.57641e-05	4.12092e-05	1.97211e-05	1.02203e-05	0	9.34693e-06	4.47852e-06	9.90634e-06	0.000644464	4.8144e-06	3.97233e-05	1.43425e-05	0	0.0229539	0.0320459	0.304961	3.537e-05	7.44347e-05	9.63098e-05	4.77952e-06	4.49798e-05	4.57538e-05	9.69246e-06	0.000137588	4.48358e-06	1.00566e-05	2.39807e-05	2.79634e-05	3.79992e-05
Otu1011	4.6318e-06	3.38848e-05	2.38306e-05	1.39222e-05	4.79543e-06	9.96274e-06	0	0	1.39903e-05	0	0	0	4.62366e-06	0	4.42229e-06	0	0	0	0	0	0	0	0	0	0	0	0	0	4.95742e-06	0	0	0	0	5.20927e-05	3.05151e-05	0.000131886	1.01057e-05	2.48116e-05	1.52068e-05	0	4.99775e-06	0	0	0	0	0	0	0	0
Otu1045	0	0	0	0	0	0	0	0	0	0	0	0	4.62366e-06	0	0	0	0	2.03216e-05	0	0	7.57641e-05	9.15759e-06	0	0	0	0	0	4.95317e-06	0	4.8144e-06	4.96542e-06	0	0	4.7357e-06	0	0	0	0	0	0	0	0	0	0	0	0	0	0	0
Otu1086	0	0	0	0	0	0	0	0	0	0	0	0	0	0	0	0	0	0	0	0	0	0	0	0	0	0	0	0	4.46167e-05	0	0	0	0	9.4714e-06	0	0	0	0	0	0	0	0	0	0	0	0	0	0	0
Otu14048	0	0	0	0	0	0	0	0	1.86537e-05	0	0	0	0	0	0	0	0	0	0	0	0	0	0	0	0	0	0	0	8.42761e-05	0	0	0	0	0	0	0	0	0	5.06894e-05	0	0	0	0	0	0	0	2.39807e-05	0	0
Otu14488	0	0	0	0	1.91817e-05	0	5.9522e-06	0	0	0	0	4.3351e-06	0	0	4.42229e-06	0	0	0	0	0	0	0	0	0	0	0	0	0	0	0	0	0	0	0	0	9.09558e-06	0	0	1.01379e-05	0	0	0	0	0	0	0	0	0	0
Otu232	0	0	0.000100089	0	0	0	0	0	0	0	0	0	0	0	0	0	0	0	0	0	0	0	0	0	0	0	0	0	0	0	0	0	0	0.000241521	0	0.000213746	0	0	0	0	0	0	0	0	0	0	0	0	0
Otu237	4.6318e-06	4.84069e-06	9.53225e-06	9.28147e-06	1.91817e-05	4.98137e-06	2.38088e-05	7.85818e-05	6.99513e-05	4.73115e-06	0	2.16755e-05	3.23656e-05	9.2486e-06	4.42229e-06	1.33637e-05	4.61072e-06	0	0	0	0	3.20516e-05	0	5.11015e-06	0	0	0	4.95317e-06	8.92335e-05	0	1.48962e-05	0	0	0	1.01717e-05	3.63823e-05	5.05285e-06	4.96231e-06	0	0	0	4.57538e-05	4.84623e-06	4.26998e-05	4.48358e-06	5.02828e-06	0	1.86423e-05	1.42497e-05
Otu239	0	0	0	0	0	0	0	0	0	0	0	0	0	0	0	0	0	0	0	0	0	0	0	0	0	0	0	0	9.91483e-05	0	0	0	0	0	0	0	0	0	0	0	0	0	0	0	0	0	0	0	0
Otu257	4.6318e-06	2.90442e-05	4.76613e-06	0	0	0	0	0	0	0	0	0	0	0	0	0	0	0	0	0	0	0	0	0	0	0	0	0	0	0	0	0	0	3.31499e-05	5.59443e-05	9.09558e-05	0	0	0	0	0	0	0	0	0	0	0	0	0
Otu283498	0	0	0	0	0	0	0	0	0	0	0	0	0	0	0	0	0	0	0	0	0	0	0	0	0	0	0	0	0	0	0	0	0	4.7357e-06	0	0.00047297	0	0	0	0	0	0	0	0	0	0	0	0	0
Otu32744	0	0	0	0	0	0	0	0	0	0	0	0	0	0	0	0	4.61072e-06	0	0	0	0	0	0	0	0	0	0	0	4.95742e-06	0	0	0	0	0	0	0	0	0	1.01379e-05	0	0	0	0	0	0	0	0	0	0
Otu442739	0	0	0.000109621	0	0	0	0	0	0	0	0	0	0	0	0	0	0	0	0	0	0	0	0	0	0	0	0	0	0	0	0	0	0	0	0	0	0	0	0	0	0	0	0	0	0	0	0	0	0
Otu50189	0	0	0	0	0	0	0	0	0	0	0	0	0	0	0	0	0	0	0	0	0	0	0	0	0	0	0	0	0	0	0	0	0	0	0	0.000322893	0	0	0	0	0	0	0	0	0	0	0	0	0
Otu507916	0	0	0	0	0	0	0	0	0	0	0	0	0	0	0	0	0	0	0	0	0	0	0	0	0	0	0	0	0	0	0	0	0	7.10355e-05	0	0	0	0	0	0	0	0	0	0	0	0	0	0	0
Otu64346	9.26359e-06	9.68139e-06	4.28951e-05	0	0	0	0	0	0	0	0	0	0	0	0	0	0	0	0	0	0	0	0	0	0	0	0	0	0	0	0	0	0	0.000108921	2.54292e-05	0.000409301	0	0	0	0	0	0	0	0	0	0	0	0	0
Otu70	0.00708202	0.01185	0.0301839	0	4.79543e-06	9.96274e-06	0	4.62246e-06	1.39903e-05	0	9.77264e-06	0	4.62366e-06	2.31215e-05	4.42229e-06	2.22729e-05	4.61072e-06	0	4.333e-06	8.90024e-06	0	0	1.97211e-05	5.11015e-06	0	9.34693e-06	4.47852e-06	0	5.45316e-05	0	1.98617e-05	1.43425e-05	0	0.0224235	0.0319188	0.303269	2.02114e-05	4.46608e-05	1.01379e-05	4.77952e-06	3.49843e-05	0	4.84623e-06	8.53995e-05	0	5.02828e-06	0	9.32114e-06	2.37495e-05
Otu86920	0	6.77697e-05	0	0	0	0	0	0	0	0	0	0	0	0	0	0	0	0	0	0	0	0	0	0	0	0	0	0	0	0	0	0	0	0	0	4.54779e-06	0	0	0	0	0	0	0	0	0	0	0	0	0
Otu95595	0	0	0	0	0	0	0	0	0	0	0	0	0	0	0	0	0	0	0	0	0	0	0	0	0	0	0	0	1.98297e-05	0	0	0	0	0	0	0	0	0	0	0	0	0	0	0	0	0	0	0	0
Otu995	0	0	0	0	0	0	0	0	0	0	0	8.67021e-06	0	0	0	0	0	0	0	0	0	0	0	0	0	0	0	0	0.000242913	0	0	0	0	4.7357e-06	5.08585e-06	0	0	0	0	0	4.99775e-06	0	0	9.48884e-06	0	0	0	0	0
unclassified	0	0	4.76613e-06	0	0	0	0	0	0	0	0	0	0	0	0	0	0	0	0	0	0	0	0	0	0	0	0	0	0	0	0	0	0	0	7.62877e-05	0	0	0	0	0	0	0	0	0	0	0	0	0	0
Otu89362	0	0	4.76613e-06	0	0	0	0	0	0	0	0	0	0	0	0	0	0	0	0	0	0	0	0	0	0	0	0	0	0	0	0	0	0	0	7.62877e-05	0	0	0	0	0	0	0	0	0	0	0	0	0	0
Bacillaceae 2	0	0	0	0	0	0	5.35698e-05	0	0	0	0	0	0	0	0	0	0	0	0	0	0	0	0	0	0	0	0	0	0	0	0	0	4.74172e-06	1.42071e-05	0	4.54779e-06	0	0	0	0	0	4.57538e-06	0	0	0	0	0	0	0
Oceanobacillus	0	0	0	0	0	0	5.35698e-05	0	0	0	0	0	0	0	0	0	0	0	0	0	0	0	0	0	0	0	0	0	0	0	0	0	4.74172e-06	1.42071e-05	0	4.54779e-06	0	0	0	0	0	4.57538e-06	0	0	0	0	0	0	0
Otu1078	0	0	0	0	0	0	5.35698e-05	0	0	0	0	0	0	0	0	0	0	0	0	0	0	0	0	0	0	0	0	0	0	0	0	0	4.74172e-06	1.42071e-05	0	4.54779e-06	0	0	0	0	0	4.57538e-06	0	0	0	0	0	0	0
Listeriaceae	4.6318e-06	0	0	0	0	4.98137e-06	5.9522e-06	0	0	0	0	0	0	0	4.42229e-06	8.90916e-06	0	0	0	0	0	0	0	0	0	0	0	0	7.93187e-05	0	0	4.78085e-06	0	0	0	0	0	0	0	0	0	0	0	0	4.48358e-06	5.02828e-06	0	9.32114e-06	0
Brochothrix	4.6318e-06	0	0	0	0	4.98137e-06	5.9522e-06	0	0	0	0	0	0	0	4.42229e-06	8.90916e-06	0	0	0	0	0	0	0	0	0	0	0	0	7.93187e-05	0	0	4.78085e-06	0	0	0	0	0	0	0	0	0	0	0	0	4.48358e-06	5.02828e-06	0	9.32114e-06	0
Otu1041	4.6318e-06	0	0	0	0	4.98137e-06	5.9522e-06	0	0	0	0	0	0	0	4.42229e-06	8.90916e-06	0	0	0	0	0	0	0	0	0	0	0	0	7.93187e-05	0	0	4.78085e-06	0	0	0	0	0	0	0	0	0	0	0	0	4.48358e-06	5.02828e-06	0	9.32114e-06	0
Paenibacillaceae 1	4.6318e-06	0	0.000123919	0	9.59085e-06	0	0	7.85818e-05	2.33171e-05	1.41935e-05	4.88632e-06	4.3351e-06	0	0	4.42229e-06	0	0	0	4.333e-06	0	0	0	4.93029e-06	0	0	0	0	4.95317e-06	0	0	9.93083e-06	0	0	1.89428e-05	0.000615388	0.000563926	0	0	0	0	0	0	0	9.48884e-06	0	5.02828e-06	0	9.32114e-06	0
Brevibacillus	4.6318e-06	0	0	0	9.59085e-06	0	0	7.85818e-05	2.33171e-05	1.41935e-05	4.88632e-06	4.3351e-06	0	0	4.42229e-06	0	0	0	4.333e-06	0	0	0	4.93029e-06	0	0	0	0	4.95317e-06	0	0	9.93083e-06	0	0	0	5.08585e-06	1.81912e-05	0	0	0	0	0	0	0	9.48884e-06	0	5.02828e-06	0	9.32114e-06	0
Otu1204	4.6318e-06	0	0	0	9.59085e-06	0	0	7.85818e-05	2.33171e-05	1.41935e-05	4.88632e-06	4.3351e-06	0	0	4.42229e-06	0	0	0	4.333e-06	0	0	0	4.93029e-06	0	0	0	0	4.95317e-06	0	0	9.93083e-06	0	0	0	5.08585e-06	1.81912e-05	0	0	0	0	0	0	0	9.48884e-06	0	5.02828e-06	0	9.32114e-06	0
Paenibacillus	0	0	0.000123919	0	0	0	0	0	0	0	0	0	0	0	0	0	0	0	0	0	0	0	0	0	0	0	0	0	0	0	0	0	0	1.89428e-05	0.000610302	0.000545735	0	0	0	0	0	0	0	0	0	0	0	0	0
Otu14026	0	0	0.000123919	0	0	0	0	0	0	0	0	0	0	0	0	0	0	0	0	0	0	0	0	0	0	0	0	0	0	0	0	0	0	1.42071e-05	0.000610302	2.72867e-05	0	0	0	0	0	0	0	0	0	0	0	0	0
Otu14027	0	0	0	0	0	0	0	0	0	0	0	0	0	0	0	0	0	0	0	0	0	0	0	0	0	0	0	0	0	0	0	0	0	0	0	0.000463875	0	0	0	0	0	0	0	0	0	0	0	0	0
Otu36292	0	0	0	0	0	0	0	0	0	0	0	0	0	0	0	0	0	0	0	0	0	0	0	0	0	0	0	0	0	0	0	0	0	4.7357e-06	0	5.45735e-05	0	0	0	0	0	0	0	0	0	0	0	0	0
Planococcaceae	9.26359e-06	4.84069e-06	1.90645e-05	5.10481e-05	2.39771e-05	2.49068e-05	1.78566e-05	9.24492e-05	9.32684e-06	4.73115e-06	2.93179e-05	1.30053e-05	4.62366e-06	9.2486e-06	1.32669e-05	4.45458e-06	2.30536e-05	0	1.2999e-05	0	5.05094e-06	0	0	0	4.73303e-06	3.27143e-05	0	1.48595e-05	9.41909e-05	0	1.98617e-05	4.78085e-06	0	2.84142e-05	2.54292e-05	8.18602e-05	1.01057e-05	4.96231e-06	4.05515e-05	1.91181e-05	3.9982e-05	8.23569e-05	1.93849e-05	8.53995e-05	1.34507e-05	7.54243e-05	1.91846e-05	1.39817e-05	0
Lysinibacillus	9.26359e-06	4.84069e-06	1.42984e-05	4.64074e-05	1.43863e-05	2.49068e-05	1.19044e-05	6.0092e-05	4.66342e-06	4.73115e-06	1.95453e-05	8.67021e-06	4.62366e-06	4.6243e-06	8.84459e-06	0	2.30536e-05	0	8.666e-06	0	5.05094e-06	0	0	0	0	2.80408e-05	0	1.48595e-05	1.48722e-05	0	1.48962e-05	4.78085e-06	0	2.36785e-05	1.52575e-05	7.73124e-05	1.01057e-05	4.96231e-06	1.52068e-05	1.91181e-05	2.99865e-05	8.23569e-05	1.93849e-05	7.11663e-05	8.96716e-06	7.54243e-05	0	1.39817e-05	0
Otu60410	0	0	0	0	0	0	0	0	0	0	0	0	0	0	0	0	0	0	0	0	0	0	0	0	0	0	0	0	4.95742e-06	0	0	0	0	0	0	0	0	0	0	0	0	0	0	0	0	0	0	0	0
Otu994	9.26359e-06	4.84069e-06	1.42984e-05	4.64074e-05	1.43863e-05	2.49068e-05	1.19044e-05	6.0092e-05	4.66342e-06	4.73115e-06	1.95453e-05	8.67021e-06	4.62366e-06	4.6243e-06	8.84459e-06	0	2.30536e-05	0	8.666e-06	0	5.05094e-06	0	0	0	0	2.80408e-05	0	1.48595e-05	9.91483e-06	0	1.48962e-05	4.78085e-06	0	2.36785e-05	1.52575e-05	7.73124e-05	1.01057e-05	4.96231e-06	1.52068e-05	1.91181e-05	2.99865e-05	8.23569e-05	1.93849e-05	7.11663e-05	8.96716e-06	7.54243e-05	0	1.39817e-05	0
Planococcus	0	0	0	4.64074e-06	9.59085e-06	0	5.9522e-06	2.31123e-05	4.66342e-06	0	0	4.3351e-06	0	4.6243e-06	4.42229e-06	4.45458e-06	0	0	0	0	0	0	0	0	0	4.67347e-06	0	0	6.44464e-05	0	0	0	0	4.7357e-06	1.01717e-05	4.54779e-06	0	0	0	0	4.99775e-06	0	0	1.42333e-05	0	0	0	0	0
Otu14052	0	0	0	4.64074e-06	9.59085e-06	0	5.9522e-06	2.31123e-05	4.66342e-06	0	0	4.3351e-06	0	4.6243e-06	4.42229e-06	4.45458e-06	0	0	0	0	0	0	0	0	0	4.67347e-06	0	0	6.44464e-05	0	0	0	0	4.7357e-06	1.01717e-05	4.54779e-06	0	0	0	0	4.99775e-06	0	0	1.42333e-05	0	0	0	0	0
Solibacillus	0	0	4.76613e-06	0	0	0	0	4.62246e-06	0	0	9.77264e-06	0	0	0	0	0	0	0	4.333e-06	0	0	0	0	0	4.73303e-06	0	0	0	0	0	4.96542e-06	0	0	0	0	0	0	0	1.52068e-05	0	4.99775e-06	0	0	0	0	0	9.59228e-06	0	0
Otu218	0	0	0	0	0	0	0	0	0	0	0	0	0	0	0	0	0	0	0	0	0	0	0	0	0	0	0	0	0	0	0	0	0	0	0	0	0	0	0	0	0	0	0	0	0	0	0	0	0
Otu349446	0	0	0	0	0	0	0	0	0	0	9.77264e-06	0	0	0	0	0	0	0	4.333e-06	0	0	0	0	0	4.73303e-06	0	0	0	0	0	0	0	0	0	0	0	0	0	0	0	4.99775e-06	0	0	0	0	0	9.59228e-06	0	0
Otu64349	0	0	0	0	0	0	0	0	0	0	0	0	0	0	0	0	0	0	0	0	0	0	0	0	0	0	0	0	0	0	0	0	0	0	0	0	0	0	0	0	0	0	0	0	0	0	0	0	0
Otu94758	0	0	4.76613e-06	0	0	0	0	4.62246e-06	0	0	0	0	0	0	0	0	0	0	0	0	0	0	0	0	0	0	0	0	0	0	4.96542e-06	0	0	0	0	0	0	0	1.52068e-05	0	0	0	0	0	0	0	0	0	0
Sporosarcina	0	0	0	0	0	0	0	4.62246e-06	0	0	0	0	0	0	0	0	0	0	0	0	0	0	0	0	0	0	0	0	0	0	0	0	0	0	0	0	0	0	0	0	0	0	0	0	0	0	9.59228e-06	0	0
Otu29193	0	0	0	0	0	0	0	4.62246e-06	0	0	0	0	0	0	0	0	0	0	0	0	0	0	0	0	0	0	0	0	0	0	0	0	0	0	0	0	0	0	0	0	0	0	0	0	0	0	9.59228e-06	0	0
unclassified	0	0	0	0	0	0	0	0	0	0	0	0	0	0	0	0	0	0	0	0	0	0	0	0	0	0	0	0	1.48722e-05	0	0	0	0	0	0	0	0	0	1.01379e-05	0	0	0	0	0	4.48358e-06	0	0	0	0
Otu232582	0	0	0	0	0	0	0	0	0	0	0	0	0	0	0	0	0	0	0	0	0	0	0	0	0	0	0	0	0	0	0	0	0	0	0	0	0	0	0	0	0	0	0	0	0	0	0	0	0
Otu343507	0	0	0	0	0	0	0	0	0	0	0	0	0	0	0	0	0	0	0	0	0	0	0	0	0	0	0	0	0	0	0	0	0	0	0	0	0	0	0	0	0	0	0	0	0	0	0	0	0
Otu531880	0	0	0	0	0	0	0	0	0	0	0	0	0	0	0	0	0	0	0	0	0	0	0	0	0	0	0	0	0	0	0	0	0	0	0	0	0	0	1.01379e-05	0	0	0	0	0	0	0	0	0	0
Otu64344	0	0	0	0	0	0	0	0	0	0	0	0	0	0	0	0	0	0	0	0	0	0	0	0	0	0	0	0	1.48722e-05	0	0	0	0	0	0	0	0	0	0	0	0	0	0	0	4.48358e-06	0	0	0	0
Staphylococcaceae	4.6318e-06	4.84069e-06	0	4.64074e-06	0	0	5.9522e-06	0.000129429	2.33171e-05	1.41935e-05	4.88632e-06	1.30053e-05	9.24731e-06	0	0	1.78183e-05	4.61072e-06	0	4.333e-06	0	0	9.15759e-06	0	5.11015e-06	0	0	0	9.90634e-06	0.000366849	4.8144e-06	9.93083e-06	9.56169e-06	0	0	3.05151e-05	0	0	4.96231e-06	5.06894e-06	1.91181e-05	4.99775e-06	5.49046e-05	0	5.6933e-05	0	5.02828e-06	0	1.86423e-05	0
Macrococcus	0	0	0	0	0	0	0	0	0	1.41935e-05	0	0	0	0	0	0	0	0	0	0	0	4.5788e-06	0	0	0	0	0	0	0.000123935	0	0	0	0	0	0	0	0	4.96231e-06	0	0	0	0	0	0	0	0	0	0	0
Otu1012	0	0	0	0	0	0	0	0	0	1.41935e-05	0	0	0	0	0	0	0	0	0	0	0	4.5788e-06	0	0	0	0	0	0	0.000123935	0	0	0	0	0	0	0	0	4.96231e-06	0	0	0	0	0	0	0	0	0	0	0
Staphylococcus	4.6318e-06	4.84069e-06	0	4.64074e-06	0	0	5.9522e-06	0.000129429	2.33171e-05	0	4.88632e-06	1.30053e-05	9.24731e-06	0	0	1.78183e-05	4.61072e-06	0	4.333e-06	0	0	4.5788e-06	0	5.11015e-06	0	0	0	9.90634e-06	0.000242913	4.8144e-06	9.93083e-06	9.56169e-06	0	0	3.05151e-05	0	0	0	5.06894e-06	1.91181e-05	4.99775e-06	5.49046e-05	0	5.6933e-05	0	5.02828e-06	0	1.86423e-05	0
Otu1005	0	0	0	0	0	0	0	8.78268e-05	0	0	0	0	0	0	0	0	0	0	0	0	0	0	0	0	0	0	0	0	0.000163595	4.8144e-06	4.96542e-06	0	0	0	0	0	0	0	0	0	0	0	0	0	0	0	0	4.66057e-06	0
Otu1062	4.6318e-06	4.84069e-06	0	4.64074e-06	0	0	5.9522e-06	4.16021e-05	2.33171e-05	0	4.88632e-06	1.30053e-05	9.24731e-06	0	0	1.78183e-05	4.61072e-06	0	4.333e-06	0	0	4.5788e-06	0	5.11015e-06	0	0	0	9.90634e-06	7.93187e-05	0	4.96542e-06	9.56169e-06	0	0	3.05151e-05	0	0	0	5.06894e-06	1.91181e-05	4.99775e-06	5.49046e-05	0	5.6933e-05	0	5.02828e-06	0	1.39817e-05	0
unclassified	4.6318e-06	4.84069e-06	9.53225e-06	0	0	4.98137e-06	0	0	0	9.4623e-06	4.88632e-06	0	0	0	0	0	0	0	8.666e-06	0	0	0	0	0	0	0	0	0	0	0	4.96542e-06	0	0	0.000137335	0	0.000113695	0	0	0.000233171	0	0	0	0	0	0	0	0	9.32114e-06	0
unclassified	4.6318e-06	4.84069e-06	9.53225e-06	0	0	4.98137e-06	0	0	0	9.4623e-06	4.88632e-06	0	0	0	0	0	0	0	8.666e-06	0	0	0	0	0	0	0	0	0	0	0	4.96542e-06	0	0	0.000137335	0	0.000113695	0	0	0.000233171	0	0	0	0	0	0	0	0	9.32114e-06	0
Otu14061	4.6318e-06	0	9.53225e-06	0	0	0	0	0	0	0	0	0	0	0	0	0	0	0	0	0	0	0	0	0	0	0	0	0	0	0	0	0	0	0.000137335	0	9.09558e-06	0	0	0	0	0	0	0	0	0	0	0	0	0
Otu354542	0	0	0	0	0	0	0	0	0	0	0	0	0	0	0	0	0	0	0	0	0	0	0	0	0	0	0	0	0	0	0	0	0	0	0	0	0	0	0	0	0	0	0	0	0	0	0	0	0
Otu36268	0	0	0	0	0	4.98137e-06	0	0	0	9.4623e-06	4.88632e-06	0	0	0	0	0	0	0	8.666e-06	0	0	0	0	0	0	0	0	0	0	0	4.96542e-06	0	0	0	0	0	0	0	0.000233171	0	0	0	0	0	0	0	0	9.32114e-06	0
Otu456664	0	4.84069e-06	0	0	0	0	0	0	0	0	0	0	0	0	0	0	0	0	0	0	0	0	0	0	0	0	0	0	0	0	0	0	0	0	0	0.000104599	0	0	0	0	0	0	0	0	0	0	0	0	0
Lactobacillales	0.364944	0.21757	0.133132	0.51049	0.25398	0.275051	0.423458	0.392345	0.266799	0.205573	0.487611	0.585547	0.664151	0.607785	0.53462	0.797668	0.383584	0.189082	0.676126	0.499513	0.284524	0.241248	0.455894	0.230447	0.35652	0.539229	0.306147	0.597595	0.539089	0.412696	0.582165	0.800065	0.337748	0.23974	0.235414	0.149058	0.118939	0.269826	0.343304	0.296235	0.409216	0.598405	0.583539	0.920645	0.494974	0.638668	0.431432	0.480654	0.454342
Aerococcaceae	0	0	0	0	0	0	0	0	0	0	0	0	0	0	0	0	0	0	0	0	0	4.5788e-06	0	0	0	0	0	0	7.93187e-05	0	0	0	0	0	0	0	0	0	0	0	0	0	0	0	0	0	0	0	0
Facklamia	0	0	0	0	0	0	0	0	0	0	0	0	0	0	0	0	0	0	0	0	0	4.5788e-06	0	0	0	0	0	0	7.93187e-05	0	0	0	0	0	0	0	0	0	0	0	0	0	0	0	0	0	0	0	0
Otu41633	0	0	0	0	0	0	0	0	0	0	0	0	0	0	0	0	0	0	0	0	0	4.5788e-06	0	0	0	0	0	0	7.93187e-05	0	0	0	0	0	0	0	0	0	0	0	0	0	0	0	0	0	0	0	0
Carnobacteriaceae	4.6318e-06	1.45221e-05	0	9.74555e-05	2.39771e-05	2.98882e-05	4.76176e-05	6.93369e-05	0.000130576	0.000477846	0.000131931	0.000307792	0.000175699	0.000411563	0.000163625	0.000806279	0.000272032	0.000203216	0.000424634	5.34014e-05	1.01019e-05	0.000137364	0	1.53304e-05	0.000283982	0.000191612	5.82208e-05	6.43912e-05	0.000257786	6.74017e-05	0.00213016	0.00580395	0.00270278	9.4714e-06	5.08585e-06	3.18345e-05	5.05285e-06	2.48116e-05	4.05515e-05	0.000119488	0.000144935	0.000581073	0.000174464	0.000412764	0.000152442	0.000191075	0.000163069	0.000205065	0.000332493
Carnobacterium	4.6318e-06	1.45221e-05	0	9.74555e-05	2.39771e-05	2.98882e-05	4.76176e-05	6.93369e-05	0.000130576	6.1505e-05	0.000131931	0.000307792	0.000175699	0.000411563	0.000163625	0.000806279	0.000272032	0.000203216	0.000424634	5.34014e-05	1.01019e-05	0.000137364	0	1.53304e-05	0.000283982	0.000191612	5.82208e-05	6.43912e-05	0.00017351	6.74017e-05	0.00213016	0.00580395	0.00270278	9.4714e-06	5.08585e-06	3.18345e-05	5.05285e-06	2.48116e-05	4.05515e-05	0.000119488	0.000144935	0.000581073	0.000174464	0.000412764	0.000152442	0.000191075	0.000163069	0.000205065	0.000332493
Otu11476	4.6318e-06	0	0	0	0	0	0	0	0	0	0	0	0	0	0	0	1.38322e-05	0	0	0	0	0	0	0	0	0	0	0	4.95742e-05	0	0.000253236	0.000444619	0	0	0	0	0	0	2.53447e-05	0	0	0	0	0	1.79343e-05	0	0	0	0
Otu15190	0	0	0	0	0	0	0	0	0	1.41935e-05	0	4.3351e-06	4.62366e-06	0	0	0	4.61072e-06	0	8.666e-06	0	0	0	0	5.11015e-06	4.73303e-06	0	8.95704e-06	0	0	0	4.46887e-05	5.73702e-05	1.42252e-05	0	0	0	5.05285e-06	4.96231e-06	0	0	0	4.57538e-06	1.93849e-05	4.74442e-06	0	0	0	0	3.32493e-05
Otu176445	0	0	0	4.64074e-06	0	0	0	0	0	0	0	0	0	0	0	0	0	0	0	0	0	0	0	0	0	0	0	0	0	0	4.96542e-06	4.78085e-06	0	0	0	0	0	0	0	0	0	0	0	0	0	0	0	0	0
Otu216	0	1.45221e-05	0	9.28147e-05	2.39771e-05	2.98882e-05	4.76176e-05	6.93369e-05	0.000130576	4.73115e-05	0.000131931	0.000303457	0.000171075	0.000411563	0.000163625	0.000806279	0.000253589	0.000203216	0.000415968	5.34014e-05	1.01019e-05	0.000137364	0	1.02203e-05	0.000279249	0.000191612	4.92637e-05	6.43912e-05	0.000123935	6.74017e-05	0.00182727	0.00529718	0.00268855	9.4714e-06	5.08585e-06	3.18345e-05	0	1.98492e-05	1.52068e-05	0.000119488	0.000144935	0.000576498	0.000155079	0.00040802	0.000134507	0.000191075	0.000163069	0.000205065	0.000299243
unclassified	0	0	0	0	0	0	0	0	0	0.000416341	0	0	0	0	0	0	0	0	0	0	0	0	0	0	0	0	0	0	8.42761e-05	0	0	0	0	0	0	0	0	0	0	0	0	0	0	0	0	0	0	0	0
Otu101174	0	0	0	0	0	0	0	0	0	0.000416341	0	0	0	0	0	0	0	0	0	0	0	0	0	0	0	0	0	0	0	0	0	0	0	0	0	0	0	0	0	0	0	0	0	0	0	0	0	0	0
Otu64364	0	0	0	0	0	0	0	0	0	0	0	0	0	0	0	0	0	0	0	0	0	0	0	0	0	0	0	0	8.42761e-05	0	0	0	0	0	0	0	0	0	0	0	0	0	0	0	0	0	0	0	0
Enterococcaceae	0.000384439	0.000130699	0.000104855	0.000167067	0.000143863	0.000124534	0.0009464	0.00147919	0.000373073	0.000520427	0.00094306	0.000346808	0.000397635	0.000693645	0.00189274	0.000766188	0.001291	0.000233698	0.00021665	0.000413861	0.000191936	0.000329673	0.000611355	0.000546786	0.000189321	0.00471085	0.0104573	0.000104017	0.00362387	0.000991767	0.0162667	0.00227568	0.000649615	0.000236785	0.00020852	0.000154625	4.54757e-05	5.45854e-05	0.000319343	0.000286771	0.00627218	0.000695458	0.000290774	0.000896695	0.000394555	0.000663734	0.00386569	0.000591892	0.000755233
Enterococcus	0.00023159	9.68139e-05	7.6258e-05	0.000143863	7.19314e-05	9.4646e-05	0.00035118	0.00139136	0.000265815	0.000487309	0.000498405	0.000186409	0.000258925	0.000568789	0.000296294	0.000298457	0.0002582	9.65275e-05	8.666e-05	0.000298158	0.000116172	0.000260991	0.000611355	0.000531456	0.000146724	0.00466879	0.0103767	8.9157e-05	0.0035743	0.000991767	0.0161674	0.0021227	0.000535814	0.00016575	7.62877e-05	0.00012279	3.03171e-05	3.47362e-05	0.000223033	0.000172063	0.00613724	0.000279098	0.000189003	0.000455464	0.000251081	0.00029164	0.00366905	0.000223707	0.000194746
Otu128	0.000171376	9.68139e-05	7.6258e-05	0.000106737	6.7136e-05	7.47205e-05	0.000190471	0.00139136	0.000214517	0.000487309	0.000415337	0.000117048	0.00018957	0.000564164	0.000296294	0.000245002	0.000152154	4.06432e-05	8.2327e-05	0.000289258	6.06113e-05	0.000256413	0.000601495	0.0003526	0.000146724	0.00461271	0.0103319	7.42975e-05	0.00348011	0.000986953	0.0161227	0.00211791	0.000336662	0.0001326	5.59443e-05	0.00012279	2.02114e-05	9.92462e-06	8.1103e-05	0.000172063	0.00604728	0.000219618	0.000164772	0.000332109	0.000251081	0.000211188	0.0036067	0.000135157	0.000147247
Otu145774	0	0	0	0	0	0	0	0	0	0	0	0	0	0	0	0	0	0	0	0	0	0	0	0	0	0	0	0	4.95742e-06	0	4.96542e-06	0	0	0	0	0	0	0	0	0	0	0	0	0	0	0	0	0	0
Otu36293	0	0	0	0	0	0	0	0	0	0	0	0	0	0	0	0	0	0	0	0	0	0	4.93029e-06	0	0	0	2.23926e-05	0	0	0	0	4.78085e-06	4.74172e-06	0	0	0	0	0	0	0	0	0	0	0	0	0	5.75537e-05	0	0
Otu992	6.02133e-05	0	0	3.71259e-05	4.79543e-06	1.99255e-05	0.00016071	0	5.12976e-05	0	8.30674e-05	6.93617e-05	6.93549e-05	4.6243e-06	0	5.3455e-05	0.000106046	5.58844e-05	4.333e-06	8.90024e-06	5.55603e-05	4.5788e-06	4.93029e-06	0.000178855	0	5.60816e-05	2.23926e-05	1.48595e-05	8.92335e-05	4.8144e-06	3.97233e-05	0	0.00019441	3.31499e-05	2.03434e-05	0	1.01057e-05	2.48116e-05	0.00014193	0	8.99595e-05	5.948e-05	2.42311e-05	0.000123355	0	8.04525e-05	4.79614e-06	8.85508e-05	4.74989e-05
unclassified	0	0	0	0	0	0	0	0	0	0	0	0	0	0	0	0	0	0	0	0	0	0	0	1.02203e-05	0	9.34693e-06	7.61349e-05	0	0	0	0	3.34659e-05	0	0	0	0	0	0	0	0	0	0	0	0	0	0	0	0	0
Otu63232	0	0	0	0	0	0	0	0	0	0	0	0	0	0	0	0	0	0	0	0	0	0	0	1.02203e-05	0	0	6.71778e-05	0	0	0	0	0	0	0	0	0	0	0	0	0	0	0	0	0	0	0	0	0	0
Otu9557	0	0	0	0	0	0	0	0	0	0	0	0	0	0	0	0	0	0	0	0	0	0	0	0	0	9.34693e-06	8.95704e-06	0	0	0	0	3.34659e-05	0	0	0	0	0	0	0	0	0	0	0	0	0	0	0	0	0
Vagococcus	0.000152849	3.38848e-05	2.85968e-05	2.32037e-05	7.19314e-05	2.98882e-05	0.00059522	8.78268e-05	0.000107259	3.31181e-05	0.000444655	0.000160399	0.00013871	0.000124856	0.00159645	0.000467731	0.0010328	0.000137171	0.00012999	0.000115703	7.57641e-05	6.86819e-05	0	5.11015e-06	4.25973e-05	3.27143e-05	4.47852e-06	1.48595e-05	4.95742e-05	0	9.93083e-05	0.000119521	0.000113801	7.10355e-05	0.000132232	3.18345e-05	1.51586e-05	1.98492e-05	9.63098e-05	0.000114708	0.000134939	0.00041636	0.000101771	0.000441231	0.000143475	0.000372093	0.000196642	0.000368185	0.000560488
Otu1794	0	0	0	0	0	0	0	0	0	0	0	0	0	0	0	0	0	0	0	0	0	0	0	0	0	4.67347e-06	0	0	9.91483e-06	0	0	0	0	0	0	9.09558e-06	0	0	0	0	0	0	0	0	0	0	4.79614e-06	0	0
Otu227	0.000152849	3.38848e-05	2.85968e-05	2.32037e-05	7.19314e-05	2.98882e-05	0.00059522	8.78268e-05	0.000107259	3.31181e-05	0.000444655	0.000160399	0.00013871	0.000124856	0.00159645	0.000467731	0.0010328	0.000137171	0.00012999	0.000115703	7.57641e-05	6.86819e-05	0	5.11015e-06	4.25973e-05	2.80408e-05	4.47852e-06	1.48595e-05	3.96593e-05	0	9.93083e-05	0.000119521	0.000113801	7.10355e-05	0.000132232	2.2739e-05	1.51586e-05	1.98492e-05	9.63098e-05	0.000114708	0.000134939	0.00041636	0.000101771	0.000441231	0.000143475	0.000372093	0.000191846	0.000368185	0.000560488
Otu412434	0	0	0	0	0	0	0	0	0	0	0	0	0	0	0	0	0	0	0	0	0	0	0	0	0	0	0	0	0	0	0	0	0	0	0	0	0	0	0	0	0	0	0	0	0	0	0	0	0
Lactobacillaceae	0.357292	0.214051	0.131988	0.503947	0.249127	0.270035	0.411613	0.383974	0.259729	0.202025	0.47967	0.578749	0.660157	0.579415	0.523166	0.787655	0.371158	0.186054	0.671797	0.49452	0.282302	0.222076	0.437494	0.226032	0.350358	0.531275	0.29431	0.593711	0.531732	0.408911	0.561807	0.788868	0.328943	0.234919	0.231788	0.145698	0.117009	0.264977	0.326906	0.291536	0.387875	0.587795	0.57484	0.908513	0.486092	0.627585	0.422972	0.475271	0.44602
Lactobacillus	0.357162	0.212734	0.131984	0.503947	0.249127	0.270025	0.411285	0.383969	0.259337	0.201949	0.479612	0.578741	0.660101	0.579415	0.52314	0.787655	0.371154	0.186049	0.671585	0.494453	0.282282	0.222072	0.437489	0.226032	0.350353	0.531223	0.29431	0.593702	0.531361	0.408911	0.561802	0.788868	0.328933	0.224292	0.231788	0.14537	0.116867	0.264977	0.326896	0.291522	0.385771	0.587269	0.574835	0.908409	0.485132	0.627555	0.422962	0.475266	0.44602
Otu1017	0	0	4.76613e-06	0	1.91817e-05	9.96274e-06	2.38088e-05	4.16021e-05	4.66342e-06	1.89246e-05	4.88632e-06	0	9.24731e-06	0	4.42229e-06	1.78183e-05	0	1.01608e-05	4.333e-06	8.90024e-06	0	2.74728e-05	0	5.11015e-06	0	4.67347e-06	0	1.48595e-05	3.47019e-05	4.8144e-06	2.48271e-05	2.39042e-05	0	0	5.08585e-06	1.36434e-05	0	9.92462e-06	0	4.77952e-06	9.9955e-06	9.15076e-06	4.84623e-06	5.6933e-05	0	1.50849e-05	0	4.66057e-06	0
Otu1022	4.6318e-06	0	0	0	0	0	5.9522e-06	0.000799686	4.66342e-06	0	4.88632e-06	8.67021e-06	1.3871e-05	0	0	4.45458e-06	0	0	0	4.45012e-06	0	0	4.93029e-06	0	0	0	0	0	4.95742e-06	4.8144e-06	0	0	0	0	0	0	5.05285e-06	0	0	0	0	0	4.84623e-06	9.48884e-06	0	0	4.79614e-06	4.66057e-06	0
Otu1027	0	0	0	0	0	4.98137e-06	0	3.69797e-05	0	0	0	0	0	0	0	4.45458e-06	0	0	4.333e-06	0	0	0	0	0	0	0	0	0	7.43612e-05	0	0	0	0	0	0	1.81912e-05	0	0	0	4.77952e-06	4.99775e-06	4.57538e-06	0	1.89777e-05	1.34507e-05	0	0	0	0
Otu1034	0	0	0	0	0	0	0	0	0	0	0	0	0	0	0	0	0	0	0	0	0	0	0	0	0	0	0	0	0	4.8144e-06	0	4.78085e-06	0	0	0	0	0	0	0	0	0	0	0	0	0	0	0	0	0
Otu10505	0	0	0	0	0	0	0	0	0	0	0	0	0	0	0	0	0	0	0	0	0	0	0	0	0	0	0	0	0	3.37008e-05	0	0	0.000407788	0	0	0	0	0	0	0	0	0	0	0	0	0	0	0	0
Otu1058	1.38954e-05	0	9.53225e-06	9.28147e-06	4.79543e-06	9.96274e-06	0	0	0	4.73115e-06	0	4.3351e-06	0	4.6243e-06	1.76892e-05	3.11821e-05	0	5.0804e-06	8.666e-06	5.34014e-05	0	3.20516e-05	1.97211e-05	0	2.36652e-05	6.54285e-05	4.47852e-06	4.95317e-06	1.48722e-05	0	1.98617e-05	4.78085e-06	0	4.7357e-06	5.08585e-06	9.09558e-06	1.01057e-05	0	1.01379e-05	9.55904e-06	0	1.37261e-05	2.90774e-05	0.000218243	5.3803e-05	0	1.91846e-05	1.86423e-05	0
Otu106601	0	0	0	0	0	9.96274e-05	0	0	0	0	0	0	0	0	0	0	0	0	0	0	0	0	0	0	0	0	0	0	0	0	0	0	0	0	0	0	0	0	0	0	0	0	4.84623e-06	0	0	0	0	0	0
Otu107963	0	0	0	0	0	0	0.000113092	0	0	0	0	0	0	0	0	4.45458e-06	0	0	0	0	0	0	4.93029e-06	0	0	4.67347e-06	0	0	0	0	0	4.78085e-06	0	0	0	0	0	0	0	0	0	0	0	0	0	0	0	0	4.74989e-06
Otu10861	0	0	0	0	0	0	0	0	0	0	0	0	0	0	7.5179e-05	0	0	0	0	0	0	0	0	5.11015e-06	0	0	0	4.95317e-06	0	0	0	0	0	0	0	0	0	0	5.06894e-06	0	0	4.57538e-06	0	4.74442e-06	0	0	0	0	0
Otu11	0	0	0	0	1.91817e-05	5.97764e-05	0	1.84898e-05	7.92781e-05	0.001883	6.35222e-05	1.73404e-05	5.08602e-05	9.2486e-06	4.42229e-06	2.67275e-05	1.38322e-05	0.00136155	2.5998e-05	4.45012e-06	3.03056e-05	0	0.000221863	0.00309164	1.41991e-05	0.00999654	0.0130011	0.0010897	0.00652892	0.191132	0.0260486	0.230427	0.169901	4.7357e-06	5.08585e-06	0	0	9.92462e-06	3.04136e-05	5.73542e-05	4.99775e-06	0.000269948	1.93849e-05	9.48884e-06	2.69015e-05	2.01131e-05	7.67382e-05	4.66057e-06	1.42497e-05
Otu110763	0	0	0	4.64074e-06	0	0	0	0	0	0	0	2.16755e-05	0	9.2486e-06	0	0	0	0	0	0	0	0	0	0	4.73303e-06	0	0	0	0	0	0	0	0	0	0	0	0	0	0	4.77952e-06	4.99775e-06	4.57538e-06	4.84623e-06	0	0	0	4.79614e-06	0	0
Otu113575	0	0	0	0	0	0	0.000708312	0	0	0	0	0	0	0	0	4.45458e-06	0	0	0	0	0	0	0	0	0	0	0	0	0	0	0	0	0	0	0	0	0	0	0	0	0	0	0	0	0	0	0	0	0
Otu1166	0	0	0	0	0	0	0	0	0	0	0	0	0	0	0	0	0	0	0	0	0	0	0	5.11015e-06	0	0	0	0	0	0.000105917	4.96542e-06	4.78085e-06	2.37086e-05	0	0	0	0	0	0	0	0	0	0	0	0	0	0	0	0
Otu117930	0	0	0	0	0	0	0	0	0	0	4.88632e-06	0	0	0	0	0	0	0	0	0	0	0	0	0	0.000833014	0	0	9.90634e-06	0	0	0	0	0	0	0	0	0	0	0	0	0	0	0	0	0	0	0	0	0
Otu1216	0	0	0	0	0	0	0	0	0	0	0	0	0	0	0	0	0	0	0	0	0	0	0	0	0	0	1.34356e-05	0	0	3.85152e-05	2.48271e-05	0.000138645	5.21589e-05	0	0	0	0	0	0	0	0	0	0	0	0	0	0	0	0
Otu122	4.6318e-06	1.45221e-05	0	5.56888e-05	4.79543e-06	0	0	0	1.86537e-05	9.4623e-06	9.77264e-06	1.30053e-05	4.16129e-05	1.38729e-05	1.76892e-05	0.000102455	3.68857e-05	5.58844e-05	2.5998e-05	1.78005e-05	0	0	2.46514e-05	0	8.51946e-05	9.81428e-05	4.47852e-05	0.000158501	5.45316e-05	2.4072e-05	0.0047668	0.0170437	0.0129496	4.7357e-06	5.08585e-06	4.54779e-06	0	4.96231e-06	2.02758e-05	3.34566e-05	1.49933e-05	5.948e-05	4.84623e-05	0.000128099	1.34507e-05	8.54808e-05	0	6.05874e-05	1.42497e-05
Otu1220	0	0	0	0	0	0	0	0	0	0	0	0	0	0	0	0	0	0	0	0	0	0	0	2.04406e-05	0	4.67347e-06	0	0	0	0	0	4.78085e-06	0	0	0	0	0	0	0	0	0	0	0	0	0	0	0	0	0
Otu123570	4.6318e-06	0	0	0	0	0	0	7.39594e-05	0	0	0	4.3351e-06	0	0	0	0	0	0	0	0	0	0	0	0	0	0	0	0	0	0	0	0	0	0	0	0	0	0	0	0	0	0	0	0	8.96716e-06	0	0	0	4.74989e-06
Otu124	4.6318e-06	0	0	9.28147e-06	0	9.96274e-06	0	2.77348e-05	9.32684e-06	0.000359568	0	0	0	0	0	0	0	0	0	0	0	0	0	0	0	0	0	0	0	0	0	0	0	0	0	0	0	0	0	0	0.00203408	0	0	4.74442e-06	0	0	0	0	0
Otu128263	0	0	0	0	0	9.96274e-06	0	4.62246e-06	0	4.73115e-06	0	0	0	0	0	0	9.22143e-06	0	0	4.45012e-06	0	0	0	0	0	0	0	0	0	0	0	0	0	0	0	0	0	0	0	0	0	0	0	0	4.48358e-06	5.02828e-06	0	4.66057e-06	0
Otu133125	0	0	0	0	0	0	0	0	0	0	0	0	0	6.47402e-05	0	0	3.2275e-05	0	0	0	0	0	0	0	0	0	0	4.95317e-06	0	0	0	0	0	0	0	0	0	0	0	0	0	0	0	0	0	0	0	0	0
Otu135623	0	0	0	0	0	4.48323e-05	5.9522e-06	0	0	0	0	0	0	0	0	0	4.61072e-06	0	0	8.90024e-06	0	0	0	0	0	0	0	0	0	0	0	0	0	0	0	0	0	0	0	0	0	0	0	0	0	0	0	0.000442754	0
Otu135694	0	0	0	0	0	0	0	0	0	0	0	0	0	0	0	0	0	0	0	0	0	0	0	0	0	0	0	0	0	0	0	0	0	0	0	0	5.05285e-06	0	0	0	0	0	0	0	0	0	0	0	6.64985e-05
Otu136899	9.26359e-06	0	4.76613e-06	0	0	0	5.9522e-06	0	0	4.73115e-06	0	1.30053e-05	0	9.2486e-06	1.32669e-05	0	2.30536e-05	0	4.333e-06	0	0	0	9.86057e-06	0	4.73303e-06	0	0	0	0	0	0	1.43425e-05	0	0	0	0	5.05285e-06	0	5.06894e-06	0	4.99775e-06	4.57538e-06	9.20784e-05	4.74442e-06	4.48358e-06	1.50849e-05	0	4.66057e-06	0
Otu137089	0	0	0	0	0	0	0	0	0	0	0	0	0	0	0	4.45458e-06	0	0	0	0	0	0	0	0	0	0	0	0	0	0	0	0	0	0	0	0	0	0	0	0	0	0	0	0	0	0	0	0	0
Otu140514	0	0	0	0	0	0	0	0	0	0	0	0.00138723	0	0	0	0	0	0	0	0	0	0	0	0	0	0	0	0	0	0	0	0	0	0	0	0	0	0	0	0	0	0	0	0	0	0	4.79614e-06	0	0
Otu1416	0	0	0	0	0	0	0	0	0	0	0	0	0	0	0	0	0	0	0	0	0	0	0	0	0	0	0	0	0	0	0	0	5.69006e-05	0	0	0	0	0	0	0	0	0	0	0	0	0	0	0	0
Otu14183	9.26359e-06	4.84069e-06	0	9.28147e-06	3.83634e-05	9.96274e-06	2.38088e-05	4.62246e-06	1.86537e-05	4.73115e-06	0	2.60106e-05	0.000129462	0.000120232	2.21115e-05	4.45458e-05	2.76643e-05	5.0804e-06	8.666e-06	0	1.51528e-05	1.83152e-05	4.93029e-06	0	4.73303e-06	1.86939e-05	1.34356e-05	4.95317e-06	0	4.8144e-06	2.48271e-05	2.39042e-05	4.74172e-06	4.7357e-06	5.08585e-06	0	3.537e-05	2.48116e-05	2.02758e-05	1.91181e-05	3.9982e-05	3.66031e-05	0.000116309	0.000123355	2.69015e-05	5.02828e-05	9.59228e-06	1.39817e-05	1.89996e-05
Otu14189	0	0	0	0	0	0	0	0	0	0	0	0	0	0	0	0	0	0	0	0	0	0	0	5.11015e-06	0	0	1.79141e-05	0	0	0	0	0.000152987	5.21589e-05	0	0	0	0	0	0	0	0	0	0	0	0	0	0	0	0
Otu14593	0	0	0	0	0	0	0	0	0	0	0	0	0	0	0	0	0	0	0	0	0	0	0	0	0	0	0	0	0	0	0	0	0.000417271	0	0	0	0	0	0	0	0	0	0	0	0	0	0	0	0
Otu149227	0	0	0	0	0	0	0	0	0	0	0	4.3351e-06	0	0	0	0	0	0	0	0	0	0	0	0	0	0.00105153	0	0	0	0	0	0	0	0	0	0	0	0	0	0	0	0	0	0	0	0	0	0	0
Otu15042	0	0	0	0	0	0	0	0	0	0	0	0	4.62366e-06	0	8.84459e-06	4.45458e-06	0	0	0	0	0	0	0	0	0	0	0	5.9438e-05	0	0	0	0	0	0	0	0	0	0	0	0	0	0	0	0	0	0	0	0	0
Otu151103	0	0	0	0	0	0	0	0	0	0	0	0	0	0	4.42229e-06	0	0	0	0	0	0	0	0	0	0	0	0	0	0	0	0	0	0	0	0	0	0	0	0	0	0	0	0	0	0	0	0	0	0
Otu153459	4.6318e-06	0	0	4.64074e-06	0	2.49068e-05	0	4.62246e-06	0	0	4.88632e-06	0	0	3.23701e-05	8.84459e-06	8.90916e-06	2.30536e-05	0	8.666e-06	0	0	0	1.47909e-05	0	9.46607e-06	0	0	0	0	9.62881e-06	0	9.56169e-06	2.37086e-05	0	0	4.54779e-06	0	0	5.06894e-06	9.55904e-06	4.99775e-05	0	4.84623e-06	9.48884e-06	8.96716e-06	0	0	0	9.49979e-06
Otu153725	0	0	0	0	0	0	0	0	0	0	0	0	0	0	0	0	0	0	7.7994e-05	0	0	0	0	0	0	0	0	0	0	0	0	0	0	0	0	0	0	0	0	0	0	0	0	0	0	0	0	0	0
Otu154237	0	0	0	0	0	9.96274e-06	0	0	0	0	0	0	0	0	0	0	0	0	0	0	0	0	0	0	0	0	0	0	0	0	0	0	0	0	0	0	0	0	0	0	0	0	0	0	0	0	0	0	0
Otu15437	9.26359e-06	0	0	1.39222e-05	4.79543e-06	4.98137e-06	1.19044e-05	9.24492e-06	4.66342e-06	4.73115e-06	4.88632e-06	5.20212e-05	4.62366e-06	0	0	4.45458e-06	4.61072e-06	0	3.4664e-05	0	5.05094e-06	0	0	5.11015e-06	0	4.67347e-06	0	0	1.98297e-05	0	0	4.78085e-06	0	0	0	0	0	0	1.01379e-05	0	0	9.15076e-06	0	9.48884e-06	2.69015e-05	1.00566e-05	4.79614e-06	0	0
Otu15687	0	0	0	0	0	0	0	0	0	0	0	0	0	0	0	0	0	0	0	0	0	0	0	0	0	0	0	0	0	4.8144e-06	0.00011917	2.39042e-05	6.16423e-05	0	0	0	0	0	0	0	0	0	0	0	0	0	0	0	0
Otu157908	0.000254749	0	0	0	0	0	0	0	0	0	0	4.3351e-06	0	0	0	0	0	0	0	0	0	0	0	0	0	0	0	0	0	0	0	0	0	0	0	0	0	0	0	4.77952e-06	0	0	0	0	4.48358e-06	5.02828e-06	0	0	0
Otu16020	0	0	0	0	0	0	0	0	0	0	0	0	0	0	0	0	0	0	0	0	0	0	0	0	0	0	0	0	0	0	0	0	0	0	0	0	0	0	0	0	0	0	0	0	0	0	0	0	0
Otu161732	0	0	0	0	0	0	0	0.000818176	0	0	0	0	0	0	0	0	0	0	0	0	0	4.5788e-06	0	0	0	0	0	0	0	0	0	0	0	4.7357e-06	0	0	0	0	0	0	0	0	0	0	0	0	0	0	0
Otu16174	0	0	0	0	0	0	0	0	0	0	0	0	0	0	0	0	0	0	0	0	0	0	0	0	0	0	0	0	0	0	0	0	0	0	0	0	0	0	0	0	0	0	0	0	0	0	0	0	0
Otu164344	0	0	0	0	0	0	5.9522e-06	4.62246e-06	0	0	4.88632e-06	8.67021e-06	4.62366e-06	0	0	4.45458e-06	0	0	0	0	0	4.5788e-06	0	0	0	0	0	0	0	4.8144e-06	4.96542e-06	0	0	0	0	0	2.02114e-05	0.000104209	0	0	0	0	0	4.74442e-06	0	0	0	0	0
Otu165490	0	4.84069e-06	0	0	0	5.97764e-05	0	0	0	0	0	0	0	0	0	0	0	0	0	0	0	0	0	0	0	0	0	0	0	0	0	0	0	4.7357e-06	0	0	0	0	0	0	0	0	0	0	0	0	0	0	0
Otu166278	0	0	0	0	0	0	0	0	0	0	0	0	0	0	0	0	0	0	0	0	0	0	0	0	0	0	0	0	0	1.92576e-05	4.96542e-06	4.78085e-06	1.42252e-05	0	0	0	0	0	0	0	0	0	0	0	0	0	0	0	0
Otu166527	0	0	0	0	0	0	0	0	0	0	0	0	0	9.2486e-06	0	0	0	0	0	0	0	0	0	0	0	0	0	0	0	0	0	0	0	0	0	0	0	0	0	0	0	0	0	5.21886e-05	0	0	0	0	0
Otu166594	0	0	0	0	0	0	0	4.16021e-05	0	0	0	0	4.62366e-06	0	4.42229e-06	8.90916e-06	9.22143e-06	0	1.7332e-05	0	0	0	0	0	4.73303e-06	0	0	0	0	0	0	0	0	0	5.08585e-06	0	0	0	0	4.77952e-06	0	0	0	3.32109e-05	4.48358e-06	5.02828e-06	9.59228e-06	5.12663e-05	0
Otu166739	0	0	0	0	0	0	0	0	0	0	0	0	0	0	0	0	0	0	0	0	0	0	0	0	0	0	0	0	0	0	0	0	0	0	0	0	0	0	0	0	0	0	9.69246e-06	0	0	0	0	0	0
Otu172856	0	0	0	0	0	0	5.9522e-06	0	0	0	0	0	0	0	0	0	0	0.00013209	0	0	0	0	0	0	0	0	0	0	0	0	0	0	0	0	0	0	0	0	0	0	0	0	0	0	0	0	0	0	0
Otu1742	0	0	0	4.64074e-06	0	0	0	0	0	0	0	0	0	0	1.76892e-05	0	0	0	0	0	0	0	0.000414144	0	0	0	0	0	0	0	0	0	0	2.84142e-05	1.01717e-05	0	0	0	0	0	0	0	0	0	4.48358e-06	0	4.79614e-06	0	0
Otu177840	0	0	0	0	0	0	0	0	0	0	0	0	0	0	0	0	0	0	0	0	0	0	0	0	0	0	0	0	0	0	0	0	0	0	0	0	0	0	0	0	0	0	0	0	0	6.53677e-05	0	0	0
Otu177896	4.6318e-06	0	0	0	0	0	0	0	0	0	0	4.3351e-06	4.62366e-06	4.6243e-06	0	0	0	0	0	0	0	0	0	0	0	0	0	4.95317e-06	0	0	0	0	0	0	0	0	0	4.96231e-06	0	0	0	0	0	4.74442e-06	0	0	0	0	0
Otu178387	0	0	0	0	0	0	0	0	0	0	0	0	0	0	0	0	0	0	0	0	2.02038e-05	0.000508246	0	0	0	0	0	0	0	0	0	0	0	0	0	0	0	0	0	0	0	0	0	0	0	0	0	4.66057e-06	2.37495e-05
Otu178458	0	0	0	0	0	0	0	0	0	0	0	0	0	0	0	0	0	0	0	0	0	0	0	0	0	1.40204e-05	6.26993e-05	0	0	0	0	0	4.74172e-06	0	0	0	0	0	0	0	0	0	0	0	0	0	0	0	0
Otu178869	0	0	0	0	0	0	0	0	0	0	0	0	0	0	0	0	0	0	1.7332e-05	0	0	0	0	0	0	0	0	0	0.00103114	0	0	0	0	0	0	0	0	0	0	0	0	0	0	0	0	0	0	0	0
Otu185149	0	0.000392096	0	0	0	0	0	4.62246e-06	0	0	0	0	0	0	4.42229e-06	0	0	0	0	0	0	0	0	0	0	0	0	0	0	0	0	0	0	0	0	0	0	0	0	0	0	0	0	1.42333e-05	0	0	4.79614e-06	0	0
Otu187123	0	0	0	0	0	0	0	0	0	0	0	0	0	0	0	0	0	0	0	0	5.05094e-06	0	0	0	0	0	0	0	0	0	0	0	0	0	0	0	0	0	0	0	0	0	0	0	0	0	0	0	0
Otu18781	0	0	0	0	0	0	0	0	0	0	0	0	0	0	0	0	0	0	0	0	0	0	0	0	0	0	0	0	0	0	0	0	6.16423e-05	0	0	0	0	0	0	0	0	0	0	0	0	0	0	0	0
Otu188501	0	0	0	0	0	0	0	0	0	0	0	0	0	0	0	0	0	0	0	0	0	0	0	5.11015e-06	0	0	0	0	0	0	0	0	4.74172e-06	0	0	0	0	0	0	0	0	0	0	0	0	0	0	0	4.74989e-06
Otu1908	0	0	0	0	0	0	0	0	0	0	0	0	0	0	0	0	0	0	0	0	0	0	0	0	0	0	0	0	0	0	0	0	0	0	0	0	0	0	0	0	0	0	0	0	0	0	0	0	0
Otu191293	0	9.68139e-06	1.42984e-05	6.03296e-05	4.79543e-06	0	0	9.24492e-06	4.66342e-06	0	9.77264e-06	2.16755e-05	9.24731e-06	2.31215e-05	4.42229e-06	1.78183e-05	4.61072e-06	5.0804e-06	4.333e-05	0	2.52547e-05	0	4.93029e-06	0	1.41991e-05	2.33673e-05	2.68711e-05	4.95317e-06	3.96593e-05	0	0	2.86851e-05	0	0	0	0	5.05285e-06	9.92462e-06	5.06894e-06	4.77952e-06	2.99865e-05	3.20277e-05	1.45387e-05	2.37221e-05	1.34507e-05	0	1.91846e-05	2.79634e-05	4.74989e-06
Otu191339	0	0	0	0	9.59085e-05	0	0	4.62246e-06	0	0	0	2.16755e-05	0	0	0	0	0	0	4.333e-06	0	0	0	0	0	0	0	0	0	0	0	0	1.91234e-05	0	0	0	0	0	0	0	0	0	0	0	9.48884e-06	0	0	0	0	0
Otu191376	0	0	0	0	0	0	0	0	0	0	0	0	0	0	0	4.45458e-06	0	0	0	0	0	0	0	0	0	0	0	0	0	0	4.96542e-06	0	0	0	0	0	0	0	0	0	0	0	0	0	0	0	0	0	0
Otu192165	0	0	0	0	0	0	0	0	0	0	0	0	0	0	0	0	0	0	0	0	0	0	0	0	0	0	0	0	0	0	9.93083e-06	0	0	0	0	0	0	0	0	0	0	0	0	0	0	0	0	0	0
Otu192210	0	0	0	0	9.59085e-06	0	0	0	4.66342e-06	0	1.95453e-05	0	9.24731e-06	0	0	4.45458e-06	0	2.5402e-05	0	0	0	4.5788e-06	0	0	4.73303e-06	0	0	4.95317e-06	1.48722e-05	0	0	0	0.000336662	0	0	0	0	0	0	0	0	0	9.69246e-06	0	0	5.02828e-06	0	1.86423e-05	0
Otu192653	0	0	0	0	0	0	0	0	0	0	0	0	2.31183e-05	0	0	4.45458e-06	0	0	0	0	0	4.5788e-06	0	0	0	0	0	0	0	0	0	0	0	0	0	0	0	0	0	0	0	0	0	9.48884e-06	0	0	0	0	0
Otu192954	0	0	0	0	0	0	0	0	0	0	0	0	0	6.93645e-05	0	0	0	0	0	0	0	0	0	0	9.46607e-06	0	0	0	0	0	0	0	0	0	0	0	0	0	0	4.77952e-06	0	0	0	0	0	0	0	4.66057e-06	0
Otu19581	0	0	0	0	0	0	0	0	0	0	0	0	0	0	0	0	0	0	0	0	0	0	0	0	0	0	0	0	0	0	0	0	0	0	0	0	0	0	0	0	0	0	0	0	0	0	0	0	0
Otu19628	0	0	0	0	0	0	0	0	0	0	0	0	0	0	0	0	0	0	0	0	0	0	0	0	0	0	0	0	0	0	0	0	0	0	0	0	0	0	0	0	0	0	0	0	0	0	0	0	0
Otu19670	0	0	0	0	0	0	0	0	0	0	0	0	0	0	0	0	0	0	0	0	0	0	0	0	0	0	0	0	0	0	0	0	0	0	0	0	0	0	0	0	0	0	0	0	0	0	0	0	0
Otu197474	0	0	0	0	0	0	0	0	0	0	0	0	0	0	0	0	0	0	0	0	0	0	0	0	0	0	0	0	0	0	0	0	0	0	0	0	0	0	0	0	0	0	0	0	0	0.00134255	0	0	0
Otu2	0.356213	0.211795	0.131273	0.502137	0.247866	0.267858	0.409256	0.380678	0.258032	0.198775	0.47753	0.574856	0.657054	0.576636	0.522056	0.783436	0.369286	0.183382	0.668222	0.492562	0.2806	0.221096	0.435862	0.221929	0.34864	0.518544	0.279558	0.587867	0.520677	0.215406	0.528345	0.538223	0.140104	0.22298	0.230282	0.144838	0.11618	0.26333	0.322947	0.289988	0.35631	0.584336	0.572	0.90384	0.483908	0.624402	0.421705	0.472661	0.44364
Otu203155	0	0	0	0	0	0	0	0	0	0	0	0	0	0	0	0	0	0	4.333e-06	0	0	0	0	0	0	0	0	0.000515129	0	0	0	0	0	0	0	0	0	0	0	0	0	0	0	0	0	0	0	0	0
Otu203962	0	0	0	0	0	4.98137e-06	0	0	0	0	4.88632e-06	0	0	0	4.42229e-06	0	0	0	0	4.45012e-06	0	4.5788e-06	4.93029e-06	0	4.73303e-06	0	0	0	0	0	0	0	0	0	0.000493327	0	0	0	0	0	0	2.74523e-05	0	1.42333e-05	0	5.02828e-06	1.91846e-05	0	0
Otu204046	0	0	0	0	0	0	0	0	0	0	0	0	0	0	0	0	0	0	0	4.45012e-06	0	0	0	0	0	0	0	0	0	0	0	0	0	0	0	0	0	0	0	0	0	0	0	5.21886e-05	0	0	0	0	0
Otu205	0	0	0	0	0	0	0	0	0	0	0	0	0	0	0	0	0	0	0	4.45012e-06	0	0	0	0	0	0	0	0	0	0	0	0	0	0	0	0	0	4.96231e-06	5.06894e-06	0	0.0247239	0	4.84623e-06	4.26998e-05	0	1.00566e-05	0	0	0
Otu2055	0	0	0	0	0	0	0	0	0	0	0	1.73404e-05	0	0	0	8.90916e-06	0	0	0	0	5.05094e-06	0	0	0	0	0	0	0	0	0	0	0	0	0	0	0	0	0	0	0	0	0	0	0	0	0	0	0	0
Otu2065	0	0	0	0	0	0	5.9522e-06	0	0	0	0	0	0	0	0	0.000668187	0	2.5402e-05	0	0	5.05094e-05	0	4.93029e-06	4.59913e-05	0	0	0	1.48595e-05	0	0	0	0	0	4.7357e-06	0	0	0	0	0	0	0	0	0	0	0	0	0	0	0
Otu206789	0	0	0	0	0	0	0	0	0	0	9.77264e-06	0	0	0	0	0	0	0	1.7332e-05	0	0	0	0	0	0	0	0	0	0	0	0	0	0	0	0	0	0	0	0	4.77952e-06	0	0	0	0	0	0	0	0	4.74989e-06
Otu208352	0	0	0	0	0	9.96274e-06	0	0	0	0	0	4.3351e-06	0	0	0	0	0	0	0	0	0	0	0	0	4.73303e-06	0	0	0	0	0	0	0	0	0	0	0	0	0	0	0	0	0	0	8.06551e-05	0	0	0	0	0
Otu217470	6.02133e-05	0	0	0	4.79543e-06	0	0	0	0	0	0	0	0	0	0	0	0	0	0	0	0	0	0	0	0	0	0	0	0	0	0	0	0	0	0	0	0	0	0	0	0	0	0	0	0	0	4.79614e-06	0	0
Otu220683	0	0	0	0	0	0	0	0	0	0	0	0	0	0	0	0	0	0	0	0	0	0	0	5.11015e-06	0	0	0	0	0	0	0	0	0	0	0	0	0	0	0	0	0	0	0	0	0	0	0	0	0
Otu222600	0	0	0	0	0	0	0	4.62246e-06	4.66342e-06	0	0	0	0	0	0	4.45458e-06	0	0	0	1.33504e-05	0	0	0	0	0	0	0	4.95317e-06	9.91483e-06	0	9.93083e-06	0	0	0	0	0	0	1.98492e-05	0	0	0	0	0	0	4.48358e-06	0	0	0	0
Otu223525	0	0	0	0.000222755	0	0	0	0	0	0	0	0	0	0	0	0	0	0	0	0	0	0	0	0	0	0	0	0	0	0	0	0	0	0	0	0	0	0	0	0	0	0	0	4.74442e-06	0	0	0	0	0
Otu22802	0	0	0	0	0	0	0	0	0	0	0	0	0	0	0	0	0	0	0	0	0	0	0	0	0	0	0	0	0	0	0	0	0	0	0	0	0	0	0	0	0	0	0	0	0	0	0	0	0
Otu229383	0	4.84069e-06	0	0.000185629	0	0	0	0	0	0	4.88632e-06	0	0	0	0	0	0	0	0	4.45012e-06	5.05094e-06	0	0	0	0	0	0	4.95317e-06	0	0	0	0	0	0	0	0	0	0	0	0	0	0	0	0	0	0	0	0	0
Otu229761	0	0	0	0	0	0	0	0	0	0	0	0	0	0	0	0	0	0	0	0	0	0	0	0	0	0	0	0	0	0	0.000427026	0	0	0	0	0	0	0	5.06894e-06	0	0	0	0	4.74442e-06	0	0	0	0	0
Otu230440	0	0	0	0	0	0	0	0	0	0	0	0	0	0	0	0	0	0	4.333e-06	0	0	0	0	0	0	0	0	0	0	0	0	0	0	0	0	0	0	0	0	0	0	0.00129026	0	0	0	0	0	0	0
Otu241416	0	0	0	0	0	0	0	0	0	0	0	0	0	0	0	5.79096e-05	0	0	0	4.45012e-06	0	0	0	0	0	0	0	0	0	0	0	0	0	0	0	0	0	0	0	0	0	0	0	0	0	0	0	0	0
Otu241730	0	0	0	0	0	0	0	0	0	0	0	0	0	0	0	0	0	0	0	0	0	0	0	0	0	4.67347e-06	0	0	0	0	0	0	0	0	0	0	0.00031833	0	0	0	0	0	0	0	0	0	0	0	0
Otu242733	0	0	0	0	0	0	0	0	0	0	0	0	0	0	0	0	0	0	0	4.45012e-06	0	0	0	0	0	0	0	0	0	0	0	0	0	0	0	0	0	0	0	0	0	0	0	0	0	0	0	0	0
Otu251189	0	0	0	0	0	0	0	0	0	0	0	0	0	4.6243e-06	0	0	0	0	0	0	0	0	0	0	0	0	0	0	0	0	0	0	0	0	0	0	0	0	0	0	4.99775e-06	0	0	0	0	0	0	0	0
Otu255229	0	4.84069e-06	0	0	0	0	0	0	0	0	0	0	0	0	0	0	0	0	0	0	0	0	4.93029e-06	0	0	0	0	0	0	0	0	0	0	0	0	0	0	0	0	0	0	0	0	7.11663e-05	0	0	0	0	0
Otu257007	0	0	0	0	0	0	0	0	0	0	0	0	0	0	0	0	0	0	0	0	0	0	0	0	0	0	0	0	0	0	0	0	4.74172e-06	0	0	0	0	0	0	0	0	0	0	0	0	0	0	0	0
Otu257050	0	0	0	0	0	0	0	0	0	0	0	0	0	0	0	0	0	0	0	0	0	0	0	0	0	0	0	0	0	0	0	1.43425e-05	0	0	5.08585e-06	0	0	0	0	0	0	0	0	0	0	0	8.63305e-05	0	0
Otu257167	0	0	0	0	0	0	0	9.24492e-06	0	0	0	0	0	0	0	0	0	5.0804e-06	0	0	0	0	0	0	0	0	0	0	0	0	0	0	0	0	0	0	0	0	0	0	0	0	0	0	0	0	0	0	0
Otu262676	0	0	0	0	0	0	0	0	0	0	0	0	0	0	0	0	0	0	0	0	0	0	0	0	4.73303e-06	0	0	0	0	0	0	0	0	0	0	0	0	0	0	0	0	0	0	0	0	0	0	0	0
Otu262829	0	0	0	0	0	0	0	0	0	0	0	0	0	0	0	0	0	0	0	0	0	0	0	0	0	0	0	0	0	0	0	0	0	0	0	0	0	0	0	0	0	0	0	0	4.48358e-06	0	9.11267e-05	0	0
Otu265199	0	0	0	0	0	0	0	0	0	0	0	4.3351e-06	0	0	0	0	0	0	0	0	0	0	0	0	0	0	0	0	0	0	0	0	0	0	0	0	0	0	0	0	0	0	0	0	0	0	0	0	0
Otu267	0	0	0	1.39222e-05	4.79543e-06	0	0	0	0	9.4623e-06	4.88632e-06	0	9.24731e-06	0	0	4.45458e-06	0	5.58844e-05	4.333e-06	0	0	0	0	0	4.73303e-06	0.000163571	0	4.95317e-06	1.98297e-05	0	0	4.78085e-06	0	0	0	4.09301e-05	0	0	0	0	9.9955e-06	4.57538e-06	0	0	0	5.02828e-06	0	4.66057e-06	0.000104498
Otu267457	0	0	0	0	0	0	0	0	0	0	0	0	0	0	0	0	0	0	0	0	0	0	0	0	0	0	0	0	0	0	0	0	0	1.42071e-05	0	0	0	0	0	0	0	0	0	0	0	0	0	0	0
Otu268098	0	0	0	0	0	0.000627653	0	0	0	0	0	0	0	0	0	0	0	0	0	0	0	0	0	0	0	0	0	0	0	0	0	0	0	0	0	0	0	0	0	0	0	0	0	0	0	0	0	0	0
Otu26890	0	0	0	0	0	0	0	0	0	0	0	0	9.24731e-06	0	0	0	0	0	0	3.5601e-05	0	0	4.93029e-06	0	0	0	0	0	0	0	0	9.56169e-06	0	0	0	0	0	0	0	0	0	0	0	0	0	2.51414e-05	0	0	0
Otu276334	0	0	0	0	0	0	0	0	0	0	0	0	0	0	4.42229e-06	0	0	0	0.000875266	0	0	0	0	0	0	0	0	0	0	0	0	0	0	0	0	0	0	0	0	0	0	0	0	0	4.48358e-06	0	0	0	0
Otu281635	2.3159e-05	1.93628e-05	0	0	0	9.96274e-06	5.9522e-06	0	0	1.89246e-05	9.77264e-06	4.3351e-06	0	4.6243e-06	0	0	9.22143e-06	0	4.333e-06	4.45012e-06	5.05094e-06	0	0	5.11015e-06	0	0	8.95704e-06	0	0	0	0	0	0	9.4714e-06	0	0	0	9.92462e-06	0	0	0	0	0	0	4.48358e-06	0	0	1.39817e-05	0.000987978
Otu28254	0	0	0	0	0	0	0	0	0	0	0	0	0.000439247	0	0	0	0	0	0	0	0	0	0	0	0	0	0	0	0	0	0	0	0	0	0	0	0	0	0	0	0	4.57538e-06	0	4.74442e-06	0	0	0	0	0
Otu28567	0	0	0	0	0	0	0	0	0	0	0	0	0	0	4.42229e-06	0	0	0	0	0	0	0	0	0	0	4.67347e-06	0	4.95317e-06	0	0	0	0	0	0	0	0	0	0	0	0	0	0	0	5.21886e-05	0	0	0	4.66057e-06	0
Otu296510	0	0	0	0	0	0	0	0	0	0	0	0	0	0	0	0	0	0	0	0	0	0	0	0	0	0	0	0	0	0	0	0	0	0	0	0	0	0	0	0	0	0	0	0	0	0	0	0	0
Otu299335	0	0	0	0	0	0	0	0	0	0	0	0	0	1.38729e-05	0	0	0	0	0	0	0	0	0	0	0	0	0	0	0	0	5.9585e-05	4.78085e-06	0	0	5.08585e-06	0	0	0	0	0	0	4.57538e-06	0	0	4.48358e-06	0	0	0	4.74989e-06
Otu299725	0	0	0	0	0	0	0	0	0	0	0	0	0	4.6243e-06	0	0	0	0	0	0	0	0	0	0	0	0	0	0	9.91483e-06	0	0	0	0	0	0	0	0	0	0	0	0	0	0.000421622	0	0	0	0	0	0
Otu300092	4.6318e-06	0	0	0	0	0	5.9522e-06	0	0	0	0	8.67021e-06	0	9.2486e-06	0	0	0	0	4.333e-06	0	0	0	0	0	0	0	0	0	0	0	0	0	0	0	5.08585e-06	0	0	0	0	0	0	0	9.69246e-06	6.64219e-05	0	0	1.91846e-05	0	0
Otu303921	0	0	0	0	0	0	0	0	0	0	0	0	0	0	0	0	0	0	0	0	0	0	0	0	0	0	0	0	0	0	0	6.2151e-05	0	0	0	0	0	0	0	0	0	0	0	0	0	0	0	0	0
Otu30465	0	0	0	0	0	0	0	0	0	0	0	0	0	0	0	0	0	0	0	0	0	0	0	0	0	0	0	0	0	0	0	4.78085e-06	0	0	0	0	0	0	0	0	0	0	0	0	0	0	0	0	0
Otu310283	0	0	0	0	0	0	0	0	0	0	0	0	0	0	0	0	0	0	0	0	5.05094e-06	0	0	0	0	0	0	0	0	0	0	0	0	0	0	0	0	0	0	0	0	0	0	0	0	6.03394e-05	0	0	0
Otu321854	0	0	0	0	0	0	0	0	0	0	0	0	0	0	0	0	0	5.0804e-06	4.333e-06	0	0	0	0	0	0	0	0	6.43912e-05	0	0	0	0	0	0	0	0	0	0	0	0	4.99775e-06	1.37261e-05	0	4.74442e-06	0	0	0	4.66057e-06	0
Otu329906	0	0	0	4.64074e-06	0	0	0	5.54695e-05	0	0	0	4.3351e-06	0	4.6243e-06	0	0	0	0	2.1665e-05	0	0	0	0	0	4.73303e-06	9.34693e-06	0	0	0	0	0	1.43425e-05	0	0	0	0	0	4.96231e-06	0	0	0	0	0	0	4.48358e-06	0	0	0	0
Otu333656	0	0	0	0	0	0	0	0	0	0	0	0	0	0	0	0	0	0	0	0	0	0	0	0	0	0	0	0	0	0	0	0	0	0	0	0	0	0	0	0	0	0	0	0	0	0	0	0	0
Otu343506	0	0	0	0	0	0	0	0	0	0	0	0	0	0	0	0	0	0	0	0	0	0	0	0	0	0	0	0	0	0	0	0	0	0	0	0	0	0	0	0	0	0	0	0	0	0	0	5.12663e-05	0
Otu343802	0	0	0	0	0.00050352	0	0	0	0	0	0	0	0	0	0	0	0	0	0	0	0	0	0	0	0	0	0	0	0	0	0	0	0	0	0	0	0	0	0	0	0	0	0	0	0	0	0	0	0
Otu34872	0	0	0	0	0	0	0	0	0	0	0	0	0	0	0	0.0012161	0	0	0	0	0	0	0	0	0	0	0	0	0	0	0	0	0	0	0	0	0	0	0	0	0	0	0	0	0	0	0	0	0
Otu354549	0	0	0	0	0	0	0	0	0	0	0	0	0	0	0	0	0	0	0	0	0	0	4.93029e-06	0	0	0	0	0	0	0	0	4.78085e-06	0	0	0	0	0	0	0	0	0	0	0	0	0	0	0	0	0
Otu354577	0	0	0	0	0	0	0	0	0	0	0	0	0	0	0	0	0	0	0	0	0	0	0	0	0	0	0.000743434	0	0	0	0	0	0	0	0	0	0	0	0	0	0	0	1.93849e-05	0	0	0	0	0	0
Otu358083	0	0	0	0	0	0	0	0	0	0	0	0	0	0	0	0	0	0.000101608	4.333e-06	0	0	0	0	0	0	0	0	0	0	0	0	0	0	0	0	0	0	0	0	0	0	0	0	0	0	0	0	0	0
Otu36279	0	0	0	0	0	0	0	0	0	0	0	0	0	0	0	0	0	0	0	0	0	0	0	0	0	0	0	0	0.00017351	0	0	0	0	0	0	0	0	0	0	0	0	0	0	0	0	0	0	0	0
Otu363321	0	0	0	0	0	0	0	0	0	0	0	4.3351e-06	0	0	0	0	0	0	0	0	0	0	0	0	0	0	0	0	0	0	0	0	0	0	0	0	0	0	0	0	0	0	5.81547e-05	0	0	0	0	0	0
Otu36399	0	4.84069e-06	0	0	0	4.98137e-06	0	0	0	0	0	0.000121383	4.62366e-06	4.6243e-06	0	8.90916e-06	4.61072e-06	1.01608e-05	0	0	0	0	4.93029e-06	5.11015e-06	0	0	2.23926e-05	4.95317e-06	4.95742e-06	9.62881e-06	1.48962e-05	4.78085e-06	4.74172e-06	4.7357e-06	0	0	0	0	5.06894e-06	0	0	0	4.84623e-06	0	8.96716e-06	5.02828e-06	1.43884e-05	0	0
Otu36422	0	0	0	0	0	0	5.9522e-06	0	0	0	0	4.3351e-06	2.31183e-05	9.2486e-06	4.42229e-06	8.90916e-06	0	0	4.333e-06	4.45012e-06	0	0	1.47909e-05	0	0	0	0	0	0	4.8144e-06	1.48962e-05	1.91234e-05	4.74172e-06	0	0	4.54779e-06	0	0	0	0	1.9991e-05	9.15076e-06	9.69246e-06	4.26998e-05	3.58686e-05	2.51414e-05	4.79614e-06	4.66057e-06	0
Otu368542	0	0	0	0	0	0	0	0	0	0	0	0	0	0	0	0	0	0	0	0	0.000237394	0	0	0	0	0	0	0	0	0	0	0	0	0	0	0	0	0	0	0	0	0	9.69246e-06	0	0	0	0	0	0
Otu368558	0	0	0	0	0	0	0	0	0	0	0	0	0	0	0	0	9.22143e-06	0	0	0	0	0	0	0	0	0	0	0	4.95742e-06	0	0	0	0	0	0	0	0	0	0	0	0	0	0	0	0	0	0	0	0
Otu36934	9.26359e-06	0	0	4.64074e-06	0	0	0	0	0	0	0	0	0	0	0	0	0	0	0	0	0	0	0	0	0	0	0	0	0	4.8144e-06	0	0	0	0	0	0	0	0	0	0	0	0	0	0	0	0	0	9.32114e-06	0
Otu370875	0	4.84069e-06	0	4.64074e-06	0	0	0	0	0	0	0	0	0	0	0	4.45458e-06	0	0	0	0	0	0	0	5.11015e-06	0	0	0	0	0	0	0	0	0	4.7357e-06	0	0	0	0	0	0	0	0	0	0	0	2.01131e-05	0	0	0
Otu371032	0	0	0	0	0	0	0	4.62246e-06	0	0	4.88632e-06	0	0	4.6243e-06	0	0	0	0	0	0	0	0	0	0	0	0	0	0	0	0	4.96542e-06	0	0	0	0	0	0	0	0	0.000243756	0	0	4.84623e-06	0	0	5.02828e-06	0	4.66057e-06	0
Otu371139	0	0	0	0	0	0	0	0	0	0	0	0	0	0	0	0	9.22143e-06	0	0	0	0	0	0	0	0	0	0	0	4.95742e-06	0	0	0	0	0	0	0	0	0	0	0	0	0	0	0	5.82866e-05	0	0	0	0
Otu37301	0	0	0	0	0	0	0	0	0	0	0	0	0	0	0	0	0	0	0	0	0	0	0	0	0	0	0	0	0	0	0	0	0	0	0	0	0	0	0	0	0	0	0	0	0	0	0	0	0
Otu373336	0	0	0	0	0	0	0	0	0	0	0	0	0.000915484	0	8.84459e-06	0	0	0	0	0	0	0	0	0	0	0	0	0	0	0	0	0	0	0	0	0	0	0	0	0	0	0	0	0	0	0	0	0	0
Otu379884	0	0	0	0	0	0	0	0	0	0	0	0	0	0	0	0	0	0	0	0	0	0	0	0	0	0	0	0	0	0	0	0	0	0	0	0	0	0	0	0	0	0	0	0	0	0	0	0	5.22488e-05
Otu38301	0	0	0	0	0	0	0	0	0	0	0	0	0	0	0	0	0	0	0	0	0	0	0	0	0	0	0	9.90634e-06	0	0	0	0	0	0	0	0	0	0	0.00023824	0	0	0	0	0	0	0	0	0	0
Otu383718	0	0	0	0	0	0	0	5.54695e-05	0	0	0	0	0	0	0	0	0	0	0	0	0	0	0	0	0	0	0	0	0	0	0	0	0	0	0	0	0	0	0	0	0	0	0	0	0	0	0	0	0
Otu383777	0	0	0	0	0	0	0	0	0	0	0	1.30053e-05	0	0	0	0	0	0	0	0	0	0	0	0	0	0	0	0	0	0	0	0	0	0	0	0	0	0	0	0	0	0	0	0	0	0	0	0	0
Otu383853	0	0	0	0	0	0	0	0	0	0	0	0	0	0	0	0	0	0	0	0	1.51528e-05	0	0	0	0	0	0	0	0	0	0	0	0	0	0	0	0	0	0	0	0	0	0	0	4.48358e-06	0	0	0	0
Otu383860	0	0	0	0	0	9.96274e-06	0	0	0	0	0	0	0	0	0	0	0	0	0	0	0	0	0	0	0	0	0	0	0	0	0	0	0	0	0	0	0	0	0	0	0	0	4.84623e-06	0	0	0	0	0	0
Otu386433	0	0	0	0	0	0	0	0	0	0	0	0	0	0	0	0	0	0	0	0	0.0002677	0	0	0	0	0	0	0	0	0	0	0	0	0	0	0	0	0	0	0	0	0	0	4.74442e-06	0	0	0	0	0
Otu389435	0	0	0	0	0	0	0	0	0	0	0	4.3351e-06	0	0	0	0	0	0	6.0662e-05	0	0	0	0	0	0	0	0	0	0	0	0	0	0	0	0	0	0	0	0	0	0	0	0	0	0	0	0	0	0
Otu390425	0	0	0	0	0	0	0	0	0	0	0	0	0	0	0	0	0	0	0	0	0	0	0	0	0	0	0	0	0	0	0	0	0	0	0	0	0	0	0	0	0	0	4.84623e-06	0	0	0	0	0	0
Otu391318	0	0	0	0	0	0	0	6.47144e-05	0	0	0	0	0	0	0	0	0	0	0	0	0	0	0	0	0	0	0	0	0	0	0	0	0	0	0	0	0	0	0	0	0	0	0	0	0	0	0	0	0
Otu391549	0	0	0	0	0	0	0	0	0	0	0	0	0	0	0	8.90916e-06	0	0	0	0	0	0	0	0	0	0	0	0	0	0	0	0	0	0	0	0	0	0	0	0	0	0	0	0	0	0	0	0	0
Otu394272	0	0	0	0	0	0	0	0	0	0	9.77264e-06	0	0	0	0	0	0	0	8.666e-06	0	0	0	9.86057e-06	0	0	4.67347e-06	0	0	0	0	4.96542e-06	0	0	0	0	0	0	0	0	0	0	0	0	0	0	0	0	0	0
Otu395450	0	4.84069e-06	0	4.64074e-06	0	4.98137e-06	0	0	0	0	9.77264e-06	0.000177739	4.62366e-06	0	4.42229e-06	8.90916e-06	4.61072e-06	0	0	0	0	1.37364e-05	0	0	0	4.67347e-06	0	4.45785e-05	0	0	9.93083e-06	9.56169e-06	0	0	0	4.54779e-06	0	0.000287814	0	4.77952e-06	0	9.15076e-06	0	0	1.79343e-05	1.50849e-05	0	0	4.74989e-06
Otu395451	0	9.68139e-06	9.53225e-06	0	0.000124681	0	2.9761e-05	0	0	0.000113548	5.86358e-05	8.67021e-06	0	3.23701e-05	8.84459e-06	8.90916e-06	4.61072e-06	0.000111769	1.2999e-05	3.5601e-05	0	0	9.86057e-06	0	0	2.80408e-05	0.000143313	0	0	0	9.93083e-06	4.78085e-06	0	5.20927e-05	1.01717e-05	4.54779e-06	0	0	0.000197689	2.38976e-05	0	0	0	0	4.48358e-05	0	2.87768e-05	0	0
Otu402578	0	0	0	0	0	0	0	0	0	0	0	0	4.62366e-06	0	0	1.33637e-05	0	0	4.333e-06	8.90024e-06	0	0	0	0	0	0	0	0	0	0	0	0	0	0	0	4.54779e-06	0	0	0	0	0	0	7.75397e-05	0	0	5.02828e-06	0	4.66057e-06	0
Otu4041	0	0	0	0	0	0	0	0	0	0	0	0	0	0	0	0	0	0	0	0	0	0	0	0	0	0	0	0	0	0	0	0	0	0	0	0	0	0	0	0	0	0	0	0	0	0	0	0	0
Otu405553	0	0	0	0	0	0	0	0	0	0	0	0	0	0	0	8.90916e-06	0	0.000177814	0	0	0	0	0	0	0	0	0	0	0	0	0	0	0	0	0	0	0	0	0	0	0	0	0	0	0	0	0	0	0
Otu408509	0.000199167	0.000193628	5.71935e-05	0.000510481	0.000158249	0.000179329	0.000226184	0.00033744	0.000223844	0.00024602	0.000386019	0.000472526	0.000397635	0.000406938	0.000371473	0.000708278	0.000433407	0.000116849	0.000532959	0.000333759	0.000287904	0.000192309	0.000285957	0.000158415	0.000236652	0.000406591	0.00015227	0.000341769	0.000312317	0.00016369	0.000402199	0.000516331	0.00013751	0.000284142	0.00060013	0.000131886	5.55814e-05	0.000332475	0.000253447	0.000291551	0.000284872	0.000402634	0.00029562	0.000616774	0.000242113	0.000447517	0.000268584	0.000475378	0.000318243
Otu408515	0	0	0	0	0	0	0	0	0	0	0	0	0	0	0	0	0	0	0	0	0	0	0	0	0	0	0	0	0	0	0	0	0	0	0	0	0	0	0	0	0	0	0	0	8.96716e-05	0	0	0	0
Otu412431	0	0	0	0	0	0	0	0	0	0	0	0	0	0	0	0	0	0	0	0	0	0	0	0	0	0	0	0	0	0	0	0	0	0	0	0	0	0	0	0	0	0	0	0	0	0	0	0	0
Otu412433	0	0	0	0	0	0	0	0	0	0	0	0	0	0	0	0	0	0	0	0	0	0	0	0	0	0	0	0	0	0	0	0	0	0	0	0	0	0	0	0	0	0	0	0	0	0	0	0	0
Otu412436	0	0	0	0	0	0	0	0	0	0	0	0	0	0	0	0	0	0	0	0	0	0	4.93029e-06	0	0	0	0	0	0	0	0	0	0	0	0	0	0	0	0	0	0	0	0	0	0	0	0	0	0
Otu414756	0	0	0	0	0	0	5.9522e-05	0	0	0	0	0	0	9.2486e-06	0	0	0	0	0	0	0	0	0	0	0	0	0	0	0	0	0	0	0	0	0	0	0	0	0	4.77952e-06	0	0	0	0	0	0	0	0	0
Otu416428	0	0	0	0	0	0	0	0	0	0	0	0	0	0	0	0	0	0	0	0	0	0	0	0	0	0	0	0	0	0	0	0	0	0	0	0	0	0	0	0	0	0	0	2.37221e-05	0	0	0	0	0
Otu422821	0	0	0	0	0	0	0	0	0	0	0	0	0	0	0	0	0	0	0	0	0	0	0	0	0	0	0	0	0	0	0	0	0	0	0	0	0	0	0	0	0	0	0	0	0	5.53111e-05	0	0	0
Otu428001	0	0	0	0	0	0	0	0	0	0	0	0	0	0	0	0	0	0	0	0	0	0	0	0	0	0	0	0	0	0	0	0	0	0	0	0	0	0	0	5.25747e-05	0	0	0	0	0	0	0	0	0
Otu429886	0	0	0	0	0	0	0	9.24492e-06	0	0	0	0	0	0	0	0	0	0	0	0	0	0	0	0	0	0	0	0	0	0	0	0	0	0	0	0	0	0	0	0	0	0	0	0	0	0	0	0	0
Otu432944	0	0	0	0	0	0	0	0	0	0	0	0	0	0	0	0	0	0	0	0	0	0	0	0	0	0	4.47852e-06	0	0	0	0	0	5.69006e-05	0	0	0	0	0	0	0	0	0	0	0	0	0	0	0	0
Otu433760	0	0	0	0	0	0	0	0	0	0	0	0	4.62366e-06	0	0	8.01825e-05	0	0	0	0	0	0	0	0	0	0	0	0	0	0	0	0	0	0	0	0	0	0	0	0	0	0	0	0	0	0	0	0	0
Otu433763	0	0	0	0	0	0	0	0	0	0	0	0	0	0	0	0	0	0	0	0	0	0	0	0	0	0	0	0	0	0	0	5.25893e-05	0	0	0	0	0	0	0	0	0	0	0	0	0	0	0	0	0
Otu437081	0	0	0	0	0	0	0	0	0	0	0	0	0	0	0	0	0	0	4.333e-06	0	0	0	0	0	0	0	0	0	0	0	0	0	0	0	0	0	0	0	0	0	0	0	0	0	0	0	0	0	0
Otu437712	0	0	0	0	0	0	0	0	0	0	0	0	0	0	0	0	0	0	0	0	0	0	0	0	0	0	0	0	0	0	0	0.000583263	0	0	0	0	0	0	0	0	0	0	0	0	0	0	0	0	0
Otu439997	0	0	0	4.64074e-06	0	0	0	0	0	0	0	4.3351e-06	1.3871e-05	0	0.000145936	4.45458e-06	4.61072e-06	0	0	0	0	0	0	0	0	0	0	0	0	0	0	9.56169e-06	0	0	0	0	0	0	0	4.77952e-06	0	0	0	9.48884e-06	0	0	0	0	0
Otu446052	0	0	0	0	0	0	0	0	0	0	0	0	0	0	0	0	0	0	0	0	0	0	0	0	0	7.94489e-05	0	0	0	0	0	0	0	0	0	0	0	0	0	0	0	0	0	0	0	0	0	0	0
Otu448913	0	0	0	0	0	0	0	0	0	0	0	0	0	0	0	0	0	0	0	6.23017e-05	0	0	0	0	0	0	0	0	0	0	0	0	0	0	0	0	0	0	0	0	0	0	0	0	0	0	0	0	0
Otu451204	0	0	0	0	0	0	0	0.000134051	0	0	0	0	0	0	0	0	0	0	0	0	0	0	0	0	0	0	0	0	0	0	0	0	0	0	0	4.54779e-06	0	0	0	0	0	0	0	0	0	0	0	0	0
Otu451465	0	0	0	0	0	0	0	0	0.000461678	0	0	0	0	0	0	0	0	0	0	0	0	0	0	0	0	0	0	0	0	0	0	0	0	0	0	0	0	0	0	0	4.99775e-06	0	0	0	0	0	0	0	0
Otu451670	0	0	0	0	0	0	0	0	0	0	0	0	0	6.93645e-05	0	0	0	0	0	0	0	0	0	0	0	0	0	0	0	0	0	0	0	0	0	0	0	0	0	0	0	0	0	0	0	0	0	0	0
Otu451673	0	0	0	0	0	0	0	0	0	0	0	0	0	0	0	0	0	0	0	0	0	0	0	0	0	0	0	0	0	0	0	0	0	0	0	0	0	0	0	0	0	0	0	0	0	0	0	0	0
Otu454307	0	0	0	0	0	0	0	0	0	0	0	0	0	0	0	0	0	0	0	0	0	0	0	0	0	0	0	0	0	0	0	0	0	0	0	0	0	0	0	0	0	0	5.33085e-05	0	0	0	0	0	0
Otu456665	0	0	0	0	0	0	0	0	0	0	0	0	0	0	0	0	0	0	0	0	0	0	0	0	0	0	0	0	0	0	0	0	0	0	0	0	0	0	0	0	0	0	0	0	0	0	0	0	0
Otu458672	0	0	0	0	0	0	0	0	0	0	0	0	0	0	0	0	0	0	0	0	0	0	0	0	0	0	0	4.95317e-06	0	0	0	0	0	0	0	0	0	0	0.000435929	0	4.99775e-06	0	0	9.96328e-05	0	0	0	0	0
Otu459115	0	0	0	0	0	0	0	0	0	0	0	0	0	0	0	0	0	0	0	0	0	0	0	0	0	0	0	0	0	0	0	0	0	0	0	0	0	0	0	0	0	0	0	0	0	0	0	0	0
Otu460951	0	0	0	0	0	0	0	0	0	0	0	0	0	0	0	0	0	0	0	0	0	0	0	0	0	0	0	0	0	0	0	0	0	0	0	0	0	0	0	0	0	0	0	0	0	0	0	0	0
Otu462569	0	0	0	0	0	0	0	0	0	0	0	0	0	0	0	0	0	0	0	0	0	0	0	0	0	0	0	1.48595e-05	0	0	0	0	0	0	0	0	0	0	0	0	0	0	0	0	0	0	0	0	0
Otu467876	0	0	0	0	0	0	0	0	0	0	0	0	0	0	0	0	0	0	0	0	0	0	0	0	0	0	0	0	0	0	0	0	0	0	0	0	0	0	0	0	0	0	0	0	0	0	0	0	0
Otu467877	0	0	0	0	0	0	0	0	0	0	0	0	0	0	0	0	0	0	0	0	0	0	0	0	0	0	0	0	0	0	0	0	0	0	0	0	0	0	0	0	0	0	0	0	0	0	0	0	0
Otu472600	0	0	0	0	0	0	0	0	0	0	0	0	0	0	0	0	0	0	0	0	0	0	0	0	0	0	0	0	0	0	0	0.000105179	0	0	0	0	0	0	0	0	0	0	0	0	0	0	0	0	0
Otu475690	0	0	0	0	0	0	0	0	0	0	0	0	0	0	0	0	0	0	0	0	0	0	0	0	0	0	0	0	0	0	0	0	0	0	0	0	0	0	0	0	0	0	0	0	0	0	0	0	0
Otu475693	0	0	0	0	0	0	0	0	0	0	0	0	0	0	0	0	0	0	0	0	0	0	0	0	0	0	5.82208e-05	0	0	0	0	0	0	0	0	0	0	0	0	0	0	0	0	0	0	0	0	0	0
Otu478407	0	0	0	0	0	0	0	0	0	0	0	0	0	0	0	0	0	0	0	0	0	0	0	0	0	0	0	0	0	0	0	0	0	0.00060617	0	0	0	0	0	0	0	0	4.84623e-06	0	0	0	0	0	0
Otu479901	0	0	0	0	0	0	0	0	0	0	0	0	0	0	0	0	0	0	0	0	0	0	0	0	0	0	0	0	0	0	0	0	0	0	0	0	0	0	0	0	0	0	9.69246e-06	0.00203536	0	0	0	0	0
Otu481314	0	0	0	0	0	0	0	0	0	0	0	0	0	0	0	0	0	0	0	0	0	0	0	0	0	0	0	0	0	0	5.46196e-05	0	0	0	0	0	0	0	0	0	0	0	0	0	0	0	0	0	0
Otu482884	0	0	0	0	0	0	0	0	0	0	0.000693857	0	0	0	0	0	0	0	0	0	1.01019e-05	0	0	0	0	0	0	0	0	0	0	0	0	0	0	0	0	0	0	0	0	0	0	0	0	0	0	0	0
Otu484627	0	0	0	0	0	0	0	0	0	0	0	0	0	0	0	0	0	0	0	0	0	0	0	0	0	0	0	0	0	0	0	0	0	0	0	0	0	0	0	0	0	0	0	0	0	0	0	0	0
Otu487514	0	0	0	0	0	0	0	0	0	0	0	0	0	0	0	0	0	0	6.9328e-05	0	0	0	0	0	0	0	0	0	0	0	0	0	0	0	0	0	0	0	0	0	0	0	0	0	0	0	0	0	0
Otu488481	0	0	0	0	0	0	0	0	0	0	0	0	0	0	0	0	0	0	0	0	0	0	0	0	0	0	0	0	0	0	0	0	0	0	0	0	0	0	0	0	0	0	0	0	4.48358e-06	0	0	0	0
Otu488815	0	0	0	0	0	0	0	0	0	0	0	0	0	0	0	0	0	0	0	0	0	0	0	0	0	0	0	0	0	0	0	0	0	0	0	0	0	0	0	0	0	0	0	0	7.17373e-05	0	0	0	0
Otu488816	0	0	0	0	0	0	0	0	0	0	0	0	0	0	0	0	0	0	0	0	0	0	0	0	0	0	0	0	0	0	0	0	0	0	0	0	0	0	0	0	0	0	0	0	0	0	0	0	0
Otu488819	0	0	0	0	0	0	0	0	0	0	0	0	0	0	0	0	0	0	0	0	0	0	0	0	0	0	0	0	0	0	0	0	0	0	0	0	0	0	0	0	0	0	0	0	0	0	0	0	0
Otu488889	0	0	0	0	0	0	0	0	0	0	0	0	0	0	0	0	0	0	0	0	0	0	0	0	0	0	0	0	0	0	0	0	0	0	0	0	0	0	0	0	0	9.6083e-05	0	0	0	0	0	0	0
Otu489992	0	0	0	0	0	0	0	0	0	0	0	0	0	0	0	0	0	0	0	0	0	0	0	0	0	0	0	0	0	0	0	0	0	0	0	0	0	0	0	0	0	0	0	0	0	0	0	0	0
Otu489993	0	0	0	0	0	0	0	0	0	0	0	0	0	0	0	0	0	0	0	0	0	0	0	0	0	0	0	0	0	0	0	0	0	0	0	0	0	0	0	0	0	0	0	0	0	0	0	0	0
Otu489995	0	0	0	0	0	0	0	4.62246e-06	0	0	0	0	0	0	0	0	0	0	0	0	0	0	0	0	0	0	0	0	0	0	4.96542e-06	0	0	0	0	0	0	0	0	0	0	0	5.33085e-05	0	0	0	0	0	0
Otu491116	0	0	0	0	0	0	0	0	0	0	0	0	0	0	0	0	0	0	0	0	0	0	0	0	0	0	0	0	0	0	0	0	0	0	0	0	0	0	5.57583e-05	0	0	0	0	0	0	0	0	0	0
Otu494504	0	0	0	0	0	0	0	0	0	0	0	0	0	0	0	0	0	0	0	0	0	0	0	0	0	0	0	0	0	0	0	0	0	0	0	0	0	0	0	0	0	0	0	7.11663e-05	0	0	0	0	0
Otu494508	0	0	0	0	0	0	0	0	0	0	0	0	0	0	0	0	0	0	0	0	0	0	0	0	0	0	0	0	0	0	4.96542e-06	0	0	0	0	0	0	0	0	0	0	0	0	0	0	0	0	0	0
Otu495644	0	0	0	0	0	0	0	0	0	0	0	0	0	0	0	0	0	0	0	0	0	0	0	0	0	0	0	0	0	0	0	0	0	0	0	0	0	0	0	0	0.000134939	0	0	0	0	0	0	0	0
Otu495645	0	0	0	0	0	0	0	0	0	0	0	0	0	0	0	0	0	0	0	0	0	0	0	0	0	0	0	0	0	0	0	0	0	0	0	0	0	0	0	0	0	0	0	0	0	8.54808e-05	0	0	0
Otu495648	0	0	0	0	0	0	0	0	0	0	0	0	0	0	0	0	0	0	0	0	0	0	0	0	0	0	0	0	0	0	0	0	0	0	0	0	0	0	0	0	0	0	6.3001e-05	0	0	0	0	0	0
Otu496572	0	0	0	0	0	0	0	0	0	0	0	0	0	0	0	5.79096e-05	0	0	0	0	0	0	0	0	0	0	0	0	0	0	0	0	0	0	0	0	0	0	0	0	0	0	0	0	0	0	0	0	0
Otu503705	0	0	0	0	0	0	0	0	0	0	0	0	0	0	0	0	0	0	0	0	0	0	0	0	0	0	0	0	0	0	8.93775e-05	0	0	0	0	0	0	0	0	0	0	0	0	0	0	0	0	0	0
Otu503707	0	0	0	7.42518e-05	0	0	0	0	0	0	0	0	0	0	0	0	0	0	0	0	0	0	0	0	0	0	0	0	0	0	0	0	0	0	0	0	0	0	0	0	0	0	0	0	0	0	0	0	0
Otu504387	0	0	0	6.49703e-05	0	0	0	0	0	0	0	0	0	0	0	0	0	0	0	0	0	0	0	0	0	0	0	0	0	0	0	0	0	0	0	0	0	0	0	0	0	0	0	0	0	0	0	0	0
Otu505030	0	0	0	0	0	0	0	0	0	0	0	0	0	0	0	0	0	0	0	0	0	0	0	0	0	0	0	0	0	4.8144e-06	0	0	0	0	0	0	0	0	0	0	0	0	0	0	0	0	0	0	0
Otu506453	0	4.84069e-06	0	0	0	0	0	0	0	0	0	0	5.08602e-05	0	0	0	0	0	0	0	0	0	0	0	0	0	0	0	0	0	0	0	0	0	0	0	0	0	0	0	0	0	0	0	0	0	0	0	0
Otu507205	0	0	0	0	0	0	0	0	0	0	0	6.50266e-05	0	0	0	0	0	0	0	0	0	0	0	0	0	0	0	0	0	0	0	0	0	0	0	0	0	0	0	0	0	0	0	0	0	0	0	0	0
Otu507915	0	0	0	0	0	0	0	0	0	0	0	0	0	0	8.84459e-05	0	0	0	0	0	0	0	0	0	0	0	0	0	0	0	0	0	0	0	0	0	0	0	0	0	0	0	0	0	0	0	0	0	0
Otu508488	0	0	0	0	0	0	0	0	0	0	0	0	0	0	0	0	0	0	0	0	0	0	0	0	0	0	0	0	0	0	0	0	0	0	0	0	0	0	0	0	0	0	0	0	0	0	0	0	0
Otu508495	0	0	0	0	0	0	0	0	0	0	0	0	0	0	0	0	0	0	0	0	0	0	0	0	0	0	0	0	0	0	0	0	0	0	0	0	0	0	0	0	0	0	0	0	0	0	0	0	0
Otu509226	0	0	0	0	0	0	0	0	0	0	0	0	0	0	0	0	0	0	0	0	0	0	0	0	0	0	0	0	0	0	0	0	0	0	0	0	0	0	0	0	0	0	0	0	0	0	0	0	0
Otu509227	0	0	0	0	0	0	0	0	0	0	0	0	0	0	0	0	0	0	0	0	0	0	0	0	0	0	0	0	0	0	0	0	0	0	0	0	0	0	0	0	0	0	0	0	0	6.53677e-05	0	0	0
Otu509739	0	0	0	0	0	0	0	0	0	0	0	0	0	0	0	0	0	0	0	0	0	0	0	0	0	0	0	0	0	0	0	0	0	0	0	0	0	0	0	0	0	0	0	0	0	0	0	0	0
Otu510236	0	0	0	0	0	0	0	0	0	0	0	0	0	0	0	0	0	0	0	0	0	0	0	0	0	0	0	0	0	0	0.000819294	0	0	0	0	0	0	0	0	0	0	0	0	0	0	0	0	0	0
Otu510237	0	0	0	0	0	0	0	0	0	0	0.000136817	0	0	0	0	0	0	0	0	0	0	0	0	0	0	0	0	0	0	0	0	0	0	0	0	0	0	0	0	0	0	0	0	0	0	0	0	0	0
Otu510238	0	0	0	0	0	0	0	0	0	0	0	0	0	0	0	0	0	0	0	0	0	0	0	0	0	0	0	0	0	0	0	0	0	0	0	0	0	0	0	0	0	0	0	0	0	0	0	0	0
Otu511335	0	0	0	0	0	0	0	0	0	0	0	0	0	0	0	0	0	0	0	0.000938975	0	0	0	0	0	0	0	0	0	0	0	0	0	0	0	0	0	0	0	0	0	0	0	0	0	0	0	0	0
Otu511896	0	0	0.000376524	0	0	0	0	0	0	0	0	0	0	0	0	0	0	0	0	0	0	0	0	0	0	0	0	0	0	0	0	0	0	0	0	0	0	0	0	0	0	0	0	0	0	0	0	0	0
Otu512961	0	0	0	0	0	0	0	0	0	0	0	0	0	0	0	0	0	0	0	0	0	0	0	0	0	0	0	0	0	0	0	0	0	0	0	0	0	0	0	0	0	0	0	0	0	0	0	0	0
Otu512962	0	0	0	0	0	0	0	0	0	0	0	0	0	0	0	0	0	0	0	0	0	0	0	0	0	0	0	0	0.000193339	0	0	0	0	0	0	0	0	0	0	0	0	0	0	0	0	0	0	0	0
Otu512964	0	0	0	0	0	0	0	0	0	0	0	0	0	0	0	0	0	0	0	0	0	0	0	5.62116e-05	0	0	0	0	0	0	0	0	0	0	0	0	0	0	0	0	0	0	0	0	0	0	0	0	0
Otu513474	0	0	0	0	0	0	0	0	0	0	0	0	0	0	0	0.000579096	0	0	0	0	0	0	0	0	0	0	0	0	0	0	0	0	0	0	0	0	0	0	0	0	0	0	0	0	0	0	0	0	0
Otu51376	0	0	0	0	0	0	0	0	0	0	0	0	0	0	0	0	0	0	0	0	0	0	0	1.53304e-05	0	4.67347e-06	0	0	9.91483e-06	0.000197391	9.93083e-06	0.000215138	0.000118543	0	0	0	0	0	0	0	0	0	0	0	0	0	0	0	0
Otu51588	3.70544e-05	0	0	4.64074e-06	0	4.98137e-06	1.19044e-05	9.24492e-06	0	0	2.44316e-05	8.67021e-06	1.84946e-05	4.6243e-06	4.42229e-06	4.45458e-06	9.22143e-06	1.01608e-05	2.1665e-05	0	2.02038e-05	0	4.93029e-06	0	4.73303e-06	4.67347e-06	1.34356e-05	0	0	4.8144e-06	4.96542e-06	4.78085e-06	0	0	0	4.54779e-06	5.05285e-06	1.48869e-05	5.06894e-06	0	2.49888e-05	9.15076e-06	4.84623e-06	0	1.34507e-05	5.02828e-06	4.79614e-06	0	1.42497e-05
Otu51649	0	0	0	0	0	0	0	0	0	0	0	0	9.24731e-06	0	0	0	0	0	0	4.45012e-06	0	0	0	0	0	0	0	0	0	4.8144e-06	0	0	0	0	0	0	0	0	0	0	0	0	0	0	0	0	0	0	0
Otu517660	0	0	0	0	0	0	0	0	0	0	0	0	0	0	0	0	0.000497957	0	0	0	0	0	0	0	0	0	0	0	0	0	0	0	0	0	0	0	0	0	0	0	0	0	0	0	0	0	0	0	0
Otu517663	0	0	0	0	0	0	0	0	0	0	0	0	0	0	0	0	0	0	0	0	0	0	0	0	0	0	0	0	0	0	0	0	0.000398304	0	0	0	0	0	0	0	0	0	0	0	0	0	0	0	0
Otu518955	0	0	0	0	0	0	0	0	0	0	0	0	0	0	0	0	6.455e-05	0	0	0	0	0	0	0	0	0	0	0	0	0	0	0	0	0	0	0	0	0	0	0	0	0	0	0	0	0	0	0	0
Otu519527	0	0	0	0	0	0	0	0	0	0	0	0	0	0	0	0	0	0	0	0	0	0	0	0	0	0	0	0	0	0.000370709	0	0	0	0	0	0	0	0	0	0	0	0	0	0	0	0	0	0	0
Otu521607	0	0	0	0	0	0	0	0	0	0	0	0	0	0.00130405	0	0	0	0	0	0	0	0	0	0	0	0	0	0	0	0	0	0	0	0	0	0	0	0	0	0	0	0	0	0	0	0	0	0	0
Otu521608	0	0	0	0	0	0	0	0	0	0	0	0	0	0	0	0	0	0	0	0	0	0	0	0	0	0	0	0	0	0	0	0	0	0	0	0	0	0	0	0.000430157	0	0	0	0	0	0	0	0	0
Otu522101	0	0	0	0	0	0	0	0	0	0	0	0	0	0	0	0	0	0	0	0	0	0	0	0	0	0	0	0	0	0	0	0	0	0	0	0	0	0	0	0	0	0	0	0	0	0	0	0	0
Otu523742	0	0	0	0	0	0	0	0	0	0	0	0	0	0	0	0	0	0	0	0	0	0	0	0	0	0	0	0	0	0	0	0	0	0	0	0	0	0	0	0	0	0	0	0	0	0	0	0	0
Otu524494	0	0	0	0	0	0	0	0	0	0	0	0	0	0	0	0	0	0	0	0	0	0	0	0	0	0	0	0	0	0	0	0	0	0	0	0	0	0	0	0	0	0	0	0	0	0	0	0	0
Otu52793	0	0	0	0	0	0	0	0	0	0	0	0	0	0	0	0	0	0	0	0	0	0	0	0	0	0	0	0	0	0	0	0	0	0	0	0	0	0	5.06894e-06	0	0	0	0.000785089	0	0	0	0	0	0
Otu54945	0	0	0	0	0	0	0	0	0	0	0	0	0	4.6243e-06	0	0	0	0	0	0	0	0	0	0	0	0	4.47852e-06	0	0	0	0	0	0	0	0	0	0	0	0	4.77952e-06	0	9.15076e-05	0	0	0	0	0	0	0
Otu60019	0	4.84069e-06	0	9.28147e-06	4.79543e-06	0	0	0	0	0	0	0	0	0	0	0	0	0	0	0	0	0	0	0	0	6.0755e-05	0	0	0	0	0	0	0	0	0	0	0	0	0	0	0	0	0	0	0	0	0	0	0
Otu64343	9.26359e-06	0	9.53225e-06	4.64074e-06	0	4.98137e-06	5.9522e-06	0	1.86537e-05	0	9.77264e-06	0	2.77419e-05	0	0	8.90916e-06	0	0	1.2999e-05	0	0	0	1.97211e-05	0	0	0	0	9.90634e-06	0	0.00040441	0	9.56169e-06	9.48344e-06	4.7357e-06	2.54292e-05	0	0	0	0	9.55904e-06	4.99775e-06	1.83015e-05	0	0	0	4.02263e-05	4.79614e-06	4.66057e-06	0
Otu64348	0	0	0	0	0	9.96274e-06	0	0	0	0	0	4.3351e-06	9.24731e-06	4.6243e-06	0	0	0	0	4.333e-06	0	0	0	4.93029e-06	0	4.73303e-06	4.67347e-06	0	0	0	0	0	0	0	0	0	4.54779e-06	0	6.94724e-05	0	0	0	0	0	0	0	0	0	0	0
Otu64354	9.26359e-06	1.93628e-05	9.53225e-06	5.56888e-05	1.91817e-05	9.96274e-06	6.54742e-05	4.62246e-06	4.19708e-05	2.83869e-05	3.42042e-05	5.20212e-05	3.23656e-05	3.23701e-05	2.21115e-05	4.45458e-05	2.30536e-05	1.01608e-05	1.7332e-05	1.78005e-05	0	9.15759e-06	4.93029e-05	5.11015e-06	4.73303e-06	9.34693e-06	8.95704e-06	5.44848e-05	9.41909e-05	2.88864e-05	2.48271e-05	2.86851e-05	3.3192e-05	2.36785e-05	0	1.81912e-05	5.05285e-06	9.92462e-06	2.02758e-05	4.77952e-06	2.49888e-05	1.37261e-05	2.90774e-05	6.64219e-05	6.27701e-05	1.00566e-05	1.43884e-05	2.33029e-05	9.49979e-06
Otu64417	0	0	0	1.85629e-05	0	0	0	0	0	4.73115e-06	0	8.67021e-06	9.24731e-06	0	0	8.90916e-06	0	0	8.666e-06	0	0	3.20516e-05	0	0	0	0	0	2.47658e-05	0	4.8144e-06	0	0	0	0	0	0	0	0	0	4.77952e-06	9.9955e-06	0	0	4.74442e-06	0	0	4.79614e-06	0	9.49979e-06
Otu64690	4.6318e-06	4.84069e-06	0	1.39222e-05	4.79543e-06	4.98137e-06	0	0	0	0	4.88632e-06	8.67021e-06	9.24731e-06	2.77458e-05	4.42229e-06	0	0	5.0804e-06	3.4664e-05	0	5.05094e-06	0	0	5.11015e-06	0	2.33673e-05	0	0	0	0	9.93083e-06	4.78085e-06	0	9.4714e-06	5.08585e-06	4.54779e-06	0	4.96231e-06	1.52068e-05	9.55904e-06	1.9991e-05	4.57538e-06	0	1.42333e-05	8.96716e-06	1.50849e-05	4.79614e-06	0	4.74989e-06
Otu65091	0	0	4.76613e-06	5.10481e-05	0	0	0	0	0	0	0	0	0	0	0	0	0	0	0	0	0	0	0	0	0	4.67347e-06	8.95704e-06	9.90634e-06	0	0	0	0	0	0	0	0	0	0	0	0	0	0	0	0	0	0	0	0	0
Otu66060	0	0	0	0	0	0	0	0	0	0	0	0	0	0	0	0	0	0	0	0	1.01019e-05	0	0	0	0	0	0	0	0	0	0	0	0	0	0	0	0	0	0	0	0	0	0	0	0	0	0	0	0
Otu66170	0	0	0	0	0	0	0	0	0	0	0	0	0	0	0	0	0	0	0	0	0	0	0	0	0	0	0	0	0	2.4072e-05	0	9.56169e-06	4.26755e-05	0	0	0	0	0	0	0	0	0	0	0	0	0	0	0	0
Otu71305	0	0	0	0	0	0	0	0	0	0	0	0	0	0	0	0	0	0	0	0	0	0	0	0	0	0	0	0	0	0	0	0	0	0	0	0	0	0	0	0	0	0	0	0	0	0	0	0	0
Otu73902	0	0	0	0	0	0	0	0	0	0	0	0	0	0	0	0	0	0	0	0	0	0	0	0	0	0	0	0	0	0	0	0	0	0	0	0	0	0	0	0	0	0	0	0	0	0	0	0	0
Otu77104	0	0	0	0	0	0	0	0	0	0	0	0	0	0	0	0	0	0	0	0	0	0	0	0	0	0	0	0	0	0	0	0	0	0	0	0	0	0	0	0	0	0	0	0	0	0	0	0	0
Otu7821	0	0	0	0	0	0	0	0	0	0	4.88632e-06	0	0	0	0	0	0	0	0	0	0	0	0	0	0	0	0	0	0	0	0	0	0	0	0	0	0	0.000109171	0	0	0	0	0	0	0	0	0	0	0
Otu78665	0	0	0	0	0	0	0	0	0	0	0	0	0	0	0	0	0	0	0	0	0	0	0	0	0	0	0	4.95317e-06	0	0	0	0	0	0	0	0	0	0	0	0	0	0	0	0	0	0	0	0	0
Otu79120	0	0	0	0	0	0	0	0	0	0	0	0	0	0	0	0	0	0	0	0	0	0	0	0	0	0	0	0	0	0.000587357	0	0	0	0	0	4.54779e-06	0	0	0	0	0	0	0	0	0	0	0	0	0
Otu8006	0	0	0	0	0	0	0	0	0	0	0	0	0	0	0	0	0	0	0	0	0	0	0	0	0	4.67347e-06	1.34356e-05	0	0	9.62881e-06	0	3.82468e-05	5.21589e-05	0	0	0	0	0	0	0	0	0	0	0	0	0	0	0	0
Otu80784	0	0	0	4.64074e-06	0	0	0	0	0	0	0	0	0	0	0	0	0	0	0	0	0	0	0.000142978	0	0	0	0	0	0	0	0	0	0	0	0	0	0	0	0	0	0	0	0	0	0	0	0	0	0
Otu82751	0	0	0	0	0	0	0	0	0	0	0	5.63563e-05	0	0	0	0	0	0	0	0	0	0	0	0	0	0	0	0	0	0	4.96542e-06	0	0	4.7357e-06	0	0	0	0	0	0	0	0	0	0	0	0	0	0	0
Otu83657	0	0	0	0	0	0	0	0	0	0	5.86358e-05	0	0	0	0	0	0	0	0	0	5.05094e-06	0	0	0	0	4.67347e-06	0	0	0	0	0	4.78085e-06	0	0	0	0	0	0	0	0	0	0	0	0	0	0	0	0	0
Otu86081	0	0	9.53225e-06	0	0	0	0	0	0	0	0	0	0	4.6243e-06	0	0	0	0	0	0	0	0	0	0	0	0	0	0	0	0	0	0	0	0	0	0	0	0.000431721	0	0	0	0	0	0	0	0	4.79614e-06	0	0
Otu88052	0	0	0	0	0	0	0	0	0	0	0	4.3351e-06	1.84946e-05	0	0	0	0	0	0	0	0.000101019	0	0	0	0	0	0	0	0	0	0	0	0	0	0	0	0	0	0	0	0	0	0	0	0	0	0	0	9.49979e-06
Otu88601	0	0	0	0	0	0	0	0	0	0	0	0	0	0	0	0	4.61072e-06	0	0	0	0	0	0	0	0	0	0	0	0	0	0	0	0	0	0	0	0	0	0	0	0	0	0	0	0	0	0	0.00056859	0
Otu90655	0	0	0	0	0	0	0	0	0	0	0	0	0	0	0	0	0	0	0	0	0	0	0	0	0	0	0	0	0	0	0	0	0	0	0	0	0	0	0	0	0	0	0	4.74442e-06	0	0	0	8.38903e-05	0
Otu90672	0	0	0	0	0	0	6.54742e-05	9.24492e-06	0	9.4623e-06	4.88632e-06	0	0	4.6243e-06	0	0	0	0	0	0	0	0	7.39543e-05	0	0	0	0	0	0	0	0	0	0	0	0	0	0	0	0	0	0	0	0	4.74442e-06	0	0	0	0	0
Otu90836	0	0	0	0	0	0	0	0	0	0	0	0	4.62366e-06	0	0	0	0	0	5.6329e-05	0	0	0	0	0	0	0	0	0	0	0	0	0	0	0	0	0	0	0	0	0	0	0	0	0	0	0	0	0	4.74989e-06
Otu93043	0	0	0	0	0	0	0	0	1.86537e-05	0	0	0	0	0	1.32669e-05	0	0	0	0	8.90024e-06	0	0	0	0	0	0	0	0	0	4.8144e-06	0	0	0	0	0	0	5.05285e-06	0	0	0	0.000709681	0	0	0	0	0	0	0	0
Otu95456	0.000115795	4.84069e-05	4.28951e-05	0.000194911	3.83634e-05	5.47951e-05	0.00024404	0.000129429	0.000116585	6.62361e-05	0.000141703	0.000260106	0.000245054	0.000110983	6.19121e-05	0.000218274	0.0001291	4.06432e-05	0.000164654	0.000120153	0.000479839	5.03668e-05	9.36754e-05	6.13218e-05	0.000113593	0.000214979	0.000147791	0.000113923	0.00119969	5.77729e-05	0.000114205	0.00016733	2.37086e-05	7.57712e-05	5.08585e-05	5.45735e-05	2.02114e-05	6.451e-05	7.09651e-05	0.000124268	0.000144935	0.000150988	0.000121156	0.000170799	0.00012554	0.000286612	0.000254195	0.000191083	9.0248e-05
Otu95485	0	0	0	9.28147e-06	9.59085e-06	1.49441e-05	5.9522e-06	4.62246e-06	0	0	0	3.90159e-05	0	9.2486e-06	4.42229e-06	0	4.61072e-06	0	4.333e-06	4.45012e-06	0	0	4.93029e-06	0	9.46607e-06	4.67347e-06	0	0	4.95742e-06	0	9.93083e-06	0	4.74172e-06	4.7357e-06	5.08585e-06	0	0	3.96985e-05	5.06894e-06	4.77952e-06	9.9955e-06	0	4.84623e-06	1.89777e-05	4.48358e-06	1.00566e-05	0	0	4.74989e-06
Otu95503	4.6318e-06	0	0	1.39222e-05	0	0	1.19044e-05	9.24492e-06	0	4.73115e-06	0	0	9.24731e-06	1.38729e-05	0	1.33637e-05	0	0	1.2999e-05	0	0	0	3.4512e-05	0	9.46607e-06	0	4.47852e-06	0	1.48722e-05	9.62881e-06	3.97233e-05	0	0	4.7357e-06	0	0	0	1.48869e-05	0	4.77952e-06	0	1.37261e-05	9.69246e-06	0	4.48358e-06	0	0	2.33029e-05	4.74989e-06
Otu95531	0	0	0	9.28147e-06	2.39771e-05	0	0	0	0	0	0	0	0	0.000120232	0	0	0	0	0	0	0	0	0	0	0	0	4.47852e-06	0	0	0	0	9.56169e-06	0	0	0	0	0	0	0	0	0	0	4.84623e-06	0	0	6.53677e-05	0	0	0
Otu95831	0	0	0	0	0	0	0	0	0	0	0	0	4.62366e-06	0	4.42229e-06	0	1.38322e-05	0	0.000827603	0	0	0	0	0	0	0	0	0	0	0	0	0	0	0	0	0	0	0	0	0	4.99775e-06	0	0	4.74442e-06	0	0	0	0	0
Otu95906	0	0	0	1.39222e-05	0	0	0	0	0	0	0	0	0	0	0	0	0	0	0	0	0	0	0	0.000541676	0	0	0	0	0	0	0	0	0	0	0	0	0	0	0	0	0	0	0	9.48884e-06	0	0	0	0	0
Otu96257	0	0	0	0	0	0	0	0	0	0	0	0	0	0	0	0	0	0	0	0	0	0	0	0	0	0	0	0	0	5.29585e-05	0	0	0	0	0	0	0	0	0	0	0	0	0	0	0	0	0	0	0
Otu965	0	0	0	0	0	0	0	0	0	0	0	0	0	0	4.42229e-06	0	0	0	0	0	0	0	4.93029e-06	0	0	0	1.34356e-05	0	0	6.25873e-05	0	0.000349002	0.00315324	0	0	0	0	0	0	0	0	0	0	0	0	0	0	0	4.74989e-06
Otu967	0	0	0	0	0	0	5.9522e-06	0	0	0	0	0	0	0	0	0	0	0	0	0	0	0	0	0	0	0	0	0	0	0	0	0	0	0	0	0	0	4.96231e-06	0.00134834	0	0	0	0	0	0	0	0	0	0
Otu968	0.000111163	3.87255e-05	2.85968e-05	3.71259e-05	4.79543e-06	3.9851e-05	5.35698e-05	6.47144e-05	0	8.98919e-05	0.000127044	0.000754308	0.00032828	6.93645e-05	7.5179e-05	2.22729e-05	0.000124489	7.11256e-05	0.000212317	2.67007e-05	1.01019e-05	1.37364e-05	9.36754e-05	4.08812e-05	0.000255584	0.00012151	0.00012092	9.41102e-05	0.000356934	3.85152e-05	9.43429e-05	1.91234e-05	1.42252e-05	6.62998e-05	3.05151e-05	3.63823e-05	0.000186956	3.47362e-05	0.000131792	2.86771e-05	5.49753e-05	2.28769e-05	0.000150233	5.6933e-05	5.3803e-05	0.000135764	5.27575e-05	0.00024235	0.000517738
Otu970	9.26359e-06	9.68139e-06	0	4.64074e-06	4.79543e-06	0	1.19044e-05	4.16021e-05	3.73073e-05	3.31181e-05	9.77264e-06	8.67021e-06	1.3871e-05	0	0	4.45458e-06	4.61072e-06	0	4.333e-06	0	0	0	0	0	0	0	0	0	4.95742e-06	4.8144e-06	0	0	0	0	0	0	0	0	0.000273723	6.69133e-05	0.000904593	0	0	0	8.96716e-06	0	4.79614e-06	0	9.49979e-06
Otu974	2.3159e-05	0	4.76613e-06	7.88925e-05	9.59085e-06	0.000612708	0.000279754	4.62246e-06	0	4.73115e-06	0.000112385	1.30053e-05	1.3871e-05	7.86131e-05	4.42229e-06	3.56366e-05	9.22143e-06	0	1.2999e-05	6.67518e-05	1.51528e-05	0	4.93029e-06	0	2.36652e-05	1.40204e-05	0	0.00309573	2.97445e-05	0	2.48271e-05	1.91234e-05	0.000312953	5.68284e-05	5.08585e-06	4.54779e-06	0	0	0.00052717	3.34566e-05	0	4.11784e-05	0.000237465	1.42333e-05	4.48358e-06	1.50849e-05	1.91846e-05	4.66057e-05	3.32493e-05
Otu978	0	0	0	0	0	0	0	0	0	0	0	0	0	0	0	0	0	5.0804e-06	0	0	0	0	0	0	0	0	7.61349e-05	0	0	5.29585e-05	4.96542e-06	0.000387249	6.16423e-05	0	0	0	0	0	0	0	0	0	0	0	0	0	0	0	0
Otu979	4.6318e-06	0	4.76613e-06	1.39222e-05	8.63177e-05	4.48323e-05	5.9522e-06	0.000332817	0.000130576	5.67738e-05	1.95453e-05	8.67021e-06	9.70968e-05	2.77458e-05	1.32669e-05	5.79096e-05	4.61072e-06	1.52412e-05	1.2999e-05	8.90024e-06	0	4.12092e-05	4.93029e-06	0	4.73303e-06	4.67347e-06	0	9.90634e-06	0.000272658	4.8144e-06	8.44121e-05	0	4.74172e-06	2.36785e-05	0	0.00012279	5.05285e-06	9.92462e-06	1.01379e-05	9.55904e-06	3.9982e-05	0.00017844	0	0.00011861	2.24179e-05	3.5198e-05	4.79614e-06	1.39817e-05	9.49979e-06
Otu986	0	5.32476e-05	0.000119153	0	5.75451e-05	0.000154422	0	9.24492e-06	0.000102595	0.000193977	5.86358e-05	0.000112713	4.62366e-06	9.2486e-06	0	3.11821e-05	2.76643e-05	0.000284502	0	4.00511e-05	0	1.37364e-05	4.93029e-06	1.02203e-05	9.46607e-06	0.000205632	1.79141e-05	9.90634e-06	0.000109063	0	3.97233e-05	0	1.89669e-05	0	0.000223777	3.18345e-05	0	0	0.000212895	0	9.9955e-05	5.948e-05	4.84623e-06	0	8.07045e-05	4.52546e-05	0.000177457	0.000144478	9.49979e-06
Otu98765	0	0	0	0	0	0	0	0	0	0	4.88632e-06	0	0	0	0	0	0	0	0	0	0	0	0	0	0	0	0	0	0	0	0	0	0	0	0	0	0	0	0	0	0	0	0	4.74442e-06	0	1.50849e-05	0	0	0
Otu988	0	0	0	0	0	0	5.9522e-06	8.32043e-05	0	0	0	1.30053e-05	4.62366e-06	4.6243e-06	1.76892e-05	0	0	1.52412e-05	2.1665e-05	2.67007e-05	4.54584e-05	0	4.93029e-06	0	0	0	0	4.95317e-06	3.47019e-05	0	0	1.43425e-05	0	0	0	0	0	9.92462e-06	1.52068e-05	4.77952e-06	1.49933e-05	1.83015e-05	9.69246e-06	2.37221e-05	1.34507e-05	1.50849e-05	4.79614e-06	1.86423e-05	0
Otu98952	0	0	0	0	0	0	0	0	0	0	0	0	0	0	0	0	0.000281254	0	4.333e-06	0	0	0	0	0	0	0	0	0	0	0	0	0	0	0	0	0	0	0	0	0	0	0	0	0	0	0	0	0	0
Otu99602	0	8.22918e-05	0	4.64074e-06	0	0	5.9522e-06	4.62246e-06	0	0	0	0	0	0	0	0	0	0	0	0	0	0	0	0	0	0	0	0	0	0	0	0	0	0	0	0	0	0	0	0	0	0	0	0	0	0	0	0	0
Pediococcus	2.3159e-05	0.00131667	4.76613e-06	0	0	9.96274e-06	0.000321419	4.62246e-06	0.000391727	7.56984e-05	0	8.67021e-06	4.62366e-06	0	1.76892e-05	0	0	0	0.000207984	0	0	4.5788e-06	4.93029e-06	0	4.73303e-06	0	0	4.95317e-06	0	0	4.96542e-06	0	9.48344e-06	0.0106174	0	5.91213e-05	0.000136427	0	5.06894e-06	4.77952e-06	0.00209906	0.000526169	0	1.89777e-05	0	0	9.59228e-06	0	0
Otu14062	0	0	0	0	0	0	0	0	0	0	0	0	0	0	0	0	0	0	0	0	0	0	0	0	0	0	0	0	0	0	0	0	0	5.20927e-05	0	0	0	0	0	0	0	0	0	0	0	0	0	0	0
Otu207	2.3159e-05	0.00131667	4.76613e-06	0	0	9.96274e-06	0.000321419	4.62246e-06	0.000391727	7.56984e-05	0	8.67021e-06	4.62366e-06	0	1.76892e-05	0	0	0	0.000207984	0	0	4.5788e-06	4.93029e-06	0	4.73303e-06	0	0	4.95317e-06	0	0	4.96542e-06	0	9.48344e-06	0.0105653	0	0	0.000136427	0	5.06894e-06	4.77952e-06	0.00209906	0.000526169	0	1.89777e-05	0	0	9.59228e-06	0	0
Otu324052	0	0	0	0	0	0	0	0	0	0	0	0	0	0	0	0	0	0	0	0	0	0	0	0	0	0	0	0	0	0	0	0	0	0	0	5.91213e-05	0	0	0	0	0	0	0	0	0	0	0	0	0
unclassified	0.000106531	0	0	0	0	0	5.9522e-06	0	0	0	5.86358e-05	0	5.08602e-05	0	8.84459e-06	0	4.61072e-06	5.0804e-06	4.333e-06	6.67518e-05	2.02038e-05	0	0	0	0	5.14081e-05	0	4.95317e-06	0.000371806	0	0	0	0	9.4714e-06	0	0.00026832	5.05285e-06	0	5.06894e-06	9.55904e-06	4.99775e-06	0	4.84623e-06	8.53995e-05	0.000959486	3.01697e-05	0	4.66057e-06	0
Otu154093	0	0	0	0	0	0	0	0	0	0	0	0	0	0	0	0	4.61072e-06	0	0	1.33504e-05	1.01019e-05	0	0	0	0	0	0	0	0	0	0	0	0	0	0	0	0	0	0	0	0	0	0	4.74442e-06	0.000959486	0	0	0	0
Otu192279	0	0	0	0	0	0	0	0	0	0	0	0	0	0	0	0	0	0	0	0	1.01019e-05	0	0	0	0	0	0	0	0	0	0	0	0	9.4714e-06	0	0	0	0	5.06894e-06	0	0	0	0	4.74442e-06	0	0	0	4.66057e-06	0
Otu228913	0	0	0	0	0	0	0	0	0	0	0	0	0	0	4.42229e-06	0	0	0	0	0	0	0	0	0	0	5.14081e-05	0	0	0	0	0	0	0	0	0	0	0	0	0	0	0	0	0	0	0	0	0	0	0
Otu239487	0	0	0	0	0	0	0	0	0	0	0	0	0	0	0	0	0	0	0	0	0	0	0	0	0	0	0	0	0	0	0	0	0	0	0	0	5.05285e-06	0	0	0	0	0	0	0	0	0	0	0	0
Otu358978	0	0	0	0	0	0	0	0	0	0	0	0	0	0	0	0	0	0	0	0	0	0	0	0	0	0	0	0	0	0	0	0	0	0	0	0	0	0	0	0	0	0	0	6.64219e-05	0	0	0	0	0
Otu363729	0	0	0	0	0	0	0	0	0	0	0	0	0	0	0	0	0	0	0	0	0	0	0	0	0	0	0	0	0.000371806	0	0	0	0	0	0	0	0	0	0	0	0	0	0	0	0	0	0	0	0
Otu479894	0	0	0	0	0	0	0	0	0	0	0	0	0	0	0	0	0	0	0	5.34014e-05	0	0	0	0	0	0	0	0	0	0	0	0	0	0	0	0	0	0	0	0	0	0	0	0	0	0	0	0	0
Otu53063	0	0	0	0	0	0	0	0	0	0	0	0	5.08602e-05	0	0	0	0	0	0	0	0	0	0	0	0	0	0	0	0	0	0	0	0	0	0	4.54779e-06	0	0	0	0	4.99775e-06	0	0	0	0	0	0	0	0
Otu53088	0	0	0	0	0	0	5.9522e-06	0	0	0	0	0	0	0	0	0	0	5.0804e-06	0	0	0	0	0	0	0	0	0	0	0	0	0	0	0	0	0	0.000263772	0	0	0	9.55904e-06	0	0	0	0	0	2.51414e-05	0	0	0
Otu57455	0	0	0	0	0	0	0	0	0	0	5.86358e-05	0	0	0	4.42229e-06	0	0	0	0	0	0	0	0	0	0	0	0	4.95317e-06	0	0	0	0	0	0	0	0	0	0	0	0	0	0	4.84623e-06	4.74442e-06	0	5.02828e-06	0	0	0
Otu58969	0.000106531	0	0	0	0	0	0	0	0	0	0	0	0	0	0	0	0	0	4.333e-06	0	0	0	0	0	0	0	0	0	0	0	0	0	0	0	0	0	0	0	0	0	0	0	0	4.74442e-06	0	0	0	0	0
Leuconostocaceae	0.00285782	0.00139896	0.000362226	0.00272875	0.00293001	0.00317313	0.00423202	0.0024083	0.00242964	0.00108817	0.00414849	0.0044955	0.0018171	0.00514222	0.00379875	0.00227184	0.00618297	0.000340387	0.00113958	0.00037826	0.000222241	0.00060898	0.000281026	0.000117533	0.000260317	0.00047202	0.000165705	0.000430926	0.000366849	0.000211834	0.00023834	0.00011474	4.26755e-05	0.00210739	0.00196314	0.00158263	0.00127332	0.00303197	0.0100264	0.00171107	0.00840122	0.00349102	0.00605294	0.00698853	0.00619183	0.0045154	0.00195203	0.0022697	0.0020282
Leuconostoc	4.6318e-06	4.84069e-06	9.53225e-06	5.10481e-05	0	4.98137e-06	1.19044e-05	1.38674e-05	9.79318e-05	4.25804e-05	2.44316e-05	1.73404e-05	4.62366e-05	9.2486e-06	1.76892e-05	6.23641e-05	9.22143e-06	2.03216e-05	1.2999e-05	0	0	0	0	0	2.83982e-05	3.27143e-05	0	1.48595e-05	1.98297e-05	1.44432e-05	1.48962e-05	1.91234e-05	1.42252e-05	0	5.08585e-06	1.81912e-05	0	0	0	9.55904e-06	0	0.000132686	2.90774e-05	0.000123355	2.69015e-05	3.5198e-05	9.59228e-06	1.39817e-05	4.74989e-06
Otu1001	4.6318e-06	4.84069e-06	9.53225e-06	5.10481e-05	0	4.98137e-06	1.19044e-05	1.38674e-05	9.79318e-05	4.25804e-05	2.44316e-05	1.73404e-05	4.62366e-05	9.2486e-06	1.76892e-05	6.23641e-05	9.22143e-06	2.03216e-05	1.2999e-05	0	0	0	0	0	2.83982e-05	3.27143e-05	0	1.48595e-05	1.98297e-05	1.44432e-05	1.48962e-05	1.91234e-05	1.42252e-05	0	5.08585e-06	1.81912e-05	0	0	0	9.55904e-06	0	0.000132686	2.90774e-05	0.000123355	2.69015e-05	3.5198e-05	9.59228e-06	1.39817e-05	4.74989e-06
Weissella	0.00285319	0.00139412	0.000352693	0.00267771	0.00293001	0.00316815	0.00422011	0.00239443	0.00233171	0.00104558	0.00412405	0.00447816	0.00177086	0.00513297	0.00378106	0.00220947	0.00617375	0.000320065	0.00112658	0.00037826	0.000222241	0.00060898	0.000281026	0.000117533	0.000231919	0.000439306	0.000165705	0.000416066	0.000347019	0.000197391	0.000223444	9.56169e-05	2.84503e-05	0.00210739	0.00195805	0.00156444	0.00127332	0.00303197	0.0100264	0.00170151	0.00840122	0.00335833	0.00602386	0.00686517	0.00616492	0.0044802	0.00194244	0.00225572	0.00202345
Otu1054	9.26359e-06	0	4.76613e-06	0	4.79543e-06	0	0	3.69797e-05	0	0	4.88632e-06	1.30053e-05	0	0	8.84459e-06	8.90916e-06	4.61072e-06	0	8.666e-06	4.45012e-06	0	4.5788e-06	0	1.53304e-05	4.73303e-06	4.67347e-06	4.47852e-06	4.95317e-06	4.95742e-06	9.62881e-06	0	1.43425e-05	0	9.4714e-06	0	0	3.03171e-05	4.96231e-06	6.58962e-05	9.55904e-06	0	9.15076e-06	0	4.74442e-06	0	2.01131e-05	0	4.66057e-06	0
Otu1388	6.94769e-05	9.68139e-06	0	1.39222e-05	4.31588e-05	1.99255e-05	0	9.24492e-06	0	0	1.4659e-05	1.30053e-05	0	0	4.42229e-06	1.33637e-05	0	0	0	0	0	0	0	0	0	0	0	0	0	0	0	0	4.74172e-06	6.15641e-05	0	1.36434e-05	0	0	9.12409e-05	0	0	9.15076e-06	4.84623e-06	0	0	1.50849e-05	0	0	0
Otu211	0.000833723	0.00091005	0.000238306	0.00168923	0.000944699	0.000876721	0.000392845	0.000841288	0.000718166	0.000756984	0.0020718	0.00353744	0.00152581	0.00401852	0.00104808	0.00166156	0.000276643	0.000213377	0.000901264	8.01022e-05	9.09169e-05	0.000100734	0.000113397	4.59913e-05	0.00015619	0.000303775	0.000134356	0.000356628	0.000272658	0.000154061	0.000114205	4.78085e-05	9.48344e-06	0.00053987	0.00130706	0.00117333	0.000373911	0.000888254	0.000963098	0.000850755	0.0053376	0.00235175	0.00406599	0.00481558	0.00231801	0.00124199	0.00090647	0.00184559	0.000527238
Otu267138	0	0	0	0	0	0	0	0	0	0	0	0	0	0	0	0	0	0	0	0	0	0	0	0	0	0	0	0	0	0	0	0	0	0	0	0	0	0	0	0	0	0	0	0	0	0	0.000786567	0	0
Otu281538	0	0	0	0	0	0	0	0	0.000279805	0	0	0	0	0	0	4.45458e-06	0	0	0	0	0	0	0	0	0	0	0	0	0	0	0	0	0	0	0	0	0	0	0	0	0	0	0	0	0	0	0	0	0
Otu29	0.00194072	0.000474388	0.000109621	0.000974555	0.00193735	0.0022715	0.00382727	0.0015023	0.00132907	0.0002886	0.00197407	0.000914707	0.000245054	0.00111446	0.00271971	0.000521186	0.0058095	0.000106688	0.00021665	0.000293708	0	0.000503668	0.00016763	5.62116e-05	7.09955e-05	0.000130857	2.68711e-05	5.44848e-05	6.94038e-05	3.37008e-05	0.000109239	3.34659e-05	1.42252e-05	0.000615641	0.000645903	0.000377467	0.000869091	0.00213876	0.00890612	0.000841196	0.00306362	0.000988282	0.00195303	0.00204484	0.00384691	0.00320302	0.000249399	0.00040547	0.00149622
Otu343458	0	0	0	0	0	0	0	0	4.66342e-06	0	0	0	0	0	0	0	0	0	0	0	0	0	0	0	0	0	0	0	0	0	0	0	0	0.00088084	0	0	0	0	0	0	0	0	0	0	0	0	0	0	0
Otu36283	0	0	0	0	0	0	0	4.62246e-06	0	0	0	0	0	0	0	0	0	0	0	0	0.000131324	0	0	0	0	0	0	0	0	0	0	0	0	0	5.08585e-06	0	0	0	0	0	0	0	0	0	0	0	0	0	0
Otu502430	0	0	0	0	0	0	0	0	0	0	0	0	0	0	0	0	8.29929e-05	0	0	0	0	0	0	0	0	0	0	0	0	0	0	0	0	0	0	0	0	0	0	0	0	0	0	0	0	0	0	0	0
Otu95458	0	0	0	0	0	0	0	0	0	0	0	0	0	0	0	0	0	0	0	0	0	0	0	0	0	0	0	0	0	0	0	0	0	0	0	0	0	0	0	0	0	0	0	0	0	0	0	0	0
Otu95469	0	0	0	0	0	0	0	0	0	0	5.86358e-05	0	0	0	0	0	0	0	0	0	0	0	0	0	0	0	0	0	0	0	0	0	0	0	0	0	0	0	0	0	0	0	0	0	0	0	0	0	0
Streptococcaceae	0.00387681	0.00182494	0.00067679	0.00276124	0.00175513	0.0016837	0.00640457	0.00435898	0.00412246	0.00146193	0.00271191	0.00148261	0.00153043	0.0221134	0.00451516	0.00604487	0.00467066	0.00220997	0.00250881	0.00414306	0.00179813	0.0180862	0.0166496	0.00371508	0.0053152	0.00240683	0.00115098	0.00255088	0.00193339	0.00214241	0.001723	0.00142469	0.00531072	0.00244362	0.00144947	0.00159173	0.000606342	0.00173681	0.005956	0.00258094	0.00651207	0.00581989	0.00214688	0.00382875	0.00213867	0.00569705	0.00170263	0.00225106	0.00518213
Lactococcus	0.00367765	0.00165552	0.000557637	0.00212546	0.0015777	0.00153924	0.00558912	0.00387824	0.00332502	0.0012301	0.00194476	0.00112713	0.0011929	0.0216278	0.00372799	0.00505595	0.00383151	0.00204232	0.00219683	0.00408966	0.00157084	0.0179077	0.0163587	0.00359755	0.00476616	0.00186004	0.000989753	0.00227846	0.000946866	0.00203168	0.00160383	0.00139123	0.00531072	0.0022684	0.00119517	0.00136888	0.000520444	0.00156809	0.00559104	0.00213167	0.00554251	0.00437864	0.00163803	0.00281818	0.0017486	0.00453551	0.00126618	0.0018083	0.00487339
Otu1052	0	9.68139e-06	0	0	0	0	0	4.62246e-06	0	0	0	4.3351e-06	0	1.38729e-05	0	0	0	0	0	0	0	9.15759e-06	4.93029e-05	5.11015e-06	4.73303e-06	0	0	7.42975e-05	0	9.62881e-06	0	0	4.74172e-06	0	0	0	0	0	5.06894e-05	0	4.99775e-06	0	0	0	0	0	0	0	4.74989e-06
Otu107	0.000532656	0.000319486	0.000133452	0.000867818	0.000575451	0.000513081	0.00120235	0.000813553	0.00126845	0.000439997	0.000659653	0.000455186	0.000642688	0.000490176	0.00198561	0.00419622	0.00203333	0.00176798	0.00193252	0.000698669	0.000671775	0.00158884	0.000631077	0.000224847	0.00407041	0.00123847	0.000573251	0.000787554	0.000689081	0.000500698	0.00128108	0.00108047	0.001432	0.000421477	0.00047807	0.000495709	0.000267801	0.00047142	0.00103406	0.000855534	0.0019941	0.00228312	0.000319851	0.0013996	0.000385588	0.00243872	0.000541964	0.00128632	0.00297343
Otu125	0.00181103	0.000721263	0.000176347	0.000649703	0.000546679	0.000647578	0.00280944	0.00198766	0.00110057	0.000553545	0.000776925	0.000359814	0.000365269	0.0207816	0.00108788	0.000285093	0.00136938	0.000218457	0.000134323	0.00326639	0.000707131	0.0160853	0.015343	0.00268794	0.000563231	0.000327143	0.000259754	0.00126306	0.00013385	0.00148284	0.000178755	0.000296412	0.00367957	0.00110342	0.000310237	0.000354728	0.000151586	0.000674874	0.00283861	0.000841196	0.00220401	0.00104319	0.000983785	0.000317876	0.000883265	0.00132747	0.000513187	0.000368185	0.00158646
Otu14566	0	0	0	0	0	0	0	0	0	0	0	0	0	0	0	0	0	0	0	0	0	0	0	0	9.46607e-06	0	0	0	0	0	9.93083e-06	0	0.000161218	0	0	0	0	0	0	0	0	0	0	0	0	0	0	0	9.49979e-06
Otu178410	0	0	0	0	0	0	0	0	0	0	0	0	0	9.2486e-05	0	0	0	0	0	0	0	0	0	0	0	0	0	0	0	1.92576e-05	0	0	0	0	0	0	0	0	0	0	0	0	0	0	0	0	0	0	0
Otu1925	9.26359e-06	9.68139e-06	1.42984e-05	5.10481e-05	4.79543e-06	0	5.9522e-06	0	0	0	0	4.3351e-06	0	0	0	0	0	0	0	0	0	0	0	0	0	0	0	0	0	0	0	0	0	4.7357e-06	4.57726e-05	4.54779e-06	0	0	5.06894e-06	0	9.9955e-06	3.66031e-05	0	9.48884e-06	0	0	4.79614e-06	0	0
Otu36960	0	0	0	0	0	0	0	0	0	0	0	0	0	4.6243e-06	0	0	0	0	0	0	0	0.000100734	4.93029e-06	0	0	0	0	4.95317e-06	0	0	0	0	0	0	0	0	0	0	0	0	0	0	0	0	0	5.02828e-06	9.59228e-06	0	0
Otu92	0.00132469	0.000595405	0.00023354	0.000556888	0.00045077	0.000378584	0.00157138	0.00107241	0.000956001	0.000236558	0.000508177	0.000303457	0.000184946	0.000245088	0.000654499	0.000574641	0.000428797	5.58844e-05	0.00012999	0.000124603	0.000191936	0.000123628	0.000330329	0.00067965	0.000118326	0.000294428	0.000156748	0.000148595	0.000123935	1.92576e-05	0.000134066	1.43425e-05	3.3192e-05	0.000738769	0.000361095	0.0005139	0.000101057	0.000421796	0.00166261	0.000434936	0.0013294	0.00101573	0.00033439	0.00109122	0.000479743	0.000764299	0.000196642	0.000153799	0.000299243
Streptococcus	8.33723e-05	7.74511e-05	2.85968e-05	0.00019027	9.11131e-05	4.48323e-05	0.000291658	0.000217256	0.000275142	5.67738e-05	0.000346929	0.000147394	5.54839e-05	8.78617e-05	8.40236e-05	0.000378639	0.0001291	8.63668e-05	0.000151655	2.22506e-05	2.02038e-05	2.74728e-05	2.46514e-05	1.53304e-05	0.000137258	0.000102816	1.79141e-05	4.95317e-05	0.000634549	9.62881e-06	5.46196e-05	9.56169e-06	0	7.57712e-05	0.000116975	0.000113695	3.03171e-05	4.46608e-05	0.000136861	0.000124268	0.000299865	0.000576498	0.000198695	0.000374809	0.000103122	0.00020616	0.000119904	0.000130496	0.000185246
Otu108	8.33723e-05	7.74511e-05	2.85968e-05	0.00019027	9.11131e-05	4.48323e-05	0.000291658	0.000217256	0.000275142	5.67738e-05	0.000346929	0.000147394	5.54839e-05	8.78617e-05	8.40236e-05	0.000378639	0.0001291	8.63668e-05	0.000151655	2.22506e-05	2.02038e-05	2.2894e-05	2.46514e-05	1.53304e-05	0.000137258	0.000102816	1.79141e-05	4.95317e-05	2.97445e-05	9.62881e-06	5.46196e-05	9.56169e-06	0	7.57712e-05	0.000116975	0.000113695	2.52643e-05	4.46608e-05	0.000136861	0.000124268	0.000294867	0.000576498	0.000198695	0.00036532	0.000103122	0.00020616	0.000115107	0.000130496	0.000185246
Otu12190	0	0	0	0	0	0	0	0	0	0	0	0	0	0	0	0	0	0	0	0	0	4.5788e-06	0	0	0	0	0	0	0.000604805	0	0	0	0	0	0	0	5.05285e-06	0	0	0	4.99775e-06	0	0	9.48884e-06	0	0	4.79614e-06	0	0
unclassified	0.000115795	9.19732e-05	9.05564e-05	0.000445511	8.63177e-05	9.96274e-05	0.000523794	0.00026348	0.000522303	0.000175053	0.000420224	0.000208085	0.000282043	0.00039769	0.000703145	0.000610278	0.00071005	8.12864e-05	0.000160321	3.11508e-05	0.000207088	0.0001511	0.000266235	0.000102203	0.000411774	0.000443979	0.000143313	0.000222893	0.000351977	0.000101102	6.45504e-05	2.39042e-05	0	9.94497e-05	0.000137318	0.000109147	5.55814e-05	0.000124058	0.000228102	0.000325007	0.000669699	0.000864747	0.000310159	0.000635752	0.000286949	0.000955374	0.000316545	0.000312258	0.000123497
Otu14051	0	0	0	0	0	0	0	0	0	0	0	0	0	0	0	0	9.22143e-06	0	0	0	0	0	0	0	0	0	0	0	0	0	0	0	0	0	0	0	0	0	0	0	0	0	4.84623e-06	0	0	0	0	0	0
Otu229	0.000115795	9.19732e-05	9.05564e-05	0.000445511	8.63177e-05	9.96274e-05	0.000523794	0.00026348	0.000522303	0.000175053	0.000420224	0.000208085	0.000282043	0.00039769	0.000703145	0.000610278	0.000700829	8.12864e-05	0.000160321	3.11508e-05	0.000207088	0.0001511	0.000266235	0.000102203	0.000411774	0.000443979	0.000143313	0.000222893	0.000351977	0.000101102	6.45504e-05	2.39042e-05	0	9.94497e-05	0.000137318	0.000109147	5.55814e-05	0.000124058	0.000228102	0.000325007	0.000669699	0.000864747	0.000305312	0.000635752	0.000286949	0.000955374	0.000316545	0.000312258	0.000123497
unclassified	0.000528025	0.000150061	0	0.000788925	0	4.98137e-06	0.000214279	5.54695e-05	1.39903e-05	0	4.88632e-06	0.000164734	7.39785e-05	9.2486e-06	0.00108346	0.000124728	9.22143e-06	4.06432e-05	3.8997e-05	4.45012e-06	0	4.5788e-06	0.00085787	2.04406e-05	0.000113593	0.000172918	4.47852e-06	0.000733069	0.00109559	0.000370709	0	0.00157768	9.95761e-05	2.36785e-05	0	0	0	0	5.57583e-05	0	9.9955e-06	2.28769e-05	3.39236e-05	4.74442e-06	4.48358e-06	1.50849e-05	0.000776975	6.5248e-05	2.37495e-05
unclassified	0.000528025	0.000150061	0	0.000788925	0	4.98137e-06	0.000214279	5.54695e-05	1.39903e-05	0	4.88632e-06	0.000164734	7.39785e-05	9.2486e-06	0.00108346	0.000124728	9.22143e-06	4.06432e-05	3.8997e-05	4.45012e-06	0	4.5788e-06	0.00085787	2.04406e-05	0.000113593	0.000172918	4.47852e-06	0.000733069	0.00109559	0.000370709	0	0.00157768	9.95761e-05	2.36785e-05	0	0	0	0	5.57583e-05	0	9.9955e-06	2.28769e-05	3.39236e-05	4.74442e-06	4.48358e-06	1.50849e-05	0.000776975	6.5248e-05	2.37495e-05
Otu1010	0	0.00014038	0	0	0	0	0	0	0	0	0	5.20212e-05	0	0	0	0	0	0	0	0	0	0	4.93029e-06	5.11015e-06	0	0	4.47852e-06	0	0	0.00036108	0	0	0	0	0	0	0	0	0	0	0	1.83015e-05	0	0	0	0	0	0	1.89996e-05
Otu1037	0	0	0	0	0	0	0	0	0	0	0	0	0	0	0	0	0	4.06432e-05	4.333e-06	0	0	0	0	0	5.20634e-05	0	0	0	0	0	0	0	0	0	0	0	0	0	0	0	0	0	0	0	0	0	0	0	0
Otu1518	0	4.84069e-06	0	9.28147e-06	0	0	0	0	0	0	0	0	1.3871e-05	0	0	4.45458e-06	0	0	1.2999e-05	4.45012e-06	0	0	4.93029e-06	1.02203e-05	0	9.34693e-06	0	1.48595e-05	0	9.62881e-06	0	2.86851e-05	0	0	0	0	0	0	2.53447e-05	0	9.9955e-06	0	4.84623e-06	0	0	0	0	0	0
Otu15394	0.000528025	0	0	0	0	0	0	0	4.66342e-06	0	0	0	0	0	1.76892e-05	0	0	0	8.666e-06	0	0	0	4.93029e-06	0	0	4.67347e-06	0	0	9.91483e-06	0	0	0	0	0	0	0	0	0	0	0	0	0	0	0	0	0	0	0	0
Otu166537	0	4.84069e-06	0	9.28147e-06	0	0	0	0	9.32684e-06	0	0	0	0	0	0.000305138	0	0	0	0	0	0	0	0	5.11015e-06	0	0	0	0	0	0	0	0	0	0	0	0	0	0	1.52068e-05	0	0	0	4.84623e-06	0	0	1.00566e-05	0	0	4.74989e-06
Otu193065	0	0	0	0.000765722	0	0	0	0	0	0	0	0	0	0	0	0	0	0	0	0	0	0	0	0	0	0	0	0	0	0	0	0	0	0	0	0	0	0	0	0	0	0	0	0	0	0	0	0	0
Otu194270	0	0	0	0	0	0	0	0	0	0	0	5.63563e-05	0	4.6243e-06	0	4.45458e-06	0	0	0	0	0	0	0	0	0	0	0	0	0	0	0	0	0	0	0	0	0	0	0	0	0	0	0	4.74442e-06	0	5.02828e-06	0	0	0
Otu207207	0	0	0	0	0	4.98137e-06	0	0	0	0	0	0	0	0	0.000756212	0	0	0	0	0	0	0	0	0	0	0	0	0	0	0	0	0	0	0	0	0	0	0	0	0	0	0	0	0	0	0	0	0	0
Otu220728	0	0	0	0	0	0	0	0	0	0	0	0	0	0	0	0	0	0	0	0	0	0	0	0	0	0	0	0.000718209	0	0	0	0	0	0	0	0	0	0	0	0	0	0	0	0	0	0	0	0	0
Otu248	0	0	0	4.64074e-06	0	0	0	0	0	0	0	0	0	0	0	0	4.61072e-06	0	4.333e-06	0	0	0	0	0	6.15294e-05	0	0	0	0	0	0	0	0	0	0	0	0	0	0	0	0	0	0	0	0	0	0	0	0
Otu257525	0	0	0	0	0	0	0	0	0	0	0	0	0	0	0	0	4.61072e-06	0	0	0	0	0	0	0	0	0	0	0	0	0	0	0	0	0	0	0	0	0	0	0	0	0	0	0	0	0	0	0	0
Otu2608	0	0	0	0	0	0	0	0	0	0	0	0	4.62366e-06	0	0	0	0	0	0	0	0	0	0	0	0	0.000149551	0	0	0	0	0	0	0	0	0	0	0	0	0	0	0	0	1.93849e-05	0	0	0	0	0	0
Otu32709	0	0	0	0	0	0	0	0	0	0	0	0	0	0	0	0	0	0	0	0	0	0	0.000843079	0	0	0	0	0	0	0	0	0	0	0	0	0	0	0	0	0	0	0	4.84623e-06	0	0	0	0	0	0
Otu331528	0	0	0	0	0	0	0.000148805	0	0	0	4.88632e-06	0	0	0	0	0	0	0	8.666e-06	0	0	0	0	0	0	0	0	0	0	0	0	0	0	2.36785e-05	0	0	0	0	0	0	0	4.57538e-06	0	0	0	0	4.79614e-06	0	0
Otu331536	0	0	0	0	0	0	6.54742e-05	0	0	0	0	0	0	0	4.42229e-06	0	0	0	0	0	0	0	0	0	0	9.34693e-06	0	0	0	0	0	0.000248604	0	0	0	0	0	0	0	0	0	0	0	0	4.48358e-06	0	0	0	0
Otu343462	0	0	0	0	0	0	0	0	0	0	0	0	0	0	0	0	0	0	0	0	0	0	0	0	0	0	0	0	0.00059489	0	0	0	0	0	0	0	0	0	0	0	0	0	0	0	0	0	0	0	0
Otu358976	0	0	0	0	0	0	0	0	0	0	0	0	0	0	0	0	0	0	0	0	0	0	0	0	0	0	0	0	0.000490784	0	0	0	0	0	0	0	0	0	0	0	0	0	0	0	0	0	0	0	0
Otu38268	0	0	0	0	0	0	0	0	0	0	0	0	0	0	0	5.3455e-05	0	0	0	0	0	0	0	0	0	0	0	0	0	0	0	0	0	0	0	0	0	0	0	0	0	0	0	0	0	0	0	0	0
Otu414618	0	0	0	0	0	0	0	0	0	0	0	0	0	4.6243e-06	0	0	0	0	0	0	0	0	0	0	0	0	0	0	0	0	0	0.00130039	0	0	0	0	0	0	0	0	0	0	0	0	0	0	0	0	0
Otu462556	0	0	0	0	0	0	0	0	0	0	0	0	5.08602e-05	0	0	0	0	0	0	0	0	0	0	0	0	0	0	0	0	0	0	0	0	0	0	0	0	0	1.52068e-05	0	0	0	0	0	0	0	0	0	0
Otu475692	0	0	0	0	0	0	0	0	0	0	0	0	0	0	0	0	0	0	0	0	0	0	0	0	0	0	0	0	0	0	0	0	0	0	0	0	0	0	0	0	0	0	0	0	0	0	0	6.5248e-05	0
Otu479893	0	0	0	0	0	0	0	0	0	0	0	0	0	0	0	6.23641e-05	0	0	0	0	0	0	0	0	0	0	0	0	0	0	0	0	0	0	0	0	0	0	0	0	0	0	0	0	0	0	0	0	0
Otu481313	0	0	0	0	0	0	0	0	0	0	0	0	0	0	0	0	0	0	0	0	0	0	0	0	0	0	0	0	0	0	0	0	9.95761e-05	0	0	0	0	0	0	0	0	0	0	0	0	0	0	0	0
Otu488818	0	0	0	0	0	0	0	0	0	0	0	5.20212e-05	0	0	0	0	0	0	0	0	0	4.5788e-06	0	0	0	0	0	0	0	0	0	0	0	0	0	0	0	0	0	0	0	0	0	0	0	0	0	0	0
Otu489994	0	0	0	0	0	0	0	0	0	0	0	0	0	0	0	0	0	0	0	0	0	0	0	0	0	0	0	0	0	0	0	0	0	0	0	0	0	0	0	0	0	0	0	0	0	0	0	0	0
Otu496573	0	0	0	0	0	0	0	5.54695e-05	0	0	0	4.3351e-06	0	0	0	0	0	0	0	0	0	0	0	0	0	0	0	0	0	0	0	0	0	0	0	0	0	0	0	0	0	0	0	0	0	0	0	0	0
Otu60260	0	0	0	0	0	0	0	0	0	0	0	0	4.62366e-06	0	0	0	0	0	0	0	0	0	0	0	0	0	0	0	0	0	0	0	0	0	0	0	0	0	0	0	0	0	0	0	0	0	0.000772179	0	0
unclassified	0	0	0	0	0	0	0.000113092	0	0	0	0	0	0	0	8.84459e-06	0	4.61072e-06	0	0	0	0	0	0	0	0	0	0	0	0.000292488	0	0	4.78085e-06	0	4.7357e-06	0	3.18345e-05	0	0	5.06894e-06	0	0	9.15076e-06	0	0	0	0	0	0	0
unclassified	0	0	0	0	0	0	0.000113092	0	0	0	0	0	0	0	8.84459e-06	0	4.61072e-06	0	0	0	0	0	0	0	0	0	0	0	0.000292488	0	0	4.78085e-06	0	4.7357e-06	0	3.18345e-05	0	0	5.06894e-06	0	0	9.15076e-06	0	0	0	0	0	0	0
unclassified	0	0	0	0	0	0	0.000113092	0	0	0	0	0	0	0	8.84459e-06	0	4.61072e-06	0	0	0	0	0	0	0	0	0	0	0	0.000292488	0	0	4.78085e-06	0	4.7357e-06	0	3.18345e-05	0	0	5.06894e-06	0	0	9.15076e-06	0	0	0	0	0	0	0
Otu1033	0	0	0	0	0	0	0.000113092	0	0	0	0	0	0	0	4.42229e-06	0	0	0	0	0	0	0	0	0	0	0	0	0	0	0	0	0	0	4.7357e-06	0	0	0	0	0	0	0	0	0	0	0	0	0	0	0
Otu14040	0	0	0	0	0	0	0	0	0	0	0	0	0	0	0	0	0	0	0	0	0	0	0	0	0	0	0	0	9.91483e-05	0	0	0	0	0	0	0	0	0	0	0	0	9.15076e-06	0	0	0	0	0	0	0
Otu36286	0	0	0	0	0	0	0	0	0	0	0	0	0	0	0	0	0	0	0	0	0	0	0	0	0	0	0	0	9.91483e-05	0	0	4.78085e-06	0	0	0	3.18345e-05	0	0	5.06894e-06	0	0	0	0	0	0	0	0	0	0
Otu36407	0	0	0	0	0	0	0	0	0	0	0	0	0	0	0	0	0	0	0	0	0	0	0	0	0	0	0	0	1.98297e-05	0	0	0	0	0	0	0	0	0	0	0	0	0	0	0	0	0	0	0	0
Otu95509	0	0	0	0	0	0	0	0	0	0	0	0	0	0	4.42229e-06	0	4.61072e-06	0	0	0	0	0	0	0	0	0	0	0	7.43612e-05	0	0	0	0	0	0	0	0	0	0	0	0	0	0	0	0	0	0	0	0
Clostridia	8.80041e-05	6.2929e-05	4.76613e-05	0.000259881	0.000316498	0.000159404	0.00010714	0.00114175	0.000181873	0.000425804	0.000190566	0.000147394	0.00024043	0.000106359	0.000128247	0.000245002	0.0001291	1.01608e-05	6.4995e-05	3.11508e-05	2.02038e-05	4.12092e-05	4.93029e-05	5.11015e-06	2.36652e-05	0.000102816	4.47852e-06	8.42039e-05	0.0234436	4.33296e-05	0.000307856	0.000129083	4.74172e-05	6.62998e-05	5.08585e-05	0.000623047	6.56871e-05	0.000104209	0.000268654	0.000138606	0.000134939	0.000571923	0.000101771	0.000792318	9.41552e-05	0.000181018	7.67382e-05	0.000186423	2.84994e-05
Clostridiales	6.02133e-05	3.38848e-05	3.33629e-05	0.000153144	0.00023018	0.000114572	5.9522e-05	0.00106779	0.000111922	0.000397417	0.000127044	7.80319e-05	0.000203441	7.39888e-05	8.84459e-05	0.000173729	5.99393e-05	5.0804e-06	3.8997e-05	2.67007e-05	5.05094e-06	4.12092e-05	1.97211e-05	5.11015e-06	2.36652e-05	6.54285e-05	4.47852e-06	6.43912e-05	0.0232305	2.88864e-05	0.000203582	6.69318e-05	2.37086e-05	3.78856e-05	2.54292e-05	0.000450231	4.04228e-05	5.45854e-05	0.000248378	0.00010037	8.99595e-05	0.000393483	3.87698e-05	0.000588308	5.3803e-05	7.0396e-05	4.79614e-05	0.000135157	9.49979e-06
Clostridiaceae 1	0	0	4.76613e-06	0	0	1.99255e-05	0	4.16021e-05	1.39903e-05	4.73115e-06	9.77264e-06	1.30053e-05	0	4.6243e-06	4.42229e-06	3.11821e-05	0	0	8.666e-06	4.45012e-06	0	0	4.93029e-06	0	0	4.67347e-06	0	9.90634e-06	0.009895	1.44432e-05	3.47579e-05	4.78085e-06	0	0	5.08585e-06	6.82169e-05	0	9.92462e-06	5.57583e-05	4.77952e-06	0	8.69323e-05	0	0.000113866	4.48358e-06	0	0	0	4.74989e-06
Clostridium sensu stricto	0	0	4.76613e-06	0	0	1.49441e-05	0	4.16021e-05	4.66342e-06	4.73115e-06	9.77264e-06	1.30053e-05	0	4.6243e-06	0	3.11821e-05	0	0	8.666e-06	0	0	0	4.93029e-06	0	0	4.67347e-06	0	9.90634e-06	0.00115508	1.44432e-05	3.47579e-05	4.78085e-06	0	0	5.08585e-06	6.82169e-05	0	9.92462e-06	3.54826e-05	4.77952e-06	0	8.69323e-05	0	0.000109122	4.48358e-06	0	0	0	4.74989e-06
Otu337602	0	0	0	0	0	0	0	0	0	0	0	0	0	0	0	0	0	0	0	0	0	0	0	0	0	0	0	0	0.000396593	0	0	0	0	0	5.08585e-06	0	0	0	0	0	0	4.57538e-06	0	0	0	0	0	0	0
Otu343480	0	0	0	0	0	0	0	0	0	4.73115e-06	9.77264e-06	0	0	0	0	0	0	0	0	0	0	0	0	0	0	4.67347e-06	0	0	0.000109063	4.8144e-06	0	0	0	0	0	1.81912e-05	0	0	0	0	0	5.49046e-05	0	1.42333e-05	0	0	0	0	0
Otu343482	0	0	0	0	0	0	0	0	0	0	0	0	0	0	0	0	0	0	0	0	0	0	0	0	0	0	0	0	0	0	0	0	0	0	0	0	0	9.92462e-06	0	0	0	1.83015e-05	0	9.48884e-05	0	0	0	0	0
Otu343491	0	0	0	0	0	0	0	0	0	0	0	0	0	0	0	0	0	0	0	0	0	0	0	0	0	0	0	0	0.000123935	0	0	0	0	0	0	0	0	0	0	4.77952e-06	0	0	0	0	0	0	0	0	0
Otu343501	0	0	0	0	0	0	0	0	0	0	0	0	0	0	0	0	0	0	4.333e-06	0	0	0	0	0	0	0	0	0	8.92335e-05	0	0	0	0	0	0	0	0	0	0	0	0	4.57538e-06	0	0	0	0	0	0	0
Otu343503	0	0	0	0	0	0	0	0	0	0	0	0	0	0	0	0	0	0	0	0	0	0	0	0	0	0	0	0	7.43612e-05	0	0	0	0	0	0	0	0	0	0	0	0	0	0	0	0	0	0	0	0
Otu343571	0	0	4.76613e-06	0	0	0	0	0	4.66342e-06	0	0	4.3351e-06	0	0	0	0	0	0	0	0	0	0	0	0	0	0	0	0	4.95742e-05	0	0	0	0	0	0	2.72867e-05	0	0	1.01379e-05	0	0	0	0	0	0	0	0	0	0
Otu349243	0	0	0	0	0	0	0	0	0	0	0	0	0	0	0	1.78183e-05	0	0	0	0	0	0	0	0	0	0	0	4.95317e-06	7.93187e-05	0	4.96542e-06	0	0	0	0	0	0	0	0	0	0	0	0	0	0	0	0	0	0
Otu352764	0	0	0	0	0	0	0	0	0	0	0	8.67021e-06	0	4.6243e-06	0	0	0	0	0	0	0	0	0	0	0	0	0	0	8.42761e-05	0	0	4.78085e-06	0	0	0	0	0	0	0	0	0	4.57538e-06	0	0	4.48358e-06	0	0	0	0
Otu354543	0	0	0	0	0	0	0	0	0	0	0	0	0	0	0	0	0	0	0	0	0	0	0	0	0	0	0	0	6.44464e-05	0	0	0	0	0	0	0	0	0	0	0	0	0	0	0	0	0	0	0	0
Otu354545	0	0	0	0	0	0	0	0	0	0	0	0	0	0	0	0	0	0	0	0	0	0	0	0	0	0	0	0	5.45316e-05	0	0	0	0	0	0	0	0	0	0	0	0	0	0	0	0	0	0	0	0
Otu354558	0	0	0	0	0	1.49441e-05	0	4.16021e-05	0	0	0	0	0	0	0	1.33637e-05	0	0	4.333e-06	0	0	0	4.93029e-06	0	0	0	0	4.95317e-06	2.47871e-05	9.62881e-06	2.97925e-05	0	0	0	0	2.2739e-05	0	0	2.53447e-05	0	0	0	0	0	0	0	0	0	4.74989e-06
Otu533211	0	0	0	0	0	0	0	0	0	0	0	0	0	0	0	0	0	0	0	0	0	0	0	0	0	0	0	0	4.95742e-06	0	0	0	0	0	0	0	0	0	0	0	0	0	0	0	0	0	0	0	0
Fonticella	0	0	0	0	0	0	0	0	0	0	0	0	0	0	0	0	0	0	0	0	0	0	0	0	0	0	0	0	6.44464e-05	0	0	0	0	0	0	0	0	0	0	0	0	0	0	0	0	0	0	0	0
Otu331538	0	0	0	0	0	0	0	0	0	0	0	0	0	0	0	0	0	0	0	0	0	0	0	0	0	0	0	0	6.44464e-05	0	0	0	0	0	0	0	0	0	0	0	0	0	0	0	0	0	0	0	0
unclassified	0	0	0	0	0	4.98137e-06	0	0	9.32684e-06	0	0	0	0	0	4.42229e-06	0	0	0	0	4.45012e-06	0	0	0	0	0	0	0	0	0.00867548	0	0	0	0	0	0	0	0	0	2.02758e-05	0	0	0	0	4.74442e-06	0	0	0	0	0
Otu349449	0	0	0	0	0	0	0	0	0	0	0	0	0	0	0	0	0	0	0	0	0	0	0	0	0	0	0	0	9.41909e-05	0	0	0	0	0	0	0	0	0	0	0	0	0	0	0	0	0	0	0	0
Otu354540	0	0	0	0	0	0	0	0	9.32684e-06	0	0	0	0	0	4.42229e-06	0	0	0	0	4.45012e-06	0	0	0	0	0	0	0	0	0.0084871	0	0	0	0	0	0	0	0	0	0	0	0	0	0	4.74442e-06	0	0	0	0	0
Otu36276	0	0	0	0	0	4.98137e-06	0	0	0	0	0	0	0	0	0	0	0	0	0	0	0	0	0	0	0	0	0	0	9.41909e-05	0	0	0	0	0	0	0	0	0	2.02758e-05	0	0	0	0	0	0	0	0	0	0
Clostridiaceae 2	0	0	0	0	0	0	0	0	0	0	0	0	0	0	0	0	0	0	0	0	0	0	0	0	0	0	0	0	0.000277615	0	0	0	0	0	0	0	0	0	0	0	0	0	0	0	0	0	0	0	0
Alkaliphilus	0	0	0	0	0	0	0	0	0	0	0	0	0	0	0	0	0	0	0	0	0	0	0	0	0	0	0	0	0.000277615	0	0	0	0	0	0	0	0	0	0	0	0	0	0	0	0	0	0	0	0
Otu531850	0	0	0	0	0	0	0	0	0	0	0	0	0	0	0	0	0	0	0	0	0	0	0	0	0	0	0	0	0.000277615	0	0	0	0	0	0	0	0	0	0	0	0	0	0	0	0	0	0	0	0
Clostridiales_Incertae Sedis XI	0	0	0	0	0	0	0	5.54695e-05	0	0	4.88632e-06	0	4.62366e-06	4.6243e-06	0	1.33637e-05	0	0	0	0	0	0	0	0	0	0	0	0	0.00205237	0	0	0	0	0	0	0	0	0	0	4.77952e-06	0	0	0	0	0	0	0	0	0
Anaerococcus	0	0	0	0	0	0	0	1.84898e-05	0	0	0	0	4.62366e-06	4.6243e-06	0	8.90916e-06	0	0	0	0	0	0	0	0	0	0	0	0	6.44464e-05	0	0	0	0	0	0	0	0	0	0	4.77952e-06	0	0	0	0	0	0	0	0	0
Otu354877	0	0	0	0	0	0	0	1.84898e-05	0	0	0	0	4.62366e-06	4.6243e-06	0	8.90916e-06	0	0	0	0	0	0	0	0	0	0	0	0	6.44464e-05	0	0	0	0	0	0	0	0	0	0	4.77952e-06	0	0	0	0	0	0	0	0	0
Parvimonas	0	0	0	0	0	0	0	0	0	0	0	0	0	0	0	0	0	0	0	0	0	0	0	0	0	0	0	0	0.000178467	0	0	0	0	0	0	0	0	0	0	0	0	0	0	0	0	0	0	0	0
Otu531852	0	0	0	0	0	0	0	0	0	0	0	0	0	0	0	0	0	0	0	0	0	0	0	0	0	0	0	0	0.000178467	0	0	0	0	0	0	0	0	0	0	0	0	0	0	0	0	0	0	0	0
Sedimentibacter	0	0	0	0	0	0	0	0	0	0	0	0	0	0	0	0	0	0	0	0	0	0	0	0	0	0	0	0	0.000565145	0	0	0	0	0	0	0	0	0	0	0	0	0	0	0	0	0	0	0	0
Otu531849	0	0	0	0	0	0	0	0	0	0	0	0	0	0	0	0	0	0	0	0	0	0	0	0	0	0	0	0	0.000565145	0	0	0	0	0	0	0	0	0	0	0	0	0	0	0	0	0	0	0	0
Tissierella	0	0	0	0	0	0	0	0	0	0	0	0	0	0	0	0	0	0	0	0	0	0	0	0	0	0	0	0	9.41909e-05	0	0	0	0	0	0	0	0	0	0	0	0	0	0	0	0	0	0	0	0
Otu530755	0	0	0	0	0	0	0	0	0	0	0	0	0	0	0	0	0	0	0	0	0	0	0	0	0	0	0	0	9.41909e-05	0	0	0	0	0	0	0	0	0	0	0	0	0	0	0	0	0	0	0	0
unclassified	0	0	0	0	0	0	0	3.69797e-05	0	0	4.88632e-06	0	0	0	0	4.45458e-06	0	0	0	0	0	0	0	0	0	0	0	0	0.00115012	0	0	0	0	0	0	0	0	0	0	0	0	0	0	0	0	0	0	0	0
Otu530738	0	0	0	0	0	0	0	2.31123e-05	0	0	4.88632e-06	0	0	0	0	4.45458e-06	0	0	0	0	0	0	0	0	0	0	0	0	0.000996441	0	0	0	0	0	0	0	0	0	0	0	0	0	0	0	0	0	0	0	0
Otu531855	0	0	0	0	0	0	0	0	0	0	0	0	0	0	0	0	0	0	0	0	0	0	0	0	0	0	0	0	7.93187e-05	0	0	0	0	0	0	0	0	0	0	0	0	0	0	0	0	0	0	0	0
Otu531856	0	0	0	0	0	0	0	1.38674e-05	0	0	0	0	0	0	0	0	0	0	0	0	0	0	0	0	0	0	0	0	7.43612e-05	0	0	0	0	0	0	0	0	0	0	0	0	0	0	0	0	0	0	0	0
Clostridiales_Incertae Sedis XII	0	0	0	0	0	0	0	0	0	0	0	0	0	0	0	0	0	0	0	0	0	0	0	0	0	0	0	0	0.000198297	0	0	0	0	0	0	0	0	0	0	0	0	0	0	0	0	0	0	0	0
Guggenheimella	0	0	0	0	0	0	0	0	0	0	0	0	0	0	0	0	0	0	0	0	0	0	0	0	0	0	0	0	0.000198297	0	0	0	0	0	0	0	0	0	0	0	0	0	0	0	0	0	0	0	0
Otu531851	0	0	0	0	0	0	0	0	0	0	0	0	0	0	0	0	0	0	0	0	0	0	0	0	0	0	0	0	0.000198297	0	0	0	0	0	0	0	0	0	0	0	0	0	0	0	0	0	0	0	0
Clostridiales_Incertae Sedis XIII	0	0	0	0	0	0	0	0	0	0	0	0	0	0	0	0	0	0	0	0	0	0	0	0	0	0	0	0	8.92335e-05	0	0	0	0	0	0	0	0	0	0	0	0	0	0	0	0	0	0	0	0
Anaerovorax	0	0	0	0	0	0	0	0	0	0	0	0	0	0	0	0	0	0	0	0	0	0	0	0	0	0	0	0	8.92335e-05	0	0	0	0	0	0	0	0	0	0	0	0	0	0	0	0	0	0	0	0
Otu331530	0	0	0	0	0	0	0	0	0	0	0	0	0	0	0	0	0	0	0	0	0	0	0	0	0	0	0	0	8.92335e-05	0	0	0	0	0	0	0	0	0	0	0	0	0	0	0	0	0	0	0	0
Gracilibacteraceae	0	0	0	0	0	0	0	0	0	0	0	0	0	0	0	0	0	0	0	0	0	0	0	0	0	0	0	0	0.00028753	0	0	0	0	0	0	0	0	0	5.06894e-06	0	0	0	0	0	0	0	0	0	0
Lutispora	0	0	0	0	0	0	0	0	0	0	0	0	0	0	0	0	0	0	0	0	0	0	0	0	0	0	0	0	0.00028753	0	0	0	0	0	0	0	0	0	5.06894e-06	0	0	0	0	0	0	0	0	0	0
Otu530208	0	0	0	0	0	0	0	0	0	0	0	0	0	0	0	0	0	0	0	0	0	0	0	0	0	0	0	0	0.000218126	0	0	0	0	0	0	0	0	0	0	0	0	0	0	0	0	0	0	0	0
Otu530763	0	0	0	0	0	0	0	0	0	0	0	0	0	0	0	0	0	0	0	0	0	0	0	0	0	0	0	0	6.94038e-05	0	0	0	0	0	0	0	0	0	5.06894e-06	0	0	0	0	0	0	0	0	0	0
Lachnospiraceae	1.85272e-05	9.68139e-06	9.53225e-06	5.56888e-05	8.63177e-05	1.99255e-05	1.78566e-05	0.000462246	3.73073e-05	0.000279138	1.95453e-05	1.73404e-05	7.86022e-05	9.2486e-06	1.32669e-05	2.67275e-05	4.61072e-06	5.0804e-06	4.333e-06	0	5.05094e-06	0	0	5.11015e-06	1.41991e-05	1.40204e-05	4.47852e-06	5.44848e-05	0.00046104	0	6.45504e-05	1.91234e-05	4.74172e-06	1.42071e-05	1.01717e-05	0.00012279	2.02114e-05	1.48869e-05	0.000101379	3.34566e-05	2.49888e-05	2.28769e-05	1.45387e-05	4.74442e-05	2.24179e-05	1.00566e-05	4.79614e-06	7.92297e-05	0
Coprococcus	0	0	0	0	0	0	5.9522e-06	5.54695e-05	0	0	0	0	0	0	0	0	0	0	0	0	0	0	0	0	0	0	0	4.95317e-06	4.95742e-06	0	0	0	0	0	0	0	5.05285e-06	0	0	0	0	0	0	0	0	0	0	0	0
Otu366457	0	0	0	0	0	0	5.9522e-06	5.54695e-05	0	0	0	0	0	0	0	0	0	0	0	0	0	0	0	0	0	0	0	4.95317e-06	4.95742e-06	0	0	0	0	0	0	0	5.05285e-06	0	0	0	0	0	0	0	0	0	0	0	0
Parasporobacterium	0	0	0	0	0	0	0	0	0	0	0	0	0	0	0	0	0	0	0	0	0	0	0	0	0	0	0	0	3.47019e-05	0	0	0	0	0	0	0	0	0	0	0	0	0	0	0	0	0	0	0	0
Otu531865	0	0	0	0	0	0	0	0	0	0	0	0	0	0	0	0	0	0	0	0	0	0	0	0	0	0	0	0	3.47019e-05	0	0	0	0	0	0	0	0	0	0	0	0	0	0	0	0	0	0	0	0
Robinsoniella	0	0	0	0	0	0	0	6.0092e-05	0	0	0	0	0	0	0	0	0	0	0	0	0	0	0	0	0	0	0	0	4.95742e-06	0	4.96542e-06	0	0	0	0	0	0	0	0	0	0	0	0	0	0	0	0	0	0
Otu337614	0	0	0	0	0	0	0	6.0092e-05	0	0	0	0	0	0	0	0	0	0	0	0	0	0	0	0	0	0	0	0	4.95742e-06	0	4.96542e-06	0	0	0	0	0	0	0	0	0	0	0	0	0	0	0	0	0	0
Roseburia	1.38954e-05	9.68139e-06	9.53225e-06	4.64074e-05	8.15223e-05	1.49441e-05	1.19044e-05	0.000305082	2.79805e-05	6.1505e-05	1.4659e-05	1.73404e-05	2.77419e-05	4.6243e-06	1.32669e-05	2.67275e-05	4.61072e-06	0	4.333e-06	0	0	0	0	5.11015e-06	1.41991e-05	1.40204e-05	4.47852e-06	4.95317e-05	0.000188382	0	3.97233e-05	1.43425e-05	4.74172e-06	1.42071e-05	1.01717e-05	5.00257e-05	1.51586e-05	1.48869e-05	2.53447e-05	3.34566e-05	1.49933e-05	1.37261e-05	1.45387e-05	3.32109e-05	4.48358e-06	1.00566e-05	4.79614e-06	1.86423e-05	0
Otu343478	1.38954e-05	9.68139e-06	4.76613e-06	4.17666e-05	7.19314e-05	1.49441e-05	0	0.000254235	2.79805e-05	6.1505e-05	1.4659e-05	1.73404e-05	2.31183e-05	0	0	2.22729e-05	4.61072e-06	0	4.333e-06	0	0	0	0	5.11015e-06	1.41991e-05	9.34693e-06	4.47852e-06	3.96253e-05	0.000128893	0	3.47579e-05	0	0	1.42071e-05	1.01717e-05	4.09301e-05	1.01057e-05	4.96231e-06	2.02758e-05	2.38976e-05	9.9955e-06	1.37261e-05	1.45387e-05	1.42333e-05	0	1.00566e-05	4.79614e-06	9.32114e-06	0
Otu344391	0	0	4.76613e-06	4.64074e-06	9.59085e-06	0	1.19044e-05	5.08471e-05	0	0	0	0	4.62366e-06	4.6243e-06	1.32669e-05	4.45458e-06	0	0	0	0	0	0	0	0	0	4.67347e-06	0	9.90634e-06	5.9489e-05	0	4.96542e-06	1.43425e-05	4.74172e-06	0	0	9.09558e-06	5.05285e-06	9.92462e-06	5.06894e-06	9.55904e-06	4.99775e-06	0	0	1.89777e-05	4.48358e-06	0	0	9.32114e-06	0
unclassified	4.6318e-06	0	0	9.28147e-06	4.79543e-06	4.98137e-06	0	4.16021e-05	9.32684e-06	0.000217633	4.88632e-06	0	5.08602e-05	4.6243e-06	0	0	0	5.0804e-06	0	0	5.05094e-06	0	0	0	0	0	0	0	0.000228041	0	1.98617e-05	4.78085e-06	0	0	0	7.27646e-05	0	0	7.60341e-05	0	9.9955e-06	9.15076e-06	0	1.42333e-05	1.79343e-05	0	0	6.05874e-05	0
Otu337609	0	0	0	0	0	0	0	0	0	0	0	0	0	0	0	0	0	0	0	0	0	0	0	0	0	0	0	0	0	0	0	0	0	0	0	5.45735e-05	0	0	7.09651e-05	0	0	0	0	1.42333e-05	1.79343e-05	0	0	4.66057e-05	0
Otu343555	0	0	0	0	0	0	0	0	0	0	0	0	0	0	0	0	0	0	0	0	0	0	0	0	0	0	0	0	0	0	0	0	0	0	0	0	0	0	0	0	0	0	0	0	0	0	0	0	0
Otu343824	4.6318e-06	0	0	9.28147e-06	4.79543e-06	4.98137e-06	0	0	9.32684e-06	0	4.88632e-06	0	5.08602e-05	4.6243e-06	0	0	0	5.0804e-06	0	0	5.05094e-06	0	0	0	0	0	0	0	2.47871e-05	0	4.96542e-06	4.78085e-06	0	0	0	1.81912e-05	0	0	5.06894e-06	0	0	9.15076e-06	0	0	0	0	0	1.39817e-05	0
Otu530209	0	0	0	0	0	0	0	0	0	0.000217633	0	0	0	0	0	0	0	0	0	0	0	0	0	0	0	0	0	0	0	0	0	0	0	0	0	0	0	0	0	0	0	0	0	0	0	0	0	0	0
Otu530215	0	0	0	0	0	0	0	4.16021e-05	0	0	0	0	0	0	0	0	0	0	0	0	0	0	0	0	0	0	0	0	0.000203254	0	1.48962e-05	0	0	0	0	0	0	0	0	0	9.9955e-06	0	0	0	0	0	0	0	0
Peptococcaceae 1	0	0	0	0	0	0	0	0	0	0	0	0	0	0	0	0	0	0	0	0	0	0	0	0	0	0	0	0	0.000114021	0	0	0	0	0	0	0	0	0	0	0	0	0	0	0	0	0	0	0	0
unclassified	0	0	0	0	0	0	0	0	0	0	0	0	0	0	0	0	0	0	0	0	0	0	0	0	0	0	0	0	0.000114021	0	0	0	0	0	0	0	0	0	0	0	0	0	0	0	0	0	0	0	0
Otu530750	0	0	0	0	0	0	0	0	0	0	0	0	0	0	0	0	0	0	0	0	0	0	0	0	0	0	0	0	0.000114021	0	0	0	0	0	0	0	0	0	0	0	0	0	0	0	0	0	0	0	0
Peptococcaceae 2	0	0	0	0	0	0	0	0	0	0	0	0	0	0	0	0	0	0	0	0	0	0	0	0	0	0	0	0	6.94038e-05	0	0	0	0	0	0	0	0	0	0	0	0	0	0	0	0	0	0	0	0
Cryptanaerobacter	0	0	0	0	0	0	0	0	0	0	0	0	0	0	0	0	0	0	0	0	0	0	0	0	0	0	0	0	6.94038e-05	0	0	0	0	0	0	0	0	0	0	0	0	0	0	0	0	0	0	0	0
Otu530767	0	0	0	0	0	0	0	0	0	0	0	0	0	0	0	0	0	0	0	0	0	0	0	0	0	0	0	0	6.94038e-05	0	0	0	0	0	0	0	0	0	0	0	0	0	0	0	0	0	0	0	0
Peptoniphilaceae	0	0	0	0	0	0	0	0	0	4.73115e-06	0	0	0	0	0	0	0	0	0	0	0	0	0	0	0	0	0	0	0.00030736	0	0	0	0	0	0	2.2739e-05	0	0	0	0	0	0	0	0	0	0	0	0	0
Anaerosphaera	0	0	0	0	0	0	0	0	0	4.73115e-06	0	0	0	0	0	0	0	0	0	0	0	0	0	0	0	0	0	0	0.00030736	0	0	0	0	0	0	2.2739e-05	0	0	0	0	0	0	0	0	0	0	0	0	0
Otu367276	0	0	0	0	0	0	0	0	0	4.73115e-06	0	0	0	0	0	0	0	0	0	0	0	0	0	0	0	0	0	0	0.00030736	0	0	0	0	0	0	2.2739e-05	0	0	0	0	0	0	0	0	0	0	0	0	0
Peptostreptococcaceae	4.6318e-06	0	0	4.64074e-06	0	2.49068e-05	0	0	4.66342e-06	1.89246e-05	0	0	9.24731e-06	0	0	4.45458e-06	0	0	4.333e-06	0	0	0	0	0	0	0	0	0	0.00246384	0	4.96542e-06	0	0	4.7357e-06	0	2.2739e-05	0	9.92462e-06	5.06894e-06	9.55904e-06	0	1.83015e-05	0	0.000232476	0	0	0	0	0
Intestinibacter	0	0	0	0	0	0	0	0	0	0	0	0	0	0	0	0	0	0	0	0	0	0	0	0	0	0	0	0	0.000208211	0	0	0	0	0	0	0	0	0	0	0	0	0	0	0	0	0	0	0	0
Otu531854	0	0	0	0	0	0	0	0	0	0	0	0	0	0	0	0	0	0	0	0	0	0	0	0	0	0	0	0	0.000208211	0	0	0	0	0	0	0	0	0	0	0	0	0	0	0	0	0	0	0	0
Romboutsia	4.6318e-06	0	0	4.64074e-06	0	2.49068e-05	0	0	4.66342e-06	1.41935e-05	0	0	9.24731e-06	0	0	4.45458e-06	0	0	0	0	0	0	0	0	0	0	0	0	0.000480869	0	0	0	0	0	0	9.09558e-06	0	9.92462e-06	5.06894e-06	0	0	1.83015e-05	0	0.000222988	0	0	0	0	0
Otu349447	4.6318e-06	0	0	4.64074e-06	0	2.49068e-05	0	0	4.66342e-06	1.41935e-05	0	0	9.24731e-06	0	0	4.45458e-06	0	0	0	0	0	0	0	0	0	0	0	0	0.000480869	0	0	0	0	0	0	9.09558e-06	0	9.92462e-06	5.06894e-06	0	0	1.83015e-05	0	0.000222988	0	0	0	0	0
Sporacetigenium	0	0	0	0	0	0	0	0	0	0	0	0	0	0	0	0	0	0	0	0	0	0	0	0	0	0	0	0	0.000109063	0	0	0	0	0	0	0	0	0	0	0	0	0	0	0	0	0	0	0	0
Otu343481	0	0	0	0	0	0	0	0	0	0	0	0	0	0	0	0	0	0	0	0	0	0	0	0	0	0	0	0	0.000109063	0	0	0	0	0	0	0	0	0	0	0	0	0	0	0	0	0	0	0	0
Terrisporobacter	0	0	0	0	0	0	0	0	0	4.73115e-06	0	0	0	0	0	0	0	0	4.333e-06	0	0	0	0	0	0	0	0	0	0.00166569	0	4.96542e-06	0	0	4.7357e-06	0	1.36434e-05	0	0	0	9.55904e-06	0	0	0	9.48884e-06	0	0	0	0	0
Otu354773	0	0	0	0	0	0	0	0	0	4.73115e-06	0	0	0	0	0	0	0	0	4.333e-06	0	0	0	0	0	0	0	0	0	0.00166569	0	4.96542e-06	0	0	4.7357e-06	0	1.36434e-05	0	0	0	9.55904e-06	0	0	0	9.48884e-06	0	0	0	0	0
Ruminococcaceae	1.38954e-05	1.45221e-05	1.42984e-05	6.49703e-05	0.000110295	3.9851e-05	1.78566e-05	0.000476113	5.5961e-05	8.04296e-05	6.35222e-05	4.3351e-05	9.70968e-05	3.69944e-05	3.98006e-05	7.12733e-05	2.76643e-05	0	2.1665e-05	1.33504e-05	0	3.20516e-05	9.86057e-06	0	9.46607e-06	4.67347e-05	0	0	0.0043774	4.8144e-06	7.44812e-05	2.39042e-05	1.89669e-05	4.7357e-06	0	0.000118243	1.51586e-05	9.92462e-06	6.08273e-05	3.34566e-05	4.49798e-05	0.000146412	2.42311e-05	5.21886e-05	8.96716e-06	4.52546e-05	2.87768e-05	3.72846e-05	4.74989e-06
Anaerotruncus	0	0	0	0	0	0	0	0	0	0	0	0	0	0	0	0	0	0	4.333e-06	0	0	0	0	0	0	0	0	0	0	0	0	0	0	0	0	0	0	0	0	0	0	0	0	0	0	0	0	0	0
Otu354546	0	0	0	0	0	0	0	0	0	0	0	0	0	0	0	0	0	0	4.333e-06	0	0	0	0	0	0	0	0	0	0	0	0	0	0	0	0	0	0	0	0	0	0	0	0	0	0	0	0	0	0
Clostridium III	0	0	4.76613e-06	0	9.59085e-06	4.98137e-06	0	9.24492e-06	0	4.73115e-06	9.77264e-06	1.30053e-05	9.24731e-06	0	8.84459e-06	8.90916e-06	4.61072e-06	0	0	0	0	4.5788e-06	9.86057e-06	0	4.73303e-06	1.86939e-05	0	0	0.00161116	0	9.93083e-06	4.78085e-06	0	0	0	1.81912e-05	5.05285e-06	4.96231e-06	5.06894e-06	1.43386e-05	9.9955e-06	3.66031e-05	9.69246e-06	1.89777e-05	8.96716e-06	2.01131e-05	9.59228e-06	4.66057e-06	0
Otu324099	0	0	4.76613e-06	0	9.59085e-06	4.98137e-06	0	9.24492e-06	0	4.73115e-06	9.77264e-06	8.67021e-06	9.24731e-06	0	8.84459e-06	8.90916e-06	4.61072e-06	0	0	0	0	4.5788e-06	9.86057e-06	0	0	9.34693e-06	0	0	0.000738655	0	9.93083e-06	0	0	0	0	9.09558e-06	0	4.96231e-06	0	9.55904e-06	0	1.37261e-05	9.69246e-06	9.48884e-06	4.48358e-06	2.01131e-05	9.59228e-06	4.66057e-06	0
Otu337611	0	0	0	0	0	0	0	0	0	0	0	0	0	0	0	0	0	0	0	0	0	0	0	0	0	0	0	0	0	0	0	0	0	0	0	0	0	0	5.06894e-06	0	9.9955e-06	0	0	0	0	0	0	0	0
Otu338122	0	0	0	0	0	0	0	0	0	0	0	4.3351e-06	0	0	0	0	0	0	0	0	0	0	0	0	0	9.34693e-06	0	0	8.92335e-05	0	0	0	0	0	0	4.54779e-06	5.05285e-06	0	0	0	0	4.57538e-06	0	9.48884e-06	4.48358e-06	0	0	0	0
Otu357875	0	0	0	0	0	0	0	0	0	0	0	0	0	0	0	0	0	0	0	0	0	0	0	0	4.73303e-06	0	0	0	0.00057506	0	0	4.78085e-06	0	0	0	0	0	0	0	4.77952e-06	0	1.83015e-05	0	0	0	0	0	0	0
Otu379888	0	0	0	0	0	0	0	0	0	0	0	0	0	0	0	0	0	0	0	0	0	0	0	0	0	0	0	0	0.000138808	0	0	0	0	0	0	0	0	0	0	0	0	0	0	0	0	0	0	0	0
Otu530762	0	0	0	0	0	0	0	0	0	0	0	0	0	0	0	0	0	0	0	0	0	0	0	0	0	0	0	0	6.94038e-05	0	0	0	0	0	0	4.54779e-06	0	0	0	0	0	0	0	0	0	0	0	0	0
Clostridium IV	0	0	0	0	0	0	0	0	0	6.1505e-05	0	0	0	0	0	0	0	0	0	0	0	0	0	0	0	0	0	0	0	0	0	0	0	0	0	0	0	0	0	0	0	0	0	0	0	0	0	0	0
Otu530771	0	0	0	0	0	0	0	0	0	6.1505e-05	0	0	0	0	0	0	0	0	0	0	0	0	0	0	0	0	0	0	0	0	0	0	0	0	0	0	0	0	0	0	0	0	0	0	0	0	0	0	0
Faecalibacterium	1.38954e-05	1.45221e-05	9.53225e-06	4.64074e-05	0.000100704	2.49068e-05	1.78566e-05	0.000429889	5.5961e-05	1.41935e-05	5.37495e-05	3.03457e-05	8.78495e-05	3.69944e-05	3.09561e-05	6.23641e-05	2.30536e-05	0	1.7332e-05	1.33504e-05	0	2.74728e-05	0	0	4.73303e-06	2.80408e-05	0	0	0.000376764	4.8144e-06	6.45504e-05	1.91234e-05	1.89669e-05	4.7357e-06	0	0.000100051	1.01057e-05	4.96231e-06	3.54826e-05	1.91181e-05	2.99865e-05	0.000109809	1.45387e-05	3.32109e-05	0	2.51414e-05	1.91846e-05	3.2624e-05	4.74989e-06
Otu343464	1.38954e-05	1.45221e-05	9.53225e-06	4.64074e-05	0.000100704	2.49068e-05	1.78566e-05	0.000429889	5.5961e-05	1.41935e-05	5.37495e-05	3.03457e-05	8.78495e-05	3.69944e-05	3.09561e-05	6.23641e-05	2.30536e-05	0	1.7332e-05	1.33504e-05	0	2.74728e-05	0	0	4.73303e-06	2.80408e-05	0	0	0.000376764	4.8144e-06	6.45504e-05	1.91234e-05	1.89669e-05	4.7357e-06	0	0.000100051	1.01057e-05	4.96231e-06	3.54826e-05	1.91181e-05	2.99865e-05	0.000109809	1.45387e-05	3.32109e-05	0	2.51414e-05	1.91846e-05	3.2624e-05	4.74989e-06
Papillibacter	0	0	0	0	0	0	0	0	0	0	0	0	0	0	0	0	0	0	0	0	0	0	0	0	0	0	0	0	9.41909e-05	0	0	0	0	0	0	0	0	0	0	0	0	0	0	0	0	0	0	0	0
Otu530753	0	0	0	0	0	0	0	0	0	0	0	0	0	0	0	0	0	0	0	0	0	0	0	0	0	0	0	0	9.41909e-05	0	0	0	0	0	0	0	0	0	0	0	0	0	0	0	0	0	0	0	0
Pseudoflavonifractor	0	0	0	4.64074e-06	0	0	0	0	0	0	0	0	0	0	0	0	0	0	0	0	0	0	0	0	0	0	0	0	4.95742e-06	0	0	0	0	0	0	0	0	0	1.01379e-05	0	0	0	0	0	0	0	0	0	0
Otu329880	0	0	0	4.64074e-06	0	0	0	0	0	0	0	0	0	0	0	0	0	0	0	0	0	0	0	0	0	0	0	0	4.95742e-06	0	0	0	0	0	0	0	0	0	1.01379e-05	0	0	0	0	0	0	0	0	0	0
Saccharofermentans	0	0	0	1.39222e-05	0	0	0	0	0	0	0	0	0	0	0	0	0	0	0	0	0	0	0	0	0	0	0	0	9.91483e-05	0	0	0	0	0	0	0	0	0	0	0	0	0	0	0	0	0	0	0	0
Otu530754	0	0	0	1.39222e-05	0	0	0	0	0	0	0	0	0	0	0	0	0	0	0	0	0	0	0	0	0	0	0	0	9.91483e-05	0	0	0	0	0	0	0	0	0	0	0	0	0	0	0	0	0	0	0	0
unclassified	0	0	0	0	0	9.96274e-06	0	3.69797e-05	0	0	0	0	0	0	0	0	0	0	0	0	0	0	0	0	0	0	0	0	0.00219118	0	0	0	0	0	0	0	0	0	1.01379e-05	0	4.99775e-06	0	0	0	0	0	0	0	0
Otu354541	0	0	0	0	0	0	0	0	0	0	0	0	0	0	0	0	0	0	0	0	0	0	0	0	0	0	0	0	0	0	0	0	0	0	0	0	0	0	0	0	0	0	0	0	0	0	0	0	0
Otu36271	0	0	0	0	0	9.96274e-06	0	0	0	0	0	0	0	0	0	0	0	0	0	0	0	0	0	0	0	0	0	0	0.00202758	0	0	0	0	0	0	0	0	0	1.01379e-05	0	4.99775e-06	0	0	0	0	0	0	0	0
Otu530734	0	0	0	0	0	0	0	3.69797e-05	0	0	0	0	0	0	0	0	0	0	0	0	0	0	0	0	0	0	0	0	0.000163595	0	0	0	0	0	0	0	0	0	0	0	0	0	0	0	0	0	0	0	0
Syntrophomonadaceae	0	4.84069e-06	4.76613e-06	0	4.79543e-06	4.98137e-06	0	0	0	4.73115e-06	1.4659e-05	0	0	0	0	0	0	0	0	4.45012e-06	0	0	0	0	0	0	0	0	0.00136825	0	9.93083e-06	4.78085e-06	0	0	0	1.36434e-05	5.05285e-06	4.96231e-06	5.06894e-06	4.77952e-06	4.99775e-06	0	0	9.48884e-06	0	0	9.59228e-06	4.66057e-06	0
Pelospora	0	0	0	0	0	4.98137e-06	0	0	0	0	0	0	0	0	0	0	0	0	0	0	0	0	0	0	0	0	0	0	0.00102619	0	0	0	0	0	0	0	0	0	0	4.77952e-06	0	0	0	0	0	0	4.79614e-06	0	0
Otu36285	0	0	0	0	0	0	0	0	0	0	0	0	0	0	0	0	0	0	0	0	0	0	0	0	0	0	0	0	0.000560188	0	0	0	0	0	0	0	0	0	0	4.77952e-06	0	0	0	0	0	0	0	0	0
Otu64342	0	0	0	0	0	4.98137e-06	0	0	0	0	0	0	0	0	0	0	0	0	0	0	0	0	0	0	0	0	0	0	0.000465997	0	0	0	0	0	0	0	0	0	0	0	0	0	0	0	0	0	4.79614e-06	0	0
Syntrophomonas	0	0	0	0	0	0	0	0	0	0	4.88632e-06	0	0	0	0	0	0	0	0	0	0	0	0	0	0	0	0	0	0.000237956	0	0	0	0	0	0	0	0	0	0	0	0	0	0	0	0	0	0	0	0
Otu530742	0	0	0	0	0	0	0	0	0	0	4.88632e-06	0	0	0	0	0	0	0	0	0	0	0	0	0	0	0	0	0	0.000237956	0	0	0	0	0	0	0	0	0	0	0	0	0	0	0	0	0	0	0	0
unclassified	0	4.84069e-06	4.76613e-06	0	4.79543e-06	0	0	0	0	4.73115e-06	9.77264e-06	0	0	0	0	0	0	0	0	4.45012e-06	0	0	0	0	0	0	0	0	0.000104106	0	9.93083e-06	4.78085e-06	0	0	0	1.36434e-05	5.05285e-06	4.96231e-06	5.06894e-06	0	4.99775e-06	0	0	9.48884e-06	0	0	4.79614e-06	4.66057e-06	0
Otu327	0	4.84069e-06	4.76613e-06	0	4.79543e-06	0	0	0	0	4.73115e-06	9.77264e-06	0	0	0	0	0	0	0	0	4.45012e-06	0	0	0	0	0	0	0	0	0.000104106	0	9.93083e-06	4.78085e-06	0	0	0	1.36434e-05	5.05285e-06	4.96231e-06	5.06894e-06	0	4.99775e-06	0	0	9.48884e-06	0	0	4.79614e-06	4.66057e-06	0
unclassified	2.3159e-05	4.84069e-06	0	2.78444e-05	2.87726e-05	4.98137e-06	2.38088e-05	3.23572e-05	0	4.73115e-06	1.4659e-05	4.3351e-06	1.3871e-05	1.84972e-05	3.09561e-05	2.67275e-05	2.76643e-05	0	0	4.45012e-06	0	9.15759e-06	4.93029e-06	0	0	0	0	0	0.0012691	9.62881e-06	1.48962e-05	1.43425e-05	0	1.42071e-05	1.01717e-05	8.18602e-05	0	4.96231e-06	1.52068e-05	9.55904e-06	1.49933e-05	0.00011896	0	0.000132844	1.79343e-05	1.50849e-05	4.79614e-06	1.39817e-05	0
unclassified	2.3159e-05	4.84069e-06	0	2.78444e-05	2.87726e-05	4.98137e-06	2.38088e-05	3.23572e-05	0	4.73115e-06	1.4659e-05	4.3351e-06	1.3871e-05	1.84972e-05	3.09561e-05	2.67275e-05	2.76643e-05	0	0	4.45012e-06	0	9.15759e-06	4.93029e-06	0	0	0	0	0	0.0012691	9.62881e-06	1.48962e-05	1.43425e-05	0	1.42071e-05	1.01717e-05	8.18602e-05	0	4.96231e-06	1.52068e-05	9.55904e-06	1.49933e-05	0.00011896	0	0.000132844	1.79343e-05	1.50849e-05	4.79614e-06	1.39817e-05	0
Otu267221	1.85272e-05	4.84069e-06	0	2.78444e-05	2.87726e-05	4.98137e-06	2.38088e-05	3.23572e-05	0	4.73115e-06	9.77264e-06	4.3351e-06	1.3871e-05	1.84972e-05	3.09561e-05	2.67275e-05	2.76643e-05	0	0	4.45012e-06	0	9.15759e-06	4.93029e-06	0	0	0	0	0	5.9489e-05	9.62881e-06	1.48962e-05	9.56169e-06	0	1.42071e-05	1.01717e-05	8.18602e-05	0	4.96231e-06	1.01379e-05	9.55904e-06	1.49933e-05	0.000114385	0	6.64219e-05	1.79343e-05	1.50849e-05	4.79614e-06	1.39817e-05	0
Otu324051	0	0	0	0	0	0	0	0	0	0	0	0	0	0	0	0	0	0	0	0	0	0	0	0	0	0	0	0	9.41909e-05	0	0	0	0	0	0	0	0	0	0	0	0	0	0	0	0	0	0	0	0
Otu337613	0	0	0	0	0	0	0	0	0	0	0	0	0	0	0	0	0	0	0	0	0	0	0	0	0	0	0	0	0	0	0	0	0	0	0	0	0	0	0	0	0	0	0	6.64219e-05	0	0	0	0	0
Otu350459	0	0	0	0	0	0	0	0	0	0	0	0	0	0	0	0	0	0	0	0	0	0	0	0	0	0	0	0	5.45316e-05	0	0	0	0	0	0	0	0	0	0	0	0	0	0	0	0	0	0	0	0
Otu530740	0	0	0	0	0	0	0	0	0	0	4.88632e-06	0	0	0	0	0	0	0	0	0	0	0	0	0	0	0	0	0	0.000396593	0	0	0	0	0	0	0	0	0	5.06894e-06	0	0	0	0	0	0	0	0	0	0
Otu530749	0	0	0	0	0	0	0	0	0	0	0	0	0	0	0	0	0	0	0	0	0	0	0	0	0	0	0	0	0.000114021	0	0	0	0	0	0	0	0	0	0	0	0	0	0	0	0	0	0	0	0
Otu530756	0	0	0	0	0	0	0	0	0	0	0	0	0	0	0	0	0	0	0	0	0	0	0	0	0	0	0	0	9.41909e-05	0	0	0	0	0	0	0	0	0	0	0	0	0	0	0	0	0	0	0	0
Otu530760	4.6318e-06	0	0	0	0	0	0	0	0	0	0	0	0	0	0	0	0	0	0	0	0	0	0	0	0	0	0	0	0.000114021	0	0	4.78085e-06	0	0	0	0	0	0	0	0	0	4.57538e-06	0	0	0	0	0	0	0
Otu530765	0	0	0	0	0	0	0	0	0	0	0	0	0	0	0	0	0	0	0	0	0	0	0	0	0	0	0	0	7.93187e-05	0	0	0	0	0	0	0	0	0	0	0	0	0	0	0	0	0	0	0	0
Otu530769	0	0	0	0	0	0	0	0	0	0	0	0	0	0	0	0	0	0	0	0	0	0	0	0	0	0	0	0	0.000104106	0	0	0	0	0	0	0	0	0	0	0	0	0	0	0	0	0	0	0	0
Otu531853	0	0	0	0	0	0	0	0	0	0	0	0	0	0	0	0	0	0	0	0	0	0	0	0	0	0	0	0	0.000158637	0	0	0	0	0	0	0	0	0	0	0	0	0	0	0	0	0	0	0	0
Natranaerobiales	0	0	0	0	0	0	0	0	0	0	0	0	0	1.38729e-05	0	0	0	0	0	0	0	0	0	0	0	0	0	0	5.9489e-05	0	0	0	0	0	0	1.81912e-05	0	0	0	0	0	0	0	0	0	0	0	0	0
Natranaerobiaceae	0	0	0	0	0	0	0	0	0	0	0	0	0	1.38729e-05	0	0	0	0	0	0	0	0	0	0	0	0	0	0	5.9489e-05	0	0	0	0	0	0	1.81912e-05	0	0	0	0	0	0	0	0	0	0	0	0	0
Dethiobacter	0	0	0	0	0	0	0	0	0	0	0	0	0	1.38729e-05	0	0	0	0	0	0	0	0	0	0	0	0	0	0	5.9489e-05	0	0	0	0	0	0	1.81912e-05	0	0	0	0	0	0	0	0	0	0	0	0	0
Otu530780	0	0	0	0	0	0	0	0	0	0	0	0	0	1.38729e-05	0	0	0	0	0	0	0	0	0	0	0	0	0	0	5.9489e-05	0	0	0	0	0	0	1.81912e-05	0	0	0	0	0	0	0	0	0	0	0	0	0
Thermoanaerobacterales	0	4.84069e-06	4.76613e-06	4.17666e-05	4.31588e-05	1.99255e-05	5.9522e-06	3.23572e-05	1.86537e-05	9.4623e-06	1.4659e-05	3.03457e-05	1.84946e-05	9.2486e-06	1.76892e-05	1.78183e-05	9.22143e-06	5.0804e-06	0	0	1.01019e-05	0	0	0	0	9.34693e-06	0	0	9.91483e-06	0	2.48271e-05	1.91234e-05	9.48344e-06	0	5.08585e-06	2.2739e-05	1.51586e-05	1.48869e-05	5.06894e-06	1.43386e-05	1.9991e-05	5.49046e-05	1.45387e-05	9.01439e-05	4.48358e-06	5.53111e-05	9.59228e-06	2.33029e-05	9.49979e-06
Thermoanaerobacteraceae	0	4.84069e-06	4.76613e-06	4.17666e-05	4.31588e-05	1.99255e-05	5.9522e-06	3.23572e-05	1.86537e-05	9.4623e-06	1.4659e-05	3.03457e-05	1.84946e-05	9.2486e-06	1.76892e-05	1.78183e-05	9.22143e-06	5.0804e-06	0	0	1.01019e-05	0	0	0	0	9.34693e-06	0	0	9.91483e-06	0	2.48271e-05	1.91234e-05	9.48344e-06	0	5.08585e-06	2.2739e-05	1.51586e-05	1.48869e-05	5.06894e-06	1.43386e-05	1.9991e-05	5.49046e-05	1.45387e-05	9.01439e-05	4.48358e-06	5.53111e-05	9.59228e-06	2.33029e-05	9.49979e-06
Syntrophaceticus	0	4.84069e-06	4.76613e-06	4.17666e-05	4.31588e-05	1.99255e-05	5.9522e-06	3.23572e-05	1.86537e-05	9.4623e-06	1.4659e-05	3.03457e-05	1.84946e-05	9.2486e-06	1.76892e-05	1.78183e-05	9.22143e-06	5.0804e-06	0	0	1.01019e-05	0	0	0	0	9.34693e-06	0	0	9.91483e-06	0	2.48271e-05	1.91234e-05	9.48344e-06	0	5.08585e-06	2.2739e-05	1.51586e-05	1.48869e-05	5.06894e-06	1.43386e-05	1.9991e-05	5.49046e-05	1.45387e-05	9.01439e-05	4.48358e-06	5.53111e-05	9.59228e-06	2.33029e-05	9.49979e-06
Otu318500	0	4.84069e-06	4.76613e-06	4.17666e-05	4.31588e-05	1.99255e-05	5.9522e-06	3.23572e-05	1.86537e-05	9.4623e-06	1.4659e-05	3.03457e-05	1.84946e-05	9.2486e-06	1.76892e-05	1.78183e-05	9.22143e-06	5.0804e-06	0	0	1.01019e-05	0	0	0	0	9.34693e-06	0	0	9.91483e-06	0	2.48271e-05	1.91234e-05	9.48344e-06	0	5.08585e-06	2.2739e-05	1.51586e-05	1.48869e-05	5.06894e-06	1.43386e-05	1.9991e-05	5.49046e-05	1.45387e-05	9.01439e-05	4.48358e-06	5.53111e-05	9.59228e-06	2.33029e-05	9.49979e-06
unclassified	2.77908e-05	2.42035e-05	9.53225e-06	6.49703e-05	4.31588e-05	2.49068e-05	4.16654e-05	4.16021e-05	5.12976e-05	1.89246e-05	4.88632e-05	3.90159e-05	1.84946e-05	9.2486e-06	2.21115e-05	5.3455e-05	5.99393e-05	0	2.5998e-05	4.45012e-06	5.05094e-06	0	2.95817e-05	0	0	2.80408e-05	0	1.98127e-05	0.000143765	1.44432e-05	7.94467e-05	4.30276e-05	1.42252e-05	2.84142e-05	2.03434e-05	0.000131886	1.01057e-05	3.47362e-05	1.52068e-05	2.38976e-05	2.49888e-05	0.000123535	4.84623e-05	0.000113866	3.58686e-05	5.53111e-05	1.91846e-05	2.79634e-05	9.49979e-06
unclassified	2.77908e-05	2.42035e-05	9.53225e-06	6.49703e-05	4.31588e-05	2.49068e-05	4.16654e-05	4.16021e-05	5.12976e-05	1.89246e-05	4.88632e-05	3.90159e-05	1.84946e-05	9.2486e-06	2.21115e-05	5.3455e-05	5.99393e-05	0	2.5998e-05	4.45012e-06	5.05094e-06	0	2.95817e-05	0	0	2.80408e-05	0	1.98127e-05	0.000143765	1.44432e-05	7.94467e-05	4.30276e-05	1.42252e-05	2.84142e-05	2.03434e-05	0.000131886	1.01057e-05	3.47362e-05	1.52068e-05	2.38976e-05	2.49888e-05	0.000123535	4.84623e-05	0.000113866	3.58686e-05	5.53111e-05	1.91846e-05	2.79634e-05	9.49979e-06
unclassified	2.77908e-05	2.42035e-05	9.53225e-06	6.49703e-05	4.31588e-05	2.49068e-05	4.16654e-05	4.16021e-05	5.12976e-05	1.89246e-05	4.88632e-05	3.90159e-05	1.84946e-05	9.2486e-06	2.21115e-05	5.3455e-05	5.99393e-05	0	2.5998e-05	4.45012e-06	5.05094e-06	0	2.95817e-05	0	0	2.80408e-05	0	1.98127e-05	0.000143765	1.44432e-05	7.94467e-05	4.30276e-05	1.42252e-05	2.84142e-05	2.03434e-05	0.000131886	1.01057e-05	3.47362e-05	1.52068e-05	2.38976e-05	2.49888e-05	0.000123535	4.84623e-05	0.000113866	3.58686e-05	5.53111e-05	1.91846e-05	2.79634e-05	9.49979e-06
Otu324049	4.6318e-06	0	9.53225e-06	3.24852e-05	4.79543e-06	0	1.19044e-05	0	0	9.4623e-06	1.4659e-05	1.30053e-05	9.24731e-06	9.2486e-06	4.42229e-06	2.22729e-05	0	0	0	4.45012e-06	0	0	1.47909e-05	0	0	9.34693e-06	0	0	0	0	4.46887e-05	1.43425e-05	4.74172e-06	4.7357e-06	5.08585e-06	3.18345e-05	0	1.48869e-05	0	1.43386e-05	4.99775e-06	3.66031e-05	1.93849e-05	7.59107e-05	1.34507e-05	3.01697e-05	4.79614e-06	9.32114e-06	0
Otu343463	1.85272e-05	2.42035e-05	0	3.24852e-05	3.83634e-05	2.49068e-05	2.9761e-05	4.16021e-05	5.12976e-05	9.4623e-06	3.42042e-05	2.60106e-05	9.24731e-06	0	1.76892e-05	3.11821e-05	5.99393e-05	0	2.5998e-05	0	5.05094e-06	0	1.47909e-05	0	0	1.86939e-05	0	1.98127e-05	9.91483e-06	1.44432e-05	3.47579e-05	2.86851e-05	9.48344e-06	2.36785e-05	1.52575e-05	0.000100051	1.01057e-05	1.98492e-05	1.52068e-05	9.55904e-06	1.9991e-05	8.69323e-05	2.90774e-05	3.79553e-05	2.24179e-05	2.51414e-05	1.43884e-05	1.86423e-05	9.49979e-06
Otu530746	4.6318e-06	0	0	0	0	0	0	0	0	0	0	0	0	0	0	0	0	0	0	0	0	0	0	0	0	0	0	0	0.00013385	0	0	0	0	0	0	0	0	0	0	0	0	0	0	0	0	0	0	0	0
Erysipelotrichia	0	0	0	0	0	0	5.9522e-06	0	0	4.73115e-06	0	0	0	0	0	0	4.61072e-06	0	0	0	0	0	4.93029e-06	0	0	0	0	0	0.000480869	0	9.93083e-06	0	0	0	0	0	0	0	0	0	9.9955e-06	6.40553e-05	0	6.16774e-05	6.72537e-05	0	4.79614e-06	0	0
Erysipelotrichales	0	0	0	0	0	0	5.9522e-06	0	0	4.73115e-06	0	0	0	0	0	0	4.61072e-06	0	0	0	0	0	4.93029e-06	0	0	0	0	0	0.000480869	0	9.93083e-06	0	0	0	0	0	0	0	0	0	9.9955e-06	6.40553e-05	0	6.16774e-05	6.72537e-05	0	4.79614e-06	0	0
Erysipelotrichaceae	0	0	0	0	0	0	5.9522e-06	0	0	4.73115e-06	0	0	0	0	0	0	4.61072e-06	0	0	0	0	0	4.93029e-06	0	0	0	0	0	0.000480869	0	9.93083e-06	0	0	0	0	0	0	0	0	0	9.9955e-06	6.40553e-05	0	6.16774e-05	6.72537e-05	0	4.79614e-06	0	0
Allobaculum	0	0	0	0	0	0	0	0	0	0	0	0	0	0	0	0	0	0	0	0	0	0	0	0	0	0	0	0	0	0	0	0	0	0	0	0	0	0	0	0	0	6.40553e-05	0	0	6.72537e-05	0	0	0	0
Otu1066	0	0	0	0	0	0	0	0	0	0	0	0	0	0	0	0	0	0	0	0	0	0	0	0	0	0	0	0	0	0	0	0	0	0	0	0	0	0	0	0	0	5.49046e-05	0	0	4.48358e-05	0	0	0	0
Otu14125	0	0	0	0	0	0	0	0	0	0	0	0	0	0	0	0	0	0	0	0	0	0	0	0	0	0	0	0	0	0	0	0	0	0	0	0	0	0	0	0	0	9.15076e-06	0	0	2.24179e-05	0	0	0	0
Turicibacter	0	0	0	0	0	0	5.9522e-06	0	0	4.73115e-06	0	0	0	0	0	0	4.61072e-06	0	0	0	0	0	4.93029e-06	0	0	0	0	0	0.000480869	0	9.93083e-06	0	0	0	0	0	0	0	0	0	9.9955e-06	0	0	6.16774e-05	0	0	4.79614e-06	0	0
Otu1050	0	0	0	0	0	0	0	0	0	0	0	0	0	0	0	0	0	0	0	0	0	0	0	0	0	0	0	0	0	0	0	0	0	0	0	0	0	0	0	0	0	0	0	6.16774e-05	0	0	0	0	0
Otu25581	0	0	0	0	0	0	5.9522e-06	0	0	4.73115e-06	0	0	0	0	0	0	4.61072e-06	0	0	0	0	0	4.93029e-06	0	0	0	0	0	0.000480869	0	9.93083e-06	0	0	0	0	0	0	0	0	0	9.9955e-06	0	0	0	0	0	4.79614e-06	0	0
Negativicutes	4.6318e-06	4.84069e-06	4.76613e-06	6.49703e-05	1.91817e-05	0	5.9522e-06	0.000175654	3.73073e-05	3.78492e-05	1.4659e-05	0	2.77419e-05	1.84972e-05	1.32669e-05	2.22729e-05	1.38322e-05	5.0804e-06	4.333e-06	0	5.05094e-06	1.37364e-05	4.93029e-06	0	4.73303e-06	9.34693e-06	4.47852e-06	0	0.000446167	1.44432e-05	3.47579e-05	4.78085e-06	1.42252e-05	4.7357e-06	0	1.36434e-05	5.05285e-06	0	3.54826e-05	9.55904e-06	9.9955e-06	9.15076e-06	1.45387e-05	0	4.48358e-06	1.00566e-05	0	9.32114e-06	0
Selenomonadales	4.6318e-06	4.84069e-06	4.76613e-06	6.49703e-05	1.91817e-05	0	5.9522e-06	0.000175654	3.73073e-05	3.78492e-05	1.4659e-05	0	2.77419e-05	1.84972e-05	1.32669e-05	2.22729e-05	1.38322e-05	5.0804e-06	4.333e-06	0	5.05094e-06	1.37364e-05	4.93029e-06	0	4.73303e-06	9.34693e-06	4.47852e-06	0	0.000446167	1.44432e-05	3.47579e-05	4.78085e-06	1.42252e-05	4.7357e-06	0	1.36434e-05	5.05285e-06	0	3.54826e-05	9.55904e-06	9.9955e-06	9.15076e-06	1.45387e-05	0	4.48358e-06	1.00566e-05	0	9.32114e-06	0
Acidaminococcaceae	0	0	0	0	0	0	0	0	0	2.83869e-05	0	0	0	0	0	0	0	0	0	0	0	0	0	0	0	0	0	0	0.000193339	0	0	0	0	0	0	0	0	0	0	0	0	0	0	0	0	0	0	0	0
Phascolarctobacterium	0	0	0	0	0	0	0	0	0	2.83869e-05	0	0	0	0	0	0	0	0	0	0	0	0	0	0	0	0	0	0	0.000193339	0	0	0	0	0	0	0	0	0	0	0	0	0	0	0	0	0	0	0	0
Otu999	0	0	0	0	0	0	0	0	0	2.83869e-05	0	0	0	0	0	0	0	0	0	0	0	0	0	0	0	0	0	0	0.000193339	0	0	0	0	0	0	0	0	0	0	0	0	0	0	0	0	0	0	0	0
Veillonellaceae	4.6318e-06	4.84069e-06	4.76613e-06	6.49703e-05	1.91817e-05	0	5.9522e-06	0.000175654	3.73073e-05	9.4623e-06	1.4659e-05	0	2.77419e-05	1.84972e-05	1.32669e-05	2.22729e-05	1.38322e-05	5.0804e-06	4.333e-06	0	5.05094e-06	1.37364e-05	4.93029e-06	0	4.73303e-06	9.34693e-06	4.47852e-06	0	0.000252828	1.44432e-05	3.47579e-05	4.78085e-06	1.42252e-05	4.7357e-06	0	1.36434e-05	5.05285e-06	0	3.54826e-05	9.55904e-06	9.9955e-06	9.15076e-06	1.45387e-05	0	4.48358e-06	1.00566e-05	0	9.32114e-06	0
Megamonas	4.6318e-06	4.84069e-06	4.76613e-06	6.49703e-05	1.91817e-05	0	5.9522e-06	0.000175654	3.73073e-05	9.4623e-06	1.4659e-05	0	2.77419e-05	1.84972e-05	1.32669e-05	2.22729e-05	1.38322e-05	5.0804e-06	4.333e-06	0	5.05094e-06	1.37364e-05	4.93029e-06	0	4.73303e-06	9.34693e-06	4.47852e-06	0	2.47871e-05	1.44432e-05	3.47579e-05	4.78085e-06	1.42252e-05	4.7357e-06	0	1.36434e-05	5.05285e-06	0	3.54826e-05	9.55904e-06	9.9955e-06	0	1.45387e-05	0	4.48358e-06	1.00566e-05	0	9.32114e-06	0
Otu128307	4.6318e-06	4.84069e-06	4.76613e-06	6.49703e-05	1.91817e-05	0	5.9522e-06	0.000175654	3.73073e-05	9.4623e-06	1.4659e-05	0	2.77419e-05	1.84972e-05	1.32669e-05	2.22729e-05	1.38322e-05	5.0804e-06	4.333e-06	0	5.05094e-06	1.37364e-05	4.93029e-06	0	4.73303e-06	9.34693e-06	4.47852e-06	0	2.47871e-05	1.44432e-05	3.47579e-05	4.78085e-06	1.42252e-05	4.7357e-06	0	1.36434e-05	5.05285e-06	0	3.54826e-05	9.55904e-06	9.9955e-06	0	1.45387e-05	0	4.48358e-06	1.00566e-05	0	9.32114e-06	0
unclassified	0	0	0	0	0	0	0	0	0	0	0	0	0	0	0	0	0	0	0	0	0	0	0	0	0	0	0	0	0.000228041	0	0	0	0	0	0	0	0	0	0	0	0	9.15076e-06	0	0	0	0	0	0	0
Otu337599	0	0	0	0	0	0	0	0	0	0	0	0	0	0	0	0	0	0	0	0	0	0	0	0	0	0	0	0	0.000228041	0	0	0	0	0	0	0	0	0	0	0	0	9.15076e-06	0	0	0	0	0	0	0
unclassified	0	0	4.76613e-06	1.85629e-05	0	9.96274e-06	5.9522e-06	0	0	0	0	0	4.62366e-06	0	0	4.45458e-06	0	0	4.333e-06	0	0	0	0	0	0	0	0	0	0.00118978	4.8144e-06	4.96542e-06	0	0	0	5.08585e-06	0	0	4.96231e-06	0	0	0	0	0	4.74442e-06	0	5.02828e-06	0	4.66057e-06	0
unclassified	0	0	4.76613e-06	1.85629e-05	0	9.96274e-06	5.9522e-06	0	0	0	0	0	4.62366e-06	0	0	4.45458e-06	0	0	4.333e-06	0	0	0	0	0	0	0	0	0	0.00118978	4.8144e-06	4.96542e-06	0	0	0	5.08585e-06	0	0	4.96231e-06	0	0	0	0	0	4.74442e-06	0	5.02828e-06	0	4.66057e-06	0
unclassified	0	0	4.76613e-06	1.85629e-05	0	9.96274e-06	5.9522e-06	0	0	0	0	0	4.62366e-06	0	0	4.45458e-06	0	0	4.333e-06	0	0	0	0	0	0	0	0	0	0.00118978	4.8144e-06	4.96542e-06	0	0	0	5.08585e-06	0	0	4.96231e-06	0	0	0	0	0	4.74442e-06	0	5.02828e-06	0	4.66057e-06	0
unclassified	0	0	4.76613e-06	1.85629e-05	0	9.96274e-06	5.9522e-06	0	0	0	0	0	4.62366e-06	0	0	4.45458e-06	0	0	4.333e-06	0	0	0	0	0	0	0	0	0	0.00118978	4.8144e-06	4.96542e-06	0	0	0	5.08585e-06	0	0	4.96231e-06	0	0	0	0	0	4.74442e-06	0	5.02828e-06	0	4.66057e-06	0
Otu1133	0	0	0	0	0	0	0	0	0	0	0	0	0	0	0	0	0	0	0	0	0	0	0	0	0	0	0	0	4.95742e-06	0	0	0	0	0	0	0	0	0	0	0	0	0	0	0	0	0	0	0	0
Otu530217	0	0	4.76613e-06	1.85629e-05	0	0	0	0	0	0	0	0	0	0	0	0	0	0	0	0	0	0	0	0	0	0	0	0	8.42761e-05	0	0	0	0	0	0	0	0	0	0	0	0	0	0	0	0	0	0	0	0
Otu530802	0	0	0	0	0	0	0	0	0	0	0	0	0	0	0	0	0	0	0	0	0	0	0	0	0	0	0	0	7.43612e-05	4.8144e-06	0	0	0	0	0	0	0	0	0	0	0	0	0	0	0	0	0	0	0
Otu58561	0	0	0	0	0	0	0	0	0	0	0	0	0	0	0	4.45458e-06	0	0	4.333e-06	0	0	0	0	0	0	0	0	0	5.9489e-05	0	0	0	0	0	0	0	0	0	0	0	0	0	0	4.74442e-06	0	0	0	0	0
Otu95461	0	0	0	0	0	9.96274e-06	5.9522e-06	0	0	0	0	0	4.62366e-06	0	0	0	0	0	0	0	0	0	0	0	0	0	0	0	0.000966696	0	4.96542e-06	0	0	0	5.08585e-06	0	0	4.96231e-06	0	0	0	0	0	0	0	5.02828e-06	0	4.66057e-06	0
Fusobacteria	1.38954e-05	0	0	0	4.79543e-06	9.96274e-06	5.9522e-06	0	0	4.73115e-06	0	0	1.84946e-05	0	0	0	0	0	0	0	0	1.37364e-05	0	0	9.46607e-06	0	0	9.90634e-06	9.41909e-05	0	0	1.43425e-05	4.74172e-06	0	0.000162747	2.2739e-05	0	0.000248116	3.54826e-05	0	0.000529762	0.000150988	0	0.00690787	0	0	9.59228e-06	0	0
Fusobacteriia	1.38954e-05	0	0	0	4.79543e-06	9.96274e-06	5.9522e-06	0	0	4.73115e-06	0	0	1.84946e-05	0	0	0	0	0	0	0	0	1.37364e-05	0	0	9.46607e-06	0	0	9.90634e-06	9.41909e-05	0	0	1.43425e-05	4.74172e-06	0	0.000162747	2.2739e-05	0	0.000248116	3.54826e-05	0	0.000529762	0.000150988	0	0.00690787	0	0	9.59228e-06	0	0
Fusobacteriales	1.38954e-05	0	0	0	4.79543e-06	9.96274e-06	5.9522e-06	0	0	4.73115e-06	0	0	1.84946e-05	0	0	0	0	0	0	0	0	1.37364e-05	0	0	9.46607e-06	0	0	9.90634e-06	9.41909e-05	0	0	1.43425e-05	4.74172e-06	0	0.000162747	2.2739e-05	0	0.000248116	3.54826e-05	0	0.000529762	0.000150988	0	0.00690787	0	0	9.59228e-06	0	0
Fusobacteriaceae	1.38954e-05	0	0	0	4.79543e-06	9.96274e-06	5.9522e-06	0	0	4.73115e-06	0	0	1.84946e-05	0	0	0	0	0	0	0	0	1.37364e-05	0	0	9.46607e-06	0	0	9.90634e-06	9.41909e-05	0	0	1.43425e-05	4.74172e-06	0	0.000162747	2.2739e-05	0	0.000248116	3.54826e-05	0	0.000529762	0.000150988	0	0.00690787	0	0	9.59228e-06	0	0
Cetobacterium	1.38954e-05	0	0	0	4.79543e-06	9.96274e-06	5.9522e-06	0	0	4.73115e-06	0	0	1.84946e-05	0	0	0	0	0	0	0	0	1.37364e-05	0	0	9.46607e-06	0	0	9.90634e-06	9.41909e-05	0	0	1.43425e-05	4.74172e-06	0	0.000162747	2.2739e-05	0	0.000248116	3.54826e-05	0	0.000529762	0.000150988	0	0.00690787	0	0	9.59228e-06	0	0
Otu318474	1.38954e-05	0	0	0	4.79543e-06	9.96274e-06	5.9522e-06	0	0	4.73115e-06	0	0	1.84946e-05	0	0	0	0	0	0	0	0	1.37364e-05	0	0	9.46607e-06	0	0	9.90634e-06	9.41909e-05	0	0	1.43425e-05	4.74172e-06	0	0.000162747	2.2739e-05	0	0.000248116	3.54826e-05	0	0.000529762	0.000150988	0	0.00690787	0	0	9.59228e-06	0	0
Gemmatimonadetes	4.6318e-06	0	0	0	0	4.98137e-06	0	0	0	0	0	0	4.62366e-06	0	0	0	9.22143e-06	0	0	4.45012e-06	0	0	0	5.11015e-06	0	0	4.47852e-06	0	0.000381721	0	0	0	0	0	0	0	0	0	0	4.77952e-06	0	0	4.84623e-06	2.37221e-05	0	2.51414e-05	0	0	0
Gemmatimonadetes	4.6318e-06	0	0	0	0	4.98137e-06	0	0	0	0	0	0	4.62366e-06	0	0	0	9.22143e-06	0	0	4.45012e-06	0	0	0	5.11015e-06	0	0	4.47852e-06	0	0.000381721	0	0	0	0	0	0	0	0	0	0	4.77952e-06	0	0	4.84623e-06	2.37221e-05	0	2.51414e-05	0	0	0
Gemmatimonadales	4.6318e-06	0	0	0	0	4.98137e-06	0	0	0	0	0	0	4.62366e-06	0	0	0	9.22143e-06	0	0	4.45012e-06	0	0	0	5.11015e-06	0	0	4.47852e-06	0	0.000381721	0	0	0	0	0	0	0	0	0	0	4.77952e-06	0	0	4.84623e-06	2.37221e-05	0	2.51414e-05	0	0	0
Gemmatimonadaceae	4.6318e-06	0	0	0	0	4.98137e-06	0	0	0	0	0	0	4.62366e-06	0	0	0	9.22143e-06	0	0	4.45012e-06	0	0	0	5.11015e-06	0	0	4.47852e-06	0	0.000381721	0	0	0	0	0	0	0	0	0	0	4.77952e-06	0	0	4.84623e-06	2.37221e-05	0	2.51414e-05	0	0	0
Gemmatimonas	4.6318e-06	0	0	0	0	4.98137e-06	0	0	0	0	0	0	4.62366e-06	0	0	0	9.22143e-06	0	0	4.45012e-06	0	0	0	5.11015e-06	0	0	4.47852e-06	0	0.000381721	0	0	0	0	0	0	0	0	0	0	4.77952e-06	0	0	4.84623e-06	2.37221e-05	0	2.51414e-05	0	0	0
Otu178351	0	0	0	0	0	0	0	0	0	0	0	0	0	0	0	0	4.61072e-06	0	0	0	0	0	0	0	0	0	0	0	8.42761e-05	0	0	0	0	0	0	0	0	0	0	0	0	0	0	9.48884e-06	0	0	0	0	0
Otu178352	0	0	0	0	0	0	0	0	0	0	0	0	0	0	0	0	0	0	0	0	0	0	0	0	0	0	0	0	0.000123935	0	0	0	0	0	0	0	0	0	0	0	0	0	0	0	0	0	0	0	0
Otu178353	0	0	0	0	0	0	0	0	0	0	0	0	0	0	0	0	0	0	0	0	0	0	0	0	0	0	0	0	0	0	0	0	0	0	0	0	0	0	0	4.77952e-06	0	0	0	0	0	0	0	0	0
Otu178357	0	0	0	0	0	0	0	0	0	0	0	0	0	0	0	0	0	0	0	4.45012e-06	0	0	0	0	0	0	0	0	0	0	0	0	0	0	0	0	0	0	0	0	0	0	0	0	0	0	0	0	0
Otu191284	0	0	0	0	0	0	0	0	0	0	0	0	4.62366e-06	0	0	0	0	0	0	0	0	0	0	5.11015e-06	0	0	0	0	3.47019e-05	0	0	0	0	0	0	0	0	0	0	0	0	0	0	4.74442e-06	0	1.50849e-05	0	0	0
Otu191288	0	0	0	0	0	0	0	0	0	0	0	0	0	0	0	0	0	0	0	0	0	0	0	0	0	0	0	0	4.95742e-06	0	0	0	0	0	0	0	0	0	0	0	0	0	0	0	0	0	0	0	0
Otu191289	4.6318e-06	0	0	0	0	0	0	0	0	0	0	0	0	0	0	0	0	0	0	0	0	0	0	0	0	0	0	0	0	0	0	0	0	0	0	0	0	0	0	0	0	0	0	0	0	0	0	0	0
Otu222115	0	0	0	0	0	4.98137e-06	0	0	0	0	0	0	0	0	0	0	4.61072e-06	0	0	0	0	0	0	0	0	0	4.47852e-06	0	0.000109063	0	0	0	0	0	0	0	0	0	0	0	0	0	4.84623e-06	9.48884e-06	0	1.00566e-05	0	0	0
Otu39	0	0	0	0	0	0	0	0	0	0	0	0	0	0	0	0	0	0	0	0	0	0	0	0	0	0	0	0	0	0	0	0	0	0	0	0	0	0	0	0	0	0	0	0	0	0	0	0	0
Otu68	0	0	0	0	0	0	0	0	0	0	0	0	0	0	0	0	0	0	0	0	0	0	0	0	0	0	0	0	9.91483e-06	0	0	0	0	0	0	0	0	0	0	0	0	0	0	0	0	0	0	0	0
Otu69	0	0	0	0	0	0	0	0	0	0	0	0	0	0	0	0	0	0	0	0	0	0	0	0	0	0	0	0	1.48722e-05	0	0	0	0	0	0	0	0	0	0	0	0	0	0	0	0	0	0	0	0
Hydrogenedentes	0	0	0	0	0	0	0	0	0	0	0	0	0	0	0	0	0	0	0	0	0	0	0	0	0	0	0	0	0	0	0	0	0	0	0	0	0	0	5.06894e-06	0	0	0	0	0	0	0	0	0	0
NA	0	0	0	0	0	0	0	0	0	0	0	0	0	0	0	0	0	0	0	0	0	0	0	0	0	0	0	0	0	0	0	0	0	0	0	0	0	0	5.06894e-06	0	0	0	0	0	0	0	0	0	0
NA	0	0	0	0	0	0	0	0	0	0	0	0	0	0	0	0	0	0	0	0	0	0	0	0	0	0	0	0	0	0	0	0	0	0	0	0	0	0	5.06894e-06	0	0	0	0	0	0	0	0	0	0
NA	0	0	0	0	0	0	0	0	0	0	0	0	0	0	0	0	0	0	0	0	0	0	0	0	0	0	0	0	0	0	0	0	0	0	0	0	0	0	5.06894e-06	0	0	0	0	0	0	0	0	0	0
Nitrospirae	0	0	0	0	9.59085e-06	4.98137e-06	0	0	0	0	0	0	0	0	0	0	0	0	0	0	0	0	0	0	0	0	0	0	9.41909e-05	0	4.96542e-06	0	0	0	0	4.54779e-06	0	0	5.57583e-05	0	0	0	0	4.74442e-06	0	0	4.79614e-06	0	0
Nitrospira	0	0	0	0	9.59085e-06	4.98137e-06	0	0	0	0	0	0	0	0	0	0	0	0	0	0	0	0	0	0	0	0	0	0	9.41909e-05	0	4.96542e-06	0	0	0	0	4.54779e-06	0	0	5.57583e-05	0	0	0	0	4.74442e-06	0	0	4.79614e-06	0	0
Nitrospirales	0	0	0	0	9.59085e-06	4.98137e-06	0	0	0	0	0	0	0	0	0	0	0	0	0	0	0	0	0	0	0	0	0	0	9.41909e-05	0	4.96542e-06	0	0	0	0	4.54779e-06	0	0	5.57583e-05	0	0	0	0	4.74442e-06	0	0	4.79614e-06	0	0
Nitrospiraceae	0	0	0	0	9.59085e-06	4.98137e-06	0	0	0	0	0	0	0	0	0	0	0	0	0	0	0	0	0	0	0	0	0	0	9.41909e-05	0	4.96542e-06	0	0	0	0	4.54779e-06	0	0	5.57583e-05	0	0	0	0	4.74442e-06	0	0	4.79614e-06	0	0
Nitrospira	0	0	0	0	9.59085e-06	4.98137e-06	0	0	0	0	0	0	0	0	0	0	0	0	0	0	0	0	0	0	0	0	0	0	9.41909e-05	0	4.96542e-06	0	0	0	0	4.54779e-06	0	0	5.57583e-05	0	0	0	0	4.74442e-06	0	0	4.79614e-06	0	0
Otu178350	0	0	0	0	0	4.98137e-06	0	0	0	0	0	0	0	0	0	0	0	0	0	0	0	0	0	0	0	0	0	0	8.42761e-05	0	4.96542e-06	0	0	0	0	0	0	0	0	0	0	0	0	4.74442e-06	0	0	0	0	0
Otu214	0	0	0	0	9.59085e-06	0	0	0	0	0	0	0	0	0	0	0	0	0	0	0	0	0	0	0	0	0	0	0	9.91483e-06	0	0	0	0	0	0	4.54779e-06	0	0	5.57583e-05	0	0	0	0	0	0	0	4.79614e-06	0	0
Planctomycetes	0	0	0	0	4.79543e-06	0	0	5.54695e-05	0	0	0	4.3351e-06	0	0	0	0	0	0	0	0	0	0	0	5.11015e-06	0	0	0	4.95317e-06	1.98297e-05	0	4.96542e-06	0	0	0	0	0	0	0	0	0	0	0	0	0	0	0	0	0	0
Planctomycetia	0	0	0	0	4.79543e-06	0	0	5.54695e-05	0	0	0	4.3351e-06	0	0	0	0	0	0	0	0	0	0	0	5.11015e-06	0	0	0	4.95317e-06	1.98297e-05	0	4.96542e-06	0	0	0	0	0	0	0	0	0	0	0	0	0	0	0	0	0	0
Candidatus Brocadiales	0	0	0	0	0	0	0	0	0	0	0	4.3351e-06	0	0	0	0	0	0	0	0	0	0	0	0	0	0	0	4.95317e-06	0	0	0	0	0	0	0	0	0	0	0	0	0	0	0	0	0	0	0	0	0
Candidatus Brocadiaceae	0	0	0	0	0	0	0	0	0	0	0	4.3351e-06	0	0	0	0	0	0	0	0	0	0	0	0	0	0	0	4.95317e-06	0	0	0	0	0	0	0	0	0	0	0	0	0	0	0	0	0	0	0	0	0
Candidatus Kuenenia	0	0	0	0	0	0	0	0	0	0	0	4.3351e-06	0	0	0	0	0	0	0	0	0	0	0	0	0	0	0	4.95317e-06	0	0	0	0	0	0	0	0	0	0	0	0	0	0	0	0	0	0	0	0	0
Otu55944	0	0	0	0	0	0	0	0	0	0	0	4.3351e-06	0	0	0	0	0	0	0	0	0	0	0	0	0	0	0	4.95317e-06	0	0	0	0	0	0	0	0	0	0	0	0	0	0	0	0	0	0	0	0	0
Planctomycetales	0	0	0	0	4.79543e-06	0	0	5.54695e-05	0	0	0	0	0	0	0	0	0	0	0	0	0	0	0	5.11015e-06	0	0	0	0	1.98297e-05	0	4.96542e-06	0	0	0	0	0	0	0	0	0	0	0	0	0	0	0	0	0	0
Planctomycetaceae	0	0	0	0	4.79543e-06	0	0	5.54695e-05	0	0	0	0	0	0	0	0	0	0	0	0	0	0	0	5.11015e-06	0	0	0	0	1.98297e-05	0	4.96542e-06	0	0	0	0	0	0	0	0	0	0	0	0	0	0	0	0	0	0
Pirellula	0	0	0	0	4.79543e-06	0	0	0	0	0	0	0	0	0	0	0	0	0	0	0	0	0	0	0	0	0	0	0	1.98297e-05	0	0	0	0	0	0	0	0	0	0	0	0	0	0	0	0	0	0	0	0
Otu64350	0	0	0	0	4.79543e-06	0	0	0	0	0	0	0	0	0	0	0	0	0	0	0	0	0	0	0	0	0	0	0	1.98297e-05	0	0	0	0	0	0	0	0	0	0	0	0	0	0	0	0	0	0	0	0
Otu64356	0	0	0	0	0	0	0	0	0	0	0	0	0	0	0	0	0	0	0	0	0	0	0	0	0	0	0	0	0	0	0	0	0	0	0	0	0	0	0	0	0	0	0	0	0	0	0	0	0
Thermogutta	0	0	0	0	0	0	0	5.54695e-05	0	0	0	0	0	0	0	0	0	0	0	0	0	0	0	5.11015e-06	0	0	0	0	0	0	4.96542e-06	0	0	0	0	0	0	0	0	0	0	0	0	0	0	0	0	0	0
Otu64347	0	0	0	0	0	0	0	0	0	0	0	0	0	0	0	0	0	0	0	0	0	0	0	0	0	0	0	0	0	0	0	0	0	0	0	0	0	0	0	0	0	0	0	0	0	0	0	0	0
Otu95468	0	0	0	0	0	0	0	5.54695e-05	0	0	0	0	0	0	0	0	0	0	0	0	0	0	0	5.11015e-06	0	0	0	0	0	0	4.96542e-06	0	0	0	0	0	0	0	0	0	0	0	0	0	0	0	0	0	0
unclassified	0	0	0	0	0	0	0	0	0	0	0	0	0	0	0	0	0	0	0	0	0	0	0	0	0	0	0	0	0	0	0	0	0	0	0	0	0	0	0	0	0	0	0	0	0	0	0	0	0
Otu95477	0	0	0	0	0	0	0	0	0	0	0	0	0	0	0	0	0	0	0	0	0	0	0	0	0	0	0	0	0	0	0	0	0	0	0	0	0	0	0	0	0	0	0	0	0	0	0	0	0
Proteobacteria	0.627057	0.770048	0.836002	0.488057	0.744615	0.724052	0.575763	0.601687	0.731835	0.79323	0.511368	0.413686	0.334818	0.391706	0.464703	0.20124	0.615789	0.810836	0.323432	0.5003	0.715294	0.758276	0.54387	0.769435	0.643361	0.460182	0.693692	0.401994	0.405046	0.58704	0.4164	0.198984	0.662001	0.736605	0.727632	0.542965	0.880591	0.729177	0.654527	0.70301	0.589455	0.398644	0.416025	0.0688605	0.504484	0.359995	0.568227	0.518227	0.545378
Alphaproteobacteria	0.00755446	0.000338848	0.000252605	0.00672443	0.000983063	0.000278957	0.00045832	0.00217256	0.00110523	0.000260213	0.000644994	0.000333803	0.000522473	0.000254336	0.000141513	0.00079737	0.000355025	5.58844e-05	0.000155988	9.79027e-05	0.000121223	0.000164837	0.000103536	2.04406e-05	0.000118326	0.000345836	8.95704e-05	0.000272424	0.00351481	0.000158875	0.000575988	0.000368125	8.06092e-05	0.000388327	0.00459761	0.000900463	0.000237484	0.000302701	0.000278792	0.000473173	0.000509771	0.0015419	0.000348928	0.00226309	0.000224179	0.000593338	0.000172661	0.000708407	0.000104498
Caulobacterales	0.000731824	2.42035e-05	8.10241e-05	0.00019027	0.000110295	6.97392e-05	4.16654e-05	0.000272725	0.000335766	1.41935e-05	6.84085e-05	4.3351e-05	0.000115591	6.93645e-05	3.53783e-05	8.01825e-05	6.91608e-05	1.01608e-05	2.5998e-05	1.33504e-05	0	9.15759e-06	9.86057e-06	0	4.73303e-06	3.73877e-05	1.34356e-05	2.9719e-05	0.000148722	3.37008e-05	8.93775e-05	5.73702e-05	4.74172e-06	6.15641e-05	3.05151e-05	0.000168268	7.07399e-05	2.48116e-05	3.54826e-05	7.64723e-05	1.9991e-05	0.000155563	6.78472e-05	0.000137588	3.13851e-05	0.000135764	3.83691e-05	0.000102533	1.42497e-05
Caulobacteraceae	0.000731824	2.42035e-05	8.10241e-05	0.00019027	0.000110295	6.97392e-05	4.16654e-05	0.000272725	0.000335766	1.41935e-05	6.84085e-05	4.3351e-05	0.000115591	6.93645e-05	3.53783e-05	8.01825e-05	6.91608e-05	1.01608e-05	2.5998e-05	1.33504e-05	0	9.15759e-06	9.86057e-06	0	4.73303e-06	3.73877e-05	1.34356e-05	2.9719e-05	0.000148722	3.37008e-05	8.93775e-05	5.73702e-05	4.74172e-06	6.15641e-05	3.05151e-05	0.000168268	7.07399e-05	2.48116e-05	3.54826e-05	7.64723e-05	1.9991e-05	0.000155563	6.78472e-05	0.000137588	3.13851e-05	0.000135764	3.83691e-05	0.000102533	1.42497e-05
Brevundimonas	0	0	6.19596e-05	0	0	0	0	4.62246e-06	0	0	0	0	0	0	0	0	0	0	0	0	0	0	0	0	0	4.67347e-06	0	0	2.97445e-05	0	0	0	0	1.42071e-05	5.08585e-06	0	0	0	0	0	0	0	0	1.42333e-05	0	0	0	0	0
Otu343681	0	0	6.19596e-05	0	0	0	0	4.62246e-06	0	0	0	0	0	0	0	0	0	0	0	0	0	0	0	0	0	4.67347e-06	0	0	2.97445e-05	0	0	0	0	1.42071e-05	5.08585e-06	0	0	0	0	0	0	0	0	1.42333e-05	0	0	0	0	0
Phenylobacterium	0.000731824	2.42035e-05	1.90645e-05	0.00019027	0.000110295	6.97392e-05	4.16654e-05	0.000268103	0.000335766	1.41935e-05	6.84085e-05	4.3351e-05	0.000115591	6.93645e-05	3.53783e-05	8.01825e-05	6.91608e-05	1.01608e-05	2.5998e-05	1.33504e-05	0	9.15759e-06	9.86057e-06	0	4.73303e-06	3.27143e-05	1.34356e-05	2.9719e-05	0.000118978	3.37008e-05	8.93775e-05	5.73702e-05	4.74172e-06	4.7357e-05	2.54292e-05	0.000168268	7.07399e-05	2.48116e-05	3.54826e-05	7.64723e-05	1.9991e-05	0.000155563	6.78472e-05	0.000123355	3.13851e-05	0.000135764	3.83691e-05	0.000102533	1.42497e-05
Otu337604	0.000731824	2.42035e-05	1.90645e-05	0.00019027	0.000105499	6.97392e-05	4.16654e-05	0.000268103	0.000335766	1.41935e-05	6.84085e-05	4.3351e-05	0.000115591	6.93645e-05	3.53783e-05	8.01825e-05	6.91608e-05	1.01608e-05	2.5998e-05	1.33504e-05	0	9.15759e-06	9.86057e-06	0	4.73303e-06	2.80408e-05	1.34356e-05	2.9719e-05	1.98297e-05	3.37008e-05	8.93775e-05	5.73702e-05	4.74172e-06	4.7357e-05	2.54292e-05	0.000168268	7.07399e-05	1.98492e-05	3.54826e-05	7.64723e-05	1.49933e-05	0.000155563	6.78472e-05	0.000123355	3.13851e-05	0.000135764	3.83691e-05	0.000102533	1.42497e-05
Otu343504	0	0	0	0	4.79543e-06	0	0	0	0	0	0	0	0	0	0	0	0	0	0	0	0	0	0	0	0	4.67347e-06	0	0	4.46167e-05	0	0	0	0	0	0	0	0	4.96231e-06	0	0	4.99775e-06	0	0	0	0	0	0	0	0
Otu343583	0	0	0	0	0	0	0	0	0	0	0	0	0	0	0	0	0	0	0	0	0	0	0	0	0	0	0	0	5.45316e-05	0	0	0	0	0	0	0	0	0	0	0	0	0	0	0	0	0	0	0	0
Rhizobiales	0.00671147	0.000111336	0.000109621	0.00631604	0.000532292	0.000129516	0.000208327	0.00105392	0.000498986	0.000108817	0.00027852	0.000156064	0.000314409	0.000110983	5.74898e-05	0.000628096	0.000207482	3.55628e-05	0.000112658	4.89513e-05	0.000111121	6.86819e-05	7.88846e-05	5.11015e-06	8.99276e-05	0.000233673	4.92637e-05	0.00018822	0.000961739	6.74017e-05	0.000312821	0.000196015	6.63841e-05	0.000184692	0.00443995	0.000491161	0.000136427	0.000119095	0.000152068	0.00019596	0.000239892	0.000796116	0.000174464	0.000725896	0.00011209	0.000341923	8.15344e-05	0.000400809	8.07482e-05
Beijerinckiaceae	0	0	0	0	0	0	0	0	0	0	0	0	0	0	0	0	0	0	0	0	0	0	0	0	0	0	0	0	0.00017351	0	0	0	0	0	0	0	0	0	0	0	0	0	0	0	0	0	0	0	0
unclassified	0	0	0	0	0	0	0	0	0	0	0	0	0	0	0	0	0	0	0	0	0	0	0	0	0	0	0	0	0.00017351	0	0	0	0	0	0	0	0	0	0	0	0	0	0	0	0	0	0	0	0
Otu343472	0	0	0	0	0	0	0	0	0	0	0	0	0	0	0	0	0	0	0	0	0	0	0	0	0	0	0	0	0.00017351	0	0	0	0	0	0	0	0	0	0	0	0	0	0	0	0	0	0	0	0
Bradyrhizobiaceae	0.00261696	9.68139e-06	1.90645e-05	5.10481e-05	0.000359657	1.49441e-05	4.16654e-05	0.000120184	8.86049e-05	3.78492e-05	8.30674e-05	2.60106e-05	6.01075e-05	3.69944e-05	4.42229e-06	8.01825e-05	4.61072e-05	5.0804e-06	2.5998e-05	8.90024e-06	1.51528e-05	2.74728e-05	1.47909e-05	5.11015e-06	1.89321e-05	3.73877e-05	8.95704e-06	4.95317e-06	0.000143765	1.92576e-05	5.46196e-05	4.78085e-05	4.74172e-06	2.36785e-05	3.56009e-05	0.00012279	2.52643e-05	3.96985e-05	4.05515e-05	2.38976e-05	5.49753e-05	0.000128111	2.42311e-05	0.000208754	2.69015e-05	4.52546e-05	1.91846e-05	4.19451e-05	9.49979e-06
Bosea	0.000375175	4.84069e-06	9.53225e-06	1.85629e-05	0.000124681	9.96274e-06	2.9761e-05	2.31123e-05	7.46147e-05	3.31181e-05	5.86358e-05	1.30053e-05	1.84946e-05	2.31215e-05	0	2.22729e-05	1.84429e-05	0	4.333e-06	8.90024e-06	5.05094e-06	1.83152e-05	4.93029e-06	0	1.89321e-05	1.40204e-05	8.95704e-06	4.95317e-06	3.47019e-05	1.44432e-05	1.48962e-05	3.34659e-05	0	1.89428e-05	1.01717e-05	7.27646e-05	1.51586e-05	1.48869e-05	5.06894e-06	9.55904e-06	1.9991e-05	4.11784e-05	4.84623e-06	0.000128099	2.24179e-05	1.00566e-05	4.79614e-06	2.79634e-05	0
Otu343460	0.000375175	4.84069e-06	9.53225e-06	1.85629e-05	0.000124681	9.96274e-06	2.9761e-05	2.31123e-05	7.46147e-05	3.31181e-05	5.86358e-05	1.30053e-05	1.84946e-05	2.31215e-05	0	2.22729e-05	1.84429e-05	0	4.333e-06	8.90024e-06	5.05094e-06	1.83152e-05	4.93029e-06	0	1.89321e-05	1.40204e-05	8.95704e-06	4.95317e-06	3.47019e-05	1.44432e-05	1.48962e-05	3.34659e-05	0	1.89428e-05	1.01717e-05	7.27646e-05	1.51586e-05	1.48869e-05	5.06894e-06	9.55904e-06	1.9991e-05	4.11784e-05	4.84623e-06	0.000128099	2.24179e-05	1.00566e-05	4.79614e-06	2.79634e-05	0
Bradyrhizobium	0.00224179	4.84069e-06	9.53225e-06	3.24852e-05	0.000187022	4.98137e-06	1.19044e-05	9.70717e-05	1.39903e-05	4.73115e-06	2.44316e-05	1.30053e-05	4.16129e-05	1.38729e-05	4.42229e-06	5.79096e-05	2.76643e-05	5.0804e-06	2.1665e-05	0	1.01019e-05	9.15759e-06	9.86057e-06	5.11015e-06	0	2.33673e-05	0	0	9.91483e-05	4.8144e-06	3.97233e-05	1.43425e-05	4.74172e-06	4.7357e-06	2.03434e-05	5.00257e-05	1.01057e-05	1.98492e-05	3.54826e-05	1.43386e-05	3.49843e-05	8.69323e-05	1.93849e-05	7.11663e-05	4.48358e-06	3.5198e-05	1.43884e-05	1.39817e-05	9.49979e-06
Otu337596	0.00224179	4.84069e-06	9.53225e-06	3.24852e-05	0.000187022	4.98137e-06	1.19044e-05	9.70717e-05	1.39903e-05	4.73115e-06	2.44316e-05	1.30053e-05	4.16129e-05	1.38729e-05	4.42229e-06	5.79096e-05	2.76643e-05	5.0804e-06	2.1665e-05	0	1.01019e-05	9.15759e-06	9.86057e-06	5.11015e-06	0	2.33673e-05	0	0	9.91483e-05	4.8144e-06	3.97233e-05	1.43425e-05	4.74172e-06	4.7357e-06	2.03434e-05	5.00257e-05	1.01057e-05	1.98492e-05	3.54826e-05	1.43386e-05	3.49843e-05	8.69323e-05	1.93849e-05	7.11663e-05	4.48358e-06	3.5198e-05	1.43884e-05	1.39817e-05	9.49979e-06
unclassified	0	0	0	0	4.79543e-05	0	0	0	0	0	0	0	0	0	0	0	0	0	0	0	0	0	0	0	0	0	0	0	9.91483e-06	0	0	0	0	0	5.08585e-06	0	0	4.96231e-06	0	0	0	0	0	9.48884e-06	0	0	0	0	0
Otu343488	0	0	0	0	4.79543e-05	0	0	0	0	0	0	0	0	0	0	0	0	0	0	0	0	0	0	0	0	0	0	0	9.91483e-06	0	0	0	0	0	5.08585e-06	0	0	4.96231e-06	0	0	0	0	0	9.48884e-06	0	0	0	0	0
Brucellaceae	4.6318e-06	0	2.38306e-05	4.64074e-06	0	4.98137e-06	1.78566e-05	0	0	0	0	0	0	0	0	0	0	0	0	0	0	0	0	0	0	1.86939e-05	0	4.95317e-06	0.000128893	0	0	4.78085e-06	4.74172e-06	0	0.00410428	9.09558e-06	5.05285e-06	1.48869e-05	0	0	1.49933e-05	2.28769e-05	0	0	0	1.50849e-05	0	0	0
Ochrobactrum	4.6318e-06	0	2.38306e-05	4.64074e-06	0	4.98137e-06	1.78566e-05	0	0	0	0	0	0	0	0	0	0	0	0	0	0	0	0	0	0	1.86939e-05	0	4.95317e-06	0.000128893	0	0	4.78085e-06	4.74172e-06	0	0.00410428	9.09558e-06	5.05285e-06	1.48869e-05	0	0	1.49933e-05	2.28769e-05	0	0	0	1.50849e-05	0	0	0
Otu337595	4.6318e-06	0	2.38306e-05	4.64074e-06	0	4.98137e-06	1.78566e-05	0	0	0	0	0	0	0	0	0	0	0	0	0	0	0	0	0	0	1.86939e-05	0	4.95317e-06	0.000128893	0	0	4.78085e-06	4.74172e-06	0	0.00410428	9.09558e-06	5.05285e-06	1.48869e-05	0	0	1.49933e-05	2.28769e-05	0	0	0	1.50849e-05	0	0	0
Hyphomicrobiaceae	1.38954e-05	4.84069e-06	2.38306e-05	0	9.59085e-06	1.49441e-05	0	3.23572e-05	4.66342e-06	0	4.88632e-06	0	0	0	0	0	0	0	0	0	0	0	0	0	1.89321e-05	5.14081e-05	8.95704e-06	9.90634e-06	0.000183424	0	0	1.91234e-05	9.48344e-06	2.36785e-05	1.52575e-05	9.09558e-06	0	0	1.01379e-05	0	4.99775e-06	4.57538e-06	0	1.89777e-05	4.48358e-06	0	0	0	0
Devosia	1.38954e-05	4.84069e-06	2.38306e-05	0	0	1.49441e-05	0	3.23572e-05	4.66342e-06	0	4.88632e-06	0	0	0	0	0	0	0	0	0	0	0	0	0	1.89321e-05	5.14081e-05	8.95704e-06	9.90634e-06	8.42761e-05	0	0	1.43425e-05	9.48344e-06	2.36785e-05	1.52575e-05	9.09558e-06	0	0	1.01379e-05	0	4.99775e-06	4.57538e-06	0	1.89777e-05	4.48358e-06	0	0	0	0
Otu343492	0	0	4.76613e-06	0	0	9.96274e-06	0	3.23572e-05	4.66342e-06	0	0	0	0	0	0	0	0	0	0	0	0	0	0	0	0	0	0	0	4.46167e-05	0	0	9.56169e-06	0	0	0	0	0	0	1.01379e-05	0	4.99775e-06	0	0	0	4.48358e-06	0	0	0	0
Otu343563	1.38954e-05	4.84069e-06	1.90645e-05	0	0	4.98137e-06	0	0	0	0	4.88632e-06	0	0	0	0	0	0	0	0	0	0	0	0	0	1.89321e-05	5.14081e-05	8.95704e-06	9.90634e-06	3.96593e-05	0	0	4.78085e-06	9.48344e-06	2.36785e-05	1.52575e-05	9.09558e-06	0	0	0	0	0	4.57538e-06	0	1.89777e-05	0	0	0	0	0
Hyphomicrobium	0	0	0	0	0	0	0	0	0	0	0	0	0	0	0	0	0	0	0	0	0	0	0	0	0	0	0	0	1.98297e-05	0	0	4.78085e-06	0	0	0	0	0	0	0	0	0	0	0	0	0	0	0	0	0
Otu354614	0	0	0	0	0	0	0	0	0	0	0	0	0	0	0	0	0	0	0	0	0	0	0	0	0	0	0	0	1.98297e-05	0	0	4.78085e-06	0	0	0	0	0	0	0	0	0	0	0	0	0	0	0	0	0
unclassified	0	0	0	0	9.59085e-06	0	0	0	0	0	0	0	0	0	0	0	0	0	0	0	0	0	0	0	0	0	0	0	7.93187e-05	0	0	0	0	0	0	0	0	0	0	0	0	0	0	0	0	0	0	0	0
Otu343493	0	0	0	0	9.59085e-06	0	0	0	0	0	0	0	0	0	0	0	0	0	0	0	0	0	0	0	0	0	0	0	7.93187e-05	0	0	0	0	0	0	0	0	0	0	0	0	0	0	0	0	0	0	0	0
Methylobacteriaceae	0	4.84069e-06	0	0	4.79543e-06	0	0	4.62246e-05	0	0	0	4.3351e-06	0	0	0	0	0	0	0	0	0	0	0	0	0	0	0	0	2.47871e-05	0	4.96542e-06	0	0	0	0	9.09558e-06	0	0	0	0	4.99775e-06	4.11784e-05	0	1.42333e-05	0	0	0	0	0
Microvirga	0	4.84069e-06	0	0	4.79543e-06	0	0	4.62246e-05	0	0	0	4.3351e-06	0	0	0	0	0	0	0	0	0	0	0	0	0	0	0	0	2.47871e-05	0	4.96542e-06	0	0	0	0	9.09558e-06	0	0	0	0	4.99775e-06	4.11784e-05	0	1.42333e-05	0	0	0	0	0
Otu343559	0	4.84069e-06	0	0	4.79543e-06	0	0	4.62246e-05	0	0	0	4.3351e-06	0	0	0	0	0	0	0	0	0	0	0	0	0	0	0	0	2.47871e-05	0	4.96542e-06	0	0	0	0	9.09558e-06	0	0	0	0	4.99775e-06	4.11784e-05	0	1.42333e-05	0	0	0	0	0
Phyllobacteriaceae	0.00375639	9.68139e-06	1.42984e-05	0.00548071	5.75451e-05	1.99255e-05	1.78566e-05	0.000314327	0.000125912	1.41935e-05	4.88632e-05	1.73404e-05	0.000129462	2.31215e-05	4.42229e-06	0.000374185	7.37715e-05	1.01608e-05	4.333e-06	1.33504e-05	6.56622e-05	1.83152e-05	1.47909e-05	0	2.83982e-05	2.33673e-05	4.47852e-06	3.96253e-05	8.92335e-05	0	3.47579e-05	1.43425e-05	9.48344e-06	3.31499e-05	5.08585e-06	0.000104599	5.05285e-05	1.48869e-05	5.06894e-06	4.30157e-05	2.99865e-05	6.40553e-05	2.90774e-05	8.53995e-05	4.48358e-06	7.0396e-05	9.59228e-06	8.85508e-05	4.74989e-06
Aquamicrobium	0	0	0	4.64074e-06	0	0	5.9522e-06	0	0	0	0	4.3351e-06	0	0	0	8.90916e-06	0	1.01608e-05	0	0	0	0	0	0	0	0	0	0	2.97445e-05	0	0	0	0	0	0	0	0	0	0	0	0	0	0	0	0	0	0	0	0
Otu344100	0	0	0	4.64074e-06	0	0	5.9522e-06	0	0	0	0	4.3351e-06	0	0	0	8.90916e-06	0	1.01608e-05	0	0	0	0	0	0	0	0	0	0	2.97445e-05	0	0	0	0	0	0	0	0	0	0	0	0	0	0	0	0	0	0	0	0
Mesorhizobium	0.00375639	9.68139e-06	1.42984e-05	0.00547607	5.75451e-05	1.99255e-05	1.19044e-05	0.000314327	0.000125912	1.41935e-05	4.88632e-05	1.30053e-05	0.000129462	2.31215e-05	4.42229e-06	0.000365276	7.37715e-05	0	4.333e-06	1.33504e-05	6.56622e-05	1.83152e-05	1.47909e-05	0	2.83982e-05	2.33673e-05	4.47852e-06	3.96253e-05	5.9489e-05	0	3.47579e-05	1.43425e-05	9.48344e-06	3.31499e-05	5.08585e-06	0.000104599	5.05285e-05	1.48869e-05	5.06894e-06	4.30157e-05	2.99865e-05	6.40553e-05	2.90774e-05	8.53995e-05	4.48358e-06	7.0396e-05	9.59228e-06	8.85508e-05	4.74989e-06
Otu331521	0.00375639	9.68139e-06	1.42984e-05	0.00547607	5.75451e-05	1.99255e-05	1.19044e-05	0.000314327	0.000125912	1.41935e-05	4.88632e-05	1.30053e-05	0.000129462	2.31215e-05	4.42229e-06	0.000365276	7.37715e-05	0	4.333e-06	1.33504e-05	6.56622e-05	1.83152e-05	1.47909e-05	0	2.83982e-05	2.33673e-05	4.47852e-06	3.96253e-05	5.9489e-05	0	3.47579e-05	1.43425e-05	9.48344e-06	3.31499e-05	5.08585e-06	0.000104599	5.05285e-05	1.48869e-05	5.06894e-06	4.30157e-05	2.99865e-05	6.40553e-05	2.90774e-05	8.53995e-05	4.48358e-06	7.0396e-05	9.59228e-06	8.85508e-05	4.74989e-06
Rhizobiaceae	9.26359e-06	4.35662e-05	0	9.28147e-06	0	4.98137e-06	2.9761e-05	7.85818e-05	3.26439e-05	4.73115e-06	0	4.3351e-06	0	4.6243e-06	0	1.78183e-05	0	0	0	0	0	4.5788e-06	4.93029e-06	0	4.73303e-06	1.40204e-05	8.95704e-06	4.45785e-05	7.93187e-05	1.44432e-05	9.93083e-06	2.39042e-05	9.48344e-06	1.42071e-05	1.01717e-05	0	5.05285e-06	9.92462e-06	2.02758e-05	1.43386e-05	2.99865e-05	6.40553e-05	4.84623e-06	1.89777e-05	0	5.02828e-06	0	0	0
Rhizobium	9.26359e-06	4.35662e-05	0	9.28147e-06	0	4.98137e-06	2.9761e-05	7.85818e-05	3.26439e-05	4.73115e-06	0	4.3351e-06	0	4.6243e-06	0	1.78183e-05	0	0	0	0	0	4.5788e-06	4.93029e-06	0	4.73303e-06	1.40204e-05	8.95704e-06	4.45785e-05	7.93187e-05	1.44432e-05	9.93083e-06	2.39042e-05	9.48344e-06	1.42071e-05	1.01717e-05	0	5.05285e-06	9.92462e-06	2.02758e-05	1.43386e-05	2.99865e-05	6.40553e-05	4.84623e-06	1.89777e-05	0	5.02828e-06	0	0	0
Otu343510	9.26359e-06	4.35662e-05	0	9.28147e-06	0	4.98137e-06	2.9761e-05	7.85818e-05	3.26439e-05	4.73115e-06	0	4.3351e-06	0	4.6243e-06	0	1.78183e-05	0	0	0	0	0	4.5788e-06	4.93029e-06	0	4.73303e-06	1.40204e-05	8.95704e-06	4.45785e-05	7.93187e-05	1.44432e-05	9.93083e-06	2.39042e-05	9.48344e-06	1.42071e-05	1.01717e-05	0	5.05285e-06	9.92462e-06	2.02758e-05	1.43386e-05	2.99865e-05	6.40553e-05	4.84623e-06	1.89777e-05	0	5.02828e-06	0	0	0
Rhizobiales_incertae_sedis	0.00031033	3.87255e-05	2.85968e-05	0.000770362	0.000100704	6.97392e-05	8.92831e-05	0.000462246	0.000247161	4.73115e-05	0.000117272	0.000104042	0.000124839	4.6243e-05	4.86452e-05	0.00015591	8.29929e-05	1.52412e-05	8.2327e-05	2.67007e-05	3.03056e-05	1.83152e-05	4.43726e-05	0	1.89321e-05	8.87958e-05	1.79141e-05	8.42039e-05	4.95742e-05	3.37008e-05	0.000208547	8.60552e-05	2.84503e-05	6.62998e-05	4.57726e-05	0.000236485	5.05285e-05	3.96985e-05	7.60341e-05	0.000114708	7.49663e-05	0.000471264	0.000116309	0.00036532	7.17373e-05	0.00020616	5.27575e-05	0.000270313	6.64985e-05
Phreatobacter	0.00031033	3.87255e-05	2.85968e-05	0.000770362	0.000100704	6.97392e-05	8.92831e-05	0.000462246	0.000247161	4.73115e-05	0.000117272	0.000104042	0.000124839	4.6243e-05	4.86452e-05	0.00015591	8.29929e-05	1.52412e-05	8.2327e-05	2.67007e-05	3.03056e-05	1.83152e-05	4.43726e-05	0	1.89321e-05	8.87958e-05	1.79141e-05	8.42039e-05	4.46167e-05	3.37008e-05	0.000208547	8.60552e-05	2.84503e-05	6.62998e-05	4.57726e-05	0.000236485	5.05285e-05	3.96985e-05	7.60341e-05	0.000114708	7.49663e-05	0.000471264	0.000116309	0.00036532	7.17373e-05	0.00020616	5.27575e-05	0.000270313	6.64985e-05
Otu337597	0.00031033	3.87255e-05	2.85968e-05	0.000770362	0.000100704	6.97392e-05	8.92831e-05	0.000462246	0.000247161	4.73115e-05	0.000117272	0.000104042	0.000124839	4.6243e-05	4.86452e-05	0.00015591	8.29929e-05	1.52412e-05	8.2327e-05	2.67007e-05	3.03056e-05	1.83152e-05	4.43726e-05	0	1.89321e-05	8.87958e-05	1.79141e-05	8.42039e-05	4.46167e-05	3.37008e-05	0.000208547	8.60552e-05	2.84503e-05	6.62998e-05	4.57726e-05	0.000236485	5.05285e-05	3.96985e-05	7.60341e-05	0.000114708	7.49663e-05	0.000471264	0.000116309	0.00036532	7.17373e-05	0.00020616	5.27575e-05	0.000270313	6.64985e-05
unclassified	0	0	0	0	0	0	0	0	0	0	0	0	0	0	0	0	0	0	0	0	0	0	0	0	0	0	0	0	4.95742e-06	0	0	0	0	0	0	0	0	0	0	0	0	0	0	0	0	0	0	0	0
Otu343502	0	0	0	0	0	0	0	0	0	0	0	0	0	0	0	0	0	0	0	0	0	0	0	0	0	0	0	0	4.95742e-06	0	0	0	0	0	0	0	0	0	0	0	0	0	0	0	0	0	0	0	0
unclassified	0	0	0	0	0	0	1.19044e-05	0	0	4.73115e-06	2.44316e-05	0	0	0	0	0	4.61072e-06	5.0804e-06	0	0	0	0	0	0	0	0	0	0	8.92335e-05	0	0	0	0	2.36785e-05	0.000223777	0	0	0	0	0	2.49888e-05	0	0	1.42333e-05	4.48358e-06	0	0	0	0
unclassified	0	0	0	0	0	0	1.19044e-05	0	0	4.73115e-06	2.44316e-05	0	0	0	0	0	4.61072e-06	5.0804e-06	0	0	0	0	0	0	0	0	0	0	8.92335e-05	0	0	0	0	2.36785e-05	0.000223777	0	0	0	0	0	2.49888e-05	0	0	1.42333e-05	4.48358e-06	0	0	0	0
Otu343469	0	0	0	0	0	0	1.19044e-05	0	0	4.73115e-06	1.95453e-05	0	0	0	0	0	4.61072e-06	5.0804e-06	0	0	0	0	0	0	0	0	0	0	0	0	0	0	0	2.36785e-05	0.000223777	0	0	0	0	0	1.49933e-05	0	0	1.42333e-05	4.48358e-06	0	0	0	0
Otu343483	0	0	0	0	0	0	0	0	0	0	0	0	0	0	0	0	0	0	0	0	0	0	0	0	0	0	0	0	4.95742e-06	0	0	0	0	0	0	0	0	0	0	0	0	0	0	0	0	0	0	0	0
Otu343487	0	0	0	0	0	0	0	0	0	0	4.88632e-06	0	0	0	0	0	0	0	0	0	0	0	0	0	0	0	0	0	1.98297e-05	0	0	0	0	0	0	0	0	0	0	0	0	0	0	0	0	0	0	0	0
Otu343562	0	0	0	0	0	0	0	0	0	0	0	0	0	0	0	0	0	0	0	0	0	0	0	0	0	0	0	0	3.47019e-05	0	0	0	0	0	0	0	0	0	0	0	9.9955e-06	0	0	0	0	0	0	0	0
Otu349454	0	0	0	0	0	0	0	0	0	0	0	0	0	0	0	0	0	0	0	0	0	0	0	0	0	0	0	0	2.97445e-05	0	0	0	0	0	0	0	0	0	0	0	0	0	0	0	0	0	0	0	0
Rhodobacterales	0	0	0	1.39222e-05	4.79543e-06	9.96274e-06	0	0.00028197	9.32684e-06	2.83869e-05	4.88632e-06	0	4.62366e-06	2.31215e-05	0	8.90916e-06	9.22143e-06	5.0804e-06	4.333e-06	8.90024e-06	5.05094e-06	4.12092e-05	0	0	1.41991e-05	0	0	2.47658e-05	0.000376764	4.8144e-06	4.96542e-06	1.91234e-05	0	2.36785e-05	0	0	0	0	1.01379e-05	4.77952e-06	0	9.15076e-06	4.84623e-06	9.01439e-05	1.34507e-05	3.5198e-05	4.79614e-06	1.39817e-05	4.74989e-06
Rhodobacteraceae	0	0	0	1.39222e-05	4.79543e-06	9.96274e-06	0	0.00028197	9.32684e-06	2.83869e-05	4.88632e-06	0	4.62366e-06	2.31215e-05	0	8.90916e-06	9.22143e-06	5.0804e-06	4.333e-06	8.90024e-06	5.05094e-06	4.12092e-05	0	0	1.41991e-05	0	0	2.47658e-05	0.000376764	4.8144e-06	4.96542e-06	1.91234e-05	0	2.36785e-05	0	0	0	0	1.01379e-05	4.77952e-06	0	9.15076e-06	4.84623e-06	9.01439e-05	1.34507e-05	3.5198e-05	4.79614e-06	1.39817e-05	4.74989e-06
Amaricoccus	0	0	0	0	0	0	0	0	0	0	0	0	0	0	0	0	0	0	0	0	0	0	0	0	0	0	0	0	0	0	0	0	0	0	0	0	0	0	0	0	0	0	0	0	0	0	0	0	0
Otu349452	0	0	0	0	0	0	0	0	0	0	0	0	0	0	0	0	0	0	0	0	0	0	0	0	0	0	0	0	0	0	0	0	0	0	0	0	0	0	0	0	0	0	0	0	0	0	0	0	0
Gemmobacter	0	0	0	4.64074e-06	4.79543e-06	0	0	0	0	0	0	0	0	0	0	0	0	5.0804e-06	0	8.90024e-06	0	0	0	0	0	0	0	0	0.000262743	0	0	9.56169e-06	0	0	0	0	0	0	0	0	0	0	0	4.74442e-06	0	1.50849e-05	4.79614e-06	1.39817e-05	0
Otu343499	0	0	0	4.64074e-06	4.79543e-06	0	0	0	0	0	0	0	0	0	0	0	0	5.0804e-06	0	8.90024e-06	0	0	0	0	0	0	0	0	0.000262743	0	0	9.56169e-06	0	0	0	0	0	0	0	0	0	0	0	4.74442e-06	0	1.50849e-05	4.79614e-06	1.39817e-05	0
Jannaschia	0	0	0	4.64074e-06	0	0	0	6.0092e-05	0	0	0	0	0	1.38729e-05	0	4.45458e-06	4.61072e-06	0	0	0	5.05094e-06	1.37364e-05	0	0	0	0	0	1.48595e-05	0	0	0	0	0	0	0	0	0	0	0	0	0	0	0	4.74442e-06	0	0	0	0	0
Otu343549	0	0	0	4.64074e-06	0	0	0	6.0092e-05	0	0	0	0	0	1.38729e-05	0	4.45458e-06	4.61072e-06	0	0	0	5.05094e-06	1.37364e-05	0	0	0	0	0	1.48595e-05	0	0	0	0	0	0	0	0	0	0	0	0	0	0	0	4.74442e-06	0	0	0	0	0
Loktanella	0	0	0	0	0	9.96274e-06	0	0	0	0	0	0	0	0	0	0	0	0	4.333e-06	0	0	0	0	0	0	0	0	0	9.41909e-05	0	0	0	0	0	0	0	0	0	0	0	0	4.57538e-06	0	0	0	0	0	0	0
Otu343816	0	0	0	0	0	9.96274e-06	0	0	0	0	0	0	0	0	0	0	0	0	4.333e-06	0	0	0	0	0	0	0	0	0	9.41909e-05	0	0	0	0	0	0	0	0	0	0	0	0	4.57538e-06	0	0	0	0	0	0	0
Paracoccus	0	0	0	4.64074e-06	0	0	0	0	0	9.4623e-06	0	0	0	0	0	0	0	0	0	0	0	0	0	0	4.73303e-06	0	0	0	9.91483e-06	0	0	9.56169e-06	0	2.36785e-05	0	0	0	0	0	4.77952e-06	0	4.57538e-06	4.84623e-06	8.06551e-05	4.48358e-06	1.50849e-05	0	0	4.74989e-06
Otu343477	0	0	0	4.64074e-06	0	0	0	0	0	9.4623e-06	0	0	0	0	0	0	0	0	0	0	0	0	0	0	4.73303e-06	0	0	0	9.91483e-06	0	0	9.56169e-06	0	2.36785e-05	0	0	0	0	0	4.77952e-06	0	4.57538e-06	4.84623e-06	8.06551e-05	4.48358e-06	1.50849e-05	0	0	4.74989e-06
Rhodobaca	0	0	0	0	0	0	0	0	0	0	0	0	0	0	0	0	0	0	0	0	0	0	0	0	4.73303e-06	0	0	0	0	0	0	0	0	0	0	0	0	0	0	0	0	0	0	0	8.96716e-06	0	0	0	0
Otu343541	0	0	0	0	0	0	0	0	0	0	0	0	0	0	0	0	0	0	0	0	0	0	0	0	4.73303e-06	0	0	0	0	0	0	0	0	0	0	0	0	0	0	0	0	0	0	0	8.96716e-06	0	0	0	0
Roseovarius	0	0	0	0	0	0	0	6.0092e-05	0	1.41935e-05	0	0	4.62366e-06	0	0	4.45458e-06	4.61072e-06	0	0	0	0	4.5788e-06	0	0	4.73303e-06	0	0	4.95317e-06	9.91483e-06	0	4.96542e-06	0	0	0	0	0	0	0	0	0	0	0	0	0	0	0	0	0	0
Otu344182	0	0	0	0	0	0	0	6.0092e-05	0	1.41935e-05	0	0	4.62366e-06	0	0	4.45458e-06	4.61072e-06	0	0	0	0	4.5788e-06	0	0	4.73303e-06	0	0	4.95317e-06	9.91483e-06	0	4.96542e-06	0	0	0	0	0	0	0	0	0	0	0	0	0	0	0	0	0	0
unclassified	0	0	0	0	0	0	0	0.000161786	9.32684e-06	4.73115e-06	4.88632e-06	0	0	9.2486e-06	0	0	0	0	0	0	0	2.2894e-05	0	0	0	0	0	4.95317e-06	0	4.8144e-06	0	0	0	0	0	0	0	0	1.01379e-05	0	0	0	0	0	0	5.02828e-06	0	0	0
Otu343489	0	0	0	0	0	0	0	7.85818e-05	0	0	0	0	0	0	0	0	0	0	0	0	0	4.5788e-06	0	0	0	0	0	4.95317e-06	0	0	0	0	0	0	0	0	0	0	1.01379e-05	0	0	0	0	0	0	0	0	0	0
Otu343494	0	0	0	0	0	0	0	8.32043e-05	9.32684e-06	4.73115e-06	4.88632e-06	0	0	9.2486e-06	0	0	0	0	0	0	0	1.83152e-05	0	0	0	0	0	0	0	4.8144e-06	0	0	0	0	0	0	0	0	0	0	0	0	0	0	0	5.02828e-06	0	0	0
Rhodospirillales	2.3159e-05	0.000183946	0	0	0.000187022	0	0.000166662	0.000254235	9.79318e-05	6.1505e-05	0.000131931	6.93617e-05	2.31183e-05	9.2486e-06	0	4.45458e-06	0	0	0	0	0	4.5788e-06	0	0	0	4.67347e-06	0	0	0.000312317	0	1.98617e-05	0	4.74172e-06	0	2.54292e-05	4.54779e-06	0	7.9397e-05	3.54826e-05	8.60314e-05	5.9973e-05	0.000169289	6.78472e-05	0.000422253	2.69015e-05	0	4.79614e-06	4.66057e-06	0
Acetobacteraceae	0	0	0	0	0	0	0.000166662	0.000171031	9.79318e-05	6.1505e-05	0.000131931	6.93617e-05	4.62366e-06	9.2486e-06	0	0	0	0	0	0	0	0	0	0	0	0	0	0	0	0	1.48962e-05	0	0	0	0	0	0	0	3.54826e-05	7.16928e-05	5.9973e-05	0.000155563	6.78472e-05	0.000412764	1.79343e-05	0	0	0	0
Gluconobacter	0	0	0	0	0	0	0.000166662	0.000171031	9.79318e-05	6.1505e-05	0.000131931	6.93617e-05	4.62366e-06	9.2486e-06	0	0	0	0	0	0	0	0	0	0	0	0	0	0	0	0	1.48962e-05	0	0	0	0	0	0	0	3.54826e-05	7.16928e-05	5.9973e-05	0.000155563	6.78472e-05	0.000412764	1.79343e-05	0	0	0	0
Otu343459	0	0	0	0	0	0	0.000166662	0.000171031	9.79318e-05	6.1505e-05	0.000131931	6.93617e-05	4.62366e-06	9.2486e-06	0	0	0	0	0	0	0	0	0	0	0	0	0	0	0	0	1.48962e-05	0	0	0	0	0	0	0	3.54826e-05	7.16928e-05	5.9973e-05	0.000155563	6.78472e-05	0.000412764	1.79343e-05	0	0	0	0
NA	4.6318e-06	0	0	0	0.000187022	0	0	1.84898e-05	0	0	0	0	1.84946e-05	0	0	0	0	0	0	0	0	0	0	0	0	0	0	0	8.92335e-05	0	0	0	0	0	2.54292e-05	4.54779e-06	0	7.9397e-05	0	0	0	4.57538e-06	0	0	0	0	4.79614e-06	4.66057e-06	0
Rhodospirillaceae	1.85272e-05	0.000183946	0	0	0	0	0	6.47144e-05	0	0	0	0	0	0	0	4.45458e-06	0	0	0	0	0	4.5788e-06	0	0	0	4.67347e-06	0	0	0.000223084	0	4.96542e-06	0	4.74172e-06	0	0	0	0	0	0	1.43386e-05	0	9.15076e-06	0	9.48884e-06	8.96716e-06	0	0	0	0
Azospirillum	1.38954e-05	0.000183946	0	0	0	0	0	0	0	0	0	0	0	0	0	0	0	0	0	0	0	0	0	0	0	4.67347e-06	0	0	0	0	0	0	4.74172e-06	0	0	0	0	0	0	0	0	9.15076e-06	0	0	0	0	0	0	0
Otu342496	1.38954e-05	0.000183946	0	0	0	0	0	0	0	0	0	0	0	0	0	0	0	0	0	0	0	0	0	0	0	4.67347e-06	0	0	0	0	0	0	4.74172e-06	0	0	0	0	0	0	0	0	9.15076e-06	0	0	0	0	0	0	0
Lacibacterium	0	0	0	0	0	0	0	0	0	0	0	0	0	0	0	0	0	0	0	0	0	0	0	0	0	0	0	0	0.000178467	0	0	0	0	0	0	0	0	0	0	0	0	0	0	0	0	0	0	0	0
Otu343471	0	0	0	0	0	0	0	0	0	0	0	0	0	0	0	0	0	0	0	0	0	0	0	0	0	0	0	0	0.000178467	0	0	0	0	0	0	0	0	0	0	0	0	0	0	0	0	0	0	0	0
Skermanella	0	0	0	0	0	0	0	0	0	0	0	0	0	0	0	4.45458e-06	0	0	0	0	0	0	0	0	0	0	0	0	2.97445e-05	0	0	0	0	0	0	0	0	0	0	1.43386e-05	0	0	0	9.48884e-06	4.48358e-06	0	0	0	0
Otu337608	0	0	0	0	0	0	0	0	0	0	0	0	0	0	0	4.45458e-06	0	0	0	0	0	0	0	0	0	0	0	0	2.97445e-05	0	0	0	0	0	0	0	0	0	0	1.43386e-05	0	0	0	9.48884e-06	4.48358e-06	0	0	0	0
unclassified	4.6318e-06	0	0	0	0	0	0	6.47144e-05	0	0	0	0	0	0	0	0	0	0	0	0	0	4.5788e-06	0	0	0	0	0	0	1.48722e-05	0	4.96542e-06	0	0	0	0	0	0	0	0	0	0	0	0	0	4.48358e-06	0	0	0	0
Otu531810	4.6318e-06	0	0	0	0	0	0	6.47144e-05	0	0	0	0	0	0	0	0	0	0	0	0	0	4.5788e-06	0	0	0	0	0	0	1.48722e-05	0	4.96542e-06	0	0	0	0	0	0	0	0	0	0	0	0	0	4.48358e-06	0	0	0	0
Sphingomonadales	8.80041e-05	1.93628e-05	6.19596e-05	0.000204192	0.000148658	6.97392e-05	4.16654e-05	0.000309705	0.00016322	4.73115e-05	0.000161249	6.50266e-05	6.47312e-05	4.16187e-05	4.86452e-05	7.57279e-05	6.91608e-05	5.0804e-06	1.2999e-05	2.67007e-05	5.05094e-06	4.12092e-05	1.47909e-05	1.53304e-05	9.46607e-06	7.0102e-05	2.68711e-05	2.9719e-05	0.00171527	5.29585e-05	0.000148962	9.56169e-05	4.74172e-06	0.000118393	0.000101717	0.000236485	3.03171e-05	7.9397e-05	4.56204e-05	0.000109929	0.000189915	0.000411784	3.39236e-05	0.000887206	4.03522e-05	8.04525e-05	4.31653e-05	0.000186423	4.74989e-06
Erythrobacteraceae	4.6318e-06	0	0	0	0	0	0	6.93369e-05	9.32684e-06	0	4.88632e-06	0	0	0	0	0	0	0	0	0	0	0	0	0	0	0	0	0	4.95742e-06	0	4.96542e-06	0	0	0	0	0	0	0	0	0	0	0	0	0	0	0	0	0	0
Erythrobacter	0	0	0	0	0	0	0	6.93369e-05	9.32684e-06	0	0	0	0	0	0	0	0	0	0	0	0	0	0	0	0	0	0	0	0	0	4.96542e-06	0	0	0	0	0	0	0	0	0	0	0	0	0	0	0	0	0	0
Otu343497	0	0	0	0	0	0	0	6.93369e-05	9.32684e-06	0	0	0	0	0	0	0	0	0	0	0	0	0	0	0	0	0	0	0	0	0	4.96542e-06	0	0	0	0	0	0	0	0	0	0	0	0	0	0	0	0	0	0
Porphyrobacter	4.6318e-06	0	0	0	0	0	0	0	0	0	4.88632e-06	0	0	0	0	0	0	0	0	0	0	0	0	0	0	0	0	0	4.95742e-06	0	0	0	0	0	0	0	0	0	0	0	0	0	0	0	0	0	0	0	0
Otu343500	4.6318e-06	0	0	0	0	0	0	0	0	0	4.88632e-06	0	0	0	0	0	0	0	0	0	0	0	0	0	0	0	0	0	4.95742e-06	0	0	0	0	0	0	0	0	0	0	0	0	0	0	0	0	0	0	0	0
Sphingomonadaceae	8.33723e-05	1.93628e-05	6.19596e-05	0.000204192	0.000148658	6.97392e-05	4.16654e-05	0.000240368	0.000153893	4.73115e-05	0.000156362	6.50266e-05	6.47312e-05	4.16187e-05	4.86452e-05	7.57279e-05	6.91608e-05	5.0804e-06	1.2999e-05	2.67007e-05	5.05094e-06	4.12092e-05	1.47909e-05	1.53304e-05	9.46607e-06	7.0102e-05	2.68711e-05	2.9719e-05	0.00171031	5.29585e-05	0.000143997	9.56169e-05	4.74172e-06	0.000118393	0.000101717	0.000236485	3.03171e-05	7.9397e-05	4.56204e-05	0.000109929	0.000189915	0.000411784	3.39236e-05	0.000887206	4.03522e-05	8.04525e-05	4.31653e-05	0.000186423	4.74989e-06
Novosphingobium	0	0	0	1.39222e-05	9.59085e-06	4.98137e-06	1.19044e-05	6.93369e-05	0	0	4.88632e-06	0	1.84946e-05	0	0	4.45458e-06	0	0	0	4.45012e-06	0	0	4.93029e-06	5.11015e-06	0	4.67347e-06	0	4.95317e-06	0.000252828	1.92576e-05	4.96542e-06	0	0	0	0	9.09558e-06	0	4.96231e-06	5.06894e-06	0	4.99775e-06	1.37261e-05	0	5.21886e-05	4.48358e-06	0	9.59228e-06	1.39817e-05	0
Otu343486	0	0	0	1.39222e-05	9.59085e-06	4.98137e-06	5.9522e-06	9.24492e-06	0	0	4.88632e-06	0	1.84946e-05	0	0	4.45458e-06	0	0	0	4.45012e-06	0	0	4.93029e-06	0	0	4.67347e-06	0	4.95317e-06	0.000247871	1.92576e-05	0	0	0	0	0	9.09558e-06	0	4.96231e-06	5.06894e-06	0	0	1.37261e-05	0	5.21886e-05	0	0	4.79614e-06	1.39817e-05	0
Otu344122	0	0	0	0	0	0	5.9522e-06	6.0092e-05	0	0	0	0	0	0	0	0	0	0	0	0	0	0	0	5.11015e-06	0	0	0	0	4.95742e-06	0	4.96542e-06	0	0	0	0	0	0	0	0	0	4.99775e-06	0	0	0	4.48358e-06	0	4.79614e-06	0	0
Sphingobium	0	0	0	0	0	0	0	0	2.33171e-05	0	0	0	0	0	0	0	0	0	0	0	0	0	0	0	0	0	0	0	7.93187e-05	0	0	0	0	4.7357e-06	0	9.09558e-06	0	0	0	0	0	1.37261e-05	0	0	0	0	0	0	0
Otu343466	0	0	0	0	0	0	0	0	2.33171e-05	0	0	0	0	0	0	0	0	0	0	0	0	0	0	0	0	0	0	0	5.9489e-05	0	0	0	0	4.7357e-06	0	0	0	0	0	0	0	0	0	0	0	0	0	0	0
Otu343475	0	0	0	0	0	0	0	0	0	0	0	0	0	0	0	0	0	0	0	0	0	0	0	0	0	0	0	0	1.98297e-05	0	0	0	0	0	0	9.09558e-06	0	0	0	0	0	1.37261e-05	0	0	0	0	0	0	0
Sphingomonas	7.87405e-05	1.45221e-05	6.19596e-05	0.00019027	0.000139067	6.47578e-05	2.9761e-05	0.000171031	0.000130576	4.73115e-05	0.00014659	6.50266e-05	4.62366e-05	4.16187e-05	4.86452e-05	7.12733e-05	4.14965e-05	5.0804e-06	1.2999e-05	2.22506e-05	5.05094e-06	4.12092e-05	9.86057e-06	1.02203e-05	9.46607e-06	6.0755e-05	2.68711e-05	1.98127e-05	0.00129884	3.37008e-05	0.000124135	9.08361e-05	4.74172e-06	0.000113657	0.000101717	0.000218294	3.03171e-05	7.44347e-05	4.05515e-05	0.000109929	0.000184917	0.000379757	3.39236e-05	0.000787573	3.58686e-05	8.04525e-05	3.3573e-05	0.000167781	4.74989e-06
Otu337600	0	0	0	1.39222e-05	0	0	0	0	0	0	0	0	0	0	0	0	4.61072e-06	0	0	0	0	0	4.93029e-06	5.11015e-06	0	4.67347e-06	0	0	0.000391636	0	0	4.78085e-06	0	4.7357e-06	0	0	0	0	0	0	0	0	0	4.26998e-05	0	5.02828e-06	4.79614e-06	0	0
Otu343461	2.3159e-05	0	1.42984e-05	0.000171707	0.00011509	1.99255e-05	2.38088e-05	0.000161786	7.46147e-05	3.31181e-05	7.32948e-05	1.30053e-05	2.31183e-05	4.6243e-06	1.32669e-05	5.3455e-05	1.84429e-05	5.0804e-06	4.333e-06	4.45012e-06	0	0	4.93029e-06	0	4.73303e-06	2.33673e-05	1.79141e-05	9.90634e-06	3.96593e-05	2.88864e-05	0.000114205	5.25893e-05	4.74172e-06	2.36785e-05	1.01717e-05	0.000131886	3.03171e-05	4.46608e-05	3.04136e-05	4.77952e-05	0.000184917	0.000315701	2.90774e-05	0.000346343	2.69015e-05	4.02263e-05	1.43884e-05	0.000144478	4.74989e-06
Otu343465	3.24226e-05	0	0	0	4.79543e-06	0	0	0	4.66342e-06	0	4.88632e-05	2.60106e-05	1.84946e-05	0	8.84459e-06	8.90916e-06	4.61072e-06	0	0	8.90024e-06	0	0	0	5.11015e-06	0	0	4.47852e-06	0	0.000317275	4.8144e-06	4.96542e-06	9.56169e-06	0	2.36785e-05	3.56009e-05	4.54779e-05	0	4.96231e-06	0	0	0	0	0	0.000137588	4.48358e-06	0	0	4.66057e-06	0
Otu343467	1.85272e-05	4.84069e-06	1.42984e-05	0	1.43863e-05	9.96274e-06	0	4.62246e-06	2.79805e-05	0	0	1.30053e-05	0	4.6243e-06	0	0	9.22143e-06	0	0	0	0	4.5788e-06	0	0	0	4.67347e-06	0	4.95317e-06	0.000237956	0	0	0	0	2.36785e-05	3.56009e-05	0	0	0	0	0	0	1.83015e-05	0	0.000132844	4.48358e-06	1.00566e-05	0	1.39817e-05	0
Otu343473	0	0	1.42984e-05	0	0	0	0	4.62246e-06	4.66342e-06	0	0	0	0	0	0	4.45458e-06	4.61072e-06	0	8.666e-06	0	0	9.15759e-06	0	0	0	1.86939e-05	0	0	0.00017351	0	4.96542e-06	0	0	0	0	0	0	0	0	0	0	1.37261e-05	0	0	0	0	0	0	0
Otu343498	0	0	4.76613e-06	0	0	0	0	0	0	0	4.88632e-06	0	0	0	0	0	0	0	0	4.45012e-06	0	0	0	0	0	0	0	0	3.47019e-05	0	0	0	0	4.7357e-06	0	0	0	0	0	4.77952e-06	0	0	0	2.37221e-05	0	0	0	0	0
Otu343505	0	0	0	0	0	0	0	0	0	0	0	8.67021e-06	4.62366e-06	9.2486e-06	0	0	0	0	0	0	0	0	0	0	0	4.67347e-06	0	0	0	0	0	0	0	0	1.01717e-05	0	0	0	0	0	0	1.83015e-05	0	0	0	0	0	0	0
Otu343512	0	0	0	0	0	4.98137e-06	0	0	0	0	0	0	0	0	0	4.45458e-06	0	0	0	0	0	0	0	0	0	0	0	0	5.9489e-05	0	0	0	0	0	5.08585e-06	0	0	0	0	0	0	0	0	0	0	0	0	0	0
Otu343520	4.6318e-06	9.68139e-06	1.42984e-05	4.64074e-06	0	2.98882e-05	5.9522e-06	0	1.86537e-05	9.4623e-06	1.4659e-05	0	0	2.31215e-05	2.65338e-05	0	0	0	0	4.45012e-06	5.05094e-06	2.74728e-05	0	0	4.73303e-06	4.67347e-06	4.47852e-06	4.95317e-06	3.96593e-05	0	0	2.39042e-05	0	1.89428e-05	5.08585e-06	4.09301e-05	0	2.48116e-05	1.01379e-05	5.25747e-05	0	1.37261e-05	4.84623e-06	8.53995e-05	0	2.51414e-05	1.43884e-05	0	0
Otu349453	0	0	0	0	4.79543e-06	0	0	0	0	4.73115e-06	4.88632e-06	4.3351e-06	0	0	0	0	0	0	0	0	0	0	0	0	0	0	0	0	4.95742e-06	0	0	0	0	1.42071e-05	0	0	0	0	0	4.77952e-06	0	0	0	1.89777e-05	0	0	0	4.66057e-06	0
unclassified	4.6318e-06	4.84069e-06	0	0	0	0	0	0	0	0	4.88632e-06	0	0	0	0	0	2.76643e-05	0	0	0	0	0	0	0	0	4.67347e-06	0	4.95317e-06	7.93187e-05	0	1.48962e-05	4.78085e-06	0	0	0	0	0	0	0	0	0	4.57538e-06	0	4.74442e-05	0	0	0	4.66057e-06	0
Otu343479	4.6318e-06	4.84069e-06	0	0	0	0	0	0	0	0	4.88632e-06	0	0	0	0	0	2.76643e-05	0	0	0	0	0	0	0	0	4.67347e-06	0	4.95317e-06	7.93187e-05	0	1.48962e-05	4.78085e-06	0	0	0	0	0	0	0	0	0	4.57538e-06	0	4.74442e-05	0	0	0	4.66057e-06	0
Betaproteobacteria	0.000472443	0.000590565	0.000109621	0.0017774	0.00114131	0.000498137	0.000559507	0.00376268	0.0012498	0.000510964	0.000874651	0.000624255	0.000910861	0.000476303	0.000672189	0.00147892	0.000594783	0.000106688	0.000493962	0.000115703	4.54584e-05	0.000274728	0.000236654	4.59913e-05	0.000132525	0.000481367	7.16563e-05	0.000292237	0.00132363	0.000245535	0.00131584	0.0004494	0.00013751	0.000421477	0.000676418	0.00236485	0.000328435	0.000421796	0.000694444	0.000645235	0.00103953	0.00323022	0.000508854	0.00445026	0.000439391	0.00185041	0.000326138	0.00125835	0.000251744
Burkholderiales	0.000472443	0.000590565	0.000109621	0.00177276	0.00114131	0.000498137	0.000559507	0.00362401	0.00123581	0.000501502	0.000869765	0.000615585	0.000906237	0.000476303	0.000672189	0.00147447	0.000594783	0.000101608	0.000489629	0.000115703	4.04075e-05	0.000274728	0.000236654	4.59913e-05	0.000132525	0.000476693	7.16563e-05	0.000292237	0.000827888	0.000245535	0.00129597	0.0004494	0.00013751	0.000421477	0.000671332	0.0023603	0.000328435	0.000421796	0.000593066	0.000640456	0.00102954	0.00321649	0.000504008	0.00439808	0.000439391	0.00184538	0.000321341	0.00125369	0.000251744
Alcaligenaceae	4.6318e-06	0	2.38306e-05	0	0	0	0	0	9.32684e-06	0	0	0	0	0	0	0	0	0	4.333e-06	0	0	0	0	0	4.73303e-06	0	0	0	9.41909e-05	0	0	0	0	1.89428e-05	0.000427211	0	0	0	0	0	0	0	0	1.42333e-05	0	0	0	0	0
Achromobacter	4.6318e-06	0	2.38306e-05	0	0	0	0	0	9.32684e-06	0	0	0	0	0	0	0	0	0	0	0	0	0	0	0	4.73303e-06	0	0	0	2.47871e-05	0	0	0	0	1.89428e-05	0.000427211	0	0	0	0	0	0	0	0	1.42333e-05	0	0	0	0	0
Otu977	4.6318e-06	0	2.38306e-05	0	0	0	0	0	9.32684e-06	0	0	0	0	0	0	0	0	0	0	0	0	0	0	0	4.73303e-06	0	0	0	2.47871e-05	0	0	0	0	1.89428e-05	0.000427211	0	0	0	0	0	0	0	0	1.42333e-05	0	0	0	0	0
Advenella	0	0	0	0	0	0	0	0	0	0	0	0	0	0	0	0	0	0	4.333e-06	0	0	0	0	0	0	0	0	0	9.91483e-06	0	0	0	0	0	0	0	0	0	0	0	0	0	0	0	0	0	0	0	0
Otu530745	0	0	0	0	0	0	0	0	0	0	0	0	0	0	0	0	0	0	4.333e-06	0	0	0	0	0	0	0	0	0	9.91483e-06	0	0	0	0	0	0	0	0	0	0	0	0	0	0	0	0	0	0	0	0
Pusillimonas	0	0	0	0	0	0	0	0	0	0	0	0	0	0	0	0	0	0	0	0	0	0	0	0	0	0	0	0	5.9489e-05	0	0	0	0	0	0	0	0	0	0	0	0	0	0	0	0	0	0	0	0
Otu1408	0	0	0	0	0	0	0	0	0	0	0	0	0	0	0	0	0	0	0	0	0	0	0	0	0	0	0	0	5.9489e-05	0	0	0	0	0	0	0	0	0	0	0	0	0	0	0	0	0	0	0	0
Burkholderiaceae	0.000458548	0.000246875	7.6258e-05	0.00177276	0.00101663	0.000498137	0.000553555	0.00357778	0.00121249	0.000477846	0.000855106	0.00061125	0.00089699	0.000476303	0.000667766	0.00147447	0.000594783	0.000101608	0.000472297	0.000115703	4.04075e-05	0.000242676	0.000221863	4.59913e-05	0.000127792	0.00047202	7.16563e-05	0.000287284	0.000297445	0.00024072	0.00129101	0.000444619	0.00013751	0.000402535	0.000228863	0.0023603	0.000328435	0.000401947	0.000547445	0.000635676	0.00100455	0.0029557	0.000504008	0.00404224	0.000439391	0.00184035	0.000321341	0.00124437	0.000251744
Burkholderia	0.000453916	0.000242035	7.14919e-05	0.00171707	0.00100704	0.000498137	0.000553555	0.00354543	0.00117984	0.000473115	0.000855106	0.000606914	0.000878495	0.000476303	0.000658922	0.00147001	0.000585561	0.000101608	0.000472297	0.000115703	4.04075e-05	0.000233519	0.000221863	4.08812e-05	0.000127792	0.000462673	7.16563e-05	0.000287284	0.000272658	0.00024072	0.00128108	0.000444619	0.00013751	0.000397799	0.000228863	0.00235121	0.000323383	0.000396985	0.000547445	0.000630897	0.00100455	0.00295112	0.000504008	0.0040375	0.000430424	0.00182527	0.000321341	0.00121641	0.000251744
Otu212	0.000453916	0.000242035	7.14919e-05	0.00171707	0.00100704	0.000498137	0.000553555	0.00354543	0.00117984	0.000473115	0.000855106	0.000606914	0.000878495	0.000476303	0.000658922	0.00147001	0.000585561	0.000101608	0.000472297	0.000115703	4.04075e-05	0.000233519	0.000221863	4.08812e-05	0.000127792	0.000462673	7.16563e-05	0.000287284	0.000272658	0.00024072	0.00128108	0.000444619	0.00013751	0.000397799	0.000228863	0.00235121	0.000323383	0.000396985	0.000547445	0.000630897	0.00100455	0.00295112	0.000504008	0.0040375	0.000430424	0.00182527	0.000321341	0.00121641	0.000251744
Ralstonia	4.6318e-06	4.84069e-06	4.76613e-06	5.56888e-05	9.59085e-06	0	0	3.23572e-05	3.26439e-05	4.73115e-06	0	4.3351e-06	1.84946e-05	0	8.84459e-06	4.45458e-06	9.22143e-06	0	0	0	0	9.15759e-06	0	5.11015e-06	0	9.34693e-06	0	0	4.95742e-06	0	9.93083e-06	0	0	4.7357e-06	0	9.09558e-06	5.05285e-06	4.96231e-06	0	4.77952e-06	0	4.57538e-06	0	4.74442e-06	8.96716e-06	5.02828e-06	0	2.79634e-05	0
Otu1111	4.6318e-06	4.84069e-06	4.76613e-06	5.56888e-05	9.59085e-06	0	0	3.23572e-05	3.26439e-05	4.73115e-06	0	4.3351e-06	1.84946e-05	0	8.84459e-06	4.45458e-06	9.22143e-06	0	0	0	0	9.15759e-06	0	5.11015e-06	0	9.34693e-06	0	0	4.95742e-06	0	9.93083e-06	0	0	4.7357e-06	0	9.09558e-06	5.05285e-06	4.96231e-06	0	4.77952e-06	0	4.57538e-06	0	4.74442e-06	8.96716e-06	5.02828e-06	0	2.79634e-05	0
unclassified	0	0	0	0	0	0	0	0	0	0	0	0	0	0	0	0	0	0	0	0	0	0	0	0	0	0	0	0	1.98297e-05	0	0	0	0	0	0	0	0	0	0	0	0	0	0	0	0	1.00566e-05	0	0	0
Otu1838	0	0	0	0	0	0	0	0	0	0	0	0	0	0	0	0	0	0	0	0	0	0	0	0	0	0	0	0	1.98297e-05	0	0	0	0	0	0	0	0	0	0	0	0	0	0	0	0	1.00566e-05	0	0	0
Burkholderiales_incertae_sedis	0	6.2929e-05	0	0	0	0	0	0	0	0	0	0	0	0	4.42229e-06	0	0	0	0	0	0	0	0	0	0	0	0	0	0	0	0	0	0	0	0	0	0	0	0	0	0	0	0	0	0	0	0	0	0
Aquabacterium	0	6.2929e-05	0	0	0	0	0	0	0	0	0	0	0	0	4.42229e-06	0	0	0	0	0	0	0	0	0	0	0	0	0	0	0	0	0	0	0	0	0	0	0	0	0	0	0	0	0	0	0	0	0	0
Otu1051	0	6.2929e-05	0	0	0	0	0	0	0	0	0	0	0	0	4.42229e-06	0	0	0	0	0	0	0	0	0	0	0	0	0	0	0	0	0	0	0	0	0	0	0	0	0	0	0	0	0	0	0	0	0	0
Comamonadaceae	9.26359e-06	8.71325e-05	9.53225e-06	0	0.000124681	0	5.9522e-06	4.62246e-05	0	2.36558e-05	0	4.3351e-06	9.24731e-06	0	0	0	0	0	1.2999e-05	0	0	3.20516e-05	1.47909e-05	0	0	4.67347e-06	0	4.95317e-06	0.00015368	0	4.96542e-06	4.78085e-06	0	0	1.52575e-05	0	0	1.48869e-05	3.54826e-05	4.77952e-06	2.49888e-05	0.000260797	0	0.000336854	0	5.02828e-06	0	9.32114e-06	0
Comamonas	0	0	0	0	0	0	0	0	0	0	0	0	0	0	0	0	0	0	0	0	0	0	0	0	0	0	0	0	4.95742e-06	0	0	0	0	0	0	0	0	0	0	0	0	0	0	0	0	0	0	9.32114e-06	0
Otu97133	0	0	0	0	0	0	0	0	0	0	0	0	0	0	0	0	0	0	0	0	0	0	0	0	0	0	0	0	4.95742e-06	0	0	0	0	0	0	0	0	0	0	0	0	0	0	0	0	0	0	9.32114e-06	0
Delftia	0	8.71325e-05	9.53225e-06	0	0	0	0	1.84898e-05	0	2.36558e-05	0	0	0	0	0	0	0	0	8.666e-06	0	0	2.2894e-05	9.86057e-06	0	0	0	0	0	1.98297e-05	0	4.96542e-06	0	0	0	1.52575e-05	0	0	1.48869e-05	3.04136e-05	0	2.49888e-05	0.000219618	0	0.000298898	0	0	0	0	0
Otu231	0	8.71325e-05	9.53225e-06	0	0	0	0	1.84898e-05	0	2.36558e-05	0	0	0	0	0	0	0	0	8.666e-06	0	0	2.2894e-05	9.86057e-06	0	0	0	0	0	1.98297e-05	0	4.96542e-06	0	0	0	1.52575e-05	0	0	1.48869e-05	3.04136e-05	0	2.49888e-05	0.000219618	0	0.000298898	0	0	0	0	0
Hydrogenophaga	0	0	0	0	0	0	5.9522e-06	2.77348e-05	0	0	0	0	0	0	0	0	0	0	0	0	0	9.15759e-06	4.93029e-06	0	0	0	0	0	4.46167e-05	0	0	0	0	0	0	0	0	0	0	4.77952e-06	0	4.11784e-05	0	2.84665e-05	0	5.02828e-06	0	0	0
Otu1098	0	0	0	0	0	0	5.9522e-06	2.77348e-05	0	0	0	0	0	0	0	0	0	0	0	0	0	9.15759e-06	4.93029e-06	0	0	0	0	0	4.46167e-05	0	0	0	0	0	0	0	0	0	0	4.77952e-06	0	4.11784e-05	0	2.84665e-05	0	5.02828e-06	0	0	0
unclassified	9.26359e-06	0	0	0	0	0	0	0	0	0	0	4.3351e-06	9.24731e-06	0	0	0	0	0	0	0	0	0	0	0	0	4.67347e-06	0	4.95317e-06	7.43612e-05	0	0	0	0	0	0	0	0	0	5.06894e-06	0	0	0	0	9.48884e-06	0	0	0	0	0
Otu1067	9.26359e-06	0	0	0	0	0	0	0	0	0	0	4.3351e-06	9.24731e-06	0	0	0	0	0	0	0	0	0	0	0	0	0	0	0	7.43612e-05	0	0	0	0	0	0	0	0	0	0	0	0	0	0	9.48884e-06	0	0	0	0	0
Otu195504	0	0	0	0	0	0	0	0	0	0	0	0	0	0	0	0	0	0	0	0	0	0	0	0	0	4.67347e-06	0	4.95317e-06	0	0	0	0	0	0	0	0	0	0	5.06894e-06	0	0	0	0	0	0	0	0	0	0
Variovorax	0	0	0	0	0.000124681	0	0	0	0	0	0	0	0	0	0	0	0	0	4.333e-06	0	0	0	0	0	0	0	0	0	9.91483e-06	0	0	4.78085e-06	0	0	0	0	0	0	0	0	0	0	0	0	0	0	0	0	0
Otu1014	0	0	0	0	0.000124681	0	0	0	0	0	0	0	0	0	0	0	0	0	4.333e-06	0	0	0	0	0	0	0	0	0	9.91483e-06	0	0	4.78085e-06	0	0	0	0	0	0	0	0	0	0	0	0	0	0	0	0	0
Oxalobacteraceae	0	0.000193628	0	0	0	0	0	0	1.39903e-05	0	1.4659e-05	0	0	0	0	0	0	0	0	0	0	0	0	0	0	0	0	0	2.97445e-05	0	0	0	0	0	0	0	0	0	5.06894e-06	0	0	0	0	0	0	0	0	0	0
Massilia	0	0.000193628	0	0	0	0	0	0	1.39903e-05	0	1.4659e-05	0	0	0	0	0	0	0	0	0	0	0	0	0	0	0	0	0	2.97445e-05	0	0	0	0	0	0	0	0	0	5.06894e-06	0	0	0	0	0	0	0	0	0	0
Otu1006	0	0.000193628	0	0	0	0	0	0	1.39903e-05	0	1.4659e-05	0	0	0	0	0	0	0	0	0	0	0	0	0	0	0	0	0	2.97445e-05	0	0	0	0	0	0	0	0	0	5.06894e-06	0	0	0	0	0	0	0	0	0	0
unclassified	0	0	0	0	0	0	0	0	0	0	0	0	0	0	0	0	0	0	0	0	0	0	0	0	0	0	0	0	0.000252828	4.8144e-06	0	0	0	0	0	0	0	4.96231e-06	5.06894e-06	0	0	0	0	4.74442e-06	0	0	0	0	0
unclassified	0	0	0	0	0	0	0	0	0	0	0	0	0	0	0	0	0	0	0	0	0	0	0	0	0	0	0	0	0.000252828	4.8144e-06	0	0	0	0	0	0	0	4.96231e-06	5.06894e-06	0	0	0	0	4.74442e-06	0	0	0	0	0
Otu1004	0	0	0	0	0	0	0	0	0	0	0	0	0	0	0	0	0	0	0	0	0	0	0	0	0	0	0	0	0.000158637	0	0	0	0	0	0	0	0	0	0	0	0	0	0	0	0	0	0	0	0
Otu1020	0	0	0	0	0	0	0	0	0	0	0	0	0	0	0	0	0	0	0	0	0	0	0	0	0	0	0	0	2.97445e-05	4.8144e-06	0	0	0	0	0	0	0	4.96231e-06	5.06894e-06	0	0	0	0	4.74442e-06	0	0	0	0	0
Otu14055	0	0	0	0	0	0	0	0	0	0	0	0	0	0	0	0	0	0	0	0	0	0	0	0	0	0	0	0	6.44464e-05	0	0	0	0	0	0	0	0	0	0	0	0	0	0	0	0	0	0	0	0
Hydrogenophilales	0	0	0	0	0	0	0	0	0	0	0	0	0	0	0	0	0	0	0	0	0	0	0	0	0	0	0	0	0	0	0	0	0	0	0	0	0	0	5.06894e-06	0	0	0	0	0	0	0	0	0	0
Hydrogenophilaceae	0	0	0	0	0	0	0	0	0	0	0	0	0	0	0	0	0	0	0	0	0	0	0	0	0	0	0	0	0	0	0	0	0	0	0	0	0	0	5.06894e-06	0	0	0	0	0	0	0	0	0	0
Thiobacillus	0	0	0	0	0	0	0	0	0	0	0	0	0	0	0	0	0	0	0	0	0	0	0	0	0	0	0	0	0	0	0	0	0	0	0	0	0	0	5.06894e-06	0	0	0	0	0	0	0	0	0	0
Otu14043	0	0	0	0	0	0	0	0	0	0	0	0	0	0	0	0	0	0	0	0	0	0	0	0	0	0	0	0	0	0	0	0	0	0	0	0	0	0	5.06894e-06	0	0	0	0	0	0	0	0	0	0
Neisseriales	0	0	0	0	0	0	0	0	0	0	0	0	0	0	0	0	0	0	0	0	0	0	0	0	0	0	0	0	0	0	9.93083e-06	0	0	0	5.08585e-06	0	0	0	0	0	0	0	0	0	0	0	0	0	0
Neisseriaceae	0	0	0	0	0	0	0	0	0	0	0	0	0	0	0	0	0	0	0	0	0	0	0	0	0	0	0	0	0	0	9.93083e-06	0	0	0	5.08585e-06	0	0	0	0	0	0	0	0	0	0	0	0	0	0
Iodobacter	0	0	0	0	0	0	0	0	0	0	0	0	0	0	0	0	0	0	0	0	0	0	0	0	0	0	0	0	0	0	9.93083e-06	0	0	0	5.08585e-06	0	0	0	0	0	0	0	0	0	0	0	0	0	0
Otu1009	0	0	0	0	0	0	0	0	0	0	0	0	0	0	0	0	0	0	0	0	0	0	0	0	0	0	0	0	0	0	9.93083e-06	0	0	0	5.08585e-06	0	0	0	0	0	0	0	0	0	0	0	0	0	0
Nitrosomonadales	0	0	0	0	0	0	0	1.38674e-05	0	4.73115e-06	0	4.3351e-06	0	0	0	0	0	0	0	0	5.05094e-06	0	0	0	0	0	0	0	0	0	4.96542e-06	0	0	0	0	0	0	0	7.09651e-05	0	0	4.57538e-06	0	0	0	0	4.79614e-06	0	0
Nitrosomonadaceae	0	0	0	0	0	0	0	1.38674e-05	0	4.73115e-06	0	4.3351e-06	0	0	0	0	0	0	0	0	5.05094e-06	0	0	0	0	0	0	0	0	0	4.96542e-06	0	0	0	0	0	0	0	7.09651e-05	0	0	4.57538e-06	0	0	0	0	4.79614e-06	0	0
Nitrosomonas	0	0	0	0	0	0	0	1.38674e-05	0	4.73115e-06	0	4.3351e-06	0	0	0	0	0	0	0	0	5.05094e-06	0	0	0	0	0	0	0	0	0	4.96542e-06	0	0	0	0	0	0	0	7.09651e-05	0	0	4.57538e-06	0	0	0	0	4.79614e-06	0	0
Otu14044	0	0	0	0	0	0	0	0	0	0	0	0	0	0	0	0	0	0	0	0	0	0	0	0	0	0	0	0	0	0	0	0	0	0	0	0	0	0	0	0	0	0	0	0	0	0	0	0	0
Otu51841	0	0	0	0	0	0	0	1.38674e-05	0	0	0	0	0	0	0	0	0	0	0	0	0	0	0	0	0	0	0	0	0	0	4.96542e-06	0	0	0	0	0	0	0	0	0	0	4.57538e-06	0	0	0	0	0	0	0
Otu58577	0	0	0	0	0	0	0	0	0	4.73115e-06	0	4.3351e-06	0	0	0	0	0	0	0	0	5.05094e-06	0	0	0	0	0	0	0	0	0	0	0	0	0	0	0	0	0	7.09651e-05	0	0	0	0	0	0	0	4.79614e-06	0	0
Rhodocyclales	0	0	0	4.64074e-06	0	0	0	1.38674e-05	0	4.73115e-06	4.88632e-06	0	0	0	0	4.45458e-06	0	5.0804e-06	0	0	0	0	0	0	0	4.67347e-06	0	0	0.000332147	0	0	0	0	0	0	4.54779e-06	0	0	2.53447e-05	4.77952e-06	9.9955e-06	9.15076e-06	4.84623e-06	1.42333e-05	0	5.02828e-06	0	4.66057e-06	0
Rhodocyclaceae	0	0	0	4.64074e-06	0	0	0	1.38674e-05	0	4.73115e-06	4.88632e-06	0	0	0	0	4.45458e-06	0	5.0804e-06	0	0	0	0	0	0	0	4.67347e-06	0	0	0.000332147	0	0	0	0	0	0	4.54779e-06	0	0	2.53447e-05	4.77952e-06	9.9955e-06	9.15076e-06	4.84623e-06	1.42333e-05	0	5.02828e-06	0	4.66057e-06	0
Azospira	0	0	0	0	0	0	0	0	0	0	0	0	0	0	0	0	0	0	0	0	0	0	0	0	0	0	0	0	9.41909e-05	0	0	0	0	0	0	0	0	0	0	0	0	0	0	0	0	0	0	0	0
Otu1118	0	0	0	0	0	0	0	0	0	0	0	0	0	0	0	0	0	0	0	0	0	0	0	0	0	0	0	0	9.41909e-05	0	0	0	0	0	0	0	0	0	0	0	0	0	0	0	0	0	0	0	0
unclassified	0	0	0	4.64074e-06	0	0	0	1.38674e-05	0	4.73115e-06	4.88632e-06	0	0	0	0	4.45458e-06	0	5.0804e-06	0	0	0	0	0	0	0	4.67347e-06	0	0	0.000237956	0	0	0	0	0	0	4.54779e-06	0	0	2.53447e-05	4.77952e-06	9.9955e-06	9.15076e-06	4.84623e-06	1.42333e-05	0	5.02828e-06	0	4.66057e-06	0
Otu1042	0	0	0	0	0	0	0	0	0	0	0	0	0	0	0	0	0	0	0	0	0	0	0	0	0	0	0	0	0.000188382	0	0	0	0	0	0	0	0	0	0	0	0	0	0	0	0	0	0	0	0
Otu1043	0	0	0	0	0	0	0	0	0	0	0	0	0	0	0	0	0	0	0	0	0	0	0	0	0	0	0	0	4.95742e-06	0	0	0	0	0	0	0	0	0	0	0	0	4.57538e-06	0	4.74442e-06	0	0	0	0	0
Otu1129	0	0	0	0	0	0	0	0	0	4.73115e-06	0	0	0	0	0	0	0	5.0804e-06	0	0	0	0	0	0	0	0	0	0	1.98297e-05	0	0	0	0	0	0	0	0	0	0	4.77952e-06	0	0	0	0	0	0	0	0	0
Otu12978	0	0	0	0	0	0	0	0	0	0	0	0	0	0	0	0	0	0	0	0	0	0	0	0	0	0	0	0	1.98297e-05	0	0	0	0	0	0	0	0	0	0	0	0	0	0	0	0	0	0	0	0
Otu1832	0	0	0	4.64074e-06	0	0	0	1.38674e-05	0	0	4.88632e-06	0	0	0	0	4.45458e-06	0	0	0	0	0	0	0	0	0	4.67347e-06	0	0	4.95742e-06	0	0	0	0	0	0	4.54779e-06	0	0	2.53447e-05	0	9.9955e-06	4.57538e-06	4.84623e-06	9.48884e-06	0	5.02828e-06	0	4.66057e-06	0
unclassified	0	0	0	0	0	0	0	0.000110939	1.39903e-05	0	0	4.3351e-06	4.62366e-06	0	0	0	0	0	4.333e-06	0	0	0	0	0	0	0	0	0	0.000163595	0	4.96542e-06	0	0	0	0	0	0	0	0	0	0	0	0	3.79553e-05	0	0	0	0	0
unclassified	0	0	0	0	0	0	0	0.000110939	1.39903e-05	0	0	4.3351e-06	4.62366e-06	0	0	0	0	0	4.333e-06	0	0	0	0	0	0	0	0	0	0.000163595	0	4.96542e-06	0	0	0	0	0	0	0	0	0	0	0	0	3.79553e-05	0	0	0	0	0
unclassified	0	0	0	0	0	0	0	0.000110939	1.39903e-05	0	0	4.3351e-06	4.62366e-06	0	0	0	0	0	4.333e-06	0	0	0	0	0	0	0	0	0	0.000163595	0	4.96542e-06	0	0	0	0	0	0	0	0	0	0	0	0	3.79553e-05	0	0	0	0	0
Otu1053	0	0	0	0	0	0	0	3.23572e-05	0	0	0	0	0	0	0	0	0	0	4.333e-06	0	0	0	0	0	0	0	0	0	4.95742e-06	0	0	0	0	0	0	0	0	0	0	0	0	0	0	0	0	0	0	0	0
Otu1072	0	0	0	0	0	0	0	0	0	0	0	0	4.62366e-06	0	0	0	0	0	0	0	0	0	0	0	0	0	0	0	0	0	0	0	0	0	0	0	0	0	0	0	0	0	0	0	0	0	0	0	0
Otu1084	0	0	0	0	0	0	0	0	0	0	0	0	0	0	0	0	0	0	0	0	0	0	0	0	0	0	0	0	4.46167e-05	0	4.96542e-06	0	0	0	0	0	0	0	0	0	0	0	0	0	0	0	0	0	0
Otu1092	0	0	0	0	0	0	0	2.31123e-05	0	0	0	4.3351e-06	0	0	0	0	0	0	0	0	0	0	0	0	0	0	0	0	1.98297e-05	0	0	0	0	0	0	0	0	0	0	0	0	0	0	0	0	0	0	0	0
Otu1102	0	0	0	0	0	0	0	0	1.39903e-05	0	0	0	0	0	0	0	0	0	0	0	0	0	0	0	0	0	0	0	1.48722e-05	0	0	0	0	0	0	0	0	0	0	0	0	0	0	3.79553e-05	0	0	0	0	0
Otu1152	0	0	0	0	0	0	0	0	0	0	0	0	0	0	0	0	0	0	0	0	0	0	0	0	0	0	0	0	7.93187e-05	0	0	0	0	0	0	0	0	0	0	0	0	0	0	0	0	0	0	0	0
Otu14090	0	0	0	0	0	0	0	5.54695e-05	0	0	0	0	0	0	0	0	0	0	0	0	0	0	0	0	0	0	0	0	0	0	0	0	0	0	0	0	0	0	0	0	0	0	0	0	0	0	0	0	0
Deltaproteobacteria	0	0	0	1.39222e-05	0	0	0	0.000110939	0	9.4623e-06	0	8.67021e-06	9.24731e-06	4.6243e-06	0	0	4.61072e-06	0	0	0	0	1.37364e-05	0	0	0	0	0	4.95317e-06	0.00189373	4.8144e-06	4.96542e-06	4.78085e-06	0	0	1.01717e-05	1.36434e-05	0	0	8.1103e-05	0	4.99775e-06	9.15076e-06	9.69246e-06	9.48884e-06	0	1.50849e-05	0	5.59268e-05	4.74989e-06
Desulfobacterales	0	0	0	0	0	0	0	0	0	9.4623e-06	0	8.67021e-06	0	4.6243e-06	0	0	0	0	0	0	0	9.15759e-06	0	0	0	0	0	4.95317e-06	0.00030736	0	0	0	0	0	5.08585e-06	0	0	0	3.54826e-05	0	4.99775e-06	0	4.84623e-06	0	0	0	0	0	0
Desulfobacteraceae	0	0	0	0	0	0	0	0	0	0	0	0	0	0	0	0	0	0	0	0	0	0	0	0	0	0	0	0	7.93187e-05	0	0	0	0	0	0	0	0	0	2.53447e-05	0	0	0	0	0	0	0	0	0	0
unclassified	0	0	0	0	0	0	0	0	0	0	0	0	0	0	0	0	0	0	0	0	0	0	0	0	0	0	0	0	7.93187e-05	0	0	0	0	0	0	0	0	0	2.53447e-05	0	0	0	0	0	0	0	0	0	0
Otu287	0	0	0	0	0	0	0	0	0	0	0	0	0	0	0	0	0	0	0	0	0	0	0	0	0	0	0	0	0	0	0	0	0	0	0	0	0	0	5.06894e-06	0	0	0	0	0	0	0	0	0	0
Otu302	0	0	0	0	0	0	0	0	0	0	0	0	0	0	0	0	0	0	0	0	0	0	0	0	0	0	0	0	0	0	0	0	0	0	0	0	0	0	0	0	0	0	0	0	0	0	0	0	0
Otu36273	0	0	0	0	0	0	0	0	0	0	0	0	0	0	0	0	0	0	0	0	0	0	0	0	0	0	0	0	4.95742e-06	0	0	0	0	0	0	0	0	0	2.02758e-05	0	0	0	0	0	0	0	0	0	0
Otu371	0	0	0	0	0	0	0	0	0	0	0	0	0	0	0	0	0	0	0	0	0	0	0	0	0	0	0	0	7.43612e-05	0	0	0	0	0	0	0	0	0	0	0	0	0	0	0	0	0	0	0	0
Otu609	0	0	0	0	0	0	0	0	0	0	0	0	0	0	0	0	0	0	0	0	0	0	0	0	0	0	0	0	0	0	0	0	0	0	0	0	0	0	0	0	0	0	0	0	0	0	0	0	0
Desulfobulbaceae	0	0	0	0	0	0	0	0	0	9.4623e-06	0	8.67021e-06	0	4.6243e-06	0	0	0	0	0	0	0	9.15759e-06	0	0	0	0	0	4.95317e-06	0.000228041	0	0	0	0	0	5.08585e-06	0	0	0	1.01379e-05	0	4.99775e-06	0	4.84623e-06	0	0	0	0	0	0
Desulfobulbus	0	0	0	0	0	0	0	0	0	9.4623e-06	0	0	0	0	0	0	0	0	0	0	0	0	0	0	0	0	0	4.95317e-06	0.000228041	0	0	0	0	0	0	0	0	0	5.06894e-06	0	0	0	0	0	0	0	0	0	0
Otu126	0	0	0	0	0	0	0	0	0	9.4623e-06	0	0	0	0	0	0	0	0	0	0	0	0	0	0	0	0	0	4.95317e-06	0.000228041	0	0	0	0	0	0	0	0	0	0	0	0	0	0	0	0	0	0	0	0
Otu320	0	0	0	0	0	0	0	0	0	0	0	0	0	0	0	0	0	0	0	0	0	0	0	0	0	0	0	0	0	0	0	0	0	0	0	0	0	0	5.06894e-06	0	0	0	0	0	0	0	0	0	0
Desulfopila	0	0	0	0	0	0	0	0	0	0	0	8.67021e-06	0	4.6243e-06	0	0	0	0	0	0	0	9.15759e-06	0	0	0	0	0	0	0	0	0	0	0	0	5.08585e-06	0	0	0	5.06894e-06	0	4.99775e-06	0	4.84623e-06	0	0	0	0	0	0
Otu230	0	0	0	0	0	0	0	0	0	0	0	8.67021e-06	0	0	0	0	0	0	0	0	0	9.15759e-06	0	0	0	0	0	0	0	0	0	0	0	0	5.08585e-06	0	0	0	5.06894e-06	0	0	0	4.84623e-06	0	0	0	0	0	0
Otu465	0	0	0	0	0	0	0	0	0	0	0	0	0	4.6243e-06	0	0	0	0	0	0	0	0	0	0	0	0	0	0	0	0	0	0	0	0	0	0	0	0	0	0	4.99775e-06	0	0	0	0	0	0	0	0
unclassified	0	0	0	0	0	0	0	0	0	0	0	0	0	0	0	0	0	0	0	0	0	0	0	0	0	0	0	0	0	0	0	0	0	0	0	0	0	0	0	0	0	0	0	0	0	0	0	0	0
Otu251	0	0	0	0	0	0	0	0	0	0	0	0	0	0	0	0	0	0	0	0	0	0	0	0	0	0	0	0	0	0	0	0	0	0	0	0	0	0	0	0	0	0	0	0	0	0	0	0	0
Desulfovibrionales	0	0	0	4.64074e-06	0	0	0	0	0	0	0	0	4.62366e-06	0	0	0	0	0	0	0	0	0	0	0	0	0	0	0	0.00112533	0	4.96542e-06	4.78085e-06	0	0	5.08585e-06	1.36434e-05	0	0	3.54826e-05	0	0	9.15076e-06	4.84623e-06	0	0	0	0	5.59268e-05	0
Desulfomicrobiaceae	0	0	0	4.64074e-06	0	0	0	0	0	0	0	0	4.62366e-06	0	0	0	0	0	0	0	0	0	0	0	0	0	0	0	0.000941909	0	4.96542e-06	0	0	0	5.08585e-06	0	0	0	0	0	0	9.15076e-06	4.84623e-06	0	0	0	0	0	0
Desulfomicrobium	0	0	0	4.64074e-06	0	0	0	0	0	0	0	0	4.62366e-06	0	0	0	0	0	0	0	0	0	0	0	0	0	0	0	0.000941909	0	4.96542e-06	0	0	0	5.08585e-06	0	0	0	0	0	0	9.15076e-06	4.84623e-06	0	0	0	0	0	0
Otu228	0	0	0	0	0	0	0	0	0	0	0	0	4.62366e-06	0	0	0	0	0	0	0	0	0	0	0	0	0	0	0	0.00072874	0	0	0	0	0	0	0	0	0	0	0	0	0	0	0	0	0	0	0	0
Otu234	0	0	0	4.64074e-06	0	0	0	0	0	0	0	0	0	0	0	0	0	0	0	0	0	0	0	0	0	0	0	0	0.000213169	0	4.96542e-06	0	0	0	5.08585e-06	0	0	0	0	0	0	9.15076e-06	4.84623e-06	0	0	0	0	0	0
Desulfovibrionaceae	0	0	0	0	0	0	0	0	0	0	0	0	0	0	0	0	0	0	0	0	0	0	0	0	0	0	0	0	0.000183424	0	0	4.78085e-06	0	0	0	1.36434e-05	0	0	3.54826e-05	0	0	0	0	0	0	0	0	5.59268e-05	0
Desulfovibrio	0	0	0	0	0	0	0	0	0	0	0	0	0	0	0	0	0	0	0	0	0	0	0	0	0	0	0	0	0.000178467	0	0	0	0	0	0	0	0	0	0	0	0	0	0	0	0	0	0	0	0
Otu14050	0	0	0	0	0	0	0	0	0	0	0	0	0	0	0	0	0	0	0	0	0	0	0	0	0	0	0	0	6.94038e-05	0	0	0	0	0	0	0	0	0	0	0	0	0	0	0	0	0	0	0	0
Otu238	0	0	0	0	0	0	0	0	0	0	0	0	0	0	0	0	0	0	0	0	0	0	0	0	0	0	0	0	0.000109063	0	0	0	0	0	0	0	0	0	0	0	0	0	0	0	0	0	0	0	0
unclassified	0	0	0	0	0	0	0	0	0	0	0	0	0	0	0	0	0	0	0	0	0	0	0	0	0	0	0	0	4.95742e-06	0	0	4.78085e-06	0	0	0	1.36434e-05	0	0	3.54826e-05	0	0	0	0	0	0	0	0	5.59268e-05	0
Otu981	0	0	0	0	0	0	0	0	0	0	0	0	0	0	0	0	0	0	0	0	0	0	0	0	0	0	0	0	4.95742e-06	0	0	4.78085e-06	0	0	0	1.36434e-05	0	0	3.54826e-05	0	0	0	0	0	0	0	0	5.59268e-05	0
Desulfuromonadales	0	0	0	0	0	0	0	0	0	0	0	0	0	0	0	0	0	0	0	0	0	0	0	0	0	0	0	0	9.41909e-05	0	0	0	0	0	0	0	0	0	1.01379e-05	0	0	0	0	0	0	0	0	0	0
Desulfuromonadaceae	0	0	0	0	0	0	0	0	0	0	0	0	0	0	0	0	0	0	0	0	0	0	0	0	0	0	0	0	9.41909e-05	0	0	0	0	0	0	0	0	0	1.01379e-05	0	0	0	0	0	0	0	0	0	0
Desulfuromonas	0	0	0	0	0	0	0	0	0	0	0	0	0	0	0	0	0	0	0	0	0	0	0	0	0	0	0	0	0	0	0	0	0	0	0	0	0	0	0	0	0	0	0	0	0	0	0	0	0
Otu1048	0	0	0	0	0	0	0	0	0	0	0	0	0	0	0	0	0	0	0	0	0	0	0	0	0	0	0	0	0	0	0	0	0	0	0	0	0	0	0	0	0	0	0	0	0	0	0	0	0
Desulfuromusa	0	0	0	0	0	0	0	0	0	0	0	0	0	0	0	0	0	0	0	0	0	0	0	0	0	0	0	0	0	0	0	0	0	0	0	0	0	0	0	0	0	0	0	0	0	0	0	0	0
Otu222130	0	0	0	0	0	0	0	0	0	0	0	0	0	0	0	0	0	0	0	0	0	0	0	0	0	0	0	0	0	0	0	0	0	0	0	0	0	0	0	0	0	0	0	0	0	0	0	0	0
Pelobacter	0	0	0	0	0	0	0	0	0	0	0	0	0	0	0	0	0	0	0	0	0	0	0	0	0	0	0	0	9.41909e-05	0	0	0	0	0	0	0	0	0	1.01379e-05	0	0	0	0	0	0	0	0	0	0
Otu233	0	0	0	0	0	0	0	0	0	0	0	0	0	0	0	0	0	0	0	0	0	0	0	0	0	0	0	0	0	0	0	0	0	0	0	0	0	0	1.01379e-05	0	0	0	0	0	0	0	0	0	0
Otu270	0	0	0	0	0	0	0	0	0	0	0	0	0	0	0	0	0	0	0	0	0	0	0	0	0	0	0	0	9.41909e-05	0	0	0	0	0	0	0	0	0	0	0	0	0	0	0	0	0	0	0	0
Myxococcales	0	0	0	0	0	0	0	0	0	0	0	0	0	0	0	0	4.61072e-06	0	0	0	0	4.5788e-06	0	0	0	0	0	0	1.48722e-05	4.8144e-06	0	0	0	0	0	0	0	0	0	0	0	0	0	9.48884e-06	0	0	0	0	4.74989e-06
Sandaracinaceae	0	0	0	0	0	0	0	0	0	0	0	0	0	0	0	0	0	0	0	0	0	4.5788e-06	0	0	0	0	0	0	0	4.8144e-06	0	0	0	0	0	0	0	0	0	0	0	0	0	0	0	0	0	0	0
Sandaracinus	0	0	0	0	0	0	0	0	0	0	0	0	0	0	0	0	0	0	0	0	0	4.5788e-06	0	0	0	0	0	0	0	4.8144e-06	0	0	0	0	0	0	0	0	0	0	0	0	0	0	0	0	0	0	0
Otu246	0	0	0	0	0	0	0	0	0	0	0	0	0	0	0	0	0	0	0	0	0	4.5788e-06	0	0	0	0	0	0	0	4.8144e-06	0	0	0	0	0	0	0	0	0	0	0	0	0	0	0	0	0	0	0
unclassified	0	0	0	0	0	0	0	0	0	0	0	0	0	0	0	0	4.61072e-06	0	0	0	0	0	0	0	0	0	0	0	1.48722e-05	0	0	0	0	0	0	0	0	0	0	0	0	0	0	9.48884e-06	0	0	0	0	4.74989e-06
unclassified	0	0	0	0	0	0	0	0	0	0	0	0	0	0	0	0	4.61072e-06	0	0	0	0	0	0	0	0	0	0	0	1.48722e-05	0	0	0	0	0	0	0	0	0	0	0	0	0	0	9.48884e-06	0	0	0	0	4.74989e-06
Otu346	0	0	0	0	0	0	0	0	0	0	0	0	0	0	0	0	4.61072e-06	0	0	0	0	0	0	0	0	0	0	0	1.48722e-05	0	0	0	0	0	0	0	0	0	0	0	0	0	0	9.48884e-06	0	0	0	0	4.74989e-06
Syntrophobacterales	0	0	0	4.64074e-06	0	0	0	5.54695e-05	0	0	0	0	0	0	0	0	0	0	0	0	0	0	0	0	0	0	0	0	0	0	0	0	0	0	0	0	0	0	0	0	0	0	0	0	0	0	0	0	0
Syntrophaceae	0	0	0	4.64074e-06	0	0	0	5.54695e-05	0	0	0	0	0	0	0	0	0	0	0	0	0	0	0	0	0	0	0	0	0	0	0	0	0	0	0	0	0	0	0	0	0	0	0	0	0	0	0	0	0
unclassified	0	0	0	4.64074e-06	0	0	0	5.54695e-05	0	0	0	0	0	0	0	0	0	0	0	0	0	0	0	0	0	0	0	0	0	0	0	0	0	0	0	0	0	0	0	0	0	0	0	0	0	0	0	0	0
Otu531857	0	0	0	4.64074e-06	0	0	0	5.54695e-05	0	0	0	0	0	0	0	0	0	0	0	0	0	0	0	0	0	0	0	0	0	0	0	0	0	0	0	0	0	0	0	0	0	0	0	0	0	0	0	0	0
Syntrophobacteraceae	0	0	0	0	0	0	0	0	0	0	0	0	0	0	0	0	0	0	0	0	0	0	0	0	0	0	0	0	0	0	0	0	0	0	0	0	0	0	0	0	0	0	0	0	0	0	0	0	0
unclassified	0	0	0	0	0	0	0	0	0	0	0	0	0	0	0	0	0	0	0	0	0	0	0	0	0	0	0	0	0	0	0	0	0	0	0	0	0	0	0	0	0	0	0	0	0	0	0	0	0
Otu236	0	0	0	0	0	0	0	0	0	0	0	0	0	0	0	0	0	0	0	0	0	0	0	0	0	0	0	0	0	0	0	0	0	0	0	0	0	0	0	0	0	0	0	0	0	0	0	0	0
unclassified	0	0	0	4.64074e-06	0	0	0	5.54695e-05	0	0	0	0	4.62366e-06	0	0	0	0	0	0	0	0	0	0	0	0	0	0	0	0.000351977	0	0	0	0	0	0	0	0	0	0	0	0	0	0	0	0	1.50849e-05	0	0	0
unclassified	0	0	0	4.64074e-06	0	0	0	5.54695e-05	0	0	0	0	4.62366e-06	0	0	0	0	0	0	0	0	0	0	0	0	0	0	0	0.000351977	0	0	0	0	0	0	0	0	0	0	0	0	0	0	0	0	1.50849e-05	0	0	0
unclassified	0	0	0	4.64074e-06	0	0	0	5.54695e-05	0	0	0	0	4.62366e-06	0	0	0	0	0	0	0	0	0	0	0	0	0	0	0	0.000351977	0	0	0	0	0	0	0	0	0	0	0	0	0	0	0	0	1.50849e-05	0	0	0
Otu1035	0	0	0	0	0	0	0	0	0	0	0	0	0	0	0	0	0	0	0	0	0	0	0	0	0	0	0	0	0.000198297	0	0	0	0	0	0	0	0	0	0	0	0	0	0	0	0	0	0	0	0
Otu1056	0	0	0	0	0	0	0	5.54695e-05	0	0	0	0	0	0	0	0	0	0	0	0	0	0	0	0	0	0	0	0	0	0	0	0	0	0	0	0	0	0	0	0	0	0	0	0	0	0	0	0	0
Otu1200	0	0	0	0	0	0	0	0	0	0	0	0	0	0	0	0	0	0	0	0	0	0	0	0	0	0	0	0	5.9489e-05	0	0	0	0	0	0	0	0	0	0	0	0	0	0	0	0	0	0	0	0
Otu130	0	0	0	0	0	0	0	0	0	0	0	0	0	0	0	0	0	0	0	0	0	0	0	0	0	0	0	0	0	0	0	0	0	0	0	0	0	0	0	0	0	0	0	0	0	0	0	0	0
Otu249	0	0	0	0	0	0	0	0	0	0	0	0	4.62366e-06	0	0	0	0	0	0	0	0	0	0	0	0	0	0	0	8.92335e-05	0	0	0	0	0	0	0	0	0	0	0	0	0	0	0	0	1.50849e-05	0	0	0
Otu261	0	0	0	4.64074e-06	0	0	0	0	0	0	0	0	0	0	0	0	0	0	0	0	0	0	0	0	0	0	0	0	4.95742e-06	0	0	0	0	0	0	0	0	0	0	0	0	0	0	0	0	0	0	0	0
Epsilonproteobacteria	4.6318e-06	0	0	0	0	0	0	1.38674e-05	0	0	0	0	0	4.6243e-06	0	0	0	0	0	0	0	0	0	0	0	0	0	0	6.44464e-05	0	9.93083e-06	0	0	0	0	0	0	0	8.61719e-05	0	0	0	0	0	0	0	0	0	0
Campylobacterales	4.6318e-06	0	0	0	0	0	0	1.38674e-05	0	0	0	0	0	4.6243e-06	0	0	0	0	0	0	0	0	0	0	0	0	0	0	6.44464e-05	0	9.93083e-06	0	0	0	0	0	0	0	8.61719e-05	0	0	0	0	0	0	0	0	0	0
Helicobacteraceae	4.6318e-06	0	0	0	0	0	0	1.38674e-05	0	0	0	0	0	4.6243e-06	0	0	0	0	0	0	0	0	0	0	0	0	0	0	6.44464e-05	0	9.93083e-06	0	0	0	0	0	0	0	8.61719e-05	0	0	0	0	0	0	0	0	0	0
Helicobacter	0	0	0	0	0	0	0	0	0	0	0	0	0	0	0	0	0	0	0	0	0	0	0	0	0	0	0	0	4.95742e-06	0	0	0	0	0	0	0	0	0	1.01379e-05	0	0	0	0	0	0	0	0	0	0
Otu343490	0	0	0	0	0	0	0	0	0	0	0	0	0	0	0	0	0	0	0	0	0	0	0	0	0	0	0	0	4.95742e-06	0	0	0	0	0	0	0	0	0	1.01379e-05	0	0	0	0	0	0	0	0	0	0
Sulfurimonas	0	0	0	0	0	0	0	0	0	0	0	0	0	0	0	0	0	0	0	0	0	0	0	0	0	0	0	0	0	0	0	0	0	0	0	0	0	0	0	0	0	0	0	0	0	0	0	0	0
Otu343527	0	0	0	0	0	0	0	0	0	0	0	0	0	0	0	0	0	0	0	0	0	0	0	0	0	0	0	0	0	0	0	0	0	0	0	0	0	0	0	0	0	0	0	0	0	0	0	0	0
Sulfurovum	4.6318e-06	0	0	0	0	0	0	1.38674e-05	0	0	0	0	0	4.6243e-06	0	0	0	0	0	0	0	0	0	0	0	0	0	0	5.9489e-05	0	9.93083e-06	0	0	0	0	0	0	0	7.60341e-05	0	0	0	0	0	0	0	0	0	0
Otu343457	4.6318e-06	0	0	0	0	0	0	1.38674e-05	0	0	0	0	0	4.6243e-06	0	0	0	0	0	0	0	0	0	0	0	0	0	0	0	0	9.93083e-06	0	0	0	0	0	0	0	7.60341e-05	0	0	0	0	0	0	0	0	0	0
Otu343519	0	0	0	0	0	0	0	0	0	0	0	0	0	0	0	0	0	0	0	0	0	0	0	0	0	0	0	0	5.9489e-05	0	0	0	0	0	0	0	0	0	0	0	0	0	0	0	0	0	0	0	0
Gammaproteobacteria	0.619026	0.769118	0.83564	0.479541	0.74249	0.723275	0.574745	0.595627	0.72948	0.792449	0.509848	0.412719	0.333375	0.390966	0.46389	0.198964	0.614835	0.810674	0.322782	0.500087	0.715127	0.757823	0.543529	0.769369	0.64311	0.459355	0.69353	0.401425	0.398249	0.58663	0.414493	0.198161	0.661783	0.735795	0.722348	0.539686	0.880025	0.728452	0.653386	0.701892	0.5879	0.393863	0.415157	0.0621376	0.50382	0.357536	0.567729	0.516205	0.545017
Aeromonadales	0.000690138	8.71325e-05	0.000753048	6.49703e-05	0.00100224	0.00240102	0.001494	0.000342062	0.000629561	1.89246e-05	0.00160271	0.000325133	0.000208065	4.6243e-05	1.76892e-05	2.22729e-05	4.61072e-06	0	1.2999e-05	4.45012e-06	5.05094e-06	4.5788e-06	0	0	0	0	4.47852e-06	0	0.000332147	0.000269607	0.00933498	0.000138645	0.0267338	0.00186587	0.00107311	9.09558e-06	0.000838774	0.000798932	0.00095296	0.000573542	0.00138438	0.000626827	0.000392545	0.0152011	0.00048871	4.02263e-05	0.00060911	3.72846e-05	9.0248e-05
Aeromonadaceae	0.000690138	8.71325e-05	0.000753048	6.49703e-05	0.00100224	0.00240102	0.001494	0.000342062	0.000629561	1.89246e-05	0.00160271	0.000325133	0.000208065	4.6243e-05	1.76892e-05	2.22729e-05	4.61072e-06	0	1.2999e-05	4.45012e-06	5.05094e-06	4.5788e-06	0	0	0	0	4.47852e-06	0	0.000332147	0.000269607	0.00933498	0.000138645	0.0267338	0.00186587	0.00107311	9.09558e-06	0.000838774	0.000798932	0.00095296	0.000573542	0.00138438	0.000626827	0.000392545	0.0152011	0.00048871	4.02263e-05	0.00060911	3.72846e-05	9.0248e-05
Aeromonas	0.000690138	8.71325e-05	0.000753048	6.49703e-05	0.00100224	0.00240102	0.001494	0.000342062	0.000629561	1.89246e-05	0.00160271	0.000325133	0.000208065	4.6243e-05	1.76892e-05	2.22729e-05	4.61072e-06	0	1.2999e-05	4.45012e-06	5.05094e-06	4.5788e-06	0	0	0	0	4.47852e-06	0	0.000332147	0.000269607	0.00933498	0.000138645	0.0267338	0.00186587	0.00107311	9.09558e-06	0.000838774	0.000798932	0.00095296	0.000573542	0.00138438	0.000626827	0.000392545	0.0152011	0.00048871	4.02263e-05	0.00060911	3.72846e-05	9.0248e-05
Otu136913	0	0	0	0	0	0	0	0	0	0	0	0	0	0	0	0	0	0	0	0	0	0	0	0	0	0	0	0	0	0	0	0	0	0	0	0	0	0	0	0	0	0	0	5.21886e-05	0	0	0	0	0
Otu15176	0	0	0	0	0	0	0	0	0	0	0	0	0	0	0	0	0	0	0	0	0	0	0	0	0	0	0	0	0.000218126	0	4.96542e-06	0	0	0	5.08585e-06	0	0	4.96231e-06	0	0	0	0	0	0	4.48358e-06	0	0	0	0
Otu28	0.000690138	8.71325e-05	0.000748282	6.49703e-05	0.00100224	0.00240102	0.00148805	0.000309705	0.000624898	1.41935e-05	0.00156362	0.000325133	0.000208065	4.6243e-05	1.76892e-05	2.22729e-05	4.61072e-06	0	1.2999e-05	4.45012e-06	5.05094e-06	4.5788e-06	0	0	0	0	4.47852e-06	0	5.9489e-05	0.000269607	0.00923567	0.000138645	0.0267338	0.00186113	0.00102734	0	0.000838774	0.000789007	0.000831306	0.000573542	0.0013444	0.00047584	0.000392545	0.0130661	0.000479743	4.02263e-05	0.00060911	3.72846e-05	9.0248e-05
Otu444	0	0	4.76613e-06	0	0	0	0	0	0	4.73115e-06	9.77264e-06	0	0	0	0	0	0	0	0	0	0	0	0	0	0	0	0	0	5.45316e-05	0	2.97925e-05	0	0	4.7357e-06	3.05151e-05	9.09558e-06	0	0	0.000106448	0	9.9955e-06	0.000150988	0	1.89777e-05	4.48358e-06	0	0	0	0
Otu501765	0	0	0	0	0	0	0	0	0	0	0	0	0	0	0	0	0	0	0	0	0	0	0	0	0	0	0	0	0	0	0	0	0	0	0	0	0	0	0	0	0	0	0	0	0	0	0	0	0
Otu520633	0	0	0	0	0	0	0	0	0	0	0	0	0	0	0	0	0	0	0	0	0	0	0	0	0	0	0	0	0	0	0	0	0	0	0	0	0	0	0	0	0	0	0	0	0	0	0	0	0
Otu56361	0	0	0	0	0	0	0	0	0	0	0	0	0	0	0	0	0	0	0	0	0	0	0	0	0	0	0	0	0	0	0	0	0	0	0	0	0	0	0	0	0	0	0	0	0	0	0	0	0
Otu65571	0	0	0	0	0	0	0	0	0	0	9.77264e-06	0	0	0	0	0	0	0	0	0	0	0	0	0	0	0	0	0	0	0	5.9585e-05	0	0	0	1.01717e-05	0	0	0	0	0	0	0	0	0	0	0	0	0	0
Otu95480	0	0	0	0	0	0	0	0	0	0	0	0	0	0	0	0	0	0	0	0	0	0	0	0	0	0	0	0	0	0	0	0	0	0	0	0	0	0	0	0	0	0	0	0	0	0	0	0	0
Otu972	0	0	0	0	0	0	5.9522e-06	3.23572e-05	4.66342e-06	0	1.95453e-05	0	0	0	0	0	0	0	0	0	0	0	0	0	0	0	0	0	0	0	4.96542e-06	0	0	0	0	0	0	4.96231e-06	1.52068e-05	0	2.99865e-05	0	0	0.00206382	0	0	0	0	0
Alteromonadales	0.000125058	2.42035e-05	2.38306e-05	4.64074e-06	8.15223e-05	6.47578e-05	0.000166662	0.000258858	0.000172546	9.4623e-06	0.000136817	0.000459521	5.08602e-05	8.78617e-05	3.53783e-05	2.22729e-05	0	0	4.333e-06	4.45012e-06	0	2.74728e-05	4.93029e-06	4.59913e-05	0.00186008	7.47754e-05	4.47852e-06	0	8.92335e-05	0.00032738	0.0023834	0.000291632	1.42252e-05	0.0001326	0.00012206	1.36434e-05	5.55814e-05	1.98492e-05	0.000121655	0.000129047	0.000194912	0.000247071	0.000460392	0.000754362	0.000179343	8.54808e-05	7.67382e-05	0.000121175	0.000156747
Alteromonadaceae	0	9.68139e-06	0	0	0	0	0	1.84898e-05	0	0	0	0	0	0	0	0	0	0	0	0	0	2.2894e-05	0	0	0	4.67347e-06	0	0	0	0	0	0	0	0	5.08585e-06	0	0	0	0	4.77952e-06	0	0	0	0	4.48358e-06	0	0	0	0
Haliea	0	9.68139e-06	0	0	0	0	0	1.84898e-05	0	0	0	0	0	0	0	0	0	0	0	0	0	2.2894e-05	0	0	0	4.67347e-06	0	0	0	0	0	0	0	0	5.08585e-06	0	0	0	0	4.77952e-06	0	0	0	0	4.48358e-06	0	0	0	0
Otu1194	0	9.68139e-06	0	0	0	0	0	1.84898e-05	0	0	0	0	0	0	0	0	0	0	0	0	0	2.2894e-05	0	0	0	4.67347e-06	0	0	0	0	0	0	0	0	5.08585e-06	0	0	0	0	4.77952e-06	0	0	0	0	4.48358e-06	0	0	0	0
Shewanellaceae	0.000125058	1.45221e-05	2.38306e-05	4.64074e-06	8.15223e-05	6.47578e-05	0.000166662	0.000240368	0.000172546	9.4623e-06	0.000136817	0.000459521	5.08602e-05	8.78617e-05	3.53783e-05	2.22729e-05	0	0	4.333e-06	4.45012e-06	0	4.5788e-06	4.93029e-06	4.59913e-05	0.00186008	7.0102e-05	4.47852e-06	0	8.92335e-05	0.00032738	0.0023834	0.000291632	1.42252e-05	0.0001326	0.000116975	1.36434e-05	5.55814e-05	1.98492e-05	0.000121655	0.000124268	0.000194912	0.000247071	0.000460392	0.000754362	0.00017486	8.54808e-05	7.67382e-05	0.000121175	0.000156747
Shewanella	0.000125058	1.45221e-05	2.38306e-05	4.64074e-06	8.15223e-05	6.47578e-05	0.000166662	0.000240368	0.000172546	9.4623e-06	0.000136817	0.000459521	5.08602e-05	8.78617e-05	3.53783e-05	2.22729e-05	0	0	4.333e-06	4.45012e-06	0	4.5788e-06	4.93029e-06	4.59913e-05	0.00186008	7.0102e-05	4.47852e-06	0	8.92335e-05	0.00032738	0.0023834	0.000291632	1.42252e-05	0.0001326	0.000116975	1.36434e-05	5.55814e-05	1.98492e-05	0.000121655	0.000124268	0.000194912	0.000247071	0.000460392	0.000754362	0.00017486	8.54808e-05	7.67382e-05	0.000121175	0.000156747
Otu106	4.6318e-06	0	0	4.64074e-06	3.83634e-05	9.96274e-06	1.19044e-05	9.24492e-06	4.66342e-06	4.73115e-06	1.95453e-05	4.3351e-05	0	9.2486e-06	0	0	0	0	0	0	0	0	0	0	5.20634e-05	9.34693e-06	0	0	0	0.000250349	0.00200603	0.000210357	1.42252e-05	4.7357e-06	5.08585e-06	0	1.01057e-05	0	4.05515e-05	1.91181e-05	4.99775e-06	2.74523e-05	3.39236e-05	0	1.79343e-05	2.51414e-05	9.59228e-06	0	1.42497e-05
Otu14060	0	0	0	0	0	0	0	0	0	0	0	0	0	0	0	0	0	0	0	0	0	0	0	0	0	0	0	0	0	0	0	0	0	0	0	0	0	0	0	0	0	0	0	0	0	0	0	0	0
Otu206	0	0	0	0	0	0	0	0	1.86537e-05	0	4.88632e-06	0	4.62366e-06	4.6243e-06	0	4.45458e-06	0	0	0	0	0	0	0	0	0	0	0	0	0	6.25873e-05	0	6.69318e-05	0	0	1.01717e-05	0	5.05285e-06	0	0	4.77952e-06	0	0	4.84623e-06	0	4.48358e-06	5.02828e-06	0	0	0
Otu36300	0	0	0	0	0	0	0	0	0	0	0	0	0	0	0	0	0	0	0	0	0	0	0	0	0	0	0	0	0	0	0	0	0	0	0	0	0	0	0	0	0	0	0	0	0	0	0	0	0
Otu37415	0	0	0	0	0	0	0	0	0	0	0	0	0	0	0	0	0	0	0	0	0	0	0	0	0	0	0	0	0	0	0	0	0	0	0	0	0	0	0	0	0	0	0	0	0	0	0	0	0
Otu963	0.000101899	1.45221e-05	1.90645e-05	0	2.87726e-05	4.98137e-05	0.000101187	0.000226501	0.000149229	0	0.000112385	0.0004075	4.62366e-05	6.93645e-05	3.53783e-05	1.78183e-05	0	0	4.333e-06	4.45012e-06	0	0	0	4.59913e-05	0.00149564	5.60816e-05	4.47852e-06	0	8.92335e-05	9.62881e-06	0.000337648	1.43425e-05	0	0.000104185	8.64594e-05	1.36434e-05	4.04228e-05	1.98492e-05	8.1103e-05	9.08109e-05	0.000179919	0.000205892	0.000407083	0.000749618	0.000143475	5.53111e-05	6.7146e-05	0.000111854	0.000123497
Otu983	1.85272e-05	0	4.76613e-06	0	1.43863e-05	4.98137e-06	5.35698e-05	4.62246e-06	0	4.73115e-06	0	8.67021e-06	0	4.6243e-06	0	0	0	0	0	0	0	4.5788e-06	4.93029e-06	0	0.00031238	4.67347e-06	0	0	0	4.8144e-06	3.97233e-05	0	0	2.36785e-05	1.52575e-05	0	0	0	0	9.55904e-06	9.9955e-06	1.37261e-05	1.45387e-05	4.74442e-06	8.96716e-06	0	0	9.32114e-06	1.89996e-05
Chromatiales	0	0	0	0	0	0	0	5.54695e-05	0	0	0	0	4.62366e-06	0	0	0	4.61072e-06	0	0	0	0	1.37364e-05	0	0	0	0	0	3.96253e-05	1.48722e-05	4.8144e-06	0	0	0	0	0	0	0	0	1.52068e-05	4.77952e-06	0	0	0	0	4.48358e-06	5.02828e-06	0	9.32114e-06	0
Ectothiorhodospiraceae	0	0	0	0	0	0	0	0	0	0	0	0	0	0	0	0	0	0	0	0	0	4.5788e-06	0	0	0	0	0	1.98127e-05	0	0	0	0	0	0	0	0	0	0	5.06894e-06	0	0	0	0	0	0	0	0	0	0
Thiogranum	0	0	0	0	0	0	0	0	0	0	0	0	0	0	0	0	0	0	0	0	0	0	0	0	0	0	0	4.95317e-06	0	0	0	0	0	0	0	0	0	0	5.06894e-06	0	0	0	0	0	0	0	0	0	0
Otu14053	0	0	0	0	0	0	0	0	0	0	0	0	0	0	0	0	0	0	0	0	0	0	0	0	0	0	0	4.95317e-06	0	0	0	0	0	0	0	0	0	0	5.06894e-06	0	0	0	0	0	0	0	0	0	0
Thiohalomonas	0	0	0	0	0	0	0	0	0	0	0	0	0	0	0	0	0	0	0	0	0	0	0	0	0	0	0	0	0	0	0	0	0	0	0	0	0	0	0	0	0	0	0	0	0	0	0	0	0
Otu1032	0	0	0	0	0	0	0	0	0	0	0	0	0	0	0	0	0	0	0	0	0	0	0	0	0	0	0	0	0	0	0	0	0	0	0	0	0	0	0	0	0	0	0	0	0	0	0	0	0
unclassified	0	0	0	0	0	0	0	0	0	0	0	0	0	0	0	0	0	0	0	0	0	4.5788e-06	0	0	0	0	0	1.48595e-05	0	0	0	0	0	0	0	0	0	0	0	0	0	0	0	0	0	0	0	0	0
Otu1055	0	0	0	0	0	0	0	0	0	0	0	0	0	0	0	0	0	0	0	0	0	0	0	0	0	0	0	0	0	0	0	0	0	0	0	0	0	0	0	0	0	0	0	0	0	0	0	0	0
Otu349451	0	0	0	0	0	0	0	0	0	0	0	0	0	0	0	0	0	0	0	0	0	4.5788e-06	0	0	0	0	0	1.48595e-05	0	0	0	0	0	0	0	0	0	0	0	0	0	0	0	0	0	0	0	0	0
Thioalkalispiraceae	0	0	0	0	0	0	0	5.54695e-05	0	0	0	0	0	0	0	0	4.61072e-06	0	0	0	0	9.15759e-06	0	0	0	0	0	9.90634e-06	0	4.8144e-06	0	0	0	0	0	0	0	0	5.06894e-06	0	0	0	0	0	4.48358e-06	5.02828e-06	0	4.66057e-06	0
Thioprofundum	0	0	0	0	0	0	0	5.54695e-05	0	0	0	0	0	0	0	0	4.61072e-06	0	0	0	0	9.15759e-06	0	0	0	0	0	9.90634e-06	0	4.8144e-06	0	0	0	0	0	0	0	0	5.06894e-06	0	0	0	0	0	4.48358e-06	5.02828e-06	0	4.66057e-06	0
Otu1016	0	0	0	0	0	0	0	0	0	0	0	0	0	0	0	0	0	0	0	0	0	0	0	0	0	0	0	0	0	0	0	0	0	0	0	0	0	0	5.06894e-06	0	0	0	0	0	0	0	0	0	0
Otu1044	0	0	0	0	0	0	0	0	0	0	0	0	0	0	0	0	0	0	0	0	0	0	0	0	0	0	0	0	0	0	0	0	0	0	0	0	0	0	0	0	0	0	0	0	4.48358e-06	0	0	0	0
Otu1057	0	0	0	0	0	0	0	5.54695e-05	0	0	0	0	0	0	0	0	4.61072e-06	0	0	0	0	9.15759e-06	0	0	0	0	0	9.90634e-06	0	4.8144e-06	0	0	0	0	0	0	0	0	0	0	0	0	0	0	0	5.02828e-06	0	4.66057e-06	0
Otu14063	0	0	0	0	0	0	0	0	0	0	0	0	0	0	0	0	0	0	0	0	0	0	0	0	0	0	0	0	0	0	0	0	0	0	0	0	0	0	0	0	0	0	0	0	0	0	0	0	0
unclassified	0	0	0	0	0	0	0	0	0	0	0	0	0	0	0	0	0	0	0	0	0	0	0	0	0	0	0	0	0	0	0	0	0	0	0	0	0	0	0	0	0	0	0	0	0	0	0	0	0
Otu1650	0	0	0	0	0	0	0	0	0	0	0	0	0	0	0	0	0	0	0	0	0	0	0	0	0	0	0	0	0	0	0	0	0	0	0	0	0	0	0	0	0	0	0	0	0	0	0	0	0
unclassified	0	0	0	0	0	0	0	0	0	0	0	0	4.62366e-06	0	0	0	0	0	0	0	0	0	0	0	0	0	0	9.90634e-06	1.48722e-05	0	0	0	0	0	0	0	0	0	5.06894e-06	4.77952e-06	0	0	0	0	0	0	0	4.66057e-06	0
unclassified	0	0	0	0	0	0	0	0	0	0	0	0	4.62366e-06	0	0	0	0	0	0	0	0	0	0	0	0	0	0	9.90634e-06	1.48722e-05	0	0	0	0	0	0	0	0	0	5.06894e-06	4.77952e-06	0	0	0	0	0	0	0	4.66057e-06	0
Otu1140	0	0	0	0	0	0	0	0	0	0	0	0	0	0	0	0	0	0	0	0	0	0	0	0	0	0	0	0	0	0	0	0	0	0	0	0	0	0	0	0	0	0	0	0	0	0	0	0	0
Otu14042	0	0	0	0	0	0	0	0	0	0	0	0	4.62366e-06	0	0	0	0	0	0	0	0	0	0	0	0	0	0	0	1.48722e-05	0	0	0	0	0	0	0	0	0	0	4.77952e-06	0	0	0	0	0	0	0	0	0
Otu343899	0	0	0	0	0	0	0	0	0	0	0	0	0	0	0	0	0	0	0	0	0	0	0	0	0	0	0	0	0	0	0	0	0	0	0	0	0	0	5.06894e-06	0	0	0	0	0	0	0	0	0	0
Otu565	0	0	0	0	0	0	0	0	0	0	0	0	0	0	0	0	0	0	0	0	0	0	0	0	0	0	0	9.90634e-06	0	0	0	0	0	0	0	0	0	0	0	0	0	0	0	0	0	0	0	4.66057e-06	0
Enterobacteriales	0.617553	0.768581	0.834234	0.479226	0.741172	0.720406	0.571078	0.592636	0.727516	0.792061	0.506213	0.410981	0.331623	0.390258	0.463187	0.197877	0.614286	0.800996	0.322618	0.500029	0.715097	0.757095	0.54348	0.769246	0.641047	0.459056	0.69345	0.401276	0.394799	0.585879	0.402199	0.19513	0.634859	0.733461	0.717039	0.539436	0.87903	0.727381	0.651044	0.699927	0.584707	0.390683	0.413858	0.0409111	0.502542	0.356566	0.566458	0.515524	0.544613
Enterobacteriaceae	0.617553	0.768581	0.834234	0.479226	0.741172	0.720406	0.571078	0.592636	0.727516	0.792061	0.506213	0.410981	0.331623	0.390258	0.463187	0.197877	0.614286	0.800996	0.322618	0.500029	0.715097	0.757095	0.54348	0.769246	0.641047	0.459056	0.69345	0.401276	0.394799	0.585879	0.402199	0.19513	0.634859	0.733461	0.717039	0.539436	0.87903	0.727381	0.651044	0.699927	0.584707	0.390683	0.413858	0.0409111	0.502542	0.356566	0.566458	0.515524	0.544613
Biostraticola	0	0	0	0	0	0	0	0	0	0	0	0	0	0	4.42229e-06	0	0	0.000609648	0	0	5.05094e-06	0	0	0	0	0	0	0	0	0	0	0	0	0	0	0	0	0	0	0	4.99775e-06	0	0	0	0	0	0	0	2.84994e-05
Otu497	0	0	0	0	0	0	0	0	0	0	0	0	0	0	4.42229e-06	0	0	0.000609648	0	0	5.05094e-06	0	0	0	0	0	0	0	0	0	0	0	0	0	0	0	0	0	0	0	4.99775e-06	0	0	0	0	0	0	0	2.84994e-05
Budvicia	0	0	0	0	0	0	0	0	0	0	0	0	0	0	0	0	0	0	0	0	0	0	0	0	0	0	0	0	0	0	0	0	0	0	0	0	0	0	0	0	0	0	0	0	0	0	0	0	0
Otu207282	0	0	0	0	0	0	0	0	0	0	0	0	0	0	0	0	0	0	0	0	0	0	0	0	0	0	0	0	0	0	0	0	0	0	0	0	0	0	0	0	0	0	0	0	0	0	0	0	0
Otu492183	0	0	0	0	0	0	0	0	0	0	0	0	0	0	0	0	0	0	0	0	0	0	0	0	0	0	0	0	0	0	0	0	0	0	0	0	0	0	0	0	0	0	0	0	0	0	0	0	0
Otu517012	0	0	0	0	0	0	0	0	0	0	0	0	0	0	0	0	0	0	0	0	0	0	0	0	0	0	0	0	0	0	0	0	0	0	0	0	0	0	0	0	0	0	0	0	0	0	0	0	0
Buttiauxella	0.00337658	0.00139412	0.00369851	0.000334133	0.00980185	0.087961	0.0134341	0.00602307	0.0135286	0.00890876	0.000928401	0.0188794	0.00249677	0.0115422	0.036024	0.00249457	0.00906928	0.021866	0.00695446	0.00703564	0.000282853	5.49456e-05	0.00201649	0.00235578	0.072051	0.00606148	0.00501147	0.000292237	0.00622651	0.000548842	0.00441425	0.015466	0.00044098	0.0100302	0.00656583	0.000404753	0.0086808	0.00123065	0.0126419	0.00280558	0.00307861	0.00242953	0.00543747	0.000355831	0.0199475	0.0059384	0.00208152	0.00834242	0.00510614
Otu1000	0.000768878	0.000130699	0.000176347	6.96111e-05	0.000949495	0.0391436	0.00286896	0.000989207	0.00118451	0.00120644	1.95453e-05	0.000151729	0.000924731	0.00177573	0.00238804	4.45458e-05	0.00130483	0.00216933	2.5998e-05	0.00103243	1.01019e-05	0	0.00017256	0.000189076	0.000828281	4.67347e-06	0.000183619	4.45785e-05	0.000674209	0	1.98617e-05	0.000344221	4.74172e-06	0.000487777	0.000940882	7.73124e-05	0.00161186	4.96231e-06	0.000674169	2.86771e-05	0.0004448	7.77815e-05	0.000615471	0	0.000946036	0.000437461	1.43884e-05	0.000321579	0.000417991
Otu10057	0	0	0	0	0	0	0	0	0	0	0	1.30053e-05	0	0	0	0	0	0	0	0	0	0	0	0	0	0	0	0	0	0	4.96542e-06	6.69318e-05	0	0	0	0	0	0	1.01379e-05	0	0	0	0	0	4.48358e-06	0	0	1.86423e-05	0
Otu1008	4.6318e-06	0	0	0	9.11131e-05	1.99255e-05	0	4.62246e-06	0	1.41935e-05	0	0.000177739	9.24731e-06	0	2.21115e-05	0	5.99393e-05	0.0002591	8.666e-06	2.22506e-05	0	0	0	0	0	0.000210306	0	0	0.000128893	0	0.000640539	0.000411153	0	0.000213107	7.12019e-05	0	5.05285e-06	0	0.000177413	2.86771e-05	1.49933e-05	9.15076e-06	1.45387e-05	0	0.000116573	0	9.59228e-06	7.45691e-05	3.79992e-05
Otu101966	0	0	0	0	0	7.47205e-05	0	0	0	0	0	0	0	0	0	0	0	0	0	0	0	0	0	0	0	0	0	0	0	0	0	0	4.74172e-06	0	0	0	0	0	0	0	0	0	0	0	0	0	0	0	0
Otu10198	0	0	9.53225e-06	0	0	9.96274e-06	5.9522e-06	0	0	0.00016559	0	4.3351e-06	0.000129462	0	0	0	4.61072e-06	0	0	0	0	0	0	0	0	4.67347e-06	0	0	0	0	0	0	0	0	0	0	3.537e-05	1.48869e-05	5.06894e-06	0	0	0	0	0	0	0	4.79614e-06	9.32114e-06	0
Otu1029	0	0	0	0	0	0	0	0	0	0	0	0	0	0	0	0	0	5.0804e-06	0	0.000129054	0	0	0	0	0	0	0	0	0	0	0	0.000124302	0	7.10355e-05	1.01717e-05	0	0	0	0	0	0	0	0	0	0	0	0	0	0
Otu10383	0	0	0	0	0	0	0	0	0	0	0	4.3351e-06	0	0	0	0	0	0	0	0	0	0	0	0	0	0	0	0	0	0	0	0	0	0	0	0	5.05285e-06	0	0	0	0	0	0	0	0	0	0	0	0
Otu10394	0	0	0	0	0	6.47578e-05	0	0	0	0	0	0	0	0	0	0	0	0	4.333e-06	0	0	0	0	0	9.46607e-06	0	0	0	0	0	0	0	0	4.7357e-06	0	0	0	0	5.06894e-06	4.77952e-06	0	0	0	0	0	0	0	0	0
Otu104897	0	0	0	0	0	0	0	0	0	0	0.000127044	0	0	0	0	0	0	0	0	0	0	0	0	0	0	0	0	0	0	0	0	0	0	0	0	0	0	0	0	0	0	0	0	0	0	0	0	0	0
Otu1081	0	0	4.76613e-06	0	0.000148658	1.49441e-05	0	0	1.39903e-05	6.62361e-05	0	1.73404e-05	0	4.6243e-05	4.86452e-05	0	0	0.000345467	0	8.90024e-06	0	0	0	0	0.000184588	0	7.16563e-05	0	2.97445e-05	0	0	0	0	3.78856e-05	0	0	5.05285e-05	0	0	4.77952e-06	0	0	0	0	3.58686e-05	0	0	9.32114e-06	0
Otu1097	1.85272e-05	0	3.8129e-05	0	0.000110295	1.49441e-05	2.9761e-05	1.38674e-05	1.86537e-05	0.000175053	9.77264e-06	6.06914e-05	3.23656e-05	6.01159e-05	0.000238804	2.67275e-05	9.22143e-06	7.11256e-05	0	0.000137954	0	0	2.46514e-05	0	8.51946e-05	9.34693e-06	4.47852e-06	0	0	0	4.96542e-06	1.43425e-05	0	6.62998e-05	3.05151e-05	0	0.000768034	0	0.000177413	9.55904e-06	1.49933e-05	1.37261e-05	1.93849e-05	0	4.48358e-05	0	0	0.000181762	5.22488e-05
Otu1117	0	0	0	0	0	0.00440353	0	0	0	0	0	0.000164734	0	0	0	0	0	0	0	0	0	0	0	0	0	1.86939e-05	0	0	4.95742e-06	0	4.96542e-05	0	0	0	0	0	0	0	0	0	0	4.57538e-06	0	0	4.48358e-06	0	0	0	9.49979e-06
Otu11199	0	0	0	0	0	0	0	0	0	9.4623e-06	0	0	0	0	0	0	0	0	4.333e-06	0	0	0	0	0	0	0	0	0	0	0	0	0	0	0	0	0	5.05285e-06	0	0	0	0	0	0	0	0	0	0	0	0
Otu11246	4.6318e-06	0	0	0	0	0	0	3.69797e-05	0	3.78492e-05	0	0	0	0	4.42229e-06	0	0	0	0	0	0	0	0	0	1.89321e-05	0	0	0	0	0	0	0	0	0	5.08585e-06	0	3.537e-05	0	0	0	0	4.57538e-06	0	0	4.48358e-06	0	0	0	0
Otu1136	0	0.000121017	0	0	4.79543e-06	4.98137e-06	0	9.24492e-06	9.32684e-06	0	9.77264e-06	1.30053e-05	0	0	0	4.45458e-06	0	1.52412e-05	0.000138656	1.78005e-05	0	0	0	0	4.73303e-06	9.34693e-06	0	0	0	0	3.97233e-05	0.000176891	0	9.4714e-06	0	5.45735e-05	0	0	0	0	9.9955e-06	0	0	0	0	0	0	0	0
Otu1138	0	0	4.76613e-06	0	0.000100704	6.47578e-05	5.35698e-05	1.38674e-05	4.66342e-06	1.89246e-05	0	0	0	4.6243e-06	0.000260915	4.45458e-06	4.61072e-06	0.000548683	2.1665e-05	4.45012e-06	2.02038e-05	0	4.93029e-06	5.11015e-06	7.57285e-05	0	0	0	0	0	0	0	0	9.4714e-06	1.52575e-05	0	2.52643e-05	4.96231e-06	2.53447e-05	1.43386e-05	0	0	4.84623e-06	0	2.24179e-05	2.01131e-05	0	9.32114e-06	9.49979e-06
Otu1153	9.26359e-06	0	9.53225e-06	0	0.000172635	0.000313826	0.00010714	7.85818e-05	6.06244e-05	0.000274407	0	6.50266e-05	0	4.6243e-06	0.000110557	0	1.38322e-05	0.00076206	4.333e-06	0.000547365	0	0	4.93029e-06	0	4.73303e-05	9.34693e-06	0	0	4.95742e-06	0	1.48962e-05	9.56169e-06	0	2.36785e-05	7.12019e-05	9.09558e-06	0.000101057	0	8.1103e-05	3.82362e-05	9.9955e-06	2.74523e-05	0.000344082	0	0.000255564	3.5198e-05	0	8.85508e-05	4.74989e-06
Otu11603	0	0	0	0	1.91817e-05	4.98137e-06	0	0	0	0	0	0	0	0.00427285	0	0	0	0	0	0	0	0	0	0	0	0	0	0	0	0	0	0	0	0	0	0	0	0	1.52068e-05	0	0	4.57538e-06	0	0	0	0	0	0	0
Otu1167	0	0	4.76613e-06	4.64074e-06	4.79543e-06	4.98137e-06	5.9522e-06	0	0	1.89246e-05	9.77264e-06	4.3351e-06	0	0.000235839	0	4.45458e-06	0	5.0804e-06	0	0	0	0	0	0	9.46607e-06	0	0	0	0	0	6.45504e-05	1.91234e-05	0	9.4714e-06	0	0	0	0	0	4.77952e-06	0	4.57538e-05	9.69246e-06	0	4.48358e-06	5.02828e-06	0	4.66057e-06	0
Otu11912	0	0	0	0	1.43863e-05	1.49441e-05	0	0	0	0	0	4.3351e-06	0	0	0	0	0	0	0	0	0	0	0	0	0	0	0	0	0	0	9.93083e-06	0	0	0	0	0	1.51586e-05	0	0	0	4.99775e-06	0	0	0	0	0	4.79614e-06	0	0
Otu12024	0	4.84069e-06	0	0	0	4.98137e-06	0	0	0	0	0	0	0	0	0	0	0	0	0	0	0	0	0	5.11015e-06	0	0	0	0	0	0	0	0	0	0	0	0	0	0	0	0	0	0	0	0	0	0	0	0	0
Otu120543	0	2.42035e-05	4.76613e-06	0	0	4.98137e-06	1.19044e-05	4.62246e-06	0	4.73115e-06	0	0	0	0	5.30675e-05	0	0	0	0	0	0	0	0	0	1.41991e-05	0	0	0	0	0	0	0	0	0	5.08585e-06	0	5.05285e-06	0	0	1.91181e-05	4.99775e-06	4.57538e-06	0	0	4.48358e-06	5.02828e-06	0	9.32114e-06	0
Otu1211	4.6318e-06	0	0	0	2.39771e-05	3.48696e-05	1.78566e-05	9.24492e-06	3.26439e-05	1.89246e-05	0	4.3351e-06	0	9.2486e-05	8.84459e-06	0	1.38322e-05	5.0804e-06	4.333e-06	0	0	0	0	0	0	0	0	0	1.48722e-05	0	1.48962e-05	4.78085e-06	0	4.7357e-06	0	0	1.51586e-05	4.96231e-06	5.06894e-06	0	0	0	0	0	8.96716e-06	1.50849e-05	0	2.79634e-05	0
Otu1226	0	0	0	0	4.79543e-06	0	0	0	1.86537e-05	0	0	0	4.62366e-06	0	0	0	0	0	0	0	0	0	0	0	0	0	0	0	0	0	0	4.78085e-06	0	0	0	0	0	0	0	0	0	0	0	0	0	0	0	4.66057e-06	0
Otu123865	0	0	0	0	0	0	0	4.62246e-06	0	0	0	0	0	0	0	0	0	5.0804e-06	0	0	0	0	0	0	0	0	0	0	0	0	0	0	0	0	0	0	0	0	0	0	0	4.57538e-06	0	0	0	6.03394e-05	0	9.32114e-06	0
Otu12436	0	0	0	0	0	0	0	0	4.66342e-06	0	0	0	0	2.77458e-05	0.000300716	0	0	0	0	4.45012e-06	0	0	4.93029e-06	0	4.73303e-06	0	0	0	0	0	0	0	0	0	0	0	0	4.96231e-06	5.06894e-06	0	0	0	0	0	0	0	0	0	0
Otu12640	0	0	0	0	0	4.98137e-06	0	0	0	7.09673e-05	0	8.67021e-06	0	0	0	0	0	2.5402e-05	0	0	0	0	0	0	0	0	0	0	0	0	4.96542e-06	0	0	0	0	0	0	0	5.06894e-06	0	0	0	0	0	0	0	0	9.32114e-06	0
Otu12721	0	0	0	0	0	2.49068e-05	8.33309e-05	9.24492e-06	0	4.73115e-06	0	4.3351e-06	0	0	0.00015478	0	0	0	0	0	0	0	0	0	0	0	0	0	0	0	0	0	0	9.4714e-06	0.00014749	0	1.01057e-05	0	0	0	4.99775e-06	4.57538e-06	0	0	0	5.02828e-06	0	1.39817e-05	9.49979e-06
Otu12860	0	0	0	0	0	0	0	0	0	0	0	4.3351e-06	4.62366e-06	4.6243e-06	0	0	0	0	0	0	0	0	0	0	0	0	0	0	4.95742e-06	0	2.48271e-05	1.43425e-05	0	0	0	0	0	0	0	0	0	0	0	0	0	1.50849e-05	0	0	0
Otu13066	0	0	0	0	0	0.000293901	1.19044e-05	0.000157164	6.06244e-05	0	0	8.67021e-06	4.62366e-06	0	0.000137091	0	0.0001291	0	0	0	0	0	0	0	9.46607e-06	4.67347e-06	0	0	0	0	0	0	0	0	0	0	1.01057e-05	0	2.53447e-05	0	0	4.57538e-06	0	0	4.48358e-06	0	0	0	0
Otu130938	0	0	0	0	0	0	0	0	0	0	0	0	0	0	0	0	0	0	0	0	0	0	0	0	0	0	0	0	0	0	4.96542e-06	0	0	0	0	0	0	0	0	0	0	0	0	0	0	0	0	0	0
Otu1323	0	0	0	1.39222e-05	4.79543e-05	4.98137e-06	5.9522e-06	0	0.000116585	0	0	8.67021e-06	4.62366e-06	4.6243e-06	8.84459e-05	8.90916e-06	0	0	0	0	0	0	0	0	1.89321e-05	0	0	0	4.95742e-06	0	5.46196e-05	7.17127e-05	0	1.42071e-05	0	0	7.07399e-05	0	0	0	0	2.28769e-05	9.69246e-06	0	1.34507e-05	5.02828e-06	4.79614e-06	0	0
Otu1328	1.38954e-05	0	9.53225e-06	0	0	4.98137e-06	0	0	0	0	0	0	0	9.2486e-06	0	0	0	0	0	0	0	0	0	0	0	0	0	0	0	0	1.48962e-05	4.78085e-06	0	0	0	0	0	0	0	0	0	0	4.84623e-06	0	0	0	0	0	0
Otu1335	0	0	0	0	1.43863e-05	0	0	9.24492e-06	0	9.4623e-06	0	2.60106e-05	4.62366e-06	1.84972e-05	7.96013e-05	0	0	1.01608e-05	0	0	0	0	3.4512e-05	0	0	0	0	0	0	0	4.96542e-06	0	0	9.4714e-06	0	0	0	0	2.02758e-05	0	0	0	0	0	8.96716e-06	0	0	0	0
Otu13360	0	0	0	0	0	0	0.000363084	9.24492e-06	0	4.73115e-06	0	0	0	0	0	0	0	0	0	0	0	0	0	0	0	0	0	0	0	0	0	0	0	0	0	0	5.05285e-06	0	0	0	0	9.15076e-06	0	0	0	0	0	0	0
Otu136167	0	0	0	0	0	4.98137e-06	5.9522e-06	0	0	0	0	4.3351e-06	9.24731e-06	4.6243e-06	0	0	0	8.63668e-05	0	0	0	0	0	0	0	0	0	0	0	0	0	9.56169e-06	0	0	5.08585e-06	0	0	0	0	4.77952e-06	4.99775e-06	1.37261e-05	0	0	0	0	0	0	0
Otu136912	3.70544e-05	0	1.42984e-05	0	2.39771e-05	7.47205e-05	4.76176e-05	1.38674e-05	4.19708e-05	1.41935e-05	2.44316e-05	1.30053e-05	9.24731e-06	3.23701e-05	8.84459e-06	4.45458e-06	4.61072e-05	8.63668e-05	2.1665e-05	2.22506e-05	0	0	0	6.64319e-05	3.31312e-05	0.00012151	8.95704e-06	0	0	0	9.93083e-06	0	0	6.62998e-05	2.03434e-05	0	5.05285e-05	7.9397e-05	3.54826e-05	2.38976e-05	8.99595e-05	6.40553e-05	2.90774e-05	0	2.69015e-05	3.01697e-05	1.43884e-05	8.38903e-05	0
Otu137219	0	0	0	0	0	4.98137e-06	0	0	0	4.73115e-06	0	0	0	0	0	0	0	0	0	0	0	0	0	0	0	0	0	0	0	0	0	0	0.000151735	0	0	0	0	0	0	0	0	0	0	0	0	0	0	0	0
Otu137239	4.6318e-06	0	1.90645e-05	0	2.39771e-05	2.49068e-05	5.35698e-05	5.08471e-05	4.66342e-05	2.83869e-05	0	2.60106e-05	0	1.84972e-05	2.21115e-05	0	5.53286e-05	4.06432e-05	4.333e-06	4.45012e-06	0	0	4.93029e-06	1.02203e-05	2.36652e-05	9.34693e-06	4.47852e-06	0	0	0	4.96542e-06	4.78085e-06	0	3.31499e-05	1.52575e-05	0	3.03171e-05	4.96231e-06	2.02758e-05	0	4.49798e-05	1.37261e-05	4.84623e-06	0	4.48358e-06	2.01131e-05	1.43884e-05	1.86423e-05	4.74989e-06
Otu137985	1.38954e-05	0	4.76613e-06	0	1.91817e-05	3.48696e-05	5.9522e-06	0	4.66342e-06	1.89246e-05	0	0	0	0	4.42229e-06	0	0	1.52412e-05	0	8.90024e-06	5.05094e-06	0	0	1.02203e-05	1.41991e-05	0	0	0	0	0	4.96542e-06	0	0	9.4714e-06	0	0	3.03171e-05	4.96231e-06	0	4.77952e-06	4.49798e-05	2.28769e-05	0	0	0	0	0	1.39817e-05	0
Otu14025	0.00121816	0.000634131	0.000714919	1.39222e-05	0.000326089	0.000423416	0.000208327	0.00206162	0.000993308	0.000681286	0.000166135	0.0084838	0.000226559	0.00129943	0.00218904	0.000922098	0.00331049	0.000843346	0.00214483	0.000160204	5.05094e-06	9.15759e-06	6.40937e-05	4.08812e-05	0.0047141	0.00450989	0.000138834	0.000227846	0.00399568	2.88864e-05	0.00127611	0.00725254	9.95761e-05	0.00176642	0.00106803	9.09558e-06	0.000803404	0.000114133	0.000775547	0.00114231	0.000264881	0.000219618	0.000441007	0.000317876	0.00405316	0.000246386	0.000239807	0.000391488	0.000726734
Otu14029	4.6318e-06	0	4.76613e-06	0	0	9.96274e-06	0	0	4.66342e-06	0.000298063	4.88632e-06	2.60106e-05	0	0	0	0	0	1.01608e-05	0	0	0	0	0	0	1.89321e-05	1.40204e-05	0	0	4.95742e-06	0	0.000382337	9.56169e-06	1.42252e-05	9.4714e-06	0	4.54779e-06	2.02114e-05	0	3.54826e-05	5.73542e-05	0	9.15076e-06	1.93849e-05	0	0.000461809	0	4.79614e-06	2.33029e-05	4.74989e-06
Otu14035	0	0	0	0	4.79543e-06	4.48323e-05	0	0	0	0	9.77264e-06	1.73404e-05	0	0	4.42229e-06	0	0	0	2.5998e-05	0	0	4.5788e-06	0	5.11015e-06	4.73303e-06	4.20612e-05	4.47852e-06	0	3.47019e-05	0	9.93083e-06	0.00028207	4.74172e-06	0	0	0	0	0	1.52068e-05	0	0	0	4.84623e-06	0	8.96716e-06	5.02828e-06	1.91846e-05	7.45691e-05	9.49979e-06
Otu14041	2.77908e-05	9.68139e-06	3.33629e-05	0	6.7136e-05	0.000278957	1.19044e-05	1.38674e-05	2.79805e-05	2.83869e-05	9.77264e-06	5.20212e-05	4.62366e-06	1.38729e-05	0.000455496	0	5.07179e-05	0.000187975	2.5998e-05	4.45012e-06	0	0	0	5.11015e-06	0.000487502	0	4.47852e-06	0	2.97445e-05	0	4.96542e-06	0	0	4.7357e-06	3.05151e-05	0	2.02114e-05	4.96231e-06	3.54826e-05	7.64723e-05	5.49753e-05	1.83015e-05	0.000213234	0	4.48358e-06	3.5198e-05	9.59228e-06	2.79634e-05	0
Otu14047	6.48451e-05	9.68139e-06	9.53225e-06	0	2.87726e-05	0.00103612	7.73786e-05	1.84898e-05	0.00016322	0.000208171	0	5.20212e-05	4.62366e-06	1.84972e-05	3.98006e-05	0	5.99393e-05	0.00012701	4.333e-06	4.45012e-06	0	0	4.93029e-05	1.02203e-05	2.83982e-05	0	0	0	9.91483e-06	0	1.48962e-05	0	0	1.89428e-05	0	0	0.000186956	3.47362e-05	0.000293998	0	1.49933e-05	0	0.000145387	0	7.17373e-05	5.53111e-05	0	0.000321579	0
Otu14068	0	0	3.33629e-05	0	0	4.98137e-06	0	0	0	0	0	1.73404e-05	0	0	0	0	0	0	0	0	0	0	0	0	1.41991e-05	0	0	0	0	0	0	0	4.74172e-06	0	0	0	0	0	0	0	0	4.57538e-06	0	0	4.48358e-05	0	0	0	0
Otu14076	2.3159e-05	0	1.90645e-05	0	5.75451e-05	0.000129516	6.54742e-05	3.23572e-05	0.00108658	0.000108817	0	2.16755e-05	0	4.6243e-06	4.42229e-05	0	0	0.000609648	0	0	0	0	0	2.04406e-05	5.67964e-05	4.67347e-06	3.58282e-05	0	0	0	9.93083e-06	9.56169e-06	0	1.89428e-05	5.08585e-05	0	3.537e-05	0	4.56204e-05	0	3.49843e-05	9.15076e-06	9.69246e-05	9.48884e-06	0.00012554	2.51414e-05	4.79614e-06	8.85508e-05	3.32493e-05
Otu14079	9.26359e-06	4.84069e-06	2.38306e-05	0	1.91817e-05	9.96274e-06	0	4.62246e-06	0	0	1.95453e-05	0	0	4.6243e-06	0	3.56366e-05	1.84429e-05	0	0	0	0	0	0	0	4.73303e-06	0	0	0	0	0	0	4.78085e-06	0	0	0.000137318	0	5.05285e-06	4.96231e-06	8.1103e-05	0	0	4.57538e-06	0	0	0	0	4.31653e-05	4.66057e-06	4.74989e-06
Otu14082	5.55815e-05	0	0.000152516	0	0.000234976	0.00388049	0.000166662	0.000152541	0.000139903	0.000283869	4.88632e-06	6.06914e-05	7.86022e-05	0.000328325	0.000119402	8.90916e-06	0.000631668	0.00162573	1.7332e-05	7.12019e-05	0	0	4.43726e-05	0.000107313	0.000137258	2.80408e-05	4.47852e-06	0	3.47019e-05	0	1.48962e-05	1.43425e-05	0	0.000104185	0.000203434	0	0.000156638	0	0.000126723	4.77952e-06	5.9973e-05	4.11784e-05	0.000111463	0	0.00139888	7.0396e-05	9.59228e-06	0.000167781	5.69987e-05
Otu14088	1.38954e-05	4.84069e-06	1.42984e-05	0	5.27497e-05	7.97019e-05	2.38088e-05	9.24492e-06	4.66342e-06	6.62361e-05	0	4.3351e-06	0	4.6243e-06	4.42229e-06	0	0	3.04824e-05	1.2999e-05	0	0	0	0	0	2.36652e-05	0	0	0	0	0	0	0	0	4.7357e-06	0	0	2.02114e-05	0	1.01379e-05	4.77952e-06	0	0	2.90774e-05	0	0	1.50849e-05	0	7.45691e-05	2.37495e-05
Otu14095	0	0	0	1.85629e-05	0	4.98137e-05	3.57132e-05	9.24492e-06	6.06244e-05	4.73115e-06	0	0	0	0.000101735	8.84459e-06	0	0	6.60452e-05	0	4.45012e-06	0	0	0	0	9.46607e-06	0	0	0	0	0	4.96542e-06	0	0	1.42071e-05	0.000289893	7.73124e-05	1.51586e-05	1.48869e-05	5.06894e-06	0	0	1.37261e-05	3.87698e-05	0	0	0	4.79614e-06	2.33029e-05	4.74989e-06
Otu14096	3.24226e-05	4.84069e-06	2.38306e-05	0	0.000402816	8.46833e-05	7.14264e-05	2.31123e-05	6.52878e-05	0.000236558	0	0	4.16129e-05	9.2486e-06	0.000995016	4.45458e-06	0.000331972	6.09648e-05	4.333e-06	0.000235856	0	0	6.9024e-05	2.04406e-05	0.000345511	4.67347e-06	0	0	9.91483e-06	0	0	0	0	4.7357e-06	1.52575e-05	0	0.000272854	9.92462e-06	0.000319343	1.91181e-05	5.49753e-05	0	0.000111463	0	0.000197278	4.52546e-05	9.59228e-06	0	5.22488e-05
Otu14098	2.3159e-05	0	2.85968e-05	0	4.79543e-06	6.47578e-05	3.57132e-05	3.23572e-05	4.66342e-06	6.1505e-05	4.88632e-06	4.3351e-06	0	4.6243e-06	0.000137091	0	0	1.52412e-05	0	8.90024e-06	0	0	1.47909e-05	0	9.93937e-05	0	0	0	0	0	4.96542e-06	0	0	2.36785e-05	2.03434e-05	0	2.52643e-05	9.92462e-06	5.06894e-06	0	4.99775e-06	0	4.84623e-06	0	3.13851e-05	1.00566e-05	0	1.86423e-05	5.69987e-05
Otu14121	0	0	4.76613e-06	0	2.87726e-05	0.000124534	4.76176e-05	0	2.33171e-05	9.4623e-06	0	1.30053e-05	0	4.6243e-06	3.53783e-05	0	0	0	8.666e-06	2.67007e-05	0	0	4.93029e-06	1.02203e-05	2.83982e-05	4.67347e-06	0	0	4.95742e-06	0	0	4.78085e-06	0	9.4714e-06	0	0	1.01057e-05	1.48869e-05	1.01379e-05	0	0	1.37261e-05	0	0	1.34507e-05	0	4.79614e-06	1.39817e-05	9.49979e-06
Otu14131	0	0	9.53225e-05	0	4.79543e-06	9.96274e-06	7.14264e-05	0	2.79805e-05	1.89246e-05	0	8.67021e-06	0	1.38729e-05	2.65338e-05	0	4.61072e-06	0.000172734	0	5.78516e-05	5.05094e-06	0	4.93029e-06	0	9.46607e-06	0	0	0	0	0	0	0	0	4.7357e-06	1.01717e-05	0	1.51586e-05	4.96231e-06	2.02758e-05	9.55904e-06	5.9973e-05	4.11784e-05	1.93849e-05	0	4.48358e-06	1.00566e-05	0	0.000139817	0
Otu14135	2.3159e-05	4.84069e-06	7.14919e-05	0	4.31588e-05	9.96274e-05	0.000303562	1.84898e-05	1.86537e-05	0.000141935	0	4.76861e-05	2.77419e-05	9.2486e-06	8.40236e-05	4.45458e-06	0	2.03216e-05	4.333e-06	2.22506e-05	0	0	9.86057e-06	5.11015e-06	3.31312e-05	9.34693e-06	4.47852e-06	0	4.95742e-06	0	4.96542e-06	0	4.74172e-06	0	6.6116e-05	4.09301e-05	7.07399e-05	1.48869e-05	0.000167275	4.77952e-06	0.000204908	9.15076e-06	0.000159926	0	4.48358e-05	2.51414e-05	1.91846e-05	0.000139817	3.32493e-05
Otu14153	0	0	9.53225e-06	0	9.59085e-06	0.000139478	2.38088e-05	0	2.33171e-05	0.000137203	4.88632e-06	0	0	9.2486e-06	0.000106135	0	0	3.04824e-05	1.7332e-05	0	5.05094e-06	0	0	0	0.000250851	0	0	0	0	0	0	0	0	4.7357e-06	5.08585e-06	0	0.00010611	0	0.000258516	4.77952e-06	9.9955e-06	9.15076e-06	0	0	2.24179e-05	1.50849e-05	0	2.79634e-05	0
Otu14167	3.24226e-05	0	4.28951e-05	0	9.11131e-05	0.00233626	4.76176e-05	1.84898e-05	7.92781e-05	2.36558e-05	0	3.03457e-05	0	9.2486e-06	7.5179e-05	4.45458e-06	4.61072e-06	0.000137171	6.9328e-05	1.33504e-05	0	0	4.93029e-06	5.11015e-06	0.000236652	4.67347e-06	2.23926e-05	0	1.48722e-05	5.29585e-05	0	0	0	2.84142e-05	2.03434e-05	0	9.60042e-05	2.97739e-05	0.000172344	7.16928e-05	3.49843e-05	4.57538e-06	9.69246e-06	0	2.24179e-05	0	0	4.19451e-05	0
Otu14210	0	0	1.42984e-05	0	0	4.98137e-06	4.16654e-05	0	4.66342e-06	1.89246e-05	9.77264e-06	3.46808e-05	9.24731e-06	9.2486e-06	1.32669e-05	0	9.22143e-06	5.0804e-06	0	0	0	0	0	0	1.41991e-05	1.40204e-05	1.79141e-05	0	9.91483e-06	4.8144e-06	5.46196e-05	8.12744e-05	0	1.42071e-05	1.52575e-05	0	0	4.96231e-06	5.06894e-06	1.43386e-05	1.9991e-05	3.20277e-05	9.69246e-06	0	2.24179e-05	5.02828e-06	9.59228e-06	1.86423e-05	0
Otu14230	0	0	0	0	4.79543e-06	6.47578e-05	0	0	0	9.4623e-06	0	0	0	0	0	0	0	0	0	4.45012e-06	5.05094e-06	0	0	0	4.73303e-06	0	0	0	0	0	0	0	0	0	0.000244121	0	0	0	6.58962e-05	0	0	0	0	0	0	0	0	4.66057e-06	0
Otu14233	0	0	0	0	0	0	0	0	0	0	4.88632e-06	4.3351e-06	0	0	0	0	0	0	0	0	0	0	0	0	0	0	0	0	0	0	5.46196e-05	9.56169e-06	0	0	0	0	0	4.96231e-06	0	0	0	0	4.84623e-06	0	4.48358e-06	0	0	0	0
Otu14260	0	4.84069e-06	1.42984e-05	0	3.3568e-05	3.48696e-05	3.57132e-05	0	9.32684e-06	4.73115e-06	0	8.67021e-06	9.24731e-06	0	9.28682e-05	0	4.61072e-06	3.04824e-05	0	1.33504e-05	0	0	1.47909e-05	0	0	4.67347e-06	0	0	0	0	4.96542e-06	0	4.74172e-06	1.42071e-05	0	0	0	1.98492e-05	0	0	0	1.37261e-05	0	0	1.34507e-05	1.50849e-05	0	4.66057e-06	4.74989e-05
Otu14271	0	0	0	0	4.79543e-06	2.49068e-05	0	0	4.66342e-06	9.4623e-06	0	0	0	0	0.000897726	0	0	8.12864e-05	4.333e-06	0	0	0	0	0	0.000160923	0	0	0	0	0	0	0	0	4.7357e-06	0	0	1.01057e-05	0	2.02758e-05	0	0	0	0	0	8.96716e-06	5.02828e-06	0	0	0
Otu1430	4.6318e-06	4.84069e-06	4.76613e-06	0	0	4.98137e-06	2.38088e-05	0	0	9.4623e-06	4.88632e-06	0	0	9.2486e-06	0	0	0	0	0	0	0	0	0	0	0	0	0	0	0	0	4.96542e-06	0	4.74172e-06	9.4714e-06	5.08585e-06	0	0	0	1.01379e-05	0	0	1.37261e-05	0	0	1.34507e-05	0	0	4.66057e-06	4.74989e-06
Otu14326	0	0	4.76613e-06	0	1.91817e-05	9.96274e-06	0	0	0	1.89246e-05	0	1.30053e-05	0	0	4.42229e-06	0.000124728	0	5.0804e-06	4.333e-06	0	0	0	0	0	1.89321e-05	0	4.47852e-06	0	0	0	4.96542e-06	0	0	0	5.08585e-06	0	1.01057e-05	0	1.52068e-05	0	0	0	0	0	1.79343e-05	0	0	9.32114e-06	0
Otu14327	0	0	1.90645e-05	0	0	0	0	0	0	0	0	0	0	0	0	0	2.76643e-05	0	0	0	0	0	0	0	0	0	0	0	0	0	0	0	0	0	0	0	5.05285e-06	4.96231e-06	0	4.77952e-06	4.49798e-05	4.57538e-06	0	0	1.34507e-05	0	0	3.2624e-05	2.37495e-05
Otu14339	0	4.84069e-06	0	0	0	0	0	0	0	0	0	4.3351e-06	0	0	0.000234382	0	0	0	0	0	0	0	0	0	0	0	0	0	0	0	0	0	0	0	0	0	0	0	0	0	0	0	0	0	0	0	0	0	0
Otu14369	0	0	4.76613e-06	0	0	9.96274e-06	0	0	0	0	0	4.3351e-06	0	4.6243e-06	0	0	0	0	0	8.90024e-06	0	0	0	0	0	0	0	0	0	0	0	0	0	0	0	0	0	0	0	0	4.99775e-06	0	7.75397e-05	0	1.34507e-05	1.00566e-05	4.79614e-06	1.86423e-05	0
Otu14382	9.26359e-06	0	1.42984e-05	0	0	6.47578e-05	0	0	0	1.41935e-05	0	8.67021e-06	0	9.2486e-06	4.42229e-06	0	1.84429e-05	3.04824e-05	0	0	0	0	0	0	8.99276e-05	0	0	0	0	0	0	0	0	0	1.01717e-05	0	0	0	0	0	0	0	0	0	0.000103122	5.02828e-06	0	0	4.74989e-06
Otu14395	0	0	0	0	9.59085e-06	1.99255e-05	5.9522e-06	0	0	2.36558e-05	0	0	0	0	0	0	0	3.04824e-05	8.666e-06	0	0	0	0	0	6.15294e-05	0	0	0	0	0	0	0	0	0	0	0	2.02114e-05	0	1.52068e-05	0	4.99775e-06	0	0	0	0	0	0	9.32114e-06	0
Otu14434	0	0	4.76613e-06	0	4.79543e-06	2.98882e-05	1.78566e-05	9.24492e-06	1.39903e-05	0	0	2.60106e-05	0	1.38729e-05	7.96013e-05	0	0	2.03216e-05	0	8.90024e-06	5.05094e-06	0	0	0	9.46607e-06	4.67347e-06	0	0	2.97445e-05	0	0	0	0	0	0.000300065	0	6.56871e-05	0	0	0	4.99775e-06	0	0	0	0.000596316	0	0	2.79634e-05	2.37495e-05
Otu14483	0	0	0	0	0	0.000119553	0	0	0	9.4623e-06	0	4.3351e-06	0	0	4.42229e-06	0	0	5.0804e-06	0	0	0	0	0	0	0	0	0	0	0	0	0	0	0	0	0	0	0	0	0	0	0	0	0	0	8.96716e-06	2.51414e-05	0	2.79634e-05	0
Otu14490	1.85272e-05	0	4.76613e-06	0	0	0	0	0	4.66342e-06	4.73115e-06	0	0	0	0	4.42229e-06	0	0	0.000675693	0	0	0	0	0	0	0	0	0	0	0	0	0	0	0	0	5.59443e-05	0	1.51586e-05	0	2.53447e-05	4.77952e-06	4.99775e-06	4.57538e-06	0	1.42333e-05	4.48358e-06	0	0	3.2624e-05	0
Otu14544	4.6318e-06	0	9.53225e-06	0	0	0	1.78566e-05	9.24492e-06	0	1.41935e-05	0	0	0	1.38729e-05	1.76892e-05	0	0	0	4.333e-06	4.45012e-06	0	0	0	0	9.46607e-06	0	0	0	9.91483e-06	0	0	0	0	4.7357e-06	0	0	3.537e-05	0	1.52068e-05	0	0	1.37261e-05	9.69246e-06	0	8.96716e-06	0	0	9.32114e-06	0
Otu14571	4.6318e-06	0	4.76613e-06	0	0	9.96274e-06	1.78566e-05	0	4.66342e-06	4.73115e-06	0	0	0	0	0	0	0	5.58844e-05	0	0	0	0	0	5.11015e-06	4.73303e-06	0	0	0	0	0	0	4.78085e-06	0	9.4714e-06	2.03434e-05	0	1.01057e-05	0	0	0	2.99865e-05	0	0	0	4.48358e-06	0	0	0	4.74989e-06
Otu147095	0	0	0	0	0	4.98137e-06	0	0	0	9.4623e-06	0	0	0	0	4.42229e-06	0	0	0	0	0	0	0	0	0	3.78643e-05	0	0	0	0	0	0	0	0	0	0	0	0	0	0	0	0	0.000292824	0	0	0	0	0	0	0
Otu1481	9.26359e-06	0	9.53225e-06	0	0	0	0	0	0	0	0	0	0	0	0	0	4.61072e-06	0	0	0	0	0	0	0	0	9.34693e-06	0	0	0	0	1.48962e-05	5.25893e-05	0	4.7357e-06	0	0	0	0	0	0	0	0	0	0	4.48358e-06	0	0	4.66057e-06	0
Otu14843	0	0	0	0	0	0	7.73786e-05	0	0	0	0	0	0	4.6243e-06	0	0	0	0	0	0	0	0	0	0	0	0	0	0	0	0	0	0	0	0	0	0	0	0	0	0	0	0	0	0	1.34507e-05	0	0	9.32114e-06	0
Otu14933	0	0	0	0	0	4.98137e-06	0	0	0	0	0	4.3351e-06	0	0	8.84459e-06	0	0	0	4.333e-06	0	0	0	4.93029e-06	0	0	0	0	0	0	0	4.96542e-06	0	0	4.7357e-06	1.01717e-05	0	0	0	2.02758e-05	0	0	0	0	0	0	0	0	4.66057e-06	9.49979e-06
Otu14979	0	0	0	0	9.59085e-06	1.49441e-05	0	9.24492e-06	0	9.4623e-06	0	0	0	9.2486e-06	8.84459e-06	0	0	2.03216e-05	0	0	0	0	0	0	0.000288715	4.67347e-06	0	0	0	0	4.96542e-06	0	0	0	0	0	0	9.92462e-06	0	0	0	4.57538e-06	4.84623e-06	0	0	5.02828e-06	0	4.66057e-06	2.37495e-05
Otu14992	0	0	0	0	0	0	0	0	0	0	0	0	0	0	0	0	0	1.01608e-05	0	0	0	0	0	0	1.41991e-05	0	0	0	0	0	0	0	0	5.20927e-05	0	0	0	0	0	0	0	0	0	0	0	0	0	9.32114e-06	0
Otu1515	0	0	9.53225e-06	0	0	0	0	4.62246e-06	9.32684e-06	9.4623e-06	0	8.67021e-06	0	0	0	4.45458e-06	0	5.58844e-05	0	0	0	0	0	0	0	0	0	0	0	0	4.96542e-06	0	0	0	0	0	0	4.96231e-06	0	0	0	0	0	0	0	0	0	4.66057e-06	4.74989e-06
Otu15163	0	0	4.76613e-06	0	0	0.000104609	0	0	0	0	9.77264e-06	0	0	0	0	0	0	0	0	0	0	0	0	0	0	0	0	0	0	0	0	0	0	0	0	0	0	0	0	0	0	0	4.84623e-06	0	0	0	0	0	0
Otu15194	0	0	0	0	0	0	0	0	0	0	0	1.30053e-05	0	0	0	4.45458e-06	0	0	0	0	0	0	0	0	9.46607e-06	4.67347e-06	0	0	0	0	4.96542e-06	8.12744e-05	0	0	0	0	0	0	0	0	0	0	0	0	0	0	0	0	0
Otu15309	0	0	4.76613e-06	0	4.79543e-06	0	5.9522e-06	0	0	4.73115e-06	0	4.3351e-06	0	0	3.53783e-05	0	0	0	0	0	0	0	0	0	0	0	0	0	4.95742e-06	0	0	0	0	0	0	0	3.03171e-05	0	0	0	4.99775e-06	0	0	0	8.96716e-06	0	0	0	9.49979e-06
Otu15345	9.26359e-06	0	0	0	0	9.96274e-06	0	0	0	0	0	0	4.62366e-06	0	4.42229e-06	0	0	0	0	0	0	0	0	0	9.46607e-06	0	0	0	0	0	0	0	0	0	0	0	0	0	0	0	0	0	0	0	0	0	0	0	0
Otu153671	2.3159e-05	4.84069e-06	4.76613e-06	0	1.43863e-05	1.99255e-05	5.9522e-06	0	0	1.41935e-05	0	3.46808e-05	0	4.6243e-06	8.84459e-06	0	4.61072e-06	5.0804e-06	0	4.45012e-06	0	0	0	0	0	9.34693e-06	0	0	4.95742e-06	0	1.48962e-05	4.78085e-06	0	4.7357e-06	5.08585e-06	0	1.51586e-05	0	1.52068e-05	1.91181e-05	1.49933e-05	1.83015e-05	4.84623e-06	0	1.34507e-05	2.01131e-05	0	1.39817e-05	0
Otu153692	0	0	0	0	0	0	0	0	0	0	4.88632e-06	0	0	0	0	0	0	5.0804e-06	0	0	0	0	0	0	0	0	0	0	0	0	5.9585e-05	0	0	0	0	0	0	0	0	0	0	4.57538e-06	0	0	0	0	0	1.39817e-05	0
Otu15384	2.77908e-05	0	4.76613e-05	0	9.59085e-06	2.49068e-05	1.19044e-05	4.62246e-06	4.66342e-06	4.73115e-06	0	8.67021e-06	0	1.38729e-05	4.86452e-05	0	0	5.0804e-06	0	0	0	0	0	0	6.15294e-05	0	0	0	0	0	4.96542e-06	0	0	0	0	0	1.51586e-05	0	0	0	4.99775e-06	1.37261e-05	0	0	0	0	9.59228e-06	1.39817e-05	0
Otu1542	0	0	0	0	0	0.000119553	0	0	0	4.73115e-06	0	0	0	9.2486e-06	0	0	0	0	0	0	0	0	0	0	0	0	0	0	0	0	4.96542e-06	0	0	0	0	0	0	0	0	0	0	0	0	0	0	0	0	9.32114e-06	0
Otu15466	0	0	0	0	0	4.98137e-06	5.9522e-06	0	0	4.73115e-06	0	8.67021e-06	0	1.84972e-05	5.30675e-05	0	0	0	4.333e-06	0	0	0	0	0	0	0	0	0	0	0	0	0	0	0	0	0	0	0	0	0	0	4.57538e-06	0	0	0	0	0	0	0
Otu15469	4.6318e-06	0	9.53225e-06	0	4.79543e-06	3.48696e-05	5.9522e-06	4.62246e-06	4.66342e-06	9.4623e-06	9.77264e-06	0	0	4.6243e-06	4.42229e-06	4.45458e-06	9.22143e-06	0	4.333e-06	4.45012e-06	0	0	5.42331e-05	5.11015e-06	4.73303e-06	0	4.47852e-06	0	4.95742e-06	0	0	0	0	9.4714e-06	0	0	5.05285e-06	0	1.52068e-05	0	0	3.66031e-05	9.69246e-06	0	0	0	0	9.32114e-06	4.74989e-06
Otu155344	0	0	0	0	0	0	0	0	0	0	0	0	0	0	4.42229e-06	0	0	0	0	0	0	0	0	0	0	0	0	0	0	0	0	0	0	0	0	0	0	0	8.61719e-05	0	0	0	0	0	4.48358e-06	0	0	0	0
Otu15542	9.26359e-06	9.68139e-06	2.85968e-05	0	9.59085e-06	6.97392e-05	0	4.62246e-06	1.86537e-05	4.73115e-06	0	3.03457e-05	2.77419e-05	3.23701e-05	1.32669e-05	4.45458e-06	4.61072e-06	5.0804e-06	3.0331e-05	0	0	0	0	1.53304e-05	0	0	0	0	0	0	0	0	0	4.7357e-06	5.08585e-06	0	0	0	5.06894e-06	0	0	1.37261e-05	0	0	8.96716e-06	1.50849e-05	4.79614e-06	1.86423e-05	4.74989e-06
Otu1560	0	0	0	0	4.79543e-06	1.99255e-05	2.38088e-05	4.62246e-06	0	1.41935e-05	0	0	0	0	8.84459e-06	4.45458e-06	0	5.0804e-06	4.333e-06	0	0	0	0	0	1.41991e-05	0	0	0	0	0	4.96542e-06	0	0	1.89428e-05	0	0	0	2.48116e-05	4.05515e-05	9.55904e-06	0	0	2.90774e-05	0	0	5.02828e-06	0	0	0
Otu15631	0	0	0	0	0	0	0	0	0	0	0	4.3351e-06	0	0	0	0	0	0.000116849	0	0	0	0	1.97211e-05	0	0	9.34693e-06	0	0	0	0	0	0	0	0	0	0	0	0	0	0	0	0	0	0	0	0	0	0	0
Otu1566	9.26359e-06	0	4.76613e-06	0	0	1.49441e-05	0	4.62246e-06	0	0	0	0	0	0	4.42229e-06	0	0	0	4.333e-06	0	0	0	0	0.000260618	0	0	0	0	0	0	0	4.78085e-06	0	4.7357e-06	0	0	3.537e-05	0	5.06894e-06	0	0	0	4.84623e-06	0	0	0	0	4.66057e-06	9.49979e-06
Otu15706	2.3159e-05	0	1.90645e-05	0	4.79543e-06	5.47951e-05	4.76176e-05	4.62246e-06	9.32684e-06	0.00012301	0	1.30053e-05	0	0	8.84459e-06	0	0	5.0804e-06	0	4.45012e-06	0	4.5788e-06	0	0	2.36652e-05	0	8.95704e-06	0	0	0	4.96542e-06	9.56169e-06	0	4.7357e-06	0	0	5.55814e-05	0	2.53447e-05	0	9.9955e-06	4.57538e-06	9.69246e-06	0	4.48358e-06	0	0	1.39817e-05	0
Otu15788	0	0	0	0	0	0	0	0	0	0	0	0	0	0	4.42229e-06	0	0	0	0	0	0	0	0	0	0	0	0	0	0	0	0	0	0	4.7357e-06	0	0	5.05285e-06	0	0	0	0	9.15076e-06	0	0	0	0	0	6.5248e-05	0
Otu15822	0	0	4.76613e-06	0	0	5.97764e-05	5.9522e-06	0	4.66342e-06	4.73115e-06	0	4.3351e-06	0	0	0	0	3.2275e-05	1.52412e-05	0	0	0	0	0	0	4.73303e-06	0	0	0	0	0	4.96542e-06	0	0	0	0	0	5.05285e-06	0	5.06894e-06	0	0	0	0	0	9.41552e-05	0	0	9.32114e-06	0
Otu15842	1.38954e-05	0	0	0	0	3.9851e-05	5.9522e-06	0	0	0	0	0	0	0	8.84459e-06	4.45458e-06	0	5.0804e-06	4.333e-06	0	0	0	0	0	7.57285e-05	0	0	0	0	0	0	0	0	0	0	0	0	0	2.53447e-05	0	0	1.83015e-05	0	0	0	0	0	0	0
Otu16010	0	0	0	0	5.75451e-05	9.96274e-06	0	0	2.79805e-05	0	0	0	0	9.2486e-06	1.32669e-05	0	1.38322e-05	5.0804e-06	4.333e-06	8.90024e-06	0	0	4.93029e-06	5.11015e-06	9.46607e-06	0	0	0	0	0	0	0	0	0	0	0	0	4.96231e-06	5.06894e-06	0	0	4.57538e-06	4.84623e-06	0	0	0	9.59228e-06	2.79634e-05	0
Otu16347	0	0	0	0	1.43863e-05	1.99255e-05	0	0	0.000209854	1.41935e-05	0	0	4.62366e-06	4.6243e-06	0	4.45458e-06	0	0	0	4.45012e-06	0	0	0	0	9.46607e-06	9.34693e-06	4.47852e-06	0	0	0	0	0	0	4.7357e-06	0	4.54779e-06	5.05285e-06	4.96231e-06	0	0	0	0	0	0	8.96716e-06	5.02828e-06	0	9.32114e-06	4.74989e-06
Otu1638	9.26359e-06	4.84069e-06	0	0	0	6.47578e-05	0	0	0	1.89246e-05	0	0	0	0	8.84459e-06	0	0	6.09648e-05	0	0	0	0	1.47909e-05	0	2.83982e-05	0	0	0	0	0	0	0	0	0	0.00012206	0	5.05285e-06	0	0	0	0	4.57538e-06	0	0	0	0	0	4.66057e-06	0
Otu16494	4.6318e-06	0	0	4.64074e-06	0	4.98137e-06	2.38088e-05	0	0	0.000127741	0	0	9.24731e-06	0	4.42229e-06	0	1.84429e-05	0	0	0	0	0	0	1.02203e-05	0	0	0	0	0	0	0	0	0	0	0	0	5.05285e-06	0	0	9.55904e-06	0	0	0	0	0	0	0	1.86423e-05	0
Otu16521	0	0	0	0	0	0	0	0	0	4.73115e-06	0	0	0.000110968	0	0	0	0	0	0	0	0	0	0	0	0	0	0	0	0	4.8144e-06	0	0	0	0	0	0	0	0	0	4.77952e-06	0	0	0	0	1.34507e-05	0	0	0	0
Otu166188	0	0	0	0	0	4.98137e-06	8.92831e-05	0	0	0	0	0	0	0	0	0	0	0	0	0	0	0	0	5.11015e-06	0	0	0	0	0	0	0	0	0	4.7357e-06	0	0	0	1.48869e-05	0	0	0	4.57538e-06	0	0	0	0	0	9.32114e-06	0
Otu17160	4.6318e-06	0	6.67258e-05	0	2.39771e-05	0.000179329	4.16654e-05	4.62246e-06	0.000214517	9.4623e-06	4.88632e-06	4.3351e-06	0	1.38729e-05	2.21115e-05	0	1.38322e-05	2.5402e-05	0	4.45012e-06	0	0	4.93029e-06	5.11015e-06	6.62625e-05	4.67347e-06	4.47852e-06	0	9.91483e-06	0	9.93083e-06	4.78085e-06	4.74172e-06	9.4714e-06	4.57726e-05	0	3.03171e-05	1.48869e-05	1.01379e-05	6.21338e-05	4.99775e-06	5.49046e-05	0.000155079	0	8.07045e-05	0.000140792	4.79614e-06	4.66057e-06	0
Otu17252	0	0	4.76613e-06	0	0	0	0	0	0	0	0	8.67021e-06	0	0	0	0	2.76643e-05	0	0	0	0	0	0	0	0	0	0	0	1.98297e-05	0	0	0	0	1.42071e-05	5.08585e-06	0	0	0	0	4.77952e-06	0	0	9.69246e-06	0	4.48358e-06	0	0	9.32114e-06	0
Otu173692	0	0	0	0	0	9.96274e-06	0	4.62246e-06	0	4.73115e-06	6.35222e-05	0	0	0	0	0	0	0	0	0	0	0	0	0	0	4.67347e-06	0	0	0	0	4.96542e-06	0	0	1.42071e-05	0	0	0	0	0	0	0	0	9.69246e-06	0	0	3.01697e-05	0	4.66057e-06	0
Otu17403	0	0	0	0	0	0	0	0	0	4.73115e-06	0	0	0	0	0	0	0	0	0	0	0	0	0	0	0	0	0	0	0	0	0	0	0	0	0	0	0	0	0	0	0	0	0	0	0	0	0	0	0
Otu17615	0	0	0	0	4.79543e-06	4.98137e-06	0	0	0	0	0	0	0	0	4.42229e-06	0	0	0	0	0	0	0	0	0	0	0	0	0	0	0	0	0	0	0	0	0	0	0	5.06894e-06	0	0	0	0	0	0	0	0	4.66057e-06	0
Otu17898	0	0	0	0	0	0	0	0	0	0	0	0	0	0	0	0	0	0	0	0	0	0	0	0	0	0	0	0	0	0	0	0	0	0	9.15453e-05	0	0	0	0	0	0	0	0	0	0	0	0	4.66057e-06	0
Otu1815	0	0	0	0	0	7.97019e-05	0	0	0	0	0	8.67021e-06	0	0	0	0	4.61072e-06	0	0	0	0	0	0	0	9.93937e-05	0	0	0	0	0	0	0	0	0	1.01717e-05	0	5.05285e-06	0	0	0	0	0	0	0	0	0	0	4.66057e-06	0
Otu18207	0	0	0	0	0	0	0	0	0	0	0	0	0	0	0	0	4.61072e-06	9.14472e-05	0	0	0	0	0	0	4.73303e-06	4.67347e-06	0	0	0	0	0	0	0	0	0	0	0	0	0	0	0	4.57538e-06	0	0	0	0	0	0	0
Otu1833	0	0	4.76613e-06	0	0	0	0	0	0	0	1.4659e-05	1.30053e-05	0	0	0	0	9.22143e-06	1.01608e-05	0	1.78005e-05	1.01019e-05	0	0	0	4.73303e-06	0	0	0	0	0	1.98617e-05	1.43425e-05	0	0	0	0	2.02114e-05	0	0	0	0	0	0	0	0	0	0	4.66057e-06	9.0248e-05
Otu1841	0	0	0	0	0	0	0	0	0	0	0	0	1.3871e-05	0	0	0	0	0	0	0	0	0	0	0	4.73303e-05	4.67347e-06	0	0	0	0	0	0	0	0	0	0	0	0	4.56204e-05	0	0	0	0	0	0	0	0	0	0
Otu1844	0	0	0	0	4.79543e-06	1.49441e-05	1.19044e-05	9.24492e-06	0	4.73115e-06	4.88632e-06	0	0	1.38729e-05	1.76892e-05	0	4.61072e-06	0	8.666e-06	2.22506e-05	0	0	0	4.08812e-05	1.89321e-05	4.67347e-06	0	0	0	0	4.96542e-06	0	0	1.89428e-05	0	4.54779e-06	5.05285e-05	0	0	4.77952e-06	4.99775e-06	9.15076e-06	0	0	4.48358e-06	0	0	9.32114e-06	0
Otu18496	5.09497e-05	0	0	0	0.000589838	4.98137e-06	0	0	0	0	0	0	0	0	0.00032725	0	0	9.65275e-05	0	0	0	0	0	0	0.00326579	0	0	0	0	0	0	0	0	9.4714e-06	0	0	3.03171e-05	0	7.60341e-05	0	0	0	0	0	3.13851e-05	0	0	9.32114e-06	9.49979e-06
Otu18983	4.6318e-06	0	0	0	0	0	0	0	0	0	0	4.3351e-06	0	4.6243e-06	0	0	0	0	4.333e-06	0	0	0	0	0	0	0	0	0	0	0	0	0	0	0	0	0	0	0	0	0	0	0	0.000494315	0	8.96716e-06	0	0	9.32114e-06	0
Otu19113	0	0	0	0	0	4.98137e-06	0	0	0	1.41935e-05	0	4.3351e-06	0	0	4.86452e-05	0	0	8.63668e-05	0	0	0	0	0	1.53304e-05	0	0	0	0	0	0	0	0	0	0	0	0	5.05285e-06	0	8.61719e-05	0	0	9.15076e-06	0	0	2.24179e-05	1.00566e-05	0	0	0
Otu19138	0	0	0	0	0	0	0	5.54695e-05	0	0	0	0	0	0	0	0	0	0	0	4.45012e-06	0	0	0	0	4.73303e-06	4.67347e-06	0	0	0	0	0	0	0	0	0	0	5.05285e-06	0	0	4.77952e-06	0	0	0	0	0	0	0	0	0
Otu19417	0	0	0	0	0	4.98137e-06	4.16654e-05	0	0	0	0	4.3351e-06	0	0	0	0	0	5.0804e-06	1.2999e-05	0	0	0	0	5.11015e-05	0	0	0	0	0	0	0	4.78085e-06	0	0	0	0	1.01057e-05	0	5.06894e-06	0	0	0	0	0	0	0	4.79614e-06	0	0
Otu19565	0	0	0	0	0	0	0	0	0	1.41935e-05	0	4.3351e-06	0	0	0	0	0	0	0	0	0	0	0	0	3.78643e-05	0	0	0	0	0	0	0	0	0	0	0	0	0	0	0	0	0	0	0	0	0	0	0	0
Otu1998	0	0	0	0	9.59085e-06	0.000164385	0	0	0.000111922	0	0	0	0	0	5.30675e-05	0	3.68857e-05	0.000157492	5.6329e-05	4.45012e-06	0	0	9.86057e-06	0	4.73303e-06	0	8.95704e-06	0	0	0	9.93083e-06	0	0	0	0	0	0	0	0	0	6.49708e-05	0	0.000130848	0	0	0	4.79614e-06	1.39817e-05	0
Otu2020	4.6318e-06	0	4.76613e-06	0	0.000843995	1.49441e-05	0	0	0	0	0	4.3351e-06	0	0	0	4.45458e-06	0	0	0	0	0	0	0	0	0.000695756	0	0	0	0	0	0	0	0	0	0	0	0	0	5.06894e-06	0	0	0	0	0	4.93194e-05	0	0	0	0
Otu2089	0	0	4.76613e-06	0	0	0	5.9522e-06	9.24492e-06	4.66342e-06	0	0	4.3351e-06	1.3871e-05	0	8.84459e-06	0	4.61072e-06	0.000101608	0	0	0	0	0	1.02203e-05	9.46607e-06	0	0	0	4.95742e-06	0	0	0	0	0	0	0	0	0	0	0	0	0	8.72321e-05	0	0	0	0	0	0
Otu2175	0	0	0	0	0	0	0	0	0	0	0	0	0	0	0	0	0	9.65275e-05	0	0	0	0	0	0	0.000132525	0	0	0	0	0	0	0	0	0	0	0	0	0	5.06894e-05	4.77952e-06	0	9.15076e-06	0	0	0	0	0	0	0
Otu220	1.38954e-05	0	5.24274e-05	1.85629e-05	0.00225865	0.00513081	0.00470819	4.62246e-06	4.66342e-06	0	9.77264e-06	0.00117481	0	1.84972e-05	0	0.000971099	0.00104663	0	0.00280778	0.000867774	0	0	0.000231723	0.000275948	0.000757285	0.000401918	0.00431282	0	0.000669251	0.000452554	0.000754743	0.00437447	0	0.000516191	2.03434e-05	0	0.000101057	5.95477e-05	0.00524128	4.77952e-05	0	4.57538e-06	0.00017931	0	0.00023763	1.00566e-05	0.00113189	0.000172441	0.00203295
Otu220113	0	0	0	0	0	0	0	0	0	0	8.30674e-05	0	0	0	0	0	0	0	0	0	0	0	0	0	0	0	0	0	0	0	0	0	0	0	0	0	0	0	0	0	0	0	0	0	0	0	4.79614e-06	0	0
Otu221679	0	0	0	0	0	0	5.9522e-06	0	4.66342e-06	4.73115e-06	0	0	2.77419e-05	0	8.84459e-06	0	0	1.52412e-05	0	0	2.02038e-05	0	0	0	0	0	0	0	0	0	0	0	0	0	0	0	0	5.45854e-05	0	0	0	0	4.84623e-06	0	4.48358e-06	0	0	9.32114e-06	0
Otu22200	0	0	0	0	0	0	0	0	0	0	0	0	0	0	0	4.45458e-06	0	0	0	2.22506e-05	0	0	0	0	0	0	4.47852e-06	0	0	0	0	0	0	0	0	0	1.01057e-05	0	1.52068e-05	0	0	0	0	0	4.48358e-06	3.01697e-05	0	0	0
Otu222218	0	0	0	0	0	0	0	0	0	0	0	0	0	0	0	0	0	0	0	0	0	0	0	0	0	0	0	0	0	0	0	0	0	0	9.66311e-05	0	0	0	0	0	0	0	0	0	0	0	0	0	0
Otu225	0	0	0	0	2.87726e-05	0.00301373	0	0.000217256	0	0	0	0	0	0	0	0	0	0	0	0	0	0	0	0	0	0	0	0	0	0	4.96542e-06	0.000965731	0	0.000146807	0	0	0	0	0.000623479	0	0	0	0	0	0.000246597	0.00334381	0.0001247	0	0
Otu22947	0	0	4.76613e-06	0	0	0	0	0	0.000102595	0	0	0	0	0	1.76892e-05	0	0	0	0	0	0	0	0	0	0	0	0	0	0	0	0	0	0	0	0	0	0	0	0	0	0	0	0	0	0	0	0	0	0
Otu238834	0	0	0	0	0	0	0	0	0	0	0	0	0	0	0	0	0	0	0	0	0	0	0	0	0	0	0	0	0	0	0	0	0	4.7357e-06	0	0	0	0	0	0	0	4.57538e-06	0	0	0	0	0.000119904	0	0
Otu24171	0	0	0	0	3.83634e-05	0	0	0	0	0	0	0	4.62366e-06	0	9.28682e-05	4.45458e-06	0	1.52412e-05	4.333e-06	0	0	0	1.47909e-05	0	7.57285e-05	0	0	0	0	0	0	0	0	1.42071e-05	0	0	2.52643e-05	0	0	0	9.9955e-06	4.57538e-06	0	0	0	9.55374e-05	0	2.33029e-05	0
Otu242739	0	0	0	0	0	0	0	0	0	0	0	0	0	0	0	0	0	0	0	0	0	0	0	0	0	0	0	0	0	0	0	0	0	0	0	0	0	4.96231e-06	0	0	0	9.15076e-06	0.000111463	0	0	0	0	0	0
Otu242874	0	0	0	0	0	0	0	0	0	0	0	0	0	0	0	0	0	0	0	0	0	0	0	0	0	0	0	0	0	0	0	0	0	0	0	0	0	0	0	0	0	0	0	0	7.17373e-05	0	0	0	0
Otu243193	0	0	0	0	0	0	0	0	0	0	0	0	0	0	0	0	0	0	0	0	0	0	0	0	0	0	0	0	0	0	9.93083e-06	0	0	0	0	0	0	0	0	0	0	0	0	0	0	0	0	0	0
Otu24621	0	0	0	0	0	0	0	0	0	0	0	0	0	0	0	0	0	0	0	0	0	0	0	0	0	0	0	0	0	0	4.96542e-06	4.78085e-06	0	9.4714e-06	0	0	0	0	0	0	0	0	0	0	8.96716e-06	0	0	0	0
Otu24690	0	0	9.53225e-06	0	0	4.48323e-05	5.9522e-06	4.62246e-06	1.86537e-05	4.73115e-06	0	0	0	0	4.42229e-06	0	0	1.01608e-05	0	0	0	0	0	0	0	0	0	0	4.95742e-06	0	0	0	0	0	0	0	0	0	5.06894e-06	0	0	0	4.84623e-06	0	0.000309367	0	0	0	0
Otu25115	0	0	9.53225e-06	0	4.79543e-05	0	1.19044e-05	0	0	4.73115e-06	0	4.3351e-06	9.24731e-06	1.38729e-05	3.98006e-05	0	0	1.01608e-05	0	0	0	0	0	0	0.000189321	0	0	0	0	0	0	0	0	9.4714e-06	0	0	5.05285e-05	0	5.06894e-06	1.43386e-05	0	0	0	0	0	0	0	0	0
Otu251370	0	0	0	0	0.000158249	0	0	0	0	0	0	0	0	0	0	0	0	0	0	0	0	0	0	0	0	0	0	0	0	0	0	0	0	0	0	0	0	0	0	0	0	0	0	0	0	0	0	4.66057e-06	0
Otu25280	0	0	0	0	0	5.97764e-05	9.52353e-05	0	2.33171e-05	4.73115e-06	0	1.73404e-05	0	0	0	0	0	2.5402e-05	1.2999e-05	0	0	0	0	0	4.73303e-06	0	4.47852e-06	9.90634e-06	0	0	0	4.78085e-06	0	0	0	0	0	9.92462e-06	0	0	1.9991e-05	4.57538e-06	0.000271389	0	4.48358e-06	0	0	1.39817e-05	0
Otu25433	4.6318e-06	9.68139e-06	4.28951e-05	0	4.79543e-06	1.99255e-05	1.19044e-05	4.62246e-06	0	1.89246e-05	0	8.67021e-06	0	4.6243e-06	3.09561e-05	0	4.61072e-06	0	0	0	0	0	0	0	9.46607e-06	1.40204e-05	0	0	4.95742e-06	0	0	0	0	9.4714e-06	5.08585e-06	0	9.09514e-05	0	5.06894e-06	0	0	9.15076e-06	4.84623e-06	0	4.48358e-06	5.02828e-06	0	6.5248e-05	0
Otu25731	0	0	0	0	4.79543e-06	0.00108096	1.78566e-05	0	0	4.73115e-06	0	0	9.24731e-06	9.2486e-06	0	0	0	0	0	1.33504e-05	0	0	0	0	3.31312e-05	0	0	0	0	0	0	0	0	4.7357e-06	1.01717e-05	0	5.05285e-06	0	0	0	4.99775e-06	4.57538e-06	9.20784e-05	0	4.48358e-06	0	0	2.79634e-05	0
Otu25772	4.6318e-06	0	0	0	4.79543e-06	3.9851e-05	0	9.24492e-06	0	4.73115e-06	4.88632e-06	4.3351e-06	0	0	0.000159203	0	0	0	0	0	5.05094e-06	0	0	0	2.36652e-05	0	0	0	0	0	0	0	0	0	0	0	0	0	0	0	0	0	0	0	0	0	0	0	0
Otu263	1.38954e-05	4.84069e-06	3.33629e-05	0	0.000330884	0.000448323	8.33309e-05	2.77348e-05	0.000816098	0.000695479	0	4.3351e-06	0	0	0.00175123	4.45458e-06	0	0.00104148	0	0	0	0	9.86057e-06	0	0.05035	0	0	0	0	0	0	0	0	0	0.00012206	0	8.08456e-05	4.96231e-06	0.000187551	0	3.9982e-05	0	0	0	4.93194e-05	2.01131e-05	0	0	7.59983e-05
Otu266	0.000143586	6.2929e-05	2.85968e-05	3.71259e-05	1.43863e-05	5.97764e-05	9.52353e-05	0.000157164	3.73073e-05	0.000222364	9.77264e-06	0.00677143	4.62366e-06	0.00181273	0.0206256	0	0	0.00025402	4.333e-06	4.00511e-05	0	0	3.4512e-05	1.02203e-05	0.000146724	0	3.13496e-05	0	9.91483e-06	0	1.98617e-05	0.00011474	4.74172e-06	0.00463152	0.000106803	5.00257e-05	5.55814e-05	7.9397e-05	0.000162206	6.21338e-05	2.49888e-05	2.74523e-05	2.42311e-05	0	2.69015e-05	0	2.39807e-05	0.000116514	1.89996e-05
Otu266674	0	0	0	0	0	0	0	0	0	0	0	0	0	0	0	0	0	0	0	0	0	0	0	0	0	0	0	0	0	0	0	0	0	0	0	0	0	0	0	0	0	0	0	0	0	0	0	0	0
Otu267140	0	0	0	0	0	4.98137e-06	0	0	0	0	0	0	0	0	0	0	0	0	0	0	0	0	0	0	0	0	0	0	0	0	0	0	0	0	0	0	0	0	0	0	0	0	0	0	0	0	0	0	0
Otu267437	0	0	0	0	1.91817e-05	9.96274e-06	1.19044e-05	0	0	4.73115e-06	0	0	0	4.6243e-06	0	0	0	0	4.333e-06	0	0	0	0	0	4.73303e-06	0	0	0	0	0	8.93775e-05	0	0	4.7357e-06	0	0	1.01057e-05	0	5.06894e-06	4.77952e-06	0	1.37261e-05	0	0	1.79343e-05	0	0	4.66057e-06	0
Otu267990	4.6318e-06	0	0	0	0	0	0	0	0	0	0	0	0	0	0	0	0	5.0804e-06	0	8.90024e-06	0	0	0	0	0	0	0	0	0	0	0	0	0	0	0	0	0	0	0	0	0	0	0	0	0	0	0	0.000256331	0
Otu26971	9.26359e-06	0	9.53225e-06	0	1.43863e-05	2.49068e-05	0	0	0	0	0	8.67021e-06	0	4.6243e-06	0	0	0.000341193	0	0	0	0	0	4.93029e-06	5.11015e-06	0	0	0	0	4.95742e-06	0	0	0	0	0	0	0	1.01057e-05	4.96231e-06	0	0	0	0	0	0	4.48358e-06	0	0	9.32114e-06	0
Otu27052	0	0	0	0	4.79543e-06	6.97392e-05	5.9522e-06	4.62246e-06	0	0	4.88632e-06	4.3351e-06	0	0	0	0	0	2.5402e-05	0	0	0	0	0	0	0	0	4.47852e-06	0	0	0	0	0	0	0	0	0	5.05285e-06	0	0.000217964	0	4.49798e-05	0	0	0	0	1.00566e-05	4.79614e-06	0	0
Otu27804	0	0	0	0	0	4.98137e-06	2.38088e-05	0	0	4.73115e-05	0	0	0	4.6243e-06	4.42229e-06	0	0	0	0	4.45012e-06	0	0	0	0	9.46607e-06	0	0	0	0	0	0	0	0	0	0	0	0	0	0	0	0	0	0	0	0	0	0	5.12663e-05	0
Otu29092	0	0	0	0	0	4.98137e-06	0	9.24492e-06	0	0	0	0	0	0	0	0	0	0	0	0	0	0	0	0	4.73303e-06	0	0	0	0	0	0	0	0	0	0	0	1.01057e-05	0	0	0	0	0	0	0	0	0	0	0	0
Otu29139	0	0	9.53225e-06	0	0	0	0	4.62246e-06	4.66342e-06	0	0	4.3351e-06	0	0.000134105	0.000128247	0	0	0	4.333e-06	0.000102353	0	0	0.000133118	0	0	0	0	0	0	0	0	4.78085e-06	0	4.7357e-06	1.52575e-05	0	1.51586e-05	0	0	0	0	4.57538e-06	0	0	0	5.02828e-06	0	0	0
Otu29265	9.26359e-06	0	0	0	2.87726e-05	9.96274e-06	1.19044e-05	0	4.66342e-06	4.73115e-06	0	4.3351e-06	0	0	1.32669e-05	0	0	0.00574085	0	8.90024e-06	5.05094e-06	0	0	0	1.41991e-05	4.67347e-06	0	0	0	0	0	0	0	0	5.08585e-06	0	0	0	0	0	0	4.57538e-06	0	0	1.34507e-05	0	0	4.66057e-06	0
Otu29928	0	0	4.76613e-06	0	0	0	0	0.000147919	0	2.83869e-05	0	4.3351e-06	0	0	0	0	0	5.0804e-06	0	0	0	0	0	1.53304e-05	2.83982e-05	0	0	0	0	0	0	0	0	4.7357e-06	0	0	1.51586e-05	0	2.02758e-05	4.77952e-06	0	4.57538e-06	4.84623e-06	0	8.96716e-06	1.00566e-05	0	4.66057e-06	0
Otu299602	0	0	0	0	0	0	0	0	6.52878e-05	0	0	0	0	0	0	0	0	0	0	0	0	0	0	0	0	0	0	0	0	0	0	1.43425e-05	0	0	0	0	0	0	0	0	0	0	0	0	0	0	0	0	0
Otu30808	0	0	0	0	0	0	0	0	0	0	0	4.3351e-06	0	0	0	0	0	5.0804e-06	0	0	0	0	0	0	0	0	0	0	4.95742e-06	0	4.96542e-06	0	0	0	0	0	0	0	0	0	0	0	0	0	0	0	0	0	0
Otu31110	0	0	0	0	0	0	0	0	0	0	0	0	0	0	0	0	0	0	0	0	0	0	0	0	0	0	0	0	0	0	0	0	0	0	0	0	0	0	0	0	0	0	0	0	0	0	0	0	0
Otu31408	0	0	0	0	0	0.000627653	4.16654e-05	0	0.000839415	5.67738e-05	0	0	0	9.2486e-06	0	4.45458e-06	1.84429e-05	0.000980517	4.333e-06	4.45012e-06	8.0815e-05	0	0	5.11015e-06	0.00046857	2.80408e-05	4.47852e-06	0	0	0	0	0	0	4.7357e-06	1.52575e-05	0	5.05285e-05	9.92462e-06	3.54826e-05	1.91181e-05	4.99775e-06	0	1.45387e-05	0	0.000103122	5.02828e-06	9.59228e-06	1.86423e-05	0
Otu31481	0	0	0	0	0	0.000134497	5.9522e-06	0	4.66342e-06	4.73115e-06	0	4.3351e-06	0	4.6243e-06	0	0	4.61072e-06	0	0	0	0	0	0	0	1.41991e-05	0	0	0	0	0	0	0	0	0	0	0	2.52643e-05	0	0	0	4.99775e-06	9.15076e-06	4.84623e-06	0	0	5.02828e-06	0	4.66057e-06	0
Otu31626	0	0	0	0	0	4.98137e-06	7.14264e-05	0	0	4.73115e-06	0	0	0	0	0	0	0	5.0804e-06	0	0	0	0	0	0	0	0	0	0	0	0	0	0	0	4.7357e-06	0	0	0	0	0	0	0	0	0	0	0	0	0	4.66057e-06	0
Otu31754	0	0	0	0	0	4.98137e-06	1.78566e-05	0	0	0	0	0	0	0	0	0	0	7.11256e-05	0	0	0	0	4.93029e-06	0	9.46607e-06	0	0	0	0	0	0	0	0	0	5.08585e-06	0	5.05285e-06	0	0	4.77952e-06	0	9.15076e-06	0	0	0	0	0	0	0
Otu31844	0	0	0	0	0	0	0	0	0	0	0	4.3351e-06	4.62366e-06	0	0	0	0	0	0	0	0	0	0	0	6.15294e-05	0	0	0	0	0	0	0	0	0	0	0	0	0	5.06894e-06	0	0	0	0	0	0	0	0	0	0
Otu32378	0	9.68139e-06	0	0	4.79543e-06	4.98137e-06	0	0	4.66342e-06	0	0	0	0	4.6243e-06	0	4.45458e-06	4.61072e-06	0	0	0	0	0	0	5.11015e-06	5.20634e-05	0	0	0	0	0	0	0	0	0	0	0	2.52643e-05	0	0	0	0	0	0	0	0	0	0	4.66057e-06	0
Otu32426	0	0	0	0	0	0.00010959	0	0	0	0	0	0	0	0	1.32669e-05	0	0	0	0	0	0	0	0	0	0	0	0	0	0	0	0	0	0	0	0	0	0	0	0	0	0	0	0	0	4.48358e-06	0	0	0	0
Otu32459	9.26359e-06	0	0	0	0	4.98137e-06	0	0	0	9.4623e-06	0	0	0	0	0.000137091	0	0	1.52412e-05	0	4.45012e-06	0	0	0	0	1.41991e-05	0	0	0	0	0	0	0	0	0	0	0	2.02114e-05	0	0	0	0	0	0	0	0	5.02828e-06	0	4.66057e-05	0
Otu32731	4.6318e-06	0	9.53225e-05	0	0	0	0	0	0	0	0	8.67021e-06	0	0	0	4.45458e-06	0	0	0	0	0	0	0	0	9.46607e-06	0	0	0	0	0	0	1.43425e-05	0	0	0	0	0	0	0	0	0	0	0	0	0	0	0	0	0
Otu33017	0	0	0	0	0	0	0	0	0	0	0	0	0	0.000152602	4.42229e-06	0	0	0	0	0	0	0	0	0	0	0	0	0	0	0	0	0	0	0	0	0	0	0	0	0	0	0	0	0	0	0	0	0	0
Otu3327	4.6318e-06	0	0	0	9.59085e-06	1.99255e-05	0	0	0	4.73115e-06	9.77264e-06	0	0	0	3.09561e-05	4.45458e-06	0	1.52412e-05	4.333e-06	0	0	0	0	0	5.67964e-05	0	0	0	0	0	9.93083e-06	0	0	0	5.59443e-05	0	0	0	1.01379e-05	0	0	4.57538e-06	6.78472e-05	0	0	5.02828e-06	0	0	0
Otu33278	4.6318e-06	0	0	0	0	4.98137e-06	0	0	0	4.73115e-06	0	0	0	0	4.42229e-06	0	0	0.000157492	0	0	0	0	0	5.11015e-06	1.41991e-05	0	0	0	0	0	0	0	0	0	0	0	2.52643e-05	0	0	0	0	0	0	0	0	0	0	0	0
Otu33629	0	0	2.85968e-05	0	4.79543e-06	2.49068e-05	0	4.62246e-06	7.92781e-05	4.73115e-06	0	4.3351e-06	0	0	4.42229e-06	0	0	1.52412e-05	0	4.45012e-06	0	0	4.93029e-06	5.11015e-06	4.73303e-06	0	0	0	0	0	0	0	4.74172e-06	0	0	0	4.54757e-05	0	0	0	4.99775e-06	4.57538e-06	0	0	4.48358e-06	0	0	9.32114e-06	4.74989e-06
Otu33779	0	0	0	9.28147e-06	4.31588e-05	1.49441e-05	0	0	4.66342e-06	0	0	0	1.3871e-05	8.32374e-05	8.84459e-06	0	0	5.0804e-06	4.333e-06	0	5.05094e-06	0	0	5.11015e-06	4.73303e-06	0	0	0	2.97445e-05	0	0	0	0	0	2.03434e-05	0	5.05285e-06	1.48869e-05	1.01379e-05	9.55904e-06	0	4.57538e-06	1.45387e-05	0	1.79343e-05	5.02828e-06	0	2.33029e-05	3.32493e-05
Otu34097	0	0	0	0	0	0.000114572	0	0	0	0	0	0	0	0	3.09561e-05	0	0	0	0	0	0	0	0	0	0	0	0	0	0	0	0	0	0	0	0	0	0	0	0	0	0	0	0	0	0	0	4.79614e-06	0	0
Otu34397	0	0	0	0	4.79543e-06	0	0	0	0	0	0	0	0	0	0.000322827	0	0	0	4.333e-06	0	0	0	0	0	4.73303e-06	0	0	0	0	0	0	0	0	1.42071e-05	0	0	0	0	0	0	0	0	0	0	0	0	0	0	0
Otu3442	0	0	0	0	0	0	0	4.62246e-06	0	0	0	0	0	0	0	0	0	1.01608e-05	4.333e-06	0	5.05094e-06	0	0	0	0	0	0	0	0	0	0	0	0	4.7357e-06	0	0	5.05285e-06	0	0	0	4.99775e-06	4.57538e-06	0	0	0	0	0	0	0
Otu344466	0	0	0	0	0	0	0	0	0	0	0	0	0	0	0	0	0	0	0	0	0	0	0	0	0	0	0	0	0	0	0	0	0	0	0	0	0	0	0	9.55904e-06	0	0	0	0	0	0	0	0	0
Otu34692	4.6318e-06	4.84069e-06	1.42984e-05	0	1.91817e-05	0.000831889	0.000220232	0	0	0	0	0	1.3871e-05	4.6243e-06	3.09561e-05	0	0	0	8.666e-06	8.45523e-05	0	0	0	0	9.46607e-06	0	0	0	0	0	9.93083e-06	0	0	0	1.01717e-05	0	0	0	0	9.55904e-06	0	4.57538e-06	0	0	1.79343e-05	0	0	0	0
Otu34705	0	0	0	0	0	4.98137e-06	0	0	0	0	0	0	0	0	0	0	0	5.0804e-06	0	0	0	0	0	0	0	0	0	0	0	0	0	0	0	4.7357e-06	0	0	0	0	0.000233171	0	0	0	0	0	0	0	0	4.66057e-06	0
Otu35618	1.38954e-05	0	0	0	1.43863e-05	0	0	0	0	9.4623e-06	0	0	4.16129e-05	0	0.000123824	0	0	5.0804e-06	0	0	0	0	0	0	2.83982e-05	0	0	0	0	0	0	0	0	4.7357e-06	0	0	1.01057e-05	0	0	0	0	0	0	0	2.24179e-05	5.02828e-06	0	0	9.49979e-06
Otu36275	6.02133e-05	4.84069e-06	0.000700621	0.000102096	5.75451e-05	0.0005081	8.33309e-05	6.93369e-05	5.12976e-05	0.000141935	1.4659e-05	3.46808e-05	1.3871e-05	3.23701e-05	9.72905e-05	0	9.22143e-06	0.000137171	2.5998e-05	1.33504e-05	0	0	1.47909e-05	2.04406e-05	0.000567964	1.40204e-05	8.95704e-06	4.95317e-06	4.95742e-06	0	0	9.56169e-06	0	5.68284e-05	0.000218692	0	0.000358753	9.92462e-06	0.000111517	1.91181e-05	1.9991e-05	0.000105234	3.39236e-05	4.74442e-06	4.48358e-05	2.51414e-05	9.59228e-06	0.000158459	1.42497e-05
Otu36281	5.55815e-05	2.42035e-05	9.53225e-06	0	0.000263748	0.000592783	0.000190471	0.000383664	0.000125912	0.00032645	9.77264e-06	0.000307792	1.84946e-05	5.54916e-05	0.000358206	2.22729e-05	8.76036e-05	0.000447075	1.7332e-05	0.00037381	5.05094e-06	0	1.47909e-05	3.06609e-05	0.00452478	1.40204e-05	4.47852e-06	0	0	0	0	0	0	0.000127864	0.000142404	0	0.000272854	1.98492e-05	0.000268654	6.21338e-05	2.99865e-05	6.40553e-05	4.84623e-05	0	0.00240768	8.04525e-05	9.59228e-06	3.72846e-05	0.000180496
Otu36290	0	0	0	0	0	0	0	0	0	0	0	1.73404e-05	4.62366e-06	0	0	0	0	0	0	0	0	0	0	0	0	0	0	0	0	0	0	0	0	0	0	0	0	0	5.06894e-06	0	0	0	0	0	0	0	0	0	0
Otu36303	1.85272e-05	4.84069e-06	4.76613e-06	0	2.39771e-05	8.46833e-05	5.9522e-06	4.62246e-06	0	6.62361e-05	0	8.67021e-06	0	0	4.42229e-06	0	1.84429e-05	2.03216e-05	4.333e-06	0	0	0	4.93029e-06	0	4.25973e-05	0	0	0	0	0	1.48962e-05	0	4.74172e-06	0	0	0	1.51586e-05	9.92462e-06	2.53447e-05	0	1.49933e-05	3.20277e-05	0	4.74442e-06	2.24179e-05	4.52546e-05	4.79614e-06	9.32114e-06	4.74989e-06
Otu36327	4.6318e-06	4.84069e-06	9.53225e-06	0	2.87726e-05	0.000164385	2.9761e-05	2.77348e-05	9.32684e-06	5.20427e-05	0	1.73404e-05	0	0	3.09561e-05	0	0	2.03216e-05	3.0331e-05	9.79027e-05	5.05094e-06	0	0	0	7.09955e-05	0	0	0	9.91483e-06	0	4.96542e-06	0	4.74172e-06	4.7357e-06	2.03434e-05	9.09558e-06	7.07399e-05	0	5.06894e-06	0	0	2.74523e-05	0	0	2.24179e-05	5.02828e-06	4.79614e-06	1.39817e-05	2.84994e-05
Otu36338	9.26359e-06	9.68139e-06	1.90645e-05	0	4.79543e-06	0.000104609	1.19044e-05	1.84898e-05	2.33171e-05	1.89246e-05	1.4659e-05	4.3351e-06	0	1.84972e-05	2.21115e-05	0	0	5.0804e-05	8.666e-06	5.34014e-05	0	0	1.47909e-05	3.06609e-05	2.36652e-05	4.67347e-06	1.79141e-05	0	1.98297e-05	0	4.96542e-06	0	0	1.89428e-05	1.01717e-05	0	8.08456e-05	1.98492e-05	1.01379e-05	0	6.99685e-05	2.28769e-05	5.33085e-05	0	7.17373e-05	5.02828e-06	4.79614e-06	5.59268e-05	4.74989e-06
Otu36351	0	0	1.90645e-05	0	0	9.96274e-06	1.19044e-05	2.31123e-05	0	0.000236558	0	4.3351e-06	0	0.000157226	9.72905e-05	0	6.455e-05	3.04824e-05	0	1.78005e-05	0	0	9.86057e-06	5.11015e-06	9.46607e-06	0	0	0	4.95742e-06	0	0	0	4.74172e-06	1.42071e-05	0	0	5.05285e-06	4.96231e-06	1.01379e-05	0	4.99775e-06	0	0	0	2.24179e-05	2.51414e-05	0	0	0
Otu36490	0	0	0	0	0	0	0	0	0	0	0	0	0	0	0	0	0	0	0	0	0	0	0	0	0	0	0	0	0	0	0	0	0	1.42071e-05	5.08585e-06	0	0	0	0	0	0	4.57538e-06	0	0	0	0	0	1.39817e-05	8.07482e-05
Otu36572	0	1.45221e-05	0	0	0	4.98137e-05	0	0	0	0	0	0	4.62366e-06	0	4.42229e-06	0	0	0	1.2999e-05	0	0	0	0	0	4.73303e-06	4.67347e-06	0	0	0	0	2.48271e-05	1.91234e-05	0	0	0	0	5.05285e-06	0	1.52068e-05	4.77952e-06	0	0	4.84623e-06	0	8.96716e-06	0	0	4.66057e-06	0
Otu36953	0	0	0	0	4.79543e-06	0	0	0	0	0	2.44316e-05	0	0	0	0	0	0	0	4.333e-06	0	0	0	0	0	0	0	0	0	0	0	0	0	0	0.0001326	5.08585e-05	0	5.05285e-06	0	0	0	0	0	0	0	0	0	0	0	0
Otu37014	0	0	0	0	8.15223e-05	9.96274e-06	0	0	0	0	0	0	0	0	0	0	0	5.0804e-06	0	0	0	0	0	0	0	0	0	0	0	0	0	0	0	0	0	0	0	0	0	0	0	0	0	0	0	0	0	0	0
Otu37047	0	0	0	0	9.59085e-06	0	0	4.62246e-06	0	0	0	0	1.84946e-05	4.6243e-06	0	0	0	0	0	0	0	0	0	0	0	0	0	0	0	0	4.96542e-06	0	0	0	0	0	0	0	0	0	3.9982e-05	0	0	0	0	0	0	4.66057e-06	4.74989e-06
Otu37307	0	0	0	0	4.79543e-06	9.96274e-06	5.9522e-06	0	0.000130576	4.73115e-06	1.4659e-05	4.3351e-06	0	4.6243e-06	0	0	0	5.0804e-06	0	4.45012e-06	0	0	0	0	4.73303e-06	0	0	0	0	0	0	1.43425e-05	0	2.84142e-05	5.08585e-06	0	5.05285e-06	0	1.01379e-05	0	4.99775e-06	0	0	0	8.96716e-06	5.02828e-06	0	1.86423e-05	0
Otu37552	9.26359e-06	0	0	0	4.79543e-06	0	0	0	0	4.73115e-06	0	0	4.62366e-06	4.6243e-06	0	0	0	8.12864e-05	0	0	0	0	0	0	9.46607e-06	0	0	0	0	0	0	0	0	0	0	0	1.01057e-05	4.96231e-06	5.06894e-06	4.77952e-06	9.9955e-06	0	0	0	0.000161409	5.02828e-06	4.79614e-06	4.66057e-06	0
Otu376721	0	0	0	0	0	0	0	0	9.32684e-06	0	0	0	0	0	0	0	0	0	0	0	0	0	0	0	0	0	0	0	5.9489e-05	0	0	0	0	0	0	0	0	0	0	0	0	0	0	0	0	0	0	0	0
Otu37802	0	0	0	0	1.43863e-05	4.98137e-06	0	0	0	4.73115e-06	0	0	0	0	2.21115e-05	0	0	1.52412e-05	4.333e-06	0	0	0	0	0	4.73303e-06	0	0	0	0	0	4.96542e-06	4.30276e-05	4.74172e-06	0	0	0	0	0	6.58962e-05	4.77952e-06	0	0	9.69246e-06	0	8.96716e-06	0	0	0	4.74989e-06
Otu37810	0	0	0	0	0	1.49441e-05	0	0	4.66342e-06	0	9.77264e-06	8.67021e-06	0	4.6243e-06	0	0	4.61072e-06	1.01608e-05	4.333e-06	0	0	0	4.93029e-06	0	4.73303e-06	0	0	0	0	0	0	0	0	0	0	9.09558e-06	5.05285e-06	0	0	0	0	9.15076e-06	4.84623e-06	0	0	5.02828e-06	4.79614e-06	4.66057e-06	9.49979e-06
Otu37969	1.38954e-05	0	4.28951e-05	0	2.87726e-05	2.98882e-05	1.78566e-05	4.62246e-06	0	3.31181e-05	4.88632e-06	1.30053e-05	1.84946e-05	4.6243e-06	2.21115e-05	4.45458e-06	2.30536e-05	0.000187975	0	4.45012e-06	0	0	0	0	1.89321e-05	4.67347e-06	0	0	0	0	9.93083e-06	4.78085e-06	0	2.84142e-05	1.52575e-05	0	0	4.96231e-06	6.08273e-05	4.77952e-06	1.9991e-05	2.74523e-05	9.69246e-06	0	0.00011209	1.00566e-05	0	3.2624e-05	4.74989e-06
Otu37972	0	0	0	0	4.79543e-06	4.98137e-06	0	4.62246e-06	5.12976e-05	0	1.4659e-05	0	0	0	4.42229e-06	0	0	0	4.333e-06	0	0	0	0	0	0	0	0	0	0	0	0	0	0	0	0	0	0	4.96231e-06	1.01379e-05	1.43386e-05	0	0	0	0	0	5.02828e-06	0	0	0
Otu380295	0	0	0	0	0	0	0	0	0	0	0	0	0	0	0	0	4.61072e-06	0	0	0	0	0	0	0	0	0	0	0	0	0	0	0	0	0	0	0	0.00024759	0	0	0	0	0	0	0	0	0	0	0	0
Otu38133	0	0	9.53225e-06	0	4.79543e-06	4.98137e-06	5.9522e-06	0	0	0	0	0	0	1.84972e-05	1.76892e-05	0	0	0	4.333e-06	4.45012e-06	0	0	0	0	0	0	0	0	0	0	0	0	0	4.7357e-06	5.08585e-06	4.54779e-06	0	0	0	0	0	9.15076e-06	4.84623e-06	0	0	1.00566e-05	0	4.66057e-06	0
Otu38251	0	0	4.76613e-06	0	0	4.98137e-06	0	0	0	0	0	4.3351e-06	0	0	0	4.45458e-06	0	3.55628e-05	0	0	0	0	0	0	0	0	0	0	0	0	0	0	0	0	0	0	0	0	0	0	0	9.15076e-06	0	0	1.34507e-05	0	0	0	0
Otu3839	4.6318e-06	0	4.76613e-06	0	9.59085e-06	4.98137e-06	0	0	0	0.000108817	0	8.67021e-06	0	0	7.96013e-05	0	0	1.01608e-05	4.333e-06	8.90024e-06	0	0	0	0	0	0	0	0	0	0	0	9.56169e-06	0	4.7357e-06	5.08585e-06	0	0	4.96231e-06	4.56204e-05	4.77952e-06	0.000109951	9.15076e-06	5.81547e-05	0	0	0	0	0	0
Otu386	2.77908e-05	0.000164584	0.000128685	0	0.000354862	0.016852	0.000238088	7.39594e-05	0.00541423	0.000279138	3.90906e-05	4.3351e-06	0.000314409	2.31215e-05	2.65338e-05	0	0.000414965	9.14472e-05	0.000359639	0.00155754	2.52547e-05	2.74728e-05	0.000640937	0.000843175	0.000151457	0.000116837	0	4.95317e-06	0	4.8144e-06	0	4.78085e-06	0	0.000222578	0.00104768	0	6.06342e-05	0.000173681	0.000268654	9.55904e-06	1.9991e-05	9.15076e-06	0.000581547	0	0.00514267	0.000331867	6.23498e-05	1.86423e-05	6.64985e-05
Otu38750	9.26359e-06	0	9.53225e-06	0	0	2.49068e-05	0	4.62246e-06	0	4.73115e-06	0	1.30053e-05	4.62366e-06	4.6243e-06	4.42229e-06	0	9.22143e-06	5.0804e-06	0	7.12019e-05	5.05094e-06	0	0	0	0	0	0	0	1.98297e-05	0	0	4.78085e-06	4.74172e-06	9.4714e-06	1.52575e-05	0	0	0	1.01379e-05	0	0	4.57538e-06	0	0	0.00077566	0	0	4.19451e-05	0
Otu39185	0	0	0	0	0	0	0	4.62246e-06	9.32684e-06	4.73115e-06	0	0	0	0	0.000331672	0	0	0	0	0	0	0	0	0	0	4.67347e-06	0	0	0	0	0	0	0	0	5.08585e-06	0	5.05285e-06	0	0	0	4.99775e-06	0	0	0	0	0	0	0	0
Otu3921	0	0	0	0	0	0.000119553	0	0	0	1.41935e-05	0	0	0	0	0	0	0	0	0	0	0	0	0	0	0	0	0	0	0	0	0	0	0	0	0	0	0	4.96231e-06	0	0	0	0	0	0	0	0	0	0	0
Otu3944	4.6318e-06	0	0	0	1.91817e-05	9.96274e-06	0	0	0	0	4.88632e-06	0	0	0	0.00015478	0	0	0	0	0	0	0	0	0	0	0	0	0	0	0	0	0	0	0	0	0	0	0	0	0	0	0	0	0	0	0	4.79614e-06	0	0
Otu40175	4.6318e-06	0	0	0	9.59085e-06	3.48696e-05	0	0	4.66342e-06	4.73115e-06	4.88632e-06	0	0	0	8.84459e-06	0	4.61072e-06	3.04824e-05	1.2999e-05	0	4.04075e-05	0	1.47909e-05	0	4.73303e-06	1.40204e-05	0	0	4.95742e-06	0	0	4.78085e-06	4.74172e-06	0	0	0	5.05285e-06	0	0	4.77952e-06	0	1.37261e-05	0	0	0	1.00566e-05	4.79614e-06	1.86423e-05	0.000365742
Otu41728	0	0	0	0	0	0	0	0	0	0	0	4.3351e-06	0	0	0	0	0	0	0	4.45012e-06	0	0	0	0	4.73303e-06	0	0	0	0	0	0	0	0	0	0	0	1.01057e-05	0	1.01379e-05	0	0	0	0	0	0	0	0	5.59268e-05	0
Otu41937	4.6318e-06	0	0	0	4.79543e-06	0	0	0	0	0	0	8.67021e-06	0	9.2486e-06	0	0	4.61072e-06	5.0804e-06	0	0	0	0	0	0	4.73303e-06	0	0	0	0	0	0	4.78085e-06	0	4.7357e-06	5.08585e-06	4.54779e-06	6.56871e-05	0	0	4.77952e-06	0	0	0	0	0	0	0	0	0
Otu419568	0	0	0	0	0	0	0	0	0	0	0	0	0	0	0	0	0	0	0	0	0	0	0	0	0	0	0	0	0	0	0	0	0	0	0	0	0	0	0	0	0	0	0	0	0	0	0	0	0
Otu429	0	0	0	0	0.00023018	0	1.19044e-05	0	0	0	0	0	0	0	0	0	0	0	0	0	0	0	0	0	0	0	0	0	0	0	0	0	0	0	0	0	0	0	0	0	0	0	0	0	0	0	0	0	0
Otu42992	0	0	0	0	0	0	0	0	0.000326439	0	0	0	0	0	0	0	0	0	0	0	0	0	0	0	0	0	0	0	0	0	0	0	0	0	0	0	0	0	0	0	0	0	0	0	0	0	0	4.66057e-06	0
Otu4342	0	9.68139e-06	4.76613e-06	0	4.79543e-06	0	0	0	4.66342e-06	0	0	0	0	0	0	0	0	1.01608e-05	0	0	0	0	0	5.11015e-06	0	0	0	0	0	0	0	0	0	0	0	0	0	0	0	0	0	0	0	0	0	5.02828e-06	0	0	0
Otu446245	0	0	0	0	0	9.96274e-06	0	0	0.000144566	0	0	4.3351e-06	0	0	0	0	0	0	0	0	0	0	0	5.11015e-06	0	0	0	0	0	0	0	0	0	0	0	0	0	0	0	0	0	0	0	0	0	0	0	0	0
Otu44764	0	0	0	0	0	0	0.000154757	0	0	0	0	0	0	0	0	0	0	5.0804e-06	4.333e-06	0	0	0	0	0	0	0	0	0	0	0	4.96542e-06	4.78085e-06	0	0	0	0	0	0	0	0	0	0	0	0	0	0	0	0	0
Otu466481	0	0	0	0	0	0	0	0	0	0	0	0	0	0	0	0	0	0	0	0	0	0	0	0	0	0	0	0	0	0	0	0	0	0	0	0	0	0	0	0	0	0	0	0	0	0	0	0	0
Otu496570	0.000120427	0	0	0	0	0	0	0	0	0	0	0	0	0	0	0	0	0	0	0	0	0	0	0	0	0	0	0	0	0	0	0	0	0	0	0	0	0	0	0	0	0	0	0	0	0	0	0	0
Otu496571	0	0	0	0	0	0	0	0	0	0	0	0	0	0	0	0	0	0.00012193	0	0	0	0	0	0	0	0	0	0	0	0	0	0	0	0	0	0	0	0	0	0	0	0	0	0	0	0	0	0	0
Otu50418	0	0	0	0	0	8.46833e-05	0	0	0	4.73115e-06	0	0	0	0	0	0	0	5.0804e-06	0	0	0	0	0	0	0	0	0	0	0	0	0	0	0	0	0	0	0	0	0	4.77952e-06	0	0	0	0	0	0	4.79614e-06	0	0
Otu50473	0	0	4.76613e-06	0	0	4.98137e-06	0	0	4.66342e-06	0	0	1.30053e-05	0	0	4.42229e-06	0	4.61072e-06	0	0	1.78005e-05	0	0	0	0	9.46607e-06	4.67347e-06	4.47852e-06	0	0	0	0	0	0	0	0	0	1.01057e-05	0	0	4.77952e-06	4.99775e-06	0	0	0	0	5.02828e-06	0	1.86423e-05	0
Otu50580	0	0	0	0	0	0	5.9522e-06	0	0	0	0	0	0	0	0	0	0	0	0	0	0	0	0	0	0	0	0	0	0	0	0	0	0	0	0	0	0	0	0	0	0	0	5.81547e-05	0	0	0	0	0	0
Otu51459	0	0	0	0	0	0	0	0	0	0	0	1.30053e-05	0	0	0	1.33637e-05	4.61072e-05	1.01608e-05	0	0	0	0	0	0	0	0	0	0	4.95742e-06	0	0	1.91234e-05	0	9.4714e-06	0	0	0	0	0	0	4.99775e-06	0	0	0	0	0	0	0	0
Otu514710	0	0	0	0	0	0	0	0	0	0	0	0	0	0	0	0	0	0	0	0	0	0	0	0	0	0	0	0	0	0	0	0	0	0	0	0	0	0	0	0	0	0	0	0	0	0	0	0	0
Otu516127	0	0	0	0	0	0	0	0	0	0	0	0	0	0	0	0	0	0	0	0	0	0	0	0	0	0	0	0	0	0	0	0	0	0	0	0	0	0	0	0	0	0	0	0	0	0	0	0	0
Otu516128	0	0	0	0	0	0	0	0	0	0	0	0	0	0	0	0	0	0	0	0	0	0	0	0	0	0	0	0	0	0	0	0	0	0	0	0	0	0	0	0	0	0	0	0	0	0	0	0	0
Otu516132	0	0	0	0	0	0	9.52353e-05	0	0	0	0	0	0	0	0	0	0	0	0	0	0	0	0	0	0	0	0	0	0	0	0	0	0	0	0	0	0	0	0	0	0	0	0	0	0	0	0	0	0
Otu517664	0	0	0	0	0	0	0	0	0	0	0	0	0	0	0	0	0	0	0	0	0	0	0	0	0	0	0	0	0	0	0	0	0	0	0	0	0	0	0	0	0	0	0	0	0	0	0	0	0
Otu517668	0	0	0	0	0	0	0	0	0	0	0	0	0	0	0	0	0	0	0	0	0	0	0	0	0	0	0	0	0	0	0	0	0	0.000194164	0	0	0	0	0	0	0	0	0	0	0	0	0	0	0
Otu518379	0	0	0	0	0	0	0	0	0	0	0	0	0	0	0	0	0	0	0	0	0	0	0	0	0	0	0	0	0	0	0	0	0	0	0	0	0	0	0	0	0	0.0002974	0	0	0	0	0	0	0
Otu518381	0	0	0	0	0	0	0	0	0	0	0	0	0	0	0	0	0	0	0	0	0	0	0	0	0	0	0	0	0	0	0	0	0	0	0	0	0	0	0	0	0	0	5.33085e-05	0	0	0	0	0	0
Otu51840	0	0	0	0	1.91817e-05	8.96647e-05	0	0	0	2.36558e-05	0	0	0	0	1.32669e-05	0	4.61072e-06	0.000147332	0	0	0	0	0	5.11015e-06	2.36652e-05	0	0	0	0	0	0	0	0	4.7357e-06	0	0	0	0	0	0	0	4.57538e-06	0	0	2.24179e-05	0	0	0	0
Otu518958	0	0	0	0	0	0	0	0	0	0	0	0	0	0	0	0	5.53286e-05	0	0	0	0	0	0	0	0	0	0	0	0	0	0	0	0	0	0	0	0	0	0	0	0	0	0	0	0	0	0	0	0
Otu519541	0	0	0	0	0	0	0	0	0	0	0	0	0	0	0	0	0	0	0	0	0	0	0	0	0	0	0	0	0	0	0	0.000143425	0	0	0	0	0	0	0	0	0	0	0	0	0	0	0	0	0
Otu519545	0	0	0	0	0	0	0	0	0	0	0	0	0	0	0	0	0	0	0	0	0	0	0	0	0	0	0	0	0	0	0	0	0	0	0	0	0	0.000114133	0	0	0	0	0	0	0	0	0	0	0
Otu520	0	0	0	0	4.79543e-06	0	0	0	0	0	0	0	0	0	0	0	0	0	0	0	0	0	0	0	0	0	0	0	0	0	0	0	0	0	0	0	0	0	0	0	0	0	0	0	0	0	0	0	0.000137747
Otu520636	0	0	0	0	0	0.000234124	0	0	0	0	0	0	0	0	0	0	0	0	0	0	0	0	0	0	0	0	0	0	0	0	0	0	0	0	0	0	0	0	0	0	0	0	0	0	0	0	0	0	0
Otu522104	0	0	0	0	0	0	0	0	0	0	0	0	0	0	0	0	0	0.000101608	0	0	0	0	0	0	0	0	0	0	0	0	0	0	0	0	0	0	0	0	0	0	0	0	0	0	0	0	0	0	0
Otu525386	0	0	0	0	0	0	0	0	0	0	0	0	0	0	0	0	0	0	0	0	0	0	0	0	0	0	0	0	0	0	0	0	0	0	0	0	0	0	0	0	0	0	0	0	0	0	0	0	0
Otu53613	0	0	0	0	0	0	0	0	0	9.4623e-06	0	0	0	0	4.42229e-06	4.45458e-06	4.61072e-06	0	0	0.000106803	0	0	0	0	1.41991e-05	4.67347e-06	0	0	0	0	0	0	0	0	0	0	0	4.96231e-06	0	0	0	4.57538e-06	0	0	0	0	0	0	0
Otu53940	4.6318e-06	0	0	0	1.43863e-05	0.000602746	8.92831e-05	3.23572e-05	0	0	1.4659e-05	8.67021e-06	4.62366e-06	0	5.30675e-05	0	4.61072e-06	0.00012193	8.666e-06	0	0	0	0	0	9.46607e-06	0	0	0	0	0	0	0	0	3.78856e-05	5.08585e-06	0	1.01057e-05	0	1.01379e-05	0	4.99775e-06	1.83015e-05	4.84623e-06	0	1.79343e-05	1.00566e-05	4.79614e-06	9.32114e-06	4.74989e-06
Otu5544	0	0	0	0	0	0	0	0	0	0	0	4.3351e-06	0	0	0	0	0	0	0	0	0	0	0	0	0	0	0	0	0	0	0	0	0	0	0	0	0	0	2.02758e-05	0	0	0	0	0	0	0	0	0	0
Otu55935	0	0	0	0	0	0	0	0	0	0	0	0	0	0	0	0	0	0	0	4.45012e-06	0	0	0	0	0	0	0	0	0	0	0	0	0	0	0	0	0	0	1.01379e-05	0.000152945	0	0	0	0	0	0	4.79614e-06	1.39817e-05	0
Otu56764	0	0	5.71935e-05	0	0	0	0	0	0	0	0	0	0	0	0	0	0	5.0804e-06	0	4.45012e-06	0	0	0	0	4.73303e-06	0	0	0	0	0	0	0	0	0	0	0	5.05285e-06	0	0	0	0	0	0	0	0	0	0	0	0
Otu57848	0	0	0	0	4.79543e-06	0	0	0	0	0	0	0	0	0	0	4.45458e-06	0	0	0	0	0	0	0	0	0	0	0	0	0	0	0	0	0	4.7357e-06	0	0	0	0	0	0	0	0	0	0	0	0	4.79614e-06	0	0
Otu58947	4.6318e-06	0	0	0	0	0.000114572	0	0	8.39415e-05	0	0	0	0	0	9.72905e-05	0	0	0	0	0	0	0	0	0	4.73303e-06	0	0	0	0	0	0	0	0	0	0	0	0	0	0	0	0	0	0	0	0	0	0	0	0
Otu59472	0	0	0	0	4.79543e-06	0.000358659	0	0	0	1.89246e-05	0	0	0	0	0	0	0	0	0	0	0	0	0	0	2.36652e-05	4.67347e-06	0	0	0	0	0	0	0	0	0	0	0	0	0	0	0	9.15076e-06	0	0	1.34507e-05	5.02828e-06	0	0	0
Otu61370	0	0	1.42984e-05	0	9.59085e-06	9.96274e-06	5.9522e-06	0	4.66342e-06	0	4.88632e-06	0	0	0	4.42229e-06	0	0	3.55628e-05	0	0	0	0	0	0	0	0	8.95704e-06	0	0	0	4.96542e-06	0	0	0	0	4.54779e-06	1.01057e-05	1.48869e-05	0	0	0	4.57538e-06	0	0	4.48358e-06	0	0	0	0
Otu61544	0	0	0	0	0	4.98137e-06	0	0	0	0	0	8.67021e-06	0	0	3.09561e-05	0	4.61072e-06	5.0804e-06	0	0	0	0	0	0	0	0	4.47852e-06	0	0	0	0	0	0	4.7357e-06	5.08585e-06	0	5.05285e-06	0	5.06894e-06	0	0	0	4.84623e-06	4.74442e-06	3.13851e-05	0	0	9.32114e-06	0
Otu62127	0	0	0	0	0	0	0	9.24492e-06	0	0	0	0	0	0	0	0	0	0	0	4.45012e-06	0	0	0	0	9.93937e-05	0	0	0	0	0	0	0	0	4.7357e-06	0	0	5.05285e-06	0	0	0	0	0	0	0	0	0	0	0	0
Otu6398	0	2.90442e-05	0	0	2.39771e-05	3.9851e-05	5.9522e-06	0	4.66342e-06	9.4623e-06	0	8.67021e-06	0	4.6243e-06	3.09561e-05	0	0	4.57236e-05	0	0	0	0	0	1.02203e-05	9.46607e-06	0	0	0	0	0	0	0	0	0	0	0	0.000757928	4.96231e-06	5.06894e-06	0	1.49933e-05	0	0	0	0	0	0	0	0
Otu64204	0	0	0	0	0	0	0	0	0	0.000454191	0	0	0	0	0	0	0	0	0	0	0	0	0	0	0	0	0	0	0	0	0	0	0	0	0	0	0	0	0	0	0	0	0	0	0	0	0	0	0
Otu64359	0	0	2.38306e-05	0	4.79543e-06	8.96647e-05	0	0	4.66342e-06	5.20427e-05	0	0	9.24731e-06	2.77458e-05	4.42229e-06	4.45458e-06	1.38322e-05	0	0	0	0	0	2.95817e-05	1.53304e-05	9.46607e-06	0	0	0	4.95742e-06	0	0	0	0	0	5.08585e-06	0	2.02114e-05	0	0	4.77952e-06	0	4.57538e-06	4.84623e-06	0	0	5.02828e-06	0	6.5248e-05	9.49979e-06
Otu64377	4.6318e-06	1.45221e-05	9.53225e-06	0	2.39771e-05	4.48323e-05	2.38088e-05	0	0	9.4623e-06	0	0	0	0	0	0	4.61072e-06	4.06432e-05	0	4.45012e-06	0	0	4.93029e-06	0	0	0	0	0	4.95742e-06	0	4.96542e-06	4.78085e-06	0	4.7357e-06	0	0	2.02114e-05	0	1.52068e-05	0	4.99775e-06	4.57538e-06	0	0	4.03522e-05	0	0	0	5.22488e-05
Otu64386	2.3159e-05	0	0	0	4.79543e-06	4.98137e-06	0	0	0	4.73115e-06	4.88632e-06	1.30053e-05	0	4.6243e-06	0	0	0	5.0804e-06	0	4.45012e-06	0	0	4.93029e-06	0	4.73303e-06	0	0	0	0	0	4.96542e-06	0	0	2.36785e-05	0	0	1.01057e-05	0	0	0	4.99775e-06	9.15076e-06	0	0	0	0	0	9.32114e-06	0
Otu64455	0	0	0	0	0	0	0	0	0	0	0	0	0	0	0	0	0	0	1.7332e-05	0	0	0	0	0	0	0	0	0	0	0	0.000143997	1.43425e-05	0	0	0	0	0	0	0	0	0	0	0	0	0	0	4.79614e-06	0	0
Otu64656	4.6318e-06	0	0	0	1.91817e-05	0	5.9522e-06	0	0	0	0	0	0	0	0	0	0	1.52412e-05	0	0	0	0	0	0	9.46607e-06	0	0	0	0	0	0	0	0	0	0	0	0	0	0	0	0	0	0	0	1.34507e-05	0	0	0	0
Otu64790	9.26359e-06	4.84069e-06	9.53225e-06	0	1.43863e-05	7.47205e-05	5.9522e-06	4.62246e-05	0	0.000184515	0	2.16755e-05	0	4.6243e-06	0.000199003	8.90916e-06	9.22143e-06	2.5402e-05	4.333e-06	0	0	0	0	5.11015e-06	0.000170389	0	8.95704e-06	0	4.95742e-06	0	4.96542e-06	9.56169e-06	0	3.78856e-05	4.06868e-05	0	6.06342e-05	0	0	5.25747e-05	2.49888e-05	9.15076e-06	0	0	4.03522e-05	0	4.79614e-06	9.32114e-06	4.2749e-05
Otu65266	0	0	0	4.64074e-06	0	9.96274e-06	0	0	4.66342e-06	4.73115e-06	0	1.30053e-05	4.62366e-06	0	4.42229e-06	0	0	2.03216e-05	0	0	0	0	4.93029e-06	0	0	0	0	0	0	0	4.96542e-06	0	0	0	5.08585e-06	0	0	0	1.01379e-05	1.91181e-05	0	4.57538e-06	0	0	4.03522e-05	0	0	9.32114e-06	0
Otu65656	0	0	1.90645e-05	0	0	4.98137e-05	5.9522e-06	0	1.39903e-05	0	0	0	9.24731e-06	2.31215e-05	5.30675e-05	0	0	0	0	0	0	0	0	0	9.46607e-06	0	0	0	9.91483e-06	0	0	4.78085e-06	0	0	1.52575e-05	0	4.54757e-05	4.96231e-06	5.06894e-06	0	0	0	0	0	1.79343e-05	0	0	1.39817e-05	0
Otu65981	0	9.68139e-06	0	0	0	9.96274e-06	1.78566e-05	0	9.32684e-06	0	4.88632e-06	4.3351e-06	0	9.2486e-06	8.84459e-06	0	0	0	4.333e-06	4.45012e-06	0	0	0	0	1.89321e-05	0	0	0	0	0	0	0	0	9.4714e-06	0	0	5.05285e-06	0	0	0	0	1.83015e-05	0	0	4.48358e-06	0	0	1.39817e-05	0
Otu66384	0	0	0	0	0	0	0	0	4.66342e-06	0	9.77264e-06	0	0	0	0	0	0	0	0	0	0	0	0	0	0	0	0	0	0	0	0	0	0	0	0	0	0	0	0	0	0	0	0	0	0	0	0	0	0
Otu66481	4.6318e-06	0	4.76613e-06	0	4.79543e-06	9.96274e-06	0	0	0	0	0	1.30053e-05	0	4.6243e-06	8.84459e-06	8.90916e-06	1.38322e-05	0	4.333e-06	8.90024e-06	0	0	0	3.5771e-05	4.73303e-06	0	0	0	0	0	9.93083e-06	9.56169e-06	0	0	5.08585e-06	0	2.02114e-05	0	2.02758e-05	4.77952e-06	0	9.15076e-06	0	0	1.34507e-05	0	0	1.39817e-05	0
Otu674	0	0	0	0	0	0	5.9522e-06	0	0	0	0	0	0	0	0	0	0	0	0	0	0	0	0	0	0	0	0	0	0	0	4.96542e-06	0	4.74172e-06	0	0	0	0	0	0	0	0	0	0	0	0	0	0	0	0
Otu70810	0	0	0	0	0	0	0	0	0	0	0	0	0	5.54916e-05	0	0	4.61072e-06	0	0	0	0	0	0	0	0	0	0	0	0	0	0	0	0	1.42071e-05	0	0	0	0	0	0	0	0	0	0	0	0	0	0	0
Otu7327	0	0	0	0	0	0	0	0	0	0	0	0	0	0	0	0	0	0	0	0	0	0	0	0	0	0	0	0	0	0	0	0	0	0	0	0	0	0	0	0	0	0	4.84623e-06	0	0	0	0	0	0
Otu78233	0	0	0	0	0	1.99255e-05	5.9522e-06	0	0	4.73115e-06	0	0	0	0	4.42229e-06	0	0	0	0	0	0	0	0	0	5.67964e-05	0	0	0	0	0	0	0	0	4.7357e-06	5.08585e-06	0	0	0	0	0	0	0	0	0	0	0	0	0	0
Otu79103	0	0	4.76613e-06	0	4.31588e-05	2.98882e-05	5.9522e-06	0	4.66342e-06	1.89246e-05	0	4.3351e-06	0	0	4.42229e-06	0	9.22143e-06	3.04824e-05	4.333e-06	0	0	0	0	1.02203e-05	1.89321e-05	0	0	0	9.91483e-06	0	0	0	0	4.7357e-06	3.05151e-05	0	2.52643e-05	4.96231e-06	6.08273e-05	4.77952e-06	4.99775e-06	0	0	0	4.48358e-06	0	0	1.86423e-05	0
Otu81099	0	0	0	0	1.43863e-05	9.96274e-06	0	0	0	0	0	4.3351e-06	0	0	0	0	0	5.0804e-06	0	0	0	0	0	0	4.73303e-06	0	0	0	0	0	0	0	0	0	0.000101717	0	0	0	2.02758e-05	0	0	0	0	0	0	0	0	0	0
Otu82905	0	0	0	0	0	0	1.78566e-05	0	0	0	0	0	9.24731e-06	0	5.30675e-05	0	0	0	0	0	0	0	0	0	9.46607e-06	0	0	0	0	0	0	0	0	0	0	0	0	0	0	0	0	0	0	0	0	0	0	4.66057e-06	0
Otu834	0	0	0	4.64074e-06	0.000378839	0	0	0	0	0	0	0	0	0	0	4.45458e-06	0	0.000558844	0	0.000200255	0	0	0	0	0	0	0	0	0	0	0	0	0	0	0	0	0	0	0	0	0	0	0	0	0	0	0	0	0
Otu83836	0	0	4.76613e-06	0	0	0	0	0	0	0	0	0	0	0	0	0	0	0	0	0	0	0	0	0	0	6.54285e-05	0	0	0	0	0	0	0	0	0	0	0	0	0	0	0	0	0	0	0	0	0	0	0
Otu8565	0	0	0	0	0	0	0	0	0	0	0	0	0	0	0	0	0	0	0	0	0	0	0	0	0	0	0	0	0	0	0	0	0	0	0	0	0.000116216	0	0	0	0	0	0	0	4.48358e-06	0	0	0	0
Otu91501	1.38954e-05	0	1.90645e-05	0	1.91817e-05	1.99255e-05	4.16654e-05	1.38674e-05	0	9.4623e-06	2.44316e-05	1.73404e-05	4.62366e-06	2.31215e-05	3.09561e-05	0	0	1.01608e-05	0	1.33504e-05	0	0	4.93029e-06	5.11015e-06	0	0	4.47852e-06	0	0	0	0	0	0	4.7357e-06	1.52575e-05	0	1.01057e-05	0	0.000106448	0	1.49933e-05	2.28769e-05	0	0	6.27701e-05	0	4.79614e-06	1.86423e-05	3.79992e-05
Otu928	0	0	0	0	0	0	0	0.000457624	0	0	0	0	0	0	0	0	0	0	0	0	0	0	0	0	0	0	0	0	0	0	0	0	0	0	0	0	0	0	0	0	0	0	0	0	0	0	0	0	0
Otu93219	0	0	0	0	0	0.000209218	0	0	0	1.89246e-05	0	0	0	0	4.42229e-06	0	0	5.0804e-06	0	0	0	0	4.93029e-06	0	2.83982e-05	0	8.95704e-06	0	0	0	0	0	0	4.7357e-06	5.08585e-06	0	5.05285e-06	0	5.06894e-06	9.55904e-06	0	0	0	0	8.96716e-06	5.02828e-06	0	0	0
Otu94097	0	0	3.8129e-05	0	4.79543e-06	1.99255e-05	0.000851165	0.000124806	4.66342e-06	6.62361e-05	0	0	0	0	1.76892e-05	0	0	0	4.333e-06	0.000440562	0	0	0	0	1.41991e-05	4.67347e-06	0	0	0	0	0	0	0	0	0	0	4.04228e-05	0	0	0	4.99775e-06	4.57538e-06	0	0	4.48358e-06	0	0	0	0
Otu947	0	0	0	0	4.79543e-06	1.49441e-05	0	0.000124806	0	0	0	4.3351e-06	0	0	3.53783e-05	0	0	0	0	0	0	0	0	0	0	0	0	0	0	0	0	0	0	9.4714e-06	0	0	0	0	0	0	0	4.57538e-06	0	0	3.13851e-05	0	0	4.66057e-06	0
Otu95107	0	0	0	0	1.43863e-05	0	5.35698e-05	0	0	4.73115e-06	4.88632e-06	4.3351e-06	0	0	4.42229e-06	0	0	7.6206e-05	4.333e-06	4.45012e-06	0	0	0	5.11015e-06	4.73303e-06	0	0	0	0	0	4.96542e-06	0	0	9.4714e-06	0	0	5.05285e-06	0	0	4.77952e-06	0	4.57538e-06	1.45387e-05	0	6.72537e-05	5.02828e-06	0	2.79634e-05	4.74989e-06
Otu95126	4.6318e-06	4.84069e-06	2.38306e-05	4.64074e-06	9.59085e-06	6.47578e-05	1.19044e-05	4.62246e-06	0	4.73115e-06	0	4.3351e-06	0	0	6.63344e-05	0	0	2.03216e-05	1.2999e-05	4.45012e-06	5.05094e-06	4.5788e-06	0	0	0	0	8.95704e-06	0	4.95742e-06	0	4.96542e-06	0	0	0	0	0	5.05285e-06	9.92462e-06	0	4.77952e-06	0	9.15076e-06	0	0	1.79343e-05	0	0	0	0
Otu95459	9.26359e-06	4.84069e-06	0	2.78444e-05	2.39771e-05	1.49441e-05	1.78566e-05	1.84898e-05	1.86537e-05	4.73115e-06	1.4659e-05	0.000117048	3.23656e-05	9.71103e-05	8.84459e-06	8.90916e-06	1.84429e-05	0	0.000116991	8.90024e-06	5.05094e-06	4.5788e-06	0	0	9.46607e-06	1.40204e-05	1.34356e-05	0	9.91483e-06	0	0.00011917	9.08361e-05	9.00927e-05	9.4714e-05	3.56009e-05	0	6.06342e-05	0	1.52068e-05	5.25747e-05	4.99775e-05	9.15076e-06	3.39236e-05	0	1.34507e-05	2.51414e-05	4.79614e-06	1.39817e-05	9.49979e-06
Otu95619	4.6318e-06	0	9.53225e-06	0	1.91817e-05	1.49441e-05	7.73786e-05	4.62246e-06	0	3.31181e-05	0	8.67021e-06	1.3871e-05	4.6243e-06	0	8.90916e-06	0	0.000142251	0	4.45012e-06	0	0	4.93029e-06	1.02203e-05	4.25973e-05	0	8.95704e-06	0	1.98297e-05	0	0	1.43425e-05	0	4.7357e-06	1.01717e-05	0	6.56871e-05	0	2.02758e-05	1.43386e-05	9.9955e-06	4.57538e-05	9.69246e-06	0	8.96716e-06	9.05091e-05	0	9.32114e-06	0
Otu9611	0	0	0	0	0	4.98137e-06	5.9522e-06	0	0	0	0	4.3351e-06	0	0	8.84459e-06	0	0	0	0	0	0	0	0	0	0.000123059	0	0	0	0	0	0	0	0	0	0	0	0	0	0	0	0	0	0	0	0	0	0	0	4.74989e-06
Otu96231	0	0	0	0	0	0	0	0	0	0.00012301	0	0	0	0	0	0	0	0	0	0	0	0	0	0	0	0	0	0	0	0	0	0	0	0	0	0	0	0	0	0	0	0	0	0	0	0	0	9.32114e-06	0
Otu96479	0	0	0	0	9.59085e-06	9.96274e-06	0	0	1.39903e-05	0	9.77264e-06	1.30053e-05	0	0	4.42229e-06	4.45458e-06	4.61072e-06	0	1.2999e-05	8.90024e-06	0	0	0	0	2.83982e-05	4.67347e-06	0	0	4.95742e-06	0	0	4.78085e-06	0	4.7357e-06	0	0	0	4.96231e-06	5.06894e-06	0	0	0	0	0	0	5.02828e-06	9.59228e-06	9.32114e-06	4.74989e-06
Otu96991	0	0	0	0	4.79543e-06	4.98137e-06	0	4.62246e-06	0	0	0	8.67021e-06	0	4.6243e-06	0	0	0	0	0	8.90024e-06	0	0	0	0	2.36652e-05	0	0	0	0	0	0	0	0	9.4714e-06	0	0	1.01057e-05	0	1.01379e-05	9.55904e-06	0	6.86307e-05	0	0	0	5.02828e-06	0	9.32114e-06	0
Otu98618	4.6318e-06	0	0	0	4.79543e-06	0	0	0	9.32684e-06	1.41935e-05	0	0	0	0	0	4.45458e-06	9.22143e-06	1.01608e-05	4.333e-06	4.45012e-06	0	0	0	0	1.41991e-05	0	0	0	0	0	0	9.56169e-06	0	9.4714e-06	0	0	5.05285e-06	9.92462e-06	0	0	9.9955e-06	9.15076e-06	9.69246e-06	0	4.48358e-06	1.00566e-05	0	2.79634e-05	9.49979e-06
Otu98911	4.6318e-06	0	9.53225e-06	0	9.59085e-06	9.96274e-06	1.19044e-05	0	0	4.73115e-06	0	4.3351e-06	4.62366e-06	0	4.42229e-06	4.45458e-06	4.61072e-06	5.0804e-06	0	4.45012e-06	0	0	0	0	4.73303e-06	0	0	0	0	0	0	0	0	9.4714e-06	0	0	0	0	1.01379e-05	0	0	0	0	0	2.24179e-05	0	0	4.66057e-06	0
Otu996	2.77908e-05	0	0.000214476	0	0	4.98137e-06	0.000410702	0	4.66342e-06	6.1505e-05	0	0.000125718	0.000129462	0	0	0.000142547	0.000331972	8.12864e-05	0.000576289	0.000120153	0	0	0.000152839	3.5771e-05	2.83982e-05	0.000186939	4.47852e-06	0	0.00017351	0	4.46887e-05	0.000363344	0	7.10355e-05	5.08585e-06	0	7.57928e-05	4.96231e-06	7.60341e-05	0.00040148	0.000684692	4.57538e-06	0	0	0.00018831	8.04525e-05	4.79614e-06	0.00355135	0
Otu997	0	9.68139e-06	4.76613e-06	0	1.91817e-05	4.98137e-06	0	4.62246e-06	9.32684e-06	0.000255482	0	0	1.84946e-05	1.84972e-05	3.53783e-05	0	0.000147543	0.000248939	6.9328e-05	4.45012e-06	0	0	0	0	0.000113593	2.33673e-05	0	0	9.91483e-06	0	4.46887e-05	2.39042e-05	4.74172e-06	2.36785e-05	3.05151e-05	4.09301e-05	8.58985e-05	4.96231e-05	0.000121655	4.77952e-06	0	9.15076e-06	0.000106617	0	8.96716e-06	4.52546e-05	0	1.39817e-05	0
Citrobacter	0.00608155	0.000159743	0.00579084	0.00255241	0.00465636	0.0205581	0.0449153	0.00720179	0.208697	0.000591394	0.00664539	0.000793324	0.00359258	0.0132949	0.00494412	0.00110919	0.0110427	0.0835167	0.0013129	0.0257974	0.0234162	0.000549456	0.00554657	0.0228168	0.0015193	0.000205632	0.00304092	0.000173361	0.0016062	0.000168504	0.00319276	0.000411153	9.48344e-06	0.00583912	0.0187617	0.0149486	0.00299634	0.160124	0.014482	0.0014243	0.0115048	0.0050375	0.00252489	0.000564586	0.0221175	0.00989566	0.0124028	0.00110922	0.0066166
Otu13102	0	0	4.76613e-05	0	0	4.98137e-06	0	0	0	0	0	0	0	0	0	0	0	0	0	0	0	0	0	0	0	0	0	0	0	0	0	0	0	0	0	0	0	4.96231e-06	5.06894e-06	0	0	0	0	0	0	0	0	0	0.000132997
Otu14045	0	0	9.53225e-06	0	2.87726e-05	0	3.57132e-05	0	0	0	9.77264e-06	0	0	0	1.32669e-05	0	0	0	0	0	0	0	0	0	0	0	0	0	0	0	0	0	0	4.7357e-06	2.54292e-05	0	0	1.48869e-05	1.52068e-05	1.91181e-05	0	0	0	0	8.96716e-06	0	0.000129496	0	0
Otu66	0.00608155	0.000159743	0.00573365	0.00255241	0.00462759	0.0205531	0.0448796	0.00720179	0.208697	0.000591394	0.00663562	0.000793324	0.00359258	0.0132949	0.00493086	0.00110919	0.0110427	0.0835167	0.0013129	0.0257974	0.0234162	0.000549456	0.00554657	0.0228168	0.0015193	0.000205632	0.00304092	0.000173361	0.0016062	0.000168504	0.00319276	0.000411153	9.48344e-06	0.00583438	0.0187363	0.0149486	0.00299634	0.160104	0.0144617	0.00140518	0.0115048	0.0050375	0.00252489	0.000564586	0.0221085	0.00989566	0.0122733	0.00110922	0.00648361
Cronobacter	0.00127374	2.42035e-05	4.28951e-05	0	0.00011509	5.47951e-05	0.00010714	3.23572e-05	0.00017721	3.31181e-05	3.90906e-05	3.03457e-05	8.78495e-05	1.84972e-05	0	4.45458e-06	9.22143e-06	5.0804e-06	1.7332e-05	0.000195805	0	0.00541672	1.47909e-05	1.02203e-05	0	0.000168245	1.34356e-05	0.000153548	3.47019e-05	0	0.00434474	0	0	0.00235838	0	0	7.07399e-05	0.00110163	0	0.000124268	0.000129942	2.28769e-05	3.39236e-05	1.42333e-05	0.000304884	0.000160905	0.000470022	0	6.17486e-05
Otu26392	0	0	0	0	0	0	0	0	0	0	0	0	0	0	0	0	0	5.0804e-06	0	0	0	4.5788e-06	0	0	0	0	0	4.95317e-06	0	0	8.93775e-05	0	0	0	0	0	0	0	0	0	0	0	0	0	0	0	9.59228e-06	0	0
Otu536	0.00127374	0	4.76613e-06	0	0	0	5.9522e-05	2.77348e-05	0	3.31181e-05	0	1.30053e-05	0	1.84972e-05	0	0	0	0	0	0	0	0.00541214	0	0	0	0	0	0	0	0	0.00366448	0	0	0.00227314	0	0	7.07399e-05	0.000585553	0	0	0.000109951	2.28769e-05	0	0	9.41552e-05	0	0.000225419	0	0
Otu989	0	2.42035e-05	3.8129e-05	0	0.00011509	5.47951e-05	4.76176e-05	4.62246e-06	0.00017721	0	3.90906e-05	1.73404e-05	8.78495e-05	0	0	4.45458e-06	9.22143e-06	0	1.7332e-05	0.000195805	0	0	1.47909e-05	1.02203e-05	0	0.000168245	1.34356e-05	0.000148595	3.47019e-05	0	0.000590884	0	0	8.52426e-05	0	0	0	0.00051608	0	0.000124268	1.9991e-05	0	3.39236e-05	1.42333e-05	0.000210728	0.000160905	0.000235011	0	6.17486e-05
Enterobacter	4.16862e-05	1.45221e-05	4.76613e-06	4.64074e-06	0.000124681	0.000184311	0.000148805	1.84898e-05	0.000172546	0	2.93179e-05	2.60106e-05	7.86022e-05	9.2486e-06	4.42229e-06	0	9.22143e-06	0	4.333e-06	5.34014e-05	5.05094e-06	0	0.000216933	0.000183965	9.46607e-06	0.000401918	4.47852e-05	0	6.44464e-05	0	0	0	9.48344e-06	5.68284e-05	5.08585e-05	5.00257e-05	2.52643e-05	6.94724e-05	2.53447e-05	0.000191181	0.000629717	9.15076e-06	2.90774e-05	0	5.3803e-05	2.01131e-05	0.000105515	0	9.0248e-05
Otu1375	0	1.45221e-05	0	4.64074e-06	6.23406e-05	9.96274e-06	5.9522e-05	1.38674e-05	0.000130576	0	4.88632e-06	2.16755e-05	6.93549e-05	4.6243e-06	0	0	0	0	0	8.90024e-06	0	0	0	1.02203e-05	0	0.000229	4.03067e-05	0	5.9489e-05	0	0	0	4.74172e-06	9.4714e-06	2.03434e-05	5.00257e-05	1.51586e-05	0	0	1.43386e-05	3.9982e-05	0	1.45387e-05	0	2.69015e-05	2.01131e-05	0	0	5.22488e-05
Otu14073	3.24226e-05	0	0	0	9.59085e-06	1.99255e-05	5.9522e-06	0	0	0	0	0	0	0	0	0	0	0	0	4.45012e-06	5.05094e-06	0	0.000202142	4.59913e-05	0	0.000154224	0	0	0	0	0	0	4.74172e-06	0	5.08585e-06	0	0	4.96231e-06	0	0	0	0	1.45387e-05	0	0	0	0	0	0
Otu17353	0	0	0	0	0	0	0	0	4.66342e-06	0	0	0	0	0	0	0	0	0	0	0	0	0	0	0	0	0	0	0	0	0	0	0	0	9.4714e-06	0	0	0	4.96231e-06	1.01379e-05	0.000143386	0	0	0	0	0	0	0	0	0
Otu24371	0	0	0	0	9.59085e-06	3.9851e-05	1.78566e-05	0	0	0	0	4.3351e-06	0	0	4.42229e-06	0	0	0	0	4.45012e-06	0	0	0	5.11015e-05	9.46607e-06	0	0	0	0	0	0	0	0	9.4714e-06	2.54292e-05	0	0	1.98492e-05	0	1.43386e-05	6.99685e-05	4.57538e-06	0	0	0	0	0.000100719	0	0
Otu36134	0	0	0	0	0	0.000114572	4.16654e-05	0	0	0	2.44316e-05	0	0	0	0	0	0	0	0	3.5601e-05	0	0	9.86057e-06	4.08812e-05	0	0	0	0	4.95742e-06	0	0	0	0	4.7357e-06	0	0	0	0	5.06894e-06	0	9.9955e-06	0	0	0	1.79343e-05	0	0	0	0
Otu36955	4.6318e-06	0	4.76613e-06	0	2.39771e-05	0	1.19044e-05	4.62246e-06	3.26439e-05	0	0	0	9.24731e-06	4.6243e-06	0	0	9.22143e-06	0	4.333e-06	0	0	0	4.93029e-06	0	0	4.67347e-06	4.47852e-06	0	0	0	0	0	0	1.89428e-05	0	0	0	3.96985e-05	1.01379e-05	1.91181e-05	0	4.57538e-06	0	0	8.96716e-06	0	4.79614e-06	0	3.79992e-05
Otu4559	0	0	0	0	1.91817e-05	0	1.19044e-05	0	0	0	0	0	0	0	0	0	0	0	0	0	0	0	0	5.11015e-06	0	0	0	0	0	0	0	0	0	0	0	0	0	0	0	0	0	0	0	0	0	0	0	0	0
Otu472598	0	0	0	0	0	0	0	0	0	0	0	0	0	0	0	0	0	0	0	0	0	0	0	0	0	0	0	0	0	0	0	0	0	0	0	0	0	0	0	0	0.000109951	0	0	0	0	0	0	0	0
Otu65662	4.6318e-06	0	0	0	0	0	0	0	4.66342e-06	0	0	0	0	0	0	0	0	0	0	0	0	0	0	3.06609e-05	0	1.40204e-05	0	0	0	0	0	0	0	4.7357e-06	0	0	1.01057e-05	0	0	0	0.00039982	0	0	0	0	0	0	0	0
Erwinia	0.00116721	0.00124406	0.000986588	4.64074e-06	0.0152686	0.00123538	0.00887474	0.00508008	0.00509245	1.89246e-05	0.00602972	0.00147394	0.00234419	0.00186822	0.00220672	0.000570186	0.00264194	6.09648e-05	0.000454965	0.00208711	0.00201532	0.000467037	0.00894354	0.0570855	0.00240911	0.00036453	0.00024184	0.000693443	0.000758485	2.88864e-05	0.000297925	4.78085e-05	0	0.00298349	0.000284808	0.00434769	0.00179882	0.0104506	0.0103812	0.00466481	0.0991954	0.00415902	0.00153625	4.26998e-05	0.00247045	0.00154871	0.00327576	0.000904151	0.000759983
Otu204	0.00116721	0.00124406	0.000986588	4.64074e-06	0.0152686	0.00123538	0.00887474	0.00508008	0.00509245	1.89246e-05	0.00602972	0.00147394	0.00234419	0.00186822	0.00220672	0.000570186	0.00264194	6.09648e-05	0.000454965	0.00208711	0.00201532	0.000467037	0.00894354	0.0569679	0.00240911	0.00036453	0.00024184	0.000693443	0.000758485	2.88864e-05	0.000297925	4.78085e-05	0	0.00298349	0.000284808	0.00434769	0.00179882	0.0104506	0.0103812	0.00466481	0.0991954	0.00415902	0.00153625	4.26998e-05	0.00247045	0.00154871	0.00327576	0.000904151	0.000759983
Otu419423	0	0	0	0	0	0	0	0	0	0	0	0	0	0	0	0	0	0	0	0	0	0	0	0.000117533	0	0	0	0	0	0	0	0	0	0	0	0	0	0	0	0	0	0	0	0	0	0	0	0	0
Escherichia/Shigella	0.00548405	0.000513113	0.00431334	3.24852e-05	0.00414325	0.00433379	0.0556352	0.00604156	0.00371208	0.000184515	0.00481791	0.000602579	0.00135936	0.000323701	0.00198119	0.00104237	0.168439	0.000198135	0.000558957	0.00132614	0.00342454	0.000178573	0.000665589	0.0027697	0.00297234	0.00277604	0.000317975	0.000227846	0.00116004	0.000308122	0.000382337	8.12744e-05	3.79337e-05	0.0105701	0.000783221	0.000377467	0.00139964	0.00742858	0.0115318	0.00397178	0.00454296	0.00078239	0.000838398	0.00020401	0.00364515	0.0977549	0.0769109	0.000358864	0.00591837
Otu1002	1.85272e-05	0	1.90645e-05	0	0	0	8.33309e-05	3.23572e-05	0	0	0	0	0	0	0	0	0.000156764	0	0	0	0	0	0	0	0	1.40204e-05	0	0	0	0	0	0	0	6.15641e-05	5.08585e-06	0	0	4.96231e-06	1.52068e-05	0	4.99775e-06	0	0	0	0	0.000201131	0.000100719	0	0
Otu1088	0	0	0	0	0	0	5.35698e-05	0	0	0	0	0	0	0	0	0	1.84429e-05	0	0	0	0	0	0	0	0	0	0	0	0	0	0	0	0	0	0	0	0	0	0	0	0	0	0	0	0	5.02828e-06	9.59228e-06	0	0
Otu124446	0	0	0	0	0	0	0	0	0	0	0	0	0	0	0	0	4.61072e-06	0	0	0	0	0	0	0	0	0	0	0	0	0	0	0	0	0	0	0	0	0	0	0	0	0	0	0	0	0.000105594	0	0	0
Otu153423	0	0	0	0	0	0	5.9522e-06	0	0	0	0	0	0	0	0	0	9.22143e-05	0	0	0	0	0	0	0	0	0	0	0	0	0	0	0	0	0	0	0	0	0	5.06894e-06	0	0	0	0	0	0	2.01131e-05	0	0	0
Otu15568	0	0	0	0	0	0	0.000184518	0	0	0	0	0	0	0	0	0	0	0	0	0	0	0	0	0	4.73303e-06	0	0	0	0	0	0	0	0	0	0	0	0	0	0	0	0	0	0	0	0	0	0	0	0
Otu188653	0	0	0	0	0	0	0	0	0	0	0	0	0	0	0	0	4.61072e-06	0	0	0	0	0	0	0	0	0	0	0	0	0	0	0	0	0	0	0	0	0	0	0	0	0	0	0	0	0	0.000239807	0	0
Otu191314	0	0	0	0	0	0	0	0	2.33171e-05	0	0	0	0	0	0	0	0	0	0	0	0	0	0	0	0	0	0	0	0	0	0	0	0	0	0	0	0	0	0	0	0	0	0	0	0	0	0	0	0
Otu192247	0	0	0	0	0	0	0	0	0	0	0	0	0	0	0	0	0.000276643	0	0	0	0	0	0	0	0	0	0	0	0	0	0	0	0	0	0	0	0	0	0	0	0	0	0	0	0	0	0	0	0
Otu222174	0	0	0	0	0	0	0	0	0	0	0	0	0	0	0	0	4.61072e-06	0	0	0	0	0	0	0	0	0	0	0	0	0	0	0	0	0	0	0	0	0	0	0	0	0	0	0	0	7.54243e-05	4.79614e-06	0	0
Otu275977	0	0	0	0	0	0	0	9.24492e-06	0	0	0	0	0	0	0	0	4.61072e-06	0	0	0	0	0	0	0	0	0	0	0	0	0	0	0	0	0	0	0	0	0	0	0	0	0	0	0	0	0.000115651	0	0	0
Otu30189	9.26359e-06	0	0	0	0	0	5.9522e-06	0	0	0	0	0	0	0	0	0	9.22143e-06	0	4.333e-06	0	0	0	0	1.02203e-05	0	0	0	0	0	0	0	0	0	0	0	0	0	0	5.06894e-06	0	0	0	0	0	0	0	7.19421e-05	0	0
Otu32730	0	0	0	0	0	0	5.9522e-06	0	0	0	4.88632e-06	0	0	0	0	0	0	0	0	0	0	0	0	0	6.62625e-05	0	0	0	0	0	0	0	0	4.7357e-06	0	0	0	0	0	0	0	0	0	0	0	0	3.83691e-05	0	0
Otu37424	0	0	0	0	0	0	0.000172614	0	0	0	0	0	0	0	0	0	0	0	0	0	0	0	0	0	0	0	0	0	0	0	0	0	0	0	0	0	0	0	0	0	0	0	0	0	0	3.5198e-05	0	0	0
Otu42326	0	0	0	0	0	0	0	0	0	0	0	0	0	0	0	0	0.0002582	0	0	0	0	0	0	0	0	0	0	0	0	0	0	0	0	0	0	0	0	0	0	0	0	0	0	0	0	0	0	0	0
Otu462493	0	0	0	0	0	0	0	0	0	0	0	0	0	0	0	0	0	0	0	0	0	0	0	0	0	0	0	0	0	0	0	0	0	0	0	0	0	0	0	0	0	0	0	0	0	0	8.15344e-05	0	0
Otu518380	0	0	0	0	0	0	0	0	0	0	0	0	0	0	0	0	0	0	0	0	0	0	0	0	0	0	0	0	0	0	0	0	0	0	0	0	0	0	0	0	0	0	0	0	0	5.53111e-05	0	0	0
Otu6	0.00545626	0.000513113	0.00429428	3.24852e-05	0.00414325	0.00433379	0.0551234	0.00599995	0.00368876	0.000184515	0.00481302	0.000602579	0.00135936	0.000323701	0.00198119	0.00104237	0.167572	0.000198135	0.000554624	0.00132614	0.00342454	0.000178573	0.000665589	0.00275948	0.00289188	0.00276202	0.000317975	0.000227846	0.00116004	0.000308122	0.000382337	8.12744e-05	3.79337e-05	0.010499	0.000778135	0.000377467	0.00139964	0.00736407	0.0115065	0.00397178	0.00453796	0.00078239	0.000838398	0.00020401	0.00364067	0.0964224	0.076297	0.000358864	0.00591837
Otu65873	0	0	0	0	0	0	0	0	0	0	0	0	0	0	0	0	0	0	0	0	0	0	0	0	9.46607e-06	0	0	0	0	0	0	0	0	4.7357e-06	0	0	0	0	0	0	0	0	0	0	0	0.000196103	0	0	0
Otu9268	0	0	0	0	0	0	0	0	0	0	0	0	0	0	0	0	3.2275e-05	0	0	0	0	0	0	0	0	0	0	0	0	0	0	0	0	0	0	0	0	5.95477e-05	0	0	0	0	0	0	4.48358e-06	0	0	0	0
Otu94298	0	0	0	0	0	0	0	0	0	0	0	0	0	0	0	0	0	0	0	0	0	0	0	0	0	0	0	0	0	0	0	0	0	0	0	0	0	0	0	0	0	0	0	0	0	5.02828e-06	6.7146e-05	0	0
Otu9961	0	0	0	0	0	0	0	0	0	0	0	0	0	0	0	0	4.61072e-06	0	0	0	0	0	0	0	0	0	0	0	0	0	0	0	0	0	0	0	0	0	0	0	0	0	0	0	0	0.000517913	0	0	0
Ewingella	0	0	0	0	0	0	0	0	0	0	0	0	0	5.08673e-05	0	0	0	0	2.5998e-05	0	0	0	0	0	0	0	0	0	0	0	0	0	0	0	0	0	0	0	0	0	0	0	0	0	0	0	0	0	0
Otu29125	0	0	0	0	0	0	0	0	0	0	0	0	0	5.08673e-05	0	0	0	0	0	0	0	0	0	0	0	0	0	0	0	0	0	0	0	0	0	0	0	0	0	0	0	0	0	0	0	0	0	0	0
Otu442738	0	0	0	0	0	0	0	0	0	0	0	0	0	0	0	0	0	0	2.5998e-05	0	0	0	0	0	0	0	0	0	0	0	0	0	0	0	0	0	0	0	0	0	0	0	0	0	0	0	0	0	0
Hafnia	0.293142	0.00817109	0.0697761	0.344315	0.303186	0.227718	0.308134	0.0740195	0.123655	0.568221	0.335461	0.196276	0.225861	0.122303	0.237897	0.146244	0.369355	0.543496	0.218353	0.386012	0.654102	0.691188	0.458561	0.550082	0.36415	0.355898	0.62375	0.38767	0.333694	0.575215	0.20457	0.103524	0.581396	0.312068	0.0936864	0.011706	0.186253	0.284956	0.454491	0.306563	0.323389	0.0766148	0.316396	0.0247564	0.351822	0.153307	0.248325	0.302364	0.448338
Otu1	0.0156092	0.000300123	0.0377477	0.00316498	0.11005	0.0519806	0.243868	0.0510042	0.0259659	0.01267	0.143716	0.104857	0.00196968	0.0477089	0.00778324	0.0886283	0.0515709	0.290147	0.00905164	0.0763285	0.478667	0.38227	0.0489331	0.384467	0.160317	0.0109359	0.553388	0.321317	0.120505	0.571532	0.066621	0.0725063	0.159867	0.223724	0.0355247	0.00369281	0.0671423	0.205574	0.0677311	0.0825758	0.203863	0.00296485	0.0209018	0.00928957	0.0399397	0.0384865	0.156911	0.211385	0.269609
Otu10	0.0254425	0.000242035	0.000352693	0.000199552	0.167063	0.0971367	0.00114878	0.000249613	0.0682165	7.56984e-05	0.0727182	0.000355478	0.205535	0.0375771	0.0671614	0.0318102	0.177808	0.110758	0.169906	0.116513	0.0102686	0.0429445	0.213279	0.0110226	0.130594	0.275547	0.0360834	0.0489224	0.116053	0.000317751	0.0301351	0.00349958	3.3192e-05	0.0141219	0.00086968	0.000363823	0.093973	0.0124207	0.281199	0.0220766	0.00686191	0.0546438	0.177517	0.00830273	0.153356	0.0245732	0.0118033	0.00187355	0.0473184
Otu10294	0	0	0	0	9.59085e-06	0	0	0	0	0	0	0	4.62366e-06	0	0	0	0	0	0	0	5.05094e-06	0.000146521	0	0	9.46607e-06	4.67347e-06	4.47852e-06	0	0	0	0	0	0	0	0	0	0	0	0	0	0	0	0	0	0	5.02828e-06	0	0	4.74989e-06
Otu1060	0	0	0	0	9.59085e-06	0	0	0	4.66342e-06	0	6.35222e-05	0	0	0	0	4.45458e-06	9.22143e-06	5.0804e-06	0	4.45012e-06	1.01019e-05	9.15759e-06	9.86057e-06	1.02203e-05	4.73303e-06	0	0	4.95317e-06	4.95742e-06	0	0	4.78085e-06	4.74172e-06	4.7357e-06	0	0	5.05285e-06	1.98492e-05	0	9.55904e-06	9.9955e-06	9.15076e-06	0	0	0	5.02828e-06	5.75537e-05	0	4.74989e-06
Otu108158	0	0	0	0	0	0	0	0	0	0	0	0	0	0	0	0	0	0	0	0	0.000227292	4.5788e-06	0	0	0	0	0	0	0	0	0	4.78085e-06	0	0	0	0	0	0	0	0	0	0	4.84623e-06	0	0	0	0	0	0
Otu1104	4.16862e-05	0	0	0	0	0	5.9522e-06	0	0	0	9.77264e-06	4.3351e-06	0	0	0	0	0	5.0804e-06	4.333e-06	2.22506e-05	0	0	4.93029e-06	0	0	1.40204e-05	0	7.42975e-05	0	0	0	0	0	0	0	0	0	0	0	0	0	0	4.84623e-06	0	2.24179e-05	5.02828e-06	4.79614e-06	1.39817e-05	1.42497e-05
Otu111907	0	0	0	0	0	0	0	0	0	0	0	0	0	0	0	0	0	0	0	0	0	0	0	0	4.73303e-06	6.54285e-05	0	0	0	0	0	0	0	0	0	0	0	0	0	0	0	0	0	0	0	0	0	0	0
Otu1124	0	0	0	0	7.19314e-05	0	5.9522e-06	0	0	0	4.88632e-06	0	0	9.2486e-06	4.42229e-06	0	4.61072e-05	1.01608e-05	0	1.78005e-05	3.03056e-05	4.5788e-06	0	0	4.25973e-05	0	4.47852e-06	0	0	9.62881e-06	9.93083e-06	1.91234e-05	3.79337e-05	9.4714e-06	0	0	0	4.96231e-06	0	0	0	0	0	0	4.48358e-06	0	4.79614e-06	1.86423e-05	2.37495e-05
Otu1180	0	4.84069e-06	6.67258e-05	0	0	0	0	0	0	0	0	0	0	0	0	0	0	1.01608e-05	0	3.11508e-05	0	0	0	5.11015e-06	0	0	4.47852e-06	0	0	0	0	0	0	1.42071e-05	0	0	0	4.96231e-05	5.06894e-06	2.38976e-05	0	0	4.84623e-06	0	0	0	0	0	0
Otu119266	0	0	0	0	0	0	0	0	0	0	0	0	0	0	0	0	0	0	0	0	0	0	0	0	0	0	0	0	0	0	0	0	9.00927e-05	0	0	0	0	0	0	0	0	4.57538e-06	0	0	0	0	0	0	0
Otu122888	4.6318e-06	0	0	0	0	0	5.9522e-06	0	0	0	1.4659e-05	0	0	0	0	0	4.61072e-06	1.01608e-05	4.333e-06	0	0	1.83152e-05	4.93029e-06	1.02203e-05	2.83982e-05	4.67347e-06	3.13496e-05	1.48595e-05	0	2.88864e-05	9.93083e-06	0	1.89669e-05	4.7357e-06	0	0	5.05285e-06	9.92462e-06	5.06894e-06	4.77952e-06	4.99775e-06	0	9.69246e-06	0	1.34507e-05	0	4.79614e-06	2.33029e-05	4.74989e-06
Otu122928	0	0	0	0	0	0	0	0	0	0	0	0	0	0	0	0	0	0	0	0	0	0	0	0	0	0	0	0	0	4.8144e-06	0	0	0	0	0	0	7.07399e-05	0	0	0	0	0	0	0	0	0	0	0	0
Otu123343	0	0	4.76613e-06	0	0	0	0	0	0	0	0	0	0	0	0	0	4.61072e-06	0	0	0	0	0	0	0	0	0	0	0	0	0.000702903	0	0	0	0	0	0	0	0	0	0	0	0	0	0	0	0	0	0	9.49979e-06
Otu123404	0	0	0	0	4.79543e-06	0	0	0	0	0	0	0	0	0	0	0	0	0	0	0	0	0	0	0	0	0	0	0	0	0	0	0	0	0	0	0	0	0	0	0	0	0	0	0	0	0	0	0	0
Otu123528	0	0	0	0	0	0	0	0	0	0	4.88632e-06	0	0	0	0	0	0	0	0	0	0	0	0	0	7.57285e-05	0	0	0	0	0	0	0	0	0	0	0	0	0	0	0	0	0	0	0	0	0	0	0	0
Otu127050	0	0	0	0	0	0	0	0	0	0	0	0	0	0	0	0	0	0	0	0	0	9.15759e-06	4.93029e-06	0	0	0	5.37423e-05	0	0	0	0	0	0	0	0	0	0	0	0	0	0	0	0	0	0	0	0	0	0
Otu128396	0	0	0	0	0	0	0	0	0	0	0	0	0	0	0	0	0	0	0	0	1.01019e-05	0	4.93029e-06	1.02203e-05	0	0	2.68711e-05	4.95317e-06	0	9.62881e-06	0	0	9.48344e-06	0	0	0	0	0	0	0	0	0	0	0	4.48358e-06	0	0	4.66057e-06	0
Otu129708	0	0	0	0	0	0	0	0	0	0	0	0	0	0	0	0	0	0	0	0	0	0	0	0	9.46607e-06	0	8.95704e-06	4.95317e-06	0	0	0	0	0	0	0	0	0	0	0	0	0	0	0	0	0	0	0.000139088	0	0
Otu13	0	0	1.42984e-05	0	4.79543e-06	9.96274e-06	0	0	0	0	2.44316e-05	0	0	4.6243e-06	0	4.45458e-06	0	1.52412e-05	8.666e-06	8.90024e-06	5.55603e-05	5.49456e-05	1.97211e-05	0.00702135	0.000146724	4.67347e-06	4.03067e-05	9.90634e-06	4.95742e-06	3.85152e-05	9.93083e-06	4.78085e-06	1.42252e-05	1.42071e-05	0	0	5.05285e-06	0	1.01379e-05	9.55904e-06	9.9955e-06	0	4.84623e-05	0	0	0	9.59228e-06	0.000932114	4.2749e-05
Otu130003	6.02133e-05	0	0	0	0	0	0	0	0	4.73115e-06	0	0	0	0	0	0	0	5.0804e-06	0	0	0	0	0	0	0	0	4.47852e-06	0	0	0	0	0	0	0	0	0	0	0	0	0	4.99775e-06	0	0	0	0	0	9.59228e-06	0	0
Otu1301	0	0	0	0	0	0	0	0	0	0	0	0	0	0	0	0	0	0	0	0	0	0	0	0	9.46607e-06	0	0	0	0	0	0	0	0	0	0	0	0	0	0	0	0	0	0	0	0	0	0	0	0
Otu132135	0	0	0	0	0	0	0	0	0	0	0	0	0	0	0	0	0	0	0	0	0	0.000155679	0	0	0	0	0	0	0	0	0	0	0	0	0	0	0	0	0	0	0	0	0	0	0	0	0	0	0
Otu137206	0	0	0	0	0	0	0	0	0	0	4.88632e-06	0	0	0	0	0	0	0	0	0	5.05094e-06	0	0	0	0	0	0	0	0	1.44432e-05	0	4.78085e-06	0	0	0	0	0	0	0	0	4.99775e-06	0	0	0	5.3803e-05	0	0	0	0
Otu137980	0	0	0	0	0	0	0	0	0	0	0	0	0	0	0	0	0	0	0	0	0	0	0	0	0	0	0	0	0	0	0	0	0	0	0	0	0	0	0	0	9.49573e-05	0	0	0	0	0	0	0	0
Otu14036	1.38954e-05	9.68139e-06	4.76613e-06	0	0.00023018	1.99255e-05	5.9522e-06	9.24492e-06	9.32684e-06	4.73115e-06	4.39769e-05	9.53723e-05	4.62366e-06	3.23701e-05	1.32669e-05	8.90916e-06	3.68857e-05	9.14472e-05	3.4664e-05	1.33504e-05	0.000111121	0.0001511	0.000123257	0.000296389	0.000104127	4.67347e-06	0.00015227	0.000143642	9.91483e-06	0.000341823	1.98617e-05	2.86851e-05	6.16423e-05	7.57712e-05	5.08585e-06	0	1.51586e-05	2.97739e-05	5.06894e-05	3.34566e-05	4.99775e-06	1.83015e-05	3.87698e-05	9.48884e-06	4.48358e-06	0	2.39807e-05	7.92297e-05	3.79992e-05
Otu14046	3.24226e-05	0	4.76613e-06	0	8.63177e-05	1.49441e-05	5.9522e-06	0	0	0	5.86358e-05	4.3351e-06	9.24731e-06	4.6243e-05	0	4.45458e-06	6.455e-05	1.52412e-05	4.333e-06	3.11508e-05	2.02038e-05	3.20516e-05	8.38149e-05	3.06609e-05	9.46607e-06	0.000177592	0	0	0	0	4.96542e-06	1.43425e-05	3.3192e-05	4.7357e-06	0	0	1.01057e-05	4.96231e-06	1.52068e-05	5.25747e-05	3.49843e-05	4.57538e-06	3.39236e-05	0	2.69015e-05	5.02828e-06	9.59228e-06	4.66057e-06	1.89996e-05
Otu14122	0	0	0	0	0	0	0	0	0	0	0	0	0	0	0	0	1.84429e-05	6.09648e-05	8.666e-06	8.90024e-06	0	2.2894e-05	0	7.66522e-05	0	6.0755e-05	4.47852e-06	0	0	0	0	0	0	0	0	0	0	0	5.06894e-06	0	0	0	0	0	0	0	0	1.39817e-05	0
Otu14393	0	0	0	0	4.79543e-06	0	0	0	0	0	0	0	0	0	0	1.33637e-05	9.22143e-06	1.52412e-05	0	4.45012e-06	0	3.20516e-05	1.47909e-05	2.04406e-05	2.83982e-05	9.34693e-06	5.37423e-05	9.90634e-06	0	9.14737e-05	2.48271e-05	0	1.89669e-05	3.78856e-05	0	0	0	0	1.01379e-05	0	4.99775e-06	0	9.69246e-06	0	4.48358e-06	0	4.79614e-06	0.000125835	9.49979e-06
Otu14852	0	0	0	0	0	0	1.19044e-05	0	0	0	0	0	0	0	0	0	0	0	0	0	0	4.5788e-05	0	0	9.46607e-06	0	0	0	1.48722e-05	0	0	0	0	0	0	0	0	0	0	0	0	0	0	0	0	0	0	0	0
Otu149781	0	0	0	0	0	0	0	0	0	0	9.77264e-06	0	0	0	0	0	0	0	0	0	0	0	4.93029e-06	0	0	0	2.23926e-05	4.95317e-06	0	0	0	0	0	0	0	0	0	0	0	0	0	0	0	0	0	0	0	0	0
Otu150836	0	0	0	0	0	0	0	0	0	0	0	0	0	0	0	0	0	0	0	0	0	0	0	0	0	0	4.47852e-06	0	0	0	0	0	0	0	0	0	0	0	0	0	0	0	0	0	0	0	0	0.000149138	0
Otu15214	0	0	0	0	0	0	0	0	0	0	0	0	0	0	0	0	0	0	0	0	0	0	0	0	9.46607e-06	6.54285e-05	0	0	0	0	0	0	0	0	0	0	0	0	0	0	0	0	0	0	0	0	0	9.32114e-06	0
Otu153479	0	0	0	0	0	0	0	0	0	0	0	0	0	0	0	0	0	0	0	0	0	0	0	0	0	0	0	0	4.95742e-06	0	0	0	0	0	0	0	0	0	0	0	4.99775e-06	0	0	0	0	5.02828e-06	0	0	0
Otu163801	0	0	0	0	0	0	0	0	0	0	0	0	0	0	0	0	0	0	0	0	0	0	4.93029e-06	1.02203e-05	0	0	0	0	0	9.62881e-06	4.96542e-06	0	0	0	0	0	0	0	5.06894e-06	0	0	0	0	0	0	0	0	0	0
Otu165974	0	0	0	0	0	0	0	0	0	0	0	0	0	0	0	0	0	0	0	0	0	0	0	5.11015e-06	0	0	6.71778e-05	0	0	0	0	0	4.74172e-06	0	0	0	0	0	0	0	0	0	0	0	0	0	0	4.66057e-06	0
Otu166124	0	0	0	0	0	0	0	0	0	0	0	0	0	0	0	0	0	0	0	0	1.51528e-05	0	0	0	0	0	0	0	0	0	0	0	0	0	0	0	0	0	0	0	0	0	0	0	0	0	0	0	0
Otu179264	0	0	0	0	0	0	0	0	0	0	0	0	0	0	0	0	0	0	0	0	0	0	0	0	0	0	0	0	9.41909e-05	0	0	0	0	0	0	0	0	0	0	0	0	0	0	0	0	0	0	0	0
Otu185811	0	0	0	0	0.000143863	0	0	0	0	0	0	0	0	0	0	0	0	0	0	0	0	0	0	0	0	0	0	0	0	0	4.96542e-06	0	0	0	0	0	0	0	0	0	0	0	0	0	0	0	0	0	0
Otu192522	0	0	0	0	0	0	0	0	0	0	0	0	0	0	0	0	0	0	0	0	0	0	0	0	0	0	0	0	0	0	0	0	0	9.4714e-06	0	0	0	0	0	0	0	0	0	0	0	0	0	1.86423e-05	0
Otu201899	0	0	0	0	0	0	0	0	0	0	0	0	0	0	0	0	0	0	0	0	0	0	0	0	0	0	0	0	0	0	0	0	0	0	0	0	0	0	0	4.77952e-06	0	0	0	0	0	0	0	0	0
Otu203257	0	0	0	0	0	0	0	0	0	0	0	0	0	0	0	0	0	0	0	0	0	0	0	0	0	0	4.47852e-06	0	0	0	0	0	0	0	0	0	0	0	0	0	0	0	0	0	0	0	0	0	0
Otu2062	0	0	0	0	0	0	0	0	0	0	0	0	0	0	0	0	0	0	0	0	0	4.5788e-06	0	0	0	0	0	0	6.94038e-05	4.8144e-06	9.93083e-06	0	0	0	0	0	0	0	0	0	0	0	0	0	0	0	0	4.66057e-06	4.74989e-06
Otu2131	0	0	0	0	0	0	0	0	0	0	0	0	0	0	0	0	4.61072e-06	0	0	8.90024e-06	2.02038e-05	1.83152e-05	0	5.11015e-06	2.36652e-05	0	1.79141e-05	4.95317e-06	0	0	0.00011917	0	0	4.7357e-06	0	0	0	0	0.00354319	0	0	0	0	0	0	0	0	4.66057e-06	0
Otu216510	0	0	0	0	4.79543e-06	0	5.9522e-06	0	0	0	4.88632e-06	0	0	0	0	0	4.61072e-06	5.0804e-06	0	8.90024e-06	5.05094e-06	0	4.93029e-06	0	0	0	4.47852e-06	4.95317e-06	0	0	0	0	1.89669e-05	1.42071e-05	5.08585e-06	0	0	0	5.06894e-06	0	0	4.57538e-06	0	0	0	0	0	4.66057e-06	4.74989e-06
Otu221236	0	0	0	0	0	0	0	0	0	0	0	0	0	0	0	0	0	0	0	0	0	0	9.86057e-06	0	0	0	0	0	0	0	0	0	0	0	0	0	0	0	0	0	0	0	4.84623e-06	0	0	0	0	4.66057e-06	0
Otu222551	0	0	0	0	0	0	0	0	0	0	0	0	0	0	0	0	0	0	0	1.33504e-05	1.01019e-05	0	0	0	0	0	0	0	0	0	0	0	0	0	0	0	0	0	0	0	0	0	0	0	0	0	0	0	0.000189996
Otu22482	0	0	0	0	0	0	0	0	0	0	0	0	0	0	0	0	0	0	0	0	0	0	0	0	0	0	0	0	0	0	0	0	0	0	0	0	0	0	0	0	0	0	0	0	0	0	0	0	0
Otu231167	0	0	0	0	0	0	0	0	0	0	0	0	0	0	0	0	0	9.65275e-05	0	0	0	0	0	0	0	0	0	0	0	0	0	0	0	0	0	0	0	0	0	0	0	0	0	0	0	0	0	0	0
Otu239729	0	0	0	0	0	0	0	0	0	0	0	0	0	0	0	0	0	0	0	0	0	0	4.93029e-06	0	0	0	0	0	0	1.92576e-05	0	0	0	0	0	0	0	0	0	0	0	0	0	0	0	0	0	0	0
Otu244069	0	0	0	0	0	0	0	0	0	0	0	0	0	0	0	8.90916e-05	0	0	0	0	0	0	0	0	0	0	0	0	0	0	0	0	0	0	0	0	0	0	0	0	0	0	0	0	0	0	0	0	0
Otu25421	0	0	0	4.64074e-06	0	0	0	0	0	0	4.88632e-06	4.3351e-06	0	0	8.84459e-06	0	0	0	0	4.45012e-06	0	4.5788e-06	0	0	0	0	0	0	0	0	0	0	0	0	0	0	0	1.48869e-05	0	0	0	0	2.90774e-05	0	4.48358e-06	0	0	0	4.74989e-06
Otu256942	0	0	0	0	0	0	0	0	0	0	0	0	0	0	0	0	0	0	0	0	0	0	0	0.000434363	0	0	0	0	0	0	0	0	0	0	0	0	0	0	0	0	0	0	0	0	0	0	0	0	0
Otu257409	0	0	9.53225e-06	0	4.79543e-06	9.96274e-06	1.78566e-05	0	4.66342e-06	0	4.88632e-06	0	0	0	8.84459e-06	4.45458e-06	4.61072e-06	0	0	0	1.51528e-05	0	0	0	1.41991e-05	0	0	0	0	0	4.96542e-06	0	0	9.4714e-06	0	0	0	9.92462e-06	0	4.77952e-06	1.49933e-05	0	4.84623e-06	4.74442e-06	0	1.00566e-05	0	4.66057e-06	9.49979e-06
Otu257518	0	0	0	0	0	0	0	0	0	0	0	0	0	0	0	0	0	0	0	0	0	0	4.93029e-06	0	4.73303e-06	0	4.47852e-06	9.90634e-06	0	5.29585e-05	0	0	0	0	0	0	0	0	0	0	4.99775e-06	0	0	0	0	0	0	0	0
Otu262579	0	0	0	0	0	0	0	0	0	0	0	0	0	0	0	0	0	5.0804e-06	8.666e-06	0	0	0	0	2.55507e-05	4.73303e-06	0	0	0	0	0	0	0	0	0	0	0	0	0	1.01379e-05	0	0	0	0	0	0	0	0	4.66057e-06	4.74989e-06
Otu264526	0	0	0	0	0	0	0	0	0	0	0	0	0	0	0	0	0	0	0.000103992	0	0	0	0	0	0	0	0	0	0	4.8144e-06	0	0	0	0	0	0	0	0	0	0	0	0	0	0	0	0	0	0	0
Otu277443	0	0	0	0	0	0	0	0	0	0	0	0	0	0	0	0	0.000142932	0	0	4.45012e-06	0	4.5788e-06	4.93029e-06	0	0	0	0	0	0	4.8144e-06	0	0	0	0	0	0	0	0	0	0	0	0	0	0	0	0	0	0	0
Otu282009	0	0	0	0	0	0	0	0	4.66342e-06	0	0	0	0	0	0	0	0	0	0	0	0	0	0	0	0	0	0	0	0	0	0	0	4.74172e-06	0	0	0	0	0	0	5.25747e-05	0	0	1.93849e-05	0	0	0	0	0	0
Otu290157	0	0	0	0	0	0	0	0	0	0	0	0	0	0	0	0	0	0	0	0	0.000202038	0	9.86057e-06	5.11015e-06	0	0	0	0	0	0	0	0	0	0	0	0	0	0	0	0	0	0	0	0	0	0	0	0	0
Otu292185	0	0	0	0	0	9.96274e-06	0	0	0	0	0	0	4.62366e-06	0	0	0	0	0	0	0	0	1.37364e-05	1.47909e-05	5.11015e-06	4.73303e-06	0	4.47852e-06	0	0	6.25873e-05	0	9.56169e-06	1.42252e-05	0	0	0	0	0	0	0	9.9955e-06	0	4.84623e-06	0	0	0	1.91846e-05	9.32114e-06	4.74989e-06
Otu292476	0	0	0	0	0	0	0	0	0	0	0	0	0	0	0	0	0	0	0	0.000124603	0	0	0	0	0	0	0	0	0	0	0	0	0	0	0	0	0	0	0	0	0	0	0	0	0	0	0	0	0
Otu29597	0	0	0	0	0	0	0	0	0	0	0	0	0	0	0	0	0	0	0	0	0	0	0	0	0	0	0	0	0	0	0	0	0	0	0	0	0	0	0	0	0	0	0	0	0	0	0	0	0
Otu300998	0	0	0	0	0	0	0	0	0	0	0	0	0	0	0	0	0	0	0	0	0	0	0	0	0	0	0	0	0	0	0	0	0	0	0	0	0	0	5.06894e-06	0	0.000249888	0	0	0	0	0	0	0	0
Otu30662	0	0	0	0	0	0	0	0	0	0	0	0	0	0	0	0	0	0	0	0	0	0	0	0	0	0	0	0	0	0	0	0	4.74172e-06	0	0	0	0	0	0	0	0	0	0	0	0	0	0	0	0
Otu307066	0	0	0	4.64074e-06	0	0	5.9522e-06	0	0	0	0	0	0	0	0	0	0	1.52412e-05	0	0	5.05094e-06	0	0	0	0	1.40204e-05	0	0	0	0	4.96542e-06	0	0	0	0	4.54779e-06	0	0	5.06894e-06	9.55904e-06	0	0	0	0	0	0	0	6.99086e-05	1.89996e-05
Otu30725	0	0	0	0	0	0	0	0	0	0	0	0	0	0.000115607	0	0	0	0	0	0	0	0	0	5.11015e-06	0	0	0	0	0	0	0	0	0	0	0	0	0	0	0	0	0	0	0	0	0	0	0	0	0
Otu30731	0	0	0	0	0	0	0	0	0	0	0	0	0	0	0	0	0	0	0	0	0	0	0	0	0	0	0	0	0	0	0	0	0	0	0	0	0	0	0	0	0	0	0	0	0	0	0	0	0
Otu324022	0	0	0	0	0	0	0	0	0	0	0	0	0	0	0	0	0	0	0	0	0	0	0	0	0	0	0	0	0	0.000409224	0	0	0	0	0	0	0	0	0	0	0	0	0	0	0	0	0	0	0
Otu32975	0	0	0	0	0	0	0	0	0	0	0	0	0	0	0	0	0	0	0	0	0	0	0	0	0	0	8.95704e-06	0	0	1.44432e-05	0	4.78085e-06	0	0	0	0	0	0	0	0	0	0	0	0	0	0	0	0	0.000579487
Otu33004	0	0	0	0	0	4.98137e-06	0	0	0	0	4.88632e-06	0	0	0	0	0	0	5.0804e-06	0	0	0	0	0	0	9.46607e-06	0	0	7.92507e-05	0	0	0	0	0	2.84142e-05	2.03434e-05	0	0	0	0	4.77952e-06	0	0	0	0	0	0	0	0	5.69987e-05
Otu331723	0	0	0	0	0	0	0	0	0	0	0	0	0	0	0	0	0	0	0	4.45012e-06	0	0	0	0	0	0	0	0	8.92335e-05	0	0	0	0	0	0	0	0	0	0	0	0	0	0	0	0	0	0	0	0
Otu341858	0	0	0	0	0	0	0	0	0	0	0	0	0	0	0	0	0	0	0	0	0	7.78395e-05	0	0	0	0	0	0	0	0	0	0	0	0	0	0	0	0	0	0	0	0	0	0	0	0	0	0	0
Otu352774	0	0	0	0	0	0	0	0	0	0	0	0	0	0	0	0	0	0	0	0	0	0	0	0	0	0	0	0	0	0	0	0	0	0	0	0	0	0	0	0	0	0	0	0	0	0	0	0	0
Otu354824	0	0	0	0	0	0	0	0	0	0	0	0	0	0	0	0	0	0	0	0	0	0	0	0	0	0	0	0	0	0	0	0	0	0	0	0	0	0	0	9.55904e-06	0	0	0	0	0	0	0	0	0.000170996
Otu36315	0	0	0	4.64074e-06	4.79543e-06	9.96274e-06	0	4.62246e-06	4.66342e-06	0	1.95453e-05	0	0	4.6243e-06	4.42229e-06	0	0	1.01608e-05	4.333e-06	4.45012e-06	2.52547e-05	4.5788e-06	0	0	0	9.34693e-06	0	9.90634e-06	4.95742e-06	4.8144e-06	1.48962e-05	0	0	9.4714e-06	0	0	1.01057e-05	1.48869e-05	5.06894e-05	0	4.99775e-06	0	4.84623e-06	0	4.48358e-06	5.02828e-06	1.91846e-05	0	3.79992e-05
Otu36469	1.38954e-05	2.90442e-05	0.000104855	0	4.79543e-06	0	0	0	0	0	0	0	0	0	0	0	0	1.01608e-05	0	0	0	0	0	0	0	0	0	0	0	0	0	0	0	4.7357e-06	0	0	0	4.96231e-06	0	0	0	0	4.84623e-06	0	0	0	9.59228e-05	0	0
Otu36483	0	0	0	0	0	0	0	0	0	0	0	0	0	0	0	0	0	0	4.333e-06	0	0	0	0	0	1.41991e-05	4.67347e-06	4.47852e-06	0	0	0	9.93083e-06	0	0	4.7357e-06	0	0	0	0	0	0	0	0	0	0	0	6.53677e-05	0	4.66057e-06	4.74989e-06
Otu36491	0	0	0	0	0	0	0	0	0	0	4.88632e-06	0	4.62366e-06	0	0	0	0	0	4.333e-06	2.22506e-05	1.51528e-05	0	9.86057e-06	5.11015e-06	0	4.67347e-06	0	4.95317e-06	4.95742e-06	0	0	0	0.000151735	0	0	0	5.05285e-06	0	0	2.86771e-05	9.9955e-06	0	9.69246e-06	0	8.96716e-06	0	9.59228e-06	0	1.42497e-05
Otu36539	0	0	0	0	0	0	0	0	0	0	0	0	0	0	0	0	0	0	4.333e-06	0	0	0	0	0	0	0	0	4.95317e-06	0	0	4.96542e-06	0	0	0	0	0	0	0	0	4.77952e-06	0	0	0	0	0	0	0	0	0
Otu371970	0	0	0	0	0	0	0	0	0	0	0	0	0	0	0	0	0	0	0	0	5.55603e-05	0	0	0	0	0	0	0	0	0	0	0	0	0	0	0	0	0	0	0	0	0	0	0	0	0	0	0	0
Otu372227	0	0	0	0	0	4.98137e-06	0	0	0	0	0	0	0	0	0	0	0	0	0	0	0	0	0	0	0	0	0	0	0	0	0	0	0	0	0	0	0	0	0	0	0	0	0	0	0	0	0	0	0
Otu375822	0	0	0	0	0	0	0	0	0	0	0	0	0	0	0	0	0	0	0	0	0	0	0	0	0	0	0	0	0	0	0	0	0	0	0	0	0	0	0	0	0	0	0	0	0	0	0	0	0
Otu37919	9.26359e-06	0	0	0	0	0	2.38088e-05	0	4.66342e-06	4.73115e-06	0	0	0	0	4.42229e-06	0	0	1.01608e-05	4.333e-06	0	5.05094e-06	0	0	0	4.73303e-06	4.67347e-06	0	0	0	0	0	0	0	9.4714e-06	0	0	0	9.92462e-06	0	1.43386e-05	0	0	0	0	0	0	0	0	0
Otu380094	0	0	0	0	0	0	0	0	0	0	0	0	0	0	0	0	0	0	0	0	0	0	0	5.11015e-06	0	9.34693e-06	0	0	8.42761e-05	0	0	0	0	0	0	0	0	0	0	0	0	0	0	0	0	0	0	0	0
Otu398063	0	0	0	0	0	0	0	0	0	0	0	0	0	0	0	0	4.61072e-06	0	0	0	0	0	0	0	0	0	0	0	0	0	0	0	0	0	0	0	0	0	0	0	0	0	0	0	0	0	0	0	0
Otu402535	0	0	0	0	0	0	0	0	0	0	4.88632e-06	0	0	0	0	0	0	0	0	0	0	0	0	1.02203e-05	0	4.67347e-06	0	0	4.95742e-06	0	0	0	0	0	0	0	0	5.95477e-05	0	4.77952e-06	4.99775e-06	0	0	0	0	0	0	0	4.74989e-06
Otu408780	0	0	0	0	0	0	0	0	0	0	0	0	0	0	0	0	0	0	0	0	0	0	0	0	0	0	0	0	0	9.62881e-06	0	0	0	0	0	0	0	0	0	0	0	0	0	0	0	0	0	0	0
Otu412435	0	0	0	0	0	0	0	0	0	0	0	0	0	0	0	0	0	0	0	0	0	0	0	0	0	0	0	0	0	0	0	0	0	0	0	0	0	0	0	0	0	0	0	0	0	0	0	0	0
Otu414971	0	0	0	0	0	0	0	0	0	0	0	0	0	0	0	0	0	0	0	0	0	0	0	0	0	0.00013553	0	0	0	0	0	0	0	0	0	0	0	0	0	0	0	0	0	0	0	0	0	4.66057e-06	0
Otu418342	0	0	0	0	6.7136e-05	0	0	0	0	0	4.88632e-06	0	0	0	0	0	0	0	0	0	0	0	0	0	0	0	0	0	0	0	0	0	4.74172e-06	0	0	0	0	0	0	0	0	0	0	0	0	0	0	0	0
Otu428000	0	0	0	0	0	0	0	0	0	0	0	0	0	0	0	0	0	0	0	0	0	0	0	0	0	0	0	0	0	0	0	0	0	0	0	0	0	0	0	0	0	0	0	0	0	0	0	0	0
Otu42874	0	0	0	0	0	0	0	0	0	0	0	0	0	0	0	0	0	0	0	0	0	0	0	0	0	0	1.34356e-05	0	0	0	0	0	0	0	0	0	0	0	0	0	0	0	0	0	0	0	0	0	0
Otu437080	0	0	0	0	0	0	0	0	0	0	0	0	0	0	6.63344e-05	0	0	0	0	0	0	0	0	0	0	0	0	0	0	0	0	0	0	0	0	0	0	0	0	0	0	0	0	0	0	0	0	0	0
Otu442742	0	0	0	0	0	0	8.33309e-05	0	0	0	0	0	0	0	0	0	0	0	0	0	0	0	0	0	0	0	0	0	0	0	0	0	0	0	0	0	0	0	0	0	0	0	0	0	0	0	0	0	0
Otu44759	0	0	0	0	0	0	0	0	0	0	0	0	0	0	0	0	0	0	0	0	0	0	0	0	0	0	0	0	0	0	0	0	0	0	0	0	0	0	0	0	0	0	0	0	0	0	0	0	0
Otu448912	0	0	0	0	0	0	0	0	0	0	0	6.93617e-05	0	0	0	0	0	0	0	0	0	0	0	0	0	0	0	0	0	0	0	0	0	0	0	0	0	0	0	0	0	0	0	0	0	0	0	0	0
Otu451672	0	0	0	0	0	0	0	0	0	0	0	0	0	0	0	0	0	0	0	0	0	0	0	0	0	0	0	0	0	0	0	0	0	0	0	0	0	0	0	0	0	0	0	0	0	0	0	0	0
Otu453544	0	0	0	0	0	0	0	0	0	0	0	0	0	0	0	0	0	0	0	0	0	0	0	0	0	0	0	0	0	0	0	0	0	0	0	0	0	0	0	0	0	0	0	0	0	0	0	0	0
Otu456742	0	0	0	0	0	0	0	0	0	0	1.4659e-05	0	0	0	0	0	0	0	0	0	0	0	0	0	0	0	0	0	0	0	0	0	0	0	0	0	0	0	0	0	0	0	0	0	0	0	0	0	0
Otu460878	0	0	0	0	0	0	0	0	0	0	0	0	0	0	0	0	0	0	0	0	0	0	0	0	0	0	0	0	0	0	0	0	0	0	0	0	0	0	0	0	0	0	0	0	0	0	0	0	0
Otu462491	0	0	0	0	0	0	0	0	0	0	0	0	0	0	0	0	0	0	0	0	0	0	0	0	0	0	0	0	0	0	0	0	0	0	0	0	0	0	0	0	0	0	0	0	0	0	0	0	0
Otu462496	0	0	0	0	0	0	0	0	0	0	0	0	0	0	0	0	0	0	0	0	0	0	0	0	0	0	0	0	6.94038e-05	0	0	0	0	0	0	0	0	0	0	0	0	0	0	0	0	0	0	0	0
Otu462497	0	0	0	0	0	0	0	0	0	0	0	0	0	0	0	0	0	0	0	0	0	0	0	5.62116e-05	0	0	0	0	0	0	0	0	0	0	0	0	0	0	0	0	0	0	0	0	0	0	0	0	0
Otu469494	0	0	0	0	0	0	0	0	0	0	0	0	0	0	0	0	0	0	0	0	0	0	0	0	0	0.000116837	0	0	0	0	0	0	0	0	0	0	0	0	0	0	0	0	0	0	0	0	0	0	0
Otu472510	0	0	0	0	0	0.000139478	0	0	0	0	0	0	0	0	0	0	0	0	0	0	0	0	0	0	0	0	0	0	0	0	0	0	4.74172e-06	0	0	0	0	0	0	0	0	0	1.45387e-05	0	0	0	0	0	0
Otu472596	0	0	0	0	0	0	0	0	0	0	0	0	0	0	0	0	0	0	0	0	0	0	0	0	0	0	0	0	0	0	0	0	0	0	0	0	0	0	0	0	0	0	0	0	0.000138991	0	0	0	0
Otu472597	0	0	0	0	0	0	0	0	0	0	0	0	0	0	0	0	0	0	0	0	0	0	0	0	0	0	0	0	0	0	0	0	0	0	0	0	0	0	0	0	0	0	0	0	0	0	0.000129496	0	0
Otu472605	0	0	0	0	0	0	0	0	0	0	0	0	0	0	0	0	0	0	0	0	0	0	0	0	0	0	0	0	0	0	0	0	0	0	0	0	0	0	0	0	0	0	0	0	0	0	0	0	0
Otu476951	0	0	0	0	0	0	0	0	0	0	0	0	0	5.08673e-05	0	0	0	0	0	0	0	0	0	0	0	0	0	0	0	0	0	0	0	0	0	0	0	0	0	0	0	0	0	0	0	0	0	0	0
Otu478704	0	0	0	0	0	0	0	0	0	0	0	0	0	0	0	0	0	0	0	0	0	0	0	0	0	0	0	0	0	0	0	0	0	0	0	0	0	6.451e-05	0	0	0	0	0	0	0	0	0	0	0
Otu482854	0	0	0	0	0	0	0	0	0	0	0	0	0	0	0	0	0	5.0804e-06	0	0	0	0	0	0	0	0	0	0	0	0	0	0	9.48344e-06	0	0	0	0	0	0	0	0	0	0	0	0	0	0	0	0
Otu485829	0	0	0	0	0	0	0	0	0	0	0	0	0	0	0	0	0	0	0	0	0	0	0	0	0	0	0	0	0	0	0	0	0	0	0	0	0	0	0	0	0	0	0	0	0	0	0	0	0
Otu49414	0	0	0	0	0	0	0	0	0	0	4.88632e-06	0	0	0	0	0	0	0	0	8.90024e-06	3.53566e-05	4.5788e-06	0	5.11015e-06	1.89321e-05	0	1.34356e-05	4.95317e-06	0	1.44432e-05	0	4.78085e-06	4.74172e-06	0	0	0	5.05285e-06	0	0	9.55904e-06	1.49933e-05	0	0	0	0	0	0.000119904	2.79634e-05	0
Otu497752	0	0	0	0	0	0	0	0	0	0	0	0	0	0	0	0	0	0	0	0	0	0	0.000192281	0	0	0	0	0	0	0	0	0	0	0	0	0	0	0	0	0	0	0	0	0	0	0	0	0	0
Otu501763	0	0	0	0	0	0	0	0	0	0	0	0	0	0	0	0	0	0	0	0	0	0	0	0	0	0	0	0	0	0	0	0	0	0	0	0	0	0	0	0	0	0	0	0	0	0	0	0	0
Otu504388	0	0	0	0	0	0	0	0	0	0	0	0	0	0	0	0	0	0	0	0	0	0	0	0	0	0	0	0	0	0	0	0	0	0	0	0	0	0	0	0	0	0	0	0	0	0	0	0	0
Otu509738	0	0	0	0	0	0	0	0	0	0	0	0	0	0	0	0	0	0	0	0	0	0	0	0	0	0	0	0	0	0	0	0	0	0	0	0	0	0	0	0	0	0	0.000116309	0	0	0	0	0	0
Otu510858	0	0	0	0	0	0	0	0	0	0	0	0	0	0	0	0	0	0	0	0	0	0	0	0	0	0	0	0	0	0	0	0	0	0	0	0	0	0	0	0	0	0	0.000150233	0	0	0	0	0	0
Otu513475	0	0	0	0	0	0	0	0	0	0	0	0	0	0	0	0	0	0	0	0	0	0	0	0	0	0	0	0	0	0	0	0	0	0	0	0	0	0	0	0	0	0	0	0	0	0	0	0	0
Otu517015	0	0	0	0	0	0	0	0	0	0	0	0	0	0	0	0	0	0	0	0	0	0	0	9.19827e-05	0	0	0	0	0	0	0	0	0	0	0	0	0	0	0	0	0	0	0	0	0	0	0	0	0
Otu517670	0	0	0	0	0	0	0	0	0	0	0	0	0	0	0	0	0	0	0	0	0	0	0	0	0	0	0	0	0	0	0	0	0	0	0	0	0	0	0	0	0	0	0	0	0	0	0	0	0
Otu518377	0	0	0	0	0	0	0	0	0	0	0	0	0	0	0	0	0	0	0	0	0	0	0.000443726	0	0	0	0	0	0	0	0	0	0	0	0	0	0	0	0	0	0	0	0	0	0	0	0	0	0
Otu519550	0	0	0	0	0	0	0	0	0	0	0	0	0	0	0	0	0	0	0	0	0	0	0	0	0	0	0	0	0	0	0	0	0	0	0	0	0	0	0	0	0	0	0	0	0	0	0	0	0
Otu520638	0	0	0	0	0	0	0	0	0	0	0.000161249	0	0	0	0	0	0	0	0	0	0	0	0	0	0	0	0	0	0	0	0	0	0	0	0	0	0	0	0	0	0	0	0	0	0	0	0	0	0
Otu52388	0	0	0	0	0	0.000259031	0	0	0	0	0	0	0	0	0	0	0	0	0	0	5.05094e-06	0	0	0	0	0	0	0	0	0	0	0	0	0	0	0	0	4.96231e-06	0	0	0	0	4.84623e-06	0	0	0	0	0	0
Otu55129	0	0	0	0	0	0	0	0	0	0	0	0	0	0	0	0	0	0	0	4.45012e-06	0	0	0	0	0	0	0	0	0	0	0	0	0	0	0	0	0	0	0	0	0	0	0	0	0	0	0	0	0
Otu5925	0	0	0	0	0	0	0	0	0	0	0	0	0	0	0	0	0	0	0	0	0	0	0	0	0	0	0	0	0	0	0	0	0	0	0	0	0	0	0	0	0	0	0	0	0	0	0	0	0
Otu62524	0	0	0	0	0	0	0	0	0	0	0	0	0	0	0	0	0	0	0	0	0.000146477	0	0	0	0	4.67347e-06	4.47852e-06	0	0	0	0	0	9.48344e-06	0	0	0	0	0	0	9.55904e-06	0	0	0	0	0	0	0	4.66057e-06	0
Otu63671	0	0	0	0	0	0	0	0	0	0	0	0	0	0	0	0	0	0	0	0	5.05094e-06	4.5788e-06	0	5.11015e-06	0	0	0	0	0	4.8144e-06	0	0	0	0	0	0	0	0	0	0	0	0	0	0	0	0	0	4.66057e-06	0
Otu64687	0	0	0	0	0	4.98137e-06	0	0	0	0	4.88632e-06	0	0	4.6243e-06	4.42229e-06	0	0	0	8.666e-06	4.45012e-06	0	3.66304e-05	8.87451e-05	0	1.89321e-05	4.67347e-06	3.13496e-05	9.90634e-06	0	1.44432e-05	9.93083e-06	0	1.42252e-05	0	0	0	0	4.96231e-06	5.06894e-06	9.55904e-06	0	0	0	0	0	0	4.79614e-06	0	4.74989e-06
Otu65168	0	0	0	0	0	0	0	0	0	0	0	0	0	0	0	0	0	0	0	0	0	0	0	0	0	0	0	0	0	0	0	0	0	0	0	0	0	0	0	0	0	0	0	0	0	0	0	0	0
Otu65199	0	0	0	0	0	0	0	0	6.06244e-05	0	0	0	0	0	0	0	0	0	8.666e-06	0	0	4.5788e-06	0	0	0	0	0	0	0	0	0	0	0	0	0	0	0	0	0	0	9.9955e-06	0	1.45387e-05	0	0	0	0	0	0
Otu65659	0	0	0	0	0	0	8.92831e-05	0	0	0	9.77264e-06	0	0	0	0	0	0	0	0	0	0	4.5788e-06	0	0	0	0	0	0	0	0	0	0	4.74172e-06	0	0	0	0	0	0	0	0	0	0	0	0	0	0	4.66057e-06	0
Otu65861	0	0	0	0	0	0	0	0	0	0	9.77264e-06	0	0	0	0	0	0	0	0	0	0	0	0	0	0	0	0	0	4.95742e-06	0	0	0	0	0	0	0	0	0	0	0	0	0	4.84623e-06	0	0	0	0	0	0
Otu66626	0	0	0	0	0	0	0	0	0	0	0	0	0	4.6243e-06	0	0	0	0	0	1.33504e-05	0	6.41032e-05	4.93029e-06	2.55507e-05	1.89321e-05	4.67347e-06	4.47852e-06	0	0	1.92576e-05	0	0	1.42252e-05	0	0	0	0	0	0	4.77952e-06	1.49933e-05	0	0	0	0	0	0	1.39817e-05	1.42497e-05
Otu67104	0	0	0	0	0	0	0	0	0	0	0	0	0	0	0	0	0	0	0	0	0	0	0	0	0.000236652	0	0	4.95317e-06	0	0	0	0	0	0	0	0	0	0	0	0	0	0	0	0	0	0	0	0	0
Otu69650	0	0	0	0	0	0	0	0	0	0	0	0	0	0	0	0	0	0	0	0	0	0	0	0	0	0	0	0	0	0	0	0	4.74172e-06	0	0	0	0	0	0	0	0	0	0	0	0	0	0	0	0
Otu70152	0	0	0	0	0	0	0	0	0	0	0	0	0	0	0	0	0	0	0	0	0	0	0	0	0	0	0	0	0	0	0	0	0	0	0	0	0	0	0	0	0	0	0	0	0	0	0	0.000228368	0
Otu730	0	0	4.76613e-06	0	0	0	0	0	0	0	5.86358e-05	0	0	0	0	0	0	0	0	0	9.09169e-05	0	0.000448656	0.000183965	0	0	0.000201533	3.46722e-05	0	1.92576e-05	0	0	4.26755e-05	9.4714e-06	0	0	0	0	0	0.000387141	0	0	4.84623e-06	0	0	0	0	3.72846e-05	0
Otu8	0.251872	0.007566	0.0314469	0.340936	0.0253294	0.0780431	0.0628374	0.0226824	0.0293609	0.555461	0.118117	0.0907987	0.0182773	0.0365967	0.162763	0.0253109	0.139161	0.141824	0.039036	0.192459	0.163327	0.264751	0.1945	0.145772	0.072051	0.0684756	0.0330694	0.0164495	0.0965556	0.00131915	0.107253	0.0271122	0.420671	0.0737159	0.0572005	0.00764484	0.0250066	0.0663808	0.0964264	0.200945	0.1119	0.0189192	0.117167	0.00714035	0.158172	0.0900616	0.0785224	0.0870688	0.129919
Otu82536	0	0	0	0	0	0	5.9522e-06	0	0	0	0	0	0	0	0	5.3455e-05	0	0	0	0	0	0	0	0	0	0	0	0	0	0	0	0	0	0	0	0	0	0	0	0	0	0	0	0	0	0	0	0	0
Otu86693	0	0	0	0	0	0	0	0	0	0	0.000131931	0	0	0	0	0	0	0	0	0	0	0	0	0	0	0	0	0	0	0	0	0	0	0	0	0	0	0	0	0	0	0	0	0	0	0	0	0	0
Otu88241	0	0	0	0	0	0	0	0	0	0	0	0	0	0	4.42229e-06	0	0	0	0	0	0	0	0	0	0	0	0	0	0	0	0	0	0	0	0	0	0	0	0	0	0	0	0	0	0	0	0	4.66057e-06	0
Otu89399	0	0	0	0	0	0	0	0	0	0	0	0	0	0	0	0	0	0	0	0	0	6.86819e-05	0	0	0	0	0	0	0	0	0	0	0	0	0	0	0	0	0	0	0	0	0	0	0	0	0	0	0
Otu95488	0	0	0	0	0	4.98137e-06	0	0	4.66342e-06	0	9.77264e-06	0	0	0	0	0	2.30536e-05	0.000142251	0	8.90024e-06	1.01019e-05	9.15759e-06	0	1.02203e-05	9.46607e-06	1.40204e-05	0	0	0	0	7.94467e-05	5.25893e-05	9.48344e-06	4.7357e-06	0	0	0	4.96231e-06	0.000101379	0.000191181	0.000144935	1.37261e-05	9.69246e-06	0	0	5.02828e-06	0	0	4.74989e-06
Otu95865	0	0	0	0	4.79543e-06	0	0	0	0	0	4.88632e-06	0	0	0	0	0	0	2.03216e-05	0	0	0	0	0	5.11015e-06	4.73303e-06	0	0	4.95317e-06	4.95742e-06	0	1.48962e-05	0	0	9.4714e-06	0	0	0	4.96231e-06	5.06894e-06	4.77952e-06	0	0	0	0	0	0	4.79614e-06	0	3.32493e-05
Otu96112	0	0	0	0	0	0	0	0	0	0	0	0	0	0	0	0	0	0	0	0	0	0	9.86057e-06	0	0	0	0	9.90634e-06	0	0	1.48962e-05	0	0	0	0	0	0	0	0	0	4.99775e-06	0	0	0	0	0	0	0	0
Otu97168	0	0	0	0	0	0	0	0	0	0	0	0	0	0	4.42229e-06	0	1.84429e-05	1.01608e-05	1.2999e-05	4.45012e-06	0	0	0	0	0	0	0	0	4.95742e-06	0	0	0	0	0	0	0	0	0	0	9.55904e-06	0	0	1.45387e-05	0	0	0	0	0	0
Otu97514	0	0	0	0	0	0	0	0	0	0	0	0	0	0	0	0	0	7.6206e-05	0	0	0	0	0	0	0	0	0	0	0	0	0	0	0	0	0	0	0	0	0	0	0	0	0	0	0	0	0	0	0
Otu97932	0	0	0	0	0	0	0	0	0	0	0	4.3351e-06	0	0	0	0	0	0	0	0	0	1.83152e-05	0	1.02203e-05	4.73303e-06	0	0	1.98127e-05	0	0	4.96542e-06	0	0	3.31499e-05	5.08585e-06	0	0	0	0	0	0	4.57538e-06	4.84623e-06	0	0	0	0	4.66057e-06	2.84994e-05
Otu982	3.70544e-05	1.93628e-05	1.42984e-05	0	5.27497e-05	4.48323e-05	5.9522e-06	6.47144e-05	1.39903e-05	0	8.30674e-05	6.50266e-05	2.77419e-05	0.000115607	0	0.000294002	0.000368857	3.55628e-05	9.9659e-05	0.000146854	0.000520247	0.000100734	0.000108466	0.000316829	0.000113593	9.34693e-06	0.00012092	0.000262518	2.97445e-05	1.92576e-05	3.47579e-05	9.08361e-05	4.74172e-05	0.000137335	4.57726e-05	0	0	0.00019353	0.000395377	2.86771e-05	7.9964e-05	2.74523e-05	6.78472e-05	9.48884e-06	8.96716e-06	0	0.000393283	1.86423e-05	6.17486e-05
Otu993	4.6318e-06	0	0	0	3.3568e-05	1.99255e-05	0	4.62246e-06	0	0	0.000122158	1.73404e-05	2.31183e-05	3.23701e-05	6.63344e-05	1.78183e-05	5.07179e-05	7.6206e-05	3.0331e-05	0.000182455	0.000176783	9.15759e-05	0.000207072	0.000112423	0.000189321	0.000186939	0.000286625	0.000237752	7.43612e-05	0.000115546	0.000143997	0.000162549	0.00016596	5.20927e-05	1.01717e-05	0	0	6.94724e-05	0.00490166	3.82362e-05	1.49933e-05	0	0.000164772	0	5.3803e-05	7.54243e-05	2.39807e-05	0.000172441	6.17486e-05
Klebsiella	0	6.77697e-05	0.000214476	0	0	2.49068e-05	5.9522e-06	4.62246e-06	0	0	0	0.000225425	0	0	0	0	4.61072e-06	0	0	8.90024e-06	5.05094e-06	0	0	0.000214626	0	0	0	0	0	0	1.48962e-05	0	0	4.7357e-06	0	0	1.01057e-05	0	0	0	0.000804638	0	8.23859e-05	0	2.24179e-05	0	0	0	4.74989e-06
Otu164682	0	0	0	0	0	4.98137e-06	0	0	0	0	0	0	0	0	0	0	0	0	0	0	0	0	0	6.64319e-05	0	0	0	0	0	0	0	0	0	4.7357e-06	0	0	0	0	0	0	0	0	0	0	0	0	0	0	0
Otu26491	0	6.77697e-05	0	0	0	0	0	0	0	0	0	0	0	0	0	0	0	0	0	0	0	0	0	0	0	0	0	0	0	0	0	0	0	0	0	0	0	0	0	0	0	0	0	0	0	0	0	0	0
Otu27011	0	0	0	0	0	0	0	0	0	0	0	0	0	0	0	0	0	0	0	0	0	0	0	0	0	0	0	0	0	0	1.48962e-05	0	0	0	0	0	0	0	0	0	4.99775e-06	0	8.23859e-05	0	4.48358e-06	0	0	0	0
Otu27470	0	0	0.000214476	0	0	0	0	0	0	0	0	9.53723e-05	0	0	0	0	0	0	0	0	0	0	0	5.11015e-06	0	0	0	0	0	0	0	0	0	0	0	0	0	0	0	0	9.9955e-06	0	0	0	1.34507e-05	0	0	0	4.74989e-06
Otu27566	0	0	0	0	0	0	0	0	0	0	0	0	0	0	0	0	0	0	0	0	0	0	0	2.04406e-05	0	0	0	0	0	0	0	0	0	0	0	0	5.05285e-06	0	0	0	0	0	0	0	0	0	0	0	0
Otu31781	0	0	0	0	0	0	0	0	0	0	0	0	0	0	0	0	0	0	0	0	0	0	0	0	0	0	0	0	0	0	0	0	0	0	0	0	0	0	0	0	0.000149933	0	0	0	0	0	0	0	0
Otu323111	0	0	0	0	0	0	0	0	0	0	0	0	0	0	0	0	0	0	0	4.45012e-06	5.05094e-06	0	0	0.000107313	0	0	0	0	0	0	0	0	0	0	0	0	0	0	0	0	0	0	0	0	0	0	0	0	0
Otu54086	0	0	0	0	0	4.98137e-06	0	0	0	0	0	0.000130053	0	0	0	0	0	0	0	0	0	0	0	5.11015e-06	0	0	0	0	0	0	0	0	0	0	0	0	0	0	0	0	2.49888e-05	0	0	0	4.48358e-06	0	0	0	0
Otu58495	0	0	0	0	0	0	0	0	0	0	0	0	0	0	0	0	0	0	0	0	0	0	0	0	0	0	0	0	0	0	0	0	0	0	0	0	5.05285e-06	0	0	0	4.99775e-06	0	0	0	0	0	0	0	0
Otu63681	0	0	0	0	0	0	0	0	0	0	0	0	0	0	0	0	0	0	0	0	0	0	0	0	0	0	0	0	0	0	0	0	0	0	0	0	0	0	0	0	0.00024489	0	0	0	0	0	0	0	0
Otu64693	0	0	0	0	0	1.49441e-05	0	0	0	0	0	0	0	0	0	0	4.61072e-06	0	0	0	0	0	0	5.11015e-06	0	0	0	0	0	0	0	0	0	0	0	0	0	0	0	0	0.000119946	0	0	0	0	0	0	0	0
Otu65833	0	0	0	0	0	0	0	0	0	0	0	0	0	0	0	0	0	0	0	0	0	0	0	0	0	0	0	0	0	0	0	0	0	0	0	0	0	0	0	0	9.49573e-05	0	0	0	0	0	0	0	0
Otu70222	0	0	0	0	0	0	5.9522e-06	4.62246e-06	0	0	0	0	0	0	0	0	0	0	0	4.45012e-06	0	0	0	5.11015e-06	0	0	0	0	0	0	0	0	0	0	0	0	0	0	0	0	0.000149933	0	0	0	0	0	0	0	0
Kluyvera	0.297523	0.628893	0.644151	0.129964	0.385864	0.339874	0.111854	0.480593	0.347877	0.208578	0.0954591	0.151616	0.0633857	0.182257	0.16925	0.0198095	0.0391542	0.139777	0.038867	0.0370072	0.0155468	0.00992225	0.0504319	0.11596	0.136193	0.05088	0.0395991	0.00137698	0.0163297	0.00285494	0.140611	0.0627343	0.0487781	0.276309	0.370886	0.363505	0.610632	0.175165	0.0916819	0.365256	0.106682	0.26755	0.0602241	0.00189777	0.0687737	0.0525657	0.062911	0.181883	0.0272454
Otu1003	9.26359e-06	5.80883e-05	4.76613e-06	1.85629e-05	0	2.49068e-05	1.19044e-05	0	0	5.67738e-05	0.000816015	6.06914e-05	0.00029129	0.000147978	2.65338e-05	4.45458e-06	1.38322e-05	0	3.8997e-05	0.000142404	0	4.5788e-06	1.97211e-05	1.53304e-05	4.73303e-05	1.86939e-05	0	0	0	4.8144e-06	0	4.78085e-06	0	2.36785e-05	4.06868e-05	0	0	9.92462e-06	5.06894e-06	4.77952e-06	3.9982e-05	9.15076e-06	0.00119702	0	8.96716e-06	2.51414e-05	6.7146e-05	0	9.49979e-06
Otu10595	0	0	0	0	0	0	0	4.62246e-06	1.39903e-05	0	4.88632e-06	0	0	4.6243e-06	0	0	0	0	0	0	0	0	0	0	0	0	0	0	0	0	0.000263167	0	0	0	0.000111889	9.09558e-06	5.05285e-06	0	0	0	0	4.57538e-06	0	0	0	0	0	0	0
Otu10663	0	0	4.76613e-06	0.000116018	0	0	0	0	1.39903e-05	0	0	0	0	0	0	0	0	0	0	0	0	0	0	0	0	0	0	0	0	0	0	0	0	0	1.01717e-05	8.6408e-05	5.05285e-06	1.98492e-05	0	0	0	0	0	0	8.96716e-06	0	2.39807e-05	0	0
Otu1068	5.55815e-05	3.38848e-05	3.33629e-05	0	0	4.98137e-06	1.78566e-05	2.31123e-05	0	0	0	3.46808e-05	0	2.31215e-05	0	0	0	1.01608e-05	0	2.67007e-05	0	0	0	0	0	0	0	0	0	0	0	0	0	9.4714e-05	0.000137318	2.2739e-05	0	0.000292776	0	0	0	0	0	0	0	0	1.43884e-05	0	0
Otu10824	1.38954e-05	0	0	6.49703e-05	9.59085e-06	4.98137e-06	0	4.62246e-06	0.000457015	3.78492e-05	0	0	0	0	1.32669e-05	4.45458e-06	0	0	0	0	0	0	0	0	0	0	0	0	0	0	0	0	0	0	3.05151e-05	0.000213746	0	4.96231e-06	0	4.77952e-06	0	8.69323e-05	4.84623e-06	0	0	0	0	0	0
Otu1122	0	0	0	4.64074e-06	4.79543e-06	9.96274e-06	5.9522e-06	0	3.26439e-05	4.73115e-05	0.000122158	0	2.31183e-05	0.00106359	0	0	3.2275e-05	0	9.5326e-05	1.33504e-05	3.03056e-05	0	0	0	4.73303e-06	0.000219653	3.13496e-05	0	4.95742e-06	0	0	0	0	0	0.000178005	0	0	2.48116e-05	0	2.86771e-05	0	9.15076e-06	0.00047493	0	4.48358e-06	3.5198e-05	4.79614e-06	6.99086e-05	0
Otu1132	4.6318e-06	0	4.76613e-06	4.64074e-06	0	0	5.9522e-06	0	0	4.73115e-05	0	5.63563e-05	0	0	0	0	4.61072e-05	0	1.2999e-05	0	0	0	0	5.11015e-06	0	0	0	0	0	0	0	0	0	0	3.56009e-05	0	0	0	0	0	0	0	0	0	8.96716e-06	0	4.79614e-06	0	0
Otu11327	4.6318e-06	0	0	0	0	0	0	0	0	0	0	0	0	0	0	0	0	0	0	0	0	0	0	0	0	0	0	0	0	0	9.43429e-05	0	0	0	0.000244121	0	5.05285e-06	4.96231e-06	0	0	0	0	0	0	0	0	0	0	0
Otu1141	3.70544e-05	3.38848e-05	1.42984e-05	4.17666e-05	4.79543e-06	4.98137e-06	1.19044e-05	4.62246e-06	0	0.00016559	7.32948e-05	0	4.16129e-05	4.6243e-05	0	1.78183e-05	4.61072e-06	0	5.1996e-05	0.000387161	0	1.37364e-05	0	0	4.73303e-06	0.000112163	3.13496e-05	0	1.48722e-05	0	0	0	0	9.4714e-06	3.05151e-05	0	0	1.48869e-05	1.52068e-05	4.77952e-06	4.99775e-06	3.20277e-05	0.000101771	0	1.34507e-05	2.01131e-05	0	0	0
Otu11561	0	0	0	0	0	0	0	0	0	0	0	0	0	0	4.42229e-06	0	0	0	0	0	0	0	0	0	0	0	0	0	0	0	0	0	0	0.000222578	0	0	0	9.92462e-06	0	0	0	0	0	0	0	0	0	0	0
Otu11786	0	0	0	0	0	0	0	0	0	0	0	0	0	0	0	0	0	0.000345467	0	0	0	0	0	0	0	0	0	0	0	0	0	0	0	0	3.05151e-05	0	0	4.96231e-06	0	0	0	0	0	0	0	0	0	0	0
Otu11810	0	4.84069e-06	0	0	0	0	0	0	0	0	0	0	0	0	0	0	0	0	0	0	0	0	0	0	0	0	0	0	0	0	0	0	0	0	0	8.18602e-05	0	0	0	0	0	0	0	0	0	0	0	0	0
Otu11868	9.26359e-06	2.42035e-05	9.53225e-06	4.64074e-06	4.79543e-06	4.98137e-06	7.14264e-05	1.38674e-05	9.32684e-06	0	0	0	0	9.2486e-06	0	0	9.22143e-06	0	0	8.90024e-06	0	0	0	1.02203e-05	1.89321e-05	0	0	0	0	0	0	0	0	0	0.000101717	0	1.01057e-05	0.000203455	0	9.55904e-06	4.99775e-06	4.57538e-06	0	0	0	0	0	0	0
Otu1188	9.26359e-06	0	4.76613e-06	4.64074e-06	0	2.98882e-05	0	0	0	1.89246e-05	1.95453e-05	4.3351e-06	0	0	0	0	3.2275e-05	0	0.000155988	4.45012e-05	0	2.2894e-05	0	0	0	9.34693e-06	1.79141e-05	0	4.95742e-06	0	0	0	0	4.7357e-06	5.08585e-06	0	5.05285e-06	2.97739e-05	5.06894e-06	2.38976e-05	0	4.57538e-06	9.69246e-06	0	0	0	9.59228e-06	2.79634e-05	0
Otu1192	0	0	0	0	4.79543e-06	0	0	0	0	0	0	4.3351e-06	0	0	0.000185736	0	1.84429e-05	2.5402e-05	0	0	0	0	0	0	0	0	0	0	0	0	1.48962e-05	0	0	7.10355e-05	1.52575e-05	0	0	0	0	0	0	0	0	0	0	0	0	0	0
Otu119232	0	4.84069e-06	0	0	0.000124681	0	0	0	4.66342e-06	0	0	0	0	0	0	0	0	0	0	0	0	0	0	0	0	0	0	0	0	0	0	0	0	0	0	0	0	0	0	0	0	0	0	0	0	0	0	0	0
Otu11937	0	0	9.53225e-06	0	0	0	0	4.62246e-06	4.66342e-06	0	0	0	0	0	0	0	0	2.5402e-05	0	0	0	0	0	0	0	0	0	0	0	0	0	0	0	0	0	9.09558e-06	1.01057e-05	0.000248116	0	0	0	0	0	0	0	0	0	0	0
Otu119501	0	4.84069e-06	9.53225e-06	0	5.27497e-05	0	0	9.24492e-06	0	0	0	0	0	0	0	0	0	0	0	0	0	0	0	0	0	0	0	0	0	0	0	0	0	0	0	0	0	0	0	4.77952e-06	0	0	0	0	0	0	0	0	0
Otu1196	0	0	0	4.64074e-06	0	0	0	0	0	1.41935e-05	0	8.67021e-06	0	0	0	0	0	0	0	0	0	0	0	5.11015e-06	0	0	0	0	0	0	0	0	0	0	0	0	0	0	0	0	0	4.57538e-06	0	0	0	8.04525e-05	0	0	0
Otu119753	9.26359e-06	9.68139e-06	2.85968e-05	9.28147e-06	0	9.96274e-06	0	2.31123e-05	6.99513e-05	0	0	0	0	1.38729e-05	4.42229e-06	0	0	1.01608e-05	0	0	0	0	0	0	0	0	0	0	0	0	4.96542e-06	0	0	0	4.06868e-05	2.2739e-05	0	2.48116e-05	0	4.77952e-06	0	0	0	0	0	0	0	0	0
Otu120603	0	0	1.42984e-05	0	0	0	0	0	0	0	0	1.73404e-05	0	0	1.32669e-05	0	0	0	0	0	0	0	0	0	4.73303e-06	0	0	0	0	0	0	0	0	0	0	0	0	9.92462e-06	0	0	0	0	0	0	0	0	0	0	0
Otu12075	0	0	0	0	0	0	0	9.24492e-06	1.39903e-05	0	0	0	0	0	0	0	0	0	0	0	0	0	0	0	0	0	0	4.95317e-06	0	0	0	0	0	4.7357e-06	5.08585e-06	4.54779e-06	5.05285e-06	0	0	0	0	0	0	0	0	0	0	0	0
Otu120906	0	4.84069e-06	0	0	0	0	0	0	0	0	0	0	0	0	0	0	0	0	0	0	0	0	0	0	0	0	0	0	0	0	0	0	0	4.7357e-06	0.000254292	0	0	0	0	0	0	0	0	0	0	0	0	0	0
Otu121593	0	0	6.19596e-05	0	0	0	0	0	0	0	0	0	0	0	0	0	0	0	0	0	0	0	0	0	0	0	0	0	0	0	0	0	0	0	0	0	0	0	0	0	0	0	0	0	0	0	0	0	0
Otu12350	0	0	0	0	0	0	0	0	0	0	0	0	0	0	0	0	0	0	0	0	0	4.5788e-06	0	0	0	9.34693e-06	0	0	0	0	0	0	0	4.7357e-06	0	0	0	0	0	0	0	0	0	0	0	0	0.0001247	0	0
Otu12397	9.26359e-06	4.84069e-06	1.90645e-05	1.39222e-05	0	4.98137e-06	0	2.31123e-05	9.32684e-06	0	0	0	0	0	4.42229e-06	0	4.61072e-06	0	0	8.90024e-06	0	0	0	1.02203e-05	0	0	0	0	0	0	0	0	0	0	0	5.45735e-05	0	0	0	1.91181e-05	0	0	0	0	0	0	0	0	0
Otu12409	0	0	4.76613e-06	0	1.43863e-05	4.98137e-06	0	4.62246e-06	6.52878e-05	0	0	4.3351e-06	0	0	8.84459e-06	0	0	0	0	0	0	0	0	0	0	0	0	0	0	0	0	0	0	0	0.000218692	2.2739e-05	5.05285e-06	7.9397e-05	0	0	0	9.15076e-06	4.84623e-06	0	0	0	0	0	0
Otu12428	0	0	1.42984e-05	4.64074e-06	1.43863e-05	4.98137e-06	1.19044e-05	4.16021e-05	1.39903e-05	0	0	4.3351e-06	0	0	0	0	0	0	0	0	0	0	0	0	0	0	0	0	0	0	0	0	0	0	5.08585e-06	1.81912e-05	0	0.000158794	0	0	0	0	0	0	0	0	0	0	0
Otu12603	0	4.84069e-06	4.76613e-06	0.000255241	4.79543e-06	1.49441e-05	1.19044e-05	0	4.66342e-06	4.73115e-06	0	0	0	0	0	0	0	0	4.333e-06	0	0	0	0	0	0	0	0	0	0	0	0	0	0	0	0	0	0	0	0	0	0	0	0	0	0	0	0	0	0
Otu12613	0.000125058	5.80883e-05	3.8129e-05	2.32037e-05	0	1.49441e-05	1.19044e-05	6.47144e-05	4.66342e-05	0	0	0	0	1.38729e-05	1.32669e-05	0	0	1.01608e-05	0	0	0	0	0	0.000127754	0	0	0	0	0	0	0	0	0	1.89428e-05	4.06868e-05	2.2739e-05	5.05285e-06	0.000263002	0	0	0	9.15076e-06	0	0	8.96716e-06	2.51414e-05	0	0	0
Otu126131	4.6318e-06	4.84069e-06	0	0	0	0.000184311	0	0	4.66342e-06	0	0	0	0	0	0	0	0	0	0	0	0	0	0	0	0	0	0	0	0	0	0	0	0	0	0	0	0	0	0	0	0	0	0	0	0	0	0	0	0
Otu12681	4.6318e-06	4.84069e-06	0	1.39222e-05	9.59085e-06	0.000104609	0	0	1.86537e-05	0	0	0	0	0	0	0	0	0	0	0	0	0	0	0	0	0	0	0	0	0	0	0	0	0	0	0.000159173	0	3.96985e-05	0	0	4.99775e-06	0	0	0	0	2.01131e-05	0	0	0
Otu1269	9.26359e-06	1.45221e-05	4.76613e-06	4.64074e-06	0	0	0	2.31123e-05	0	0	0	4.3351e-06	0	0	0	8.90916e-06	0	0.000228618	0	0	0	0	0	5.11015e-06	0	0	0	0	0	0	0	0	0	0	1.52575e-05	2.2739e-05	0	1.98492e-05	0	0	0	0	4.84623e-06	0	0	0	0	0	0
Otu12701	4.6318e-06	9.68139e-06	0	8.35333e-05	4.79543e-06	0	0	0	6.06244e-05	0	9.77264e-06	0	0	0	0	0	0	5.0804e-06	0	0	0	0	0	0	0	0	0	0	0	0	9.93083e-06	0	0	0	0.0014749	9.55036e-05	0	0.00051608	1.01379e-05	0	4.99775e-06	0.000388907	0	0	0	0	0	0	0
Otu127753	0	4.84069e-06	0	0	0	0	0	0	0	0	0	0	0	6.93645e-05	0	0	0	0	0	0	0	0	0	0	0	0	0	0	0	0	0	0	0	0	0	0	0	0	0	0	0	0	0	0	0	0	0	0	0
Otu1278	0	0	0	2.78444e-05	0	0	5.9522e-06	0	0	6.62361e-05	0	4.3351e-06	0	0	1.32669e-05	4.45458e-06	4.61072e-06	0	8.666e-06	0	0	2.74728e-05	0	0	0	0.000331816	0	0	0	0	0	0	0	4.7357e-06	0	0	5.05285e-06	4.96231e-06	0	5.25747e-05	0	0	4.84623e-06	0	0	5.02828e-06	0	4.66057e-06	0
Otu13074	0	0	0	0	0	0	5.9522e-06	0	0	9.4623e-06	0	0	0	0	0	0	0	0	0	7.12019e-05	0	0	0	0	1.41991e-05	4.67347e-06	0	0	0	0	0	0	0	0	0	0	0	0	1.01379e-05	0	0	0	0.000353775	0	0	0	0	0	0
Otu13148	0	0	9.53225e-06	4.64074e-06	0	0	5.9522e-06	4.62246e-06	9.32684e-06	0	0	0	0	0	0	0	0	0.000330226	0	0	0	0	0	0	0	0	0	0	0	0	0	0	0	0	2.54292e-05	9.09558e-06	5.05285e-06	0	0	0	0	1.37261e-05	0	0	0	0	0	0	0
Otu13149	4.6318e-06	1.93628e-05	3.33629e-05	0	4.79543e-06	4.98137e-06	0	9.24492e-06	9.32684e-06	0	0	0	0	9.2486e-06	0	0	0	1.52412e-05	0	0	0	0	0	1.02203e-05	0	0	0	0	0	0	0	0	0	4.7357e-06	2.03434e-05	0.000113695	0	1.48869e-05	0	0	0	0	0	0	0	0	0	0	0
Otu132289	4.6318e-06	0	4.76613e-06	0	1.43863e-05	0	0	0	0	4.73115e-06	0	4.3351e-06	0	0	0	0	0	0	0	4.45012e-06	0	4.5788e-06	0	0	5.67964e-05	0	0	0	0	0	0	0	0	0	0	0	0	0	0	0	0	0	0	0	0	0	0	0	0
Otu132410	0	4.84069e-06	9.53225e-06	0	0	4.98137e-06	0	0	0	0	0	0	0	0	0	0	0	0	0	0	0	0	0	0	4.73303e-06	0	0	0	0	0	0	0	0	4.7357e-06	0	0	0	0	0	0	0	0	0	0	0	0	0	0	0
Otu1327	4.6318e-06	0	0	0	4.79543e-06	0	5.9522e-06	0	0	2.36558e-05	0	0	2.31183e-05	0	4.42229e-06	0	1.38322e-05	0	0	8.90024e-06	0	0	0	0	4.73303e-06	0	0	0	0	0	0	0	0	0	5.08585e-06	0	0	9.92462e-06	0	0	5.49753e-05	4.11784e-05	0	0	0	0	4.79614e-06	0	0
Otu133888	0	0	0	0	0	0	0	4.62246e-06	0	0	0	0	0	0	0	0	0	0	0	0	0	0	0	0	0	0	0	0	0	0	0	0	0	0	0	0	0	0	0	0	0	0	0	0	0	0	0	0	0
Otu1365	1.85272e-05	9.68139e-06	1.42984e-05	0	4.79543e-06	4.98137e-06	0	1.38674e-05	5.12976e-05	0	0	0	0	0	4.42229e-06	0	0	0	0	0	0	0	0	0	0	0	0	0	0	0	0	0	0	9.4714e-06	1.52575e-05	5.45735e-05	0	1.98492e-05	0	9.55904e-06	0	0	0	0	0	0	0.000105515	0	0
Otu136923	4.6318e-06	4.84069e-06	4.76613e-06	9.28147e-06	0	0	0	0	0	8.51607e-05	0	0	4.62366e-06	0	8.84459e-06	0	0	5.0804e-06	0	4.45012e-06	0	0	0	0	0	0	0	0	9.91483e-06	0	0	0	0	4.7357e-06	0	0	0	0	0	0	0	0	9.69246e-06	0	4.48358e-06	5.02828e-06	0	4.66057e-06	0
Otu1370	4.6318e-06	0	4.76613e-06	0	0	0	0	0	1.39903e-05	0	0	0	0	0	0	0	0	0	0	1.33504e-05	0	0	0	0	0	0	0	0	0	0	0	0	0	0	6.6116e-05	0	0	1.98492e-05	0	0	0	0	0	0	0	0	0	0	0
Otu137668	4.6318e-06	0	0	0	0	0	0	2.31123e-05	0	0	0	0	0.000110968	0	8.84459e-06	0	0	0	0	0	0	0	0	0	0	0	0	0	0	0	0	0	0	0	5.08585e-06	0	0	0	0	1.43386e-05	0	0	0	0	0	0	0	0	0
Otu137698	0	0	4.76613e-06	0	0	0	0	0	6.52878e-05	0	0	4.3351e-06	0	0	0	0	0	0	0	0	0	0	0	0	0	0	0	0	0	0	0	0	0	0	0	0	1.51586e-05	9.92462e-06	0	0	0	0	0	0	0	0	0	0	0
Otu1379	9.26359e-06	1.45221e-05	3.33629e-05	0.00146647	2.39771e-05	4.48323e-05	5.9522e-06	4.16021e-05	0.000130576	0	0	0	0	0	4.42229e-06	0	0	2.03216e-05	0	0	0	0	4.93029e-06	0	0	0	0	0	0	0	5.46196e-05	0	0	9.4714e-06	0.000162747	0.000304702	1.01057e-05	0.000337437	0	0	0	0	9.69246e-06	0	0	5.02828e-06	4.79614e-06	0	0
Otu139488	0	0	0	0	4.79543e-06	0	0	0	0.000116585	0	0	0	0	0	0	0	0	5.0804e-06	0	0	0	0	0	0	0	0	0	0	0	0	0	0	0	0	0	1.36434e-05	0	0	0	0	0	0	0	0	0	0	0	0	0
Otu14024	2.3159e-05	0	2.85968e-05	0.000194911	4.31588e-05	0.000239106	0.000208327	0.000143296	0.00017721	0	1.4659e-05	0	2.77419e-05	0.000194221	0	4.45458e-06	0	0.00137171	0	4.45012e-05	0	0	0	0	0	0	0.00024184	0	0	0	5.46196e-05	0	0	9.4714e-06	9.66311e-05	6.36691e-05	5.05285e-06	3.47362e-05	3.04136e-05	0	6.49708e-05	0.0066526	0	0	0.000277982	0	2.39807e-05	5.12663e-05	0
Otu14028	2.3159e-05	1.45221e-05	1.42984e-05	0.000134581	4.79543e-06	1.99255e-05	1.19044e-05	3.23572e-05	0.000233171	2.36558e-05	0	8.67021e-06	0	1.38729e-05	8.84459e-06	0	0	0.000533442	2.1665e-05	1.78005e-05	0	4.5788e-06	0	0.000173745	0	0	0	0	4.95742e-06	0	0.000516403	0	0	0	0.00168342	0.00166904	1.01057e-05	0.0501987	0	7.16928e-05	0	0.000173865	0	0	0	5.02828e-05	7.67382e-05	0	0
Otu14032	4.6318e-06	3.87255e-05	1.90645e-05	0.000213474	0	4.48323e-05	0	6.47144e-05	0.000284468	9.4623e-06	0	0	0	1.38729e-05	4.42229e-06	0	0	0.000294663	0	2.67007e-05	0	9.15759e-06	0	1.02203e-05	0	4.67347e-06	3.58282e-05	0	0	0	0	0	0	4.7357e-06	0.00074762	0.000154625	5.05285e-06	3.96985e-05	0	4.77952e-06	0	4.11784e-05	4.84623e-06	0	0	0	2.39807e-05	0	0
Otu14065	4.6318e-06	2.90442e-05	2.38306e-05	5.10481e-05	9.59085e-06	0.000124534	2.38088e-05	4.62246e-05	1.39903e-05	0	0	0	1.3871e-05	1.38729e-05	4.42229e-06	0	0	1.52412e-05	0	0	0	0	0	0	0	0	0	0	0	0	0	0	0	1.42071e-05	2.54292e-05	0.000100051	0	9.92462e-05	0	4.77952e-06	0	0	0	0	0	5.02828e-06	0	0	0
Otu14081	3.24226e-05	3.87255e-05	9.53225e-06	6.49703e-05	2.39771e-05	0.000214199	0	5.54695e-05	9.79318e-05	4.73115e-06	9.77264e-06	8.67021e-06	9.24731e-06	4.6243e-06	2.21115e-05	0	0	5.0804e-05	0	0	5.05094e-06	0	0	0	0	0	0	0	0	0	0	0	0	2.36785e-05	0.000233949	0.000109147	0.000116216	4.96231e-05	5.06894e-06	1.43386e-05	0	1.83015e-05	4.84623e-06	0	1.34507e-05	1.50849e-05	2.39807e-05	0	0
Otu14089	9.26359e-06	9.68139e-06	9.53225e-06	0.000129941	4.79543e-06	0.000189292	4.76176e-05	0.000106317	0.000125912	0	4.88632e-06	0	4.62366e-06	1.84972e-05	4.42229e-06	0	0	0.000213377	0	0	0	0	0	3.5771e-05	0	0	0	0	0	0	0	4.78085e-06	0	9.4714e-06	9.15453e-05	0.00012279	1.51586e-05	0.000109171	5.06894e-06	4.77952e-06	0	4.57538e-06	0	0	0.000210728	5.02828e-06	9.59228e-06	0	0
Otu14092	1.85272e-05	0	1.90645e-05	7.88925e-05	0	2.49068e-05	1.19044e-05	1.38674e-05	0.000186537	0	0	0	0	2.77458e-05	2.21115e-05	0	0	0	0	4.45012e-06	0	3.66304e-05	0	0	4.73303e-06	0	0	0	0	0	0.000104274	0	0	1.42071e-05	0.000223777	0.00043204	0	8.93216e-05	0	9.55904e-06	0	0.000141837	0	0	0	2.51414e-05	4.79614e-06	0	0
Otu14103	4.6318e-06	0	0	4.64074e-06	1.91817e-05	0	0	0	0	3.78492e-05	4.88632e-06	4.3351e-06	4.62366e-06	0	4.42229e-06	0	0	0	0	0	0	1.83152e-05	0	0	8.04616e-05	9.34693e-06	0	0	0	0	0	0	0	0	0	4.54779e-06	0	0	5.06894e-06	0	0	0	0	0	0	0	0	0	4.74989e-06
Otu14109	0	5.32476e-05	9.53225e-06	1.39222e-05	0	1.99255e-05	1.19044e-05	4.62246e-06	0.000107259	6.62361e-05	0.000552154	0	4.62366e-06	2.77458e-05	0	4.45458e-06	3.2275e-05	0	4.333e-06	3.5601e-05	0	0	0	1.02203e-05	0	0.00103284	4.47852e-06	0	9.91483e-06	0	4.96542e-06	0	0	9.4714e-06	2.54292e-05	0	0	4.46608e-05	0	8.60314e-05	0	6.86307e-05	2.90774e-05	0	4.48358e-06	5.02828e-06	0	4.66057e-06	0
Otu14118	1.85272e-05	0	1.90645e-05	4.64074e-06	9.59085e-06	6.97392e-05	0	9.24492e-06	2.33171e-05	0	0	0	9.24731e-06	4.6243e-06	4.42229e-06	0	0	5.0804e-06	0	0	0	0	0	0	0	0	0	0	0	0	0	0	0	3.78856e-05	2.03434e-05	2.2739e-05	1.01057e-05	1.48869e-05	0	4.77952e-06	4.99775e-06	0	0	0	0	1.50849e-05	1.91846e-05	2.33029e-05	0
Otu14128	2.3159e-05	1.45221e-05	2.85968e-05	2.78444e-05	9.59085e-06	1.99255e-05	5.9522e-06	6.0092e-05	8.39415e-05	0	0	0	0	0	0	0	0	2.03216e-05	0	0	0	0	0	5.11015e-06	0	0	0	0	0	0	4.96542e-06	0	0	1.89428e-05	9.66311e-05	0.000104599	1.01057e-05	4.96231e-05	0	0	0	9.6083e-05	0	4.74442e-06	4.48358e-06	5.02828e-06	0	0	0
Otu14148	2.77908e-05	9.68139e-06	4.76613e-05	7.42518e-05	1.91817e-05	8.46833e-05	1.78566e-05	4.62246e-05	7.92781e-05	0	9.77264e-06	4.3351e-06	4.62366e-06	1.84972e-05	4.42229e-06	2.22729e-05	4.61072e-06	4.06432e-05	0	0	0	0	0	1.02203e-05	0	0	0	0	0	0	0	0	0	2.84142e-05	3.56009e-05	0.000127338	2.02114e-05	7.44347e-05	5.06894e-06	1.91181e-05	4.99775e-06	9.15076e-06	1.93849e-05	0	1.79343e-05	0	9.59228e-06	4.66057e-06	0
Otu14186	1.85272e-05	0	4.76613e-06	0	4.79543e-06	9.96274e-06	0	6.47144e-05	2.33171e-05	0	4.88632e-06	0	4.62366e-06	1.84972e-05	0	0	0	0	0	8.90024e-06	0	0	0	5.11015e-06	0	0	0	0	4.95742e-06	0	1.48962e-05	0	0	0	3.05151e-05	0.000177364	0	4.46608e-05	0	0	0	0	0	0	0.000138991	0	1.91846e-05	0	0
Otu14201	0	4.84069e-06	0	0	0	2.98882e-05	0	4.62246e-06	2.79805e-05	0	4.88632e-06	0	0	0	0	0	0	1.01608e-05	0	0	0	0	0	0	0	0	0	0	0	0	0	0	0	0	1.52575e-05	0.000140982	1.51586e-05	9.92462e-06	0	4.77952e-06	0	4.57538e-06	0	0	0	0	0	0	0
Otu14209	9.26359e-06	9.68139e-06	0	4.17666e-05	3.3568e-05	0	0	0	0	5.67738e-05	0.000175908	4.3351e-06	0	4.6243e-06	0	0	1.38322e-05	0	2.5998e-05	4.45012e-06	0	4.5788e-06	0	0	0	9.34693e-06	0	0	0	0	0	0	0	9.4714e-06	0	0	0	0	0	0	0	9.15076e-06	1.93849e-05	0	0	5.02828e-06	0	4.66057e-06	0
Otu14214	1.85272e-05	5.80883e-05	1.90645e-05	6.96111e-05	9.59085e-06	4.98137e-05	1.19044e-05	0.000101694	0.000107259	0	4.88632e-06	1.30053e-05	0	1.38729e-05	4.42229e-06	0	0	3.04824e-05	0	4.45012e-06	0	0	0	1.02203e-05	0	0	0	0	0	0	0	0	0	9.4714e-06	5.08585e-05	9.09558e-05	4.04228e-05	7.44347e-05	5.06894e-06	2.38976e-05	4.99775e-06	9.15076e-06	4.84623e-06	0	0	0	0	0	0
Otu14225	9.26359e-06	0	9.53225e-06	1.39222e-05	4.79543e-06	9.96274e-06	8.33309e-05	1.38674e-05	1.86537e-05	0	4.88632e-06	0	4.62366e-06	0	4.42229e-06	0	0	0	0	4.45012e-06	0	0	0	0	0	0	0	0	0	0	0	0	0	4.7357e-06	7.62877e-05	4.54779e-05	5.05285e-06	2.97739e-05	0	0	0	0	0	0	0	0	0	0	0
Otu14321	3.70544e-05	1.45221e-05	5.71935e-05	1.39222e-05	1.43863e-05	0.00047323	0.000654742	0.000110939	4.19708e-05	4.73115e-06	4.88632e-06	0	0	4.6243e-06	8.84459e-06	0	4.61072e-06	2.03216e-05	0	2.67007e-05	0	0	0	5.11015e-06	1.41991e-05	0	0	0	0	0	0	0	0	0	0.000183091	0.000113695	3.03171e-05	0.000178643	0	4.77952e-06	0	1.83015e-05	0	0	4.48358e-06	0	1.43884e-05	0	0
Otu1434	3.24226e-05	4.84069e-06	0	2.32037e-05	0	1.99255e-05	5.9522e-06	0	4.66342e-06	9.4623e-05	4.88632e-06	0	1.3871e-05	4.6243e-06	0	0	4.61072e-06	0	8.666e-06	0	0	0	0	1.02203e-05	0	0	4.47852e-06	0	4.95742e-06	0	0	0	0	4.7357e-06	0.000127146	0	0	0	5.06894e-06	0	0	0	9.69246e-06	4.74442e-06	0	1.00566e-05	0	9.32114e-06	0
Otu14351	1.85272e-05	1.93628e-05	1.90645e-05	3.24852e-05	0	2.98882e-05	0	5.08471e-05	9.79318e-05	0	0	4.3351e-06	0	4.6243e-06	1.76892e-05	0	0	3.04824e-05	0	0	0	0	0	0	0	0	0	0	0	0	0	0	0	1.42071e-05	3.05151e-05	4.09301e-05	1.51586e-05	4.96231e-05	0	1.91181e-05	0	9.15076e-06	0	0	0	0	0	0	0
Otu14359	1.85272e-05	0	1.42984e-05	4.64074e-05	1.91817e-05	4.98137e-06	5.9522e-06	0	1.86537e-05	7.09673e-05	2.44316e-05	1.30053e-05	4.62366e-06	4.6243e-06	8.84459e-06	8.90916e-06	9.22143e-06	0	1.7332e-05	8.90024e-06	1.51528e-05	9.15759e-06	4.93029e-06	0	4.73303e-06	4.67347e-06	0	0	9.91483e-06	0	0	0	0	0	5.08585e-06	0	5.05285e-06	4.96231e-06	5.06894e-06	0	0	4.57538e-06	1.45387e-05	0	1.79343e-05	0	4.79614e-06	0	4.74989e-06
Otu14403	4.6318e-06	9.68139e-06	0	1.85629e-05	0	9.96274e-06	7.14264e-05	2.77348e-05	0.000289132	4.73115e-06	0	4.3351e-06	0	0	0	0	0	5.0804e-06	0	0	0	0	0	0	0	0	1.79141e-05	0	0	0	4.96542e-06	0	0	4.7357e-06	1.52575e-05	9.09558e-05	5.05285e-06	9.92462e-06	0	1.91181e-05	0	9.15076e-06	0	0	1.34507e-05	5.02828e-06	0	0	0
Otu14491	2.3159e-05	1.93628e-05	3.33629e-05	0.000352696	1.43863e-05	9.96274e-05	2.38088e-05	2.77348e-05	6.52878e-05	0	0	0	0	2.31215e-05	4.42229e-06	8.90916e-06	4.61072e-06	3.55628e-05	2.5998e-05	0	0	0	0	1.02203e-05	9.46607e-06	0	0	0	0	0	3.97233e-05	0	0	0	0.000264464	0.000209198	2.02114e-05	0.000307663	5.06894e-06	0	9.9955e-06	1.83015e-05	0	0	1.34507e-05	5.02828e-06	0	0	0
Otu14640	2.77908e-05	0	4.28951e-05	0	0	9.96274e-06	0	0	0	1.89246e-05	0	0	0	0	8.84459e-06	0	0	2.5402e-05	5.1996e-05	0	0	4.5788e-06	2.95817e-05	2.55507e-05	0	4.67347e-06	0	0	0	0	0	0	0	9.4714e-06	0.00012206	0	1.01057e-05	0	0	4.77952e-06	0	0	9.69246e-06	0	0	0	0	4.66057e-06	0
Otu150052	0	0	0	4.64074e-06	0	0	0	0	0	0	0	0	0	0	0	0	0	0	0	0	0	0	0	0	0	0	0	0	0	0	0	0	0	0	0	0	0	0	0	0	0	0	0	0	0	0	9.11267e-05	0	0
Otu15014	4.6318e-06	1.93628e-05	4.76613e-06	4.64074e-06	0	4.98137e-06	0	1.84898e-05	8.39415e-05	0	0	0	0	0	0	0	0	0	0	0	0	0	0	0	0	0	0	0	0	0	4.96542e-06	0	0	0	3.05151e-05	3.18345e-05	0	1.48869e-05	0	0	0	0	0	0	0	0	0	0	0
Otu15055	0	4.84069e-06	9.53225e-06	0	0	9.96274e-06	0	4.62246e-06	0	0	0	0	0	0	0	0	0	0	0	0	0	0	0	0	0	0	0	0	0	0	0.00223444	0	0	0	0	0	0	0	0	0	0	0	0	0	0	0	0	0	0
Otu15134	0	0	0	9.28147e-06	0	0	0	0	0	9.4623e-06	0	0	0	0	0	0	0	0	0	0	0	0	0	0	0	2.33673e-05	0	0	0	0	0	0	0	0.000175221	0	0	0	0	0	0	0	0	0	0	0	0	0	0	0
Otu151406	0	0	0	0	0	0	0	0	0	0	0	0	0	0	0	0	0	0	0	0	0	0	0	0	0	0	0	0	0	0	0	0	0	0	0	0	5.05285e-06	0	0	6.21338e-05	0	0	0	0	0	0	0	0	0
Otu15315	1.85272e-05	1.93628e-05	4.76613e-06	9.28147e-06	0	0	0	4.62246e-06	0	4.73115e-06	0	0	0	9.2486e-06	0	0	0	5.0804e-06	0	0	0	0	0	0	9.46607e-06	0	0	0	0	0	9.93083e-06	0	0	4.7357e-06	5.08585e-06	3.18345e-05	0	0.000143907	0	0	0	0	4.84623e-06	0	0	0	4.79614e-06	0	0
Otu1548	0	0	0	0	0	0	0	0	0	1.41935e-05	0	0	0	0	0	0	0	0	0	0	0	0	0	0	0	0	0	0	0	0	0	0	0	0	7.12019e-05	0	0	0	0	0	0	0	0	0	0	0	0	0	0
Otu155215	0	0	0.000438484	0	0	0	0	0	4.66342e-06	0	0	0	0	0	0	0	0	0	0	0	0	0	0	0	0	0	0	0	0	0	0	0	0	0	0	0	0	0	0	0	0	0	0	0	0	0	0	0	0
Otu156124	0	0	0	2.32037e-05	0	0	0	0	0	0	0	0	0	0	0	0	0	0	0	0	0	0	0	0	0	0	0	0	0	0	0	0	0	0	5.08585e-06	4.54779e-06	1.01057e-05	9.92462e-06	0	4.77952e-06	0	0	0	0	0	0	0	0	0
Otu15654	2.77908e-05	4.35662e-05	1.90645e-05	4.64074e-06	0	0.000174348	0	5.54695e-05	3.26439e-05	4.73115e-06	0	0	0	1.84972e-05	4.42229e-06	0	0	0.000193055	0	0	0	0	0	5.11015e-06	0	0	4.47852e-06	0	0	0	0	0	0	4.7357e-06	2.03434e-05	0	5.05285e-06	2.97739e-05	0	1.43386e-05	0	4.57538e-06	4.84623e-06	0	0	5.02828e-06	4.79614e-06	0	4.74989e-06
Otu160924	0	0	0	0	0	0	0	0	0.000116585	0	0	0	0	0	0	0	0	0	0	0	0	0	0	0	0	0	0	0	0	0	0	0	0	0	0	4.54779e-06	0	0	0	0	0	0	0	0	0	0	0	0	0
Otu161750	0	0	0	0	0	0	0	0	0	0	0	0	0	0	0	0	0	0	0	0	0	0	0	0	0	0	0	0	0	0	0	0	0	0	0	0	0.00014148	0	0	4.77952e-06	0	0	0	0	0	0	0	0	0
Otu166009	0	0	0	4.64074e-05	0	4.98137e-06	0	0	0	2.83869e-05	0	0	9.24731e-06	0	0	0	0	0	0	0	0	4.5788e-06	0	0	4.73303e-06	0	4.47852e-06	0	0	0	0	0	0	0	1.52575e-05	0	0	0	0	0	0	0	0	0	0	5.02828e-06	0	0	0
Otu16611	0	0	4.76613e-06	0	4.79543e-06	9.96274e-06	0	9.24492e-06	0	0	0	0	0	0	0	0	0	0	0	2.67007e-05	0	0	0	0	1.41991e-05	0	0	0	0	0	0	0	0	0	2.03434e-05	3.18345e-05	9.09514e-05	0	0	0	0	0	0	0	0	0	0	0	0
Otu16721	0	0	0	0	0	4.98137e-06	0	0	9.32684e-06	0	0	1.30053e-05	0	0	0	0	0	0	4.333e-06	0	0	0	0	0	4.73303e-06	0	0	0	0	0	0	0	0	4.7357e-06	0	0	7.07399e-05	0	0	0	0	0	0	0	0	0	0	0	0
Otu16925	4.6318e-06	4.84069e-06	9.53225e-06	2.32037e-05	0	2.49068e-05	0	6.93369e-05	8.86049e-05	0	0	0	0	0	0	0	0	1.52412e-05	0	0	5.05094e-06	0	0	1.53304e-05	4.73303e-06	0	0	0	0	0	0	0	0	0	0	4.54779e-06	5.05285e-06	9.92462e-06	0	0	4.99775e-06	4.57538e-06	4.84623e-06	0	0	0	0	0	0
Otu1705	0	0	0	0	0	0	0	0	0	0	0	0	0	0	6.63344e-05	0	0	0	0	0	0	0	0	0	0	0	0	0	0	0	1.48962e-05	0	0	9.4714e-06	0	0	0	9.92462e-06	0	0	0	0	0	0	0	0	0	0	4.74989e-06
Otu17285	4.6318e-06	0	0	0.0002506	4.79543e-06	4.98137e-05	0	0	8.39415e-05	0	0	0	0	0	0	0	0	0.000106688	0	0	0	0	0	6.64319e-05	1.89321e-05	0	0	0	1.98297e-05	0	0.000104274	0	0	0	0.000157661	0.000318345	0	0.000124058	0	0	0	7.77815e-05	4.84623e-06	0	0	3.5198e-05	0	0	0
Otu17306	4.6318e-06	9.68139e-06	1.90645e-05	0.000129941	3.3568e-05	9.96274e-06	0	4.62246e-05	3.73073e-05	0	0	0	4.62366e-06	0	4.42229e-06	0	0	7.6206e-05	0	0	0	0	4.93029e-06	5.11015e-06	0	0	0	0	0	0	0	0	0	0	0.000111889	4.09301e-05	5.05285e-06	1.98492e-05	0	0	0	9.15076e-06	0	0	0	0	0	0	0
Otu174731	0	0	0	0	0	0	0	0	0	0	0	0	0	0	0	6.23641e-05	0	0	0	0	0	0	0	0	0	0	0	0	0	0	0	0	0	0	0	0	0	0	0	0	0	0	0	0	0	0	0	0	0
Otu1763	4.6318e-06	9.68139e-06	4.76613e-06	0	0	0	0	0	1.86537e-05	0	0	0	0	0	0	0	0	5.0804e-06	0	0	0	0	0	5.11015e-06	0	0	0	0	0	0	0	0	0	0	0.000401782	0.000136434	0	9.92462e-06	0	4.77952e-06	0	0	0	0	0	5.02828e-06	0	0	0
Otu17806	0	0	1.42984e-05	0	0	6.97392e-05	0	0	0	0	0	0	0	0	0	0	0	0	0	0	0	0	0	0	0	0	0	0	0	0	0	0	0	0	0	0	0	4.96231e-06	0	4.77952e-06	0	9.15076e-06	0	0	0	0	0	0	0
Otu178394	9.26359e-06	0	0	9.28147e-06	0	0	0	0	0	5.20427e-05	0	4.3351e-06	0	4.6243e-06	0	0	0	0	0	0	0	0	4.93029e-06	0	9.46607e-06	0	0	0	0	0	0	0	0	4.7357e-06	5.08585e-06	0	5.05285e-06	0	0	0	0	4.57538e-06	0	0	0	0	0	0	0
Otu178977	0	0	0	0	0	0	0	4.62246e-06	0	0	0	0	0	4.6243e-06	0	0	0	0	0	0	0	0	0	0	0	0	0	0	0	0	0	0	0	0	0	0	1.01057e-05	0	0	6.69133e-05	0	0	0	0	0	0	0	0	0
Otu179077	0	7.26104e-05	0	0	0	0	0	0	0	0	0	0	0	0	0	0	0	0	0	0	0	0	0	0	0	0	0	0	0	0	0	0	0	0	0	0	0	0	0	0	0	0	0	0	0	0	0	0	0
Otu179200	0	0	0	0	0	0	0	4.62246e-06	0	0	0	0	0	0	0	0	0	0.000111769	0	0	0	0	0	0	0	0	0	0	0	0	0	0	0	0	0	0	0	0	0	9.55904e-06	0	0	0	0	0	0	0	0	0
Otu1800	4.6318e-06	0	0	4.64074e-06	0	0	0	0	0	2.36558e-05	1.4659e-05	1.30053e-05	0	0.000254336	0	0	4.61072e-06	0	4.333e-06	0	0	0	0	0	9.46607e-06	0.000168245	8.95704e-06	0	0	0	0	0	0	4.7357e-06	1.52575e-05	0	0	0	0	0	1.49933e-05	2.28769e-05	0	0	8.96716e-06	0	0	0	0
Otu1812	0	0	0	9.28147e-06	0	0	0	0	6.52878e-05	0	0	0	1.84946e-05	0	0	0	0	0	0	0	0	0	0	0	0	0	1.34356e-05	0	0	0	0	0	0	0	0	0	0	0	0	0	0	0	0	0	0	0	0	0	0
Otu18130	0	0	9.53225e-06	0	0	4.98137e-06	0	1.38674e-05	9.32684e-06	0	0	0	0	0	0	0	0	0	0	0	0	0	0	0	0	0	0	0	0	0	0	0	0	0	6.10302e-05	1.36434e-05	5.05285e-06	1.48869e-05	0	0	0	0	0	0	0	0	9.59228e-06	0	0
Otu186830	0	0	4.76613e-06	0	5.27497e-05	4.98137e-06	0	0	4.66342e-06	9.4623e-06	0	0	0	0	4.42229e-06	0	0	0	0	0	0	0	4.93029e-06	0	0	0	0	0	0	0	0	0	0	0	0	4.54779e-05	5.05285e-06	0	0	0	0	0	0	0	0	0	0	0	0
Otu1899	0	0	0	0	0	0	0	0	4.66342e-06	0	0	8.67021e-06	0	0	4.42229e-06	0	0	0	0	0	0	0	0	0	0	0	0	0	0	0	0	0	0	0	0	0	0	0.000203455	0	0	0	0	0	0	0	0	0	0	0
Otu191331	0	0	0	9.28147e-06	0	8.46833e-05	0	0	0	4.25804e-05	0	0	0	0	4.42229e-06	0	0	0	0	0	0	0	0	0	0	4.67347e-06	0	0	0	0	0	0	0	4.7357e-06	0	0	0	0	0	0	0	0	0	0	0	0	0	0	0
Otu2005	0	9.68139e-06	0	0.000162426	0	0	1.19044e-05	0	9.32684e-06	0	0	0	0	0	0	0	0	0	0	0	0	0	0	0	0	0	0	0	0	0	0	0	0	0	0	0	0	0	0	0	0	0	0	0	0	0	0	0	0
Otu2035	1.38954e-05	4.84069e-06	9.53225e-06	4.64074e-06	4.79543e-06	4.98137e-06	0	2.31123e-05	2.79805e-05	0	0	4.3351e-06	0	0	0	0	0	6.09648e-05	0	0	0	0	0	0	0	0	0	0	0	0	0	0	4.74172e-06	1.42071e-05	0.000579787	4.09301e-05	4.04228e-05	1.48869e-05	0	0	0	0	0	0	0	0	0	0	0
Otu2036	0	1.93628e-05	0	0	4.79543e-06	4.98137e-06	0	5.54695e-05	4.66342e-06	0	0	0	0	4.6243e-06	0	0	0	0	0	0	0	0	0	0	0	0	0	0	0	0	0	0	0	0	0	1.36434e-05	1.01057e-05	0	0	0	0	4.57538e-06	0	0	0	0	0	0	0
Otu2042	4.6318e-06	1.45221e-05	4.76613e-06	4.64074e-06	0	1.49441e-05	0	2.77348e-05	2.79805e-05	0	0	0	0	0	4.42229e-06	0	0	5.0804e-06	0	0	0	0	0	0	0	0	0	0	0	0	0	0	0	0	5.08585e-06	1.81912e-05	2.02114e-05	2.48116e-05	0	4.77952e-06	0	0	0	0	4.48358e-06	0	4.79614e-06	4.66057e-06	0
Otu2058	1.38954e-05	4.84069e-06	9.53225e-06	1.85629e-05	9.59085e-06	1.49441e-05	0	1.84898e-05	3.26439e-05	0	0	1.30053e-05	0	9.2486e-06	8.84459e-06	0	0	0	0	0	0	0	0	0	0	0	0	0	0	0	0	0	0	1.42071e-05	1.01717e-05	0.000377467	1.51586e-05	1.48869e-05	0	9.55904e-06	0	0	4.84623e-06	0	0	0	0	4.66057e-05	0
Otu207322	4.6318e-06	0	0	0	0	0	0	0	0	0	0	0	0	0	0	0	0	0	0	0	0	0	0	0	0	0	0	0	0	0	0	0	0	0	0	0	0	0	0	0	0	0	0	0	0.000116573	0	0	0	0
Otu207531	0	4.84069e-06	0	0	0	0	0	0	0	0	0	0	0	0	0	0	0	0	0	0	0	0	0	0	0	0	0	0	0	0	0	0	0	0	0.000142404	0	0	0	0	0	0	0	0	0	0	0	0	0	0
Otu2076	4.6318e-06	1.45221e-05	4.76613e-06	4.64074e-06	4.79543e-06	4.98137e-06	0	1.38674e-05	6.52878e-05	0	0	4.3351e-06	4.62366e-06	0	0	0	0	5.0804e-06	0	0	0	0	0	0	0	0	0	0	0	0	0	0	0	9.4714e-06	3.05151e-05	5.45735e-05	1.01057e-05	9.92462e-06	0	2.38976e-05	0	9.15076e-06	0	0	0	5.02828e-06	0	0	0
Otu2082	9.26359e-06	0	0	4.64074e-06	0	0	0	0	0	0	0	0	0	0	4.42229e-06	0	0	0	0	0	0	0	0	0	0	0	0	0	0	0	0	0	0	0	0.000111889	0.0018464	0	0	0	0	0	0	0	0	0	0	0	0	0
Otu210925	0	0	0	0	0	0	0	0	0	0	0	0	0	0	0.000128247	0	0	0	0	0	0	0	0	0	0	0	0	0	0	0	0	0	0	0	0	0	0	0	0	0	0	0	0	0	0	0	0	0	0
Otu211141	9.26359e-06	0	0	0	0	0	0	7.39594e-05	4.66342e-06	0	0	0	0	0	0	0	0	0	0	0	0	0	0	0	0	0	0	0	0	0	0	0	0	0	0	0	0	0	0	0	0	0	0	0	0	0	0	0	0
Otu211190	0	0	0	0	0	0	0	0	0	0	0	0	0	0	0	0	0	0	0	0	0	0	0	0	0	0	0	0	0	0	0	0	0	0	0	0	5.05285e-06	9.92462e-06	9.12409e-05	0	0	0	0	0	0	0	0	0	0
Otu211323	0	0	0	0.000129941	0	0	0	0	0	0	0	0	0	0	0	0	0	0	0	0	0	0	0	0	0	0	0	0	0	0	0	0	0	0	0	0	1.01057e-05	0	0	0	0	0	0	0	0	0	0	0	0
Otu21226	0	5.80883e-05	0	0	0	0	0	0	9.32684e-06	0	0	0	0	0	0	0	0	0	0	0	0	0	0	0	0	0	0	0	0	0	0	0	0	0	0	0	0	0	0	0	0	0	0	0	0	0	0	0	0
Otu2170	4.6318e-06	2.90442e-05	0	0	0	0	0	0	0.000130576	2.83869e-05	0	0	0	4.6243e-06	0	0	0	0	8.666e-06	0	0	4.5788e-06	0	1.02203e-05	0	0	0	0	0	0	0	0	0	0	0	0	0	9.92462e-06	0	0	0	2.28769e-05	1.45387e-05	0	4.48358e-06	0	0	0	0
Otu218381	0	0	0	0	4.79543e-06	0	0	0.00030046	4.66342e-06	0	0	0	0	0	0	0	0	0	0	0	0	0	0	0	0	0	0	0	0	0	0	0	0	0	5.08585e-06	0	0	0	0	0	0	0	0	0	0	0	0	0	0
Otu2193	4.6318e-06	0	0	4.64074e-06	0	1.49441e-05	0	0	1.86537e-05	0	4.88632e-06	0	9.24731e-06	0	0	0	0	0	0	0	0	0	0	0	0	4.67347e-06	0	0	0	0	0	0	0	0	5.08585e-06	8.18602e-05	5.05285e-06	4.96231e-06	0	0	0	0	0	0	0	5.02828e-06	0	0	0
Otu222180	0	0	0	0	0	0	0	0	0	0	0	0	0	0	0	0	0	0	0	0	0	0	0	0	0	0	0	0	0	0	0	0	0	0	0	9.09558e-06	0	0.000168719	0	1.91181e-05	0	0	0	0	0	0	0	0	0
Otu222243	0	0	0	1.39222e-05	0	0	0	0	0	1.41935e-05	0	0	0	0	0	0	0	0	0	0	0	0	0	0	0	0	0	0	0	0	0	0	0	0	0	0	0	0	0	0	9.9955e-05	0	0	0	0	0	0	0	0
Otu222464	0	0	0	6.03296e-05	0	0	0	0	0	0	0	0	0	0	0	0	0	0	0	0	0	0	0	0	0	0	0	0	0	0	0	0	0	0	0	0	0	0	0	0	0	0	0	0	0	0	0	0	0
Otu222587	6.02133e-05	0	0	4.64074e-06	0	0	0	0	0	0	0	0	0	0	0	0	0	0	0	0	0	0	0	0	0	0	8.95704e-06	0	4.95742e-06	0	0	0	0	0	0	0	0	0	0	0	0	0	0	0	0	0	0	0	0
Otu2232	0	9.68139e-06	1.42984e-05	0	0	0	0	4.62246e-06	0.000135239	0	0	0	0	0	0	0	0	0	0	0	0	0	0	0	0	0	0	0	0	0	0	0	0	0	0	0	5.05285e-06	0	0	0	0	0	0	0	0	0	0	0	0
Otu232520	0	4.84069e-06	0	0	0	0	0	6.47144e-05	0	0	0	0	0	0	0	0	0	0	0	0	0	0	0	0	0	0	0	0	0	0	0	0	0	0	0	0	0	0	0	0	0	0	0	0	0	0	0	0	0
Otu233622	0	0	0	0	0	0	0	4.62246e-06	0	0	6.84085e-05	0	0	0	0	0	0	0	0	0	0	0	0	0	0	0	0	0	0	0	0	0	0	0	0	0	0	0	0	0	0	0	0	0	0	0	0	0	0
Otu234344	0	0	0	0	0	0	7.14264e-05	0	0	4.73115e-06	0	0	0	0	0	0	0	0	0	0	0	0	0	0	0	0	0	0	0	0	0	0	0	4.7357e-06	0	0	0	0	0	0	0	0	0	0	0	0	0	0	0
Otu2360	0	0	0	0	0	0	0	0	0	9.4623e-06	0	0	0	0	0	0	0	0	2.1665e-05	0	0	0	0	0	0	0	0	0	0	0	0	0	0	0	0	0	0	0	0	0	0	0	0	0	0	0	0	0	0
Otu242804	0	0	0	4.64074e-06	0	0	0	0	0	0	0	0	0	0	0	0	0	0	0	0	0	0	0	0	0	0	0	0	0	0	0	0	0	0	0	0	0	0	0	0	0	0	0	0	0	0	0	0	0
Otu242805	0	0	0	0	0	0	0	0	0	0	0	0	0	0	0	0	0	0	5.1996e-05	0	0	0	0	0	0	0	0	0	0	0	0	0	0	0	0	0	0	0	0	0	0	0	0	0	0	0	0	0	0
Otu242896	0	0	0	0	0	0	0	0	1.39903e-05	0	0	0	0	0	0	0	0	0	0	0	0	0	0	0	0	0	0	0	0	0	0	0	0	0	0	0	0	0	0	0	0	8.23569e-05	0	0	0	0	0	0	0
Otu243003	0	0	0	0	0	0	0	0	0	0	0	0	0	0	0	0	0	0	0	0	0	0	0	0	0	0	0	0	0	0	0	0	0	0	0	0	0	0	0	0	0	0	8.23859e-05	0	0	0	0	0	0
Otu24345	9.26359e-06	3.38848e-05	1.42984e-05	0	4.79543e-06	1.99255e-05	0	9.24492e-06	1.39903e-05	4.73115e-06	0	1.30053e-05	0	0	0	0	0	0	0	1.33504e-05	0	0	0	5.11015e-06	4.73303e-06	0	0	0	0	0	0	0	0	0	0	0	6.06342e-05	2.48116e-05	5.06894e-06	4.77952e-06	0	0	4.84623e-06	0	0	0	0	0	0
Otu243577	9.26359e-06	0	9.53225e-06	0	0	0	0	0	0	0	0	0	0	0	0	0	0	0	0	0	0	0	0	0	0	0	0	0	0	0	0	0	0	0	0	0	0	0	0	0.000181622	0	0	0	0	0	0	0	0	0
Otu24637	0	0	0	0	0	0	0	0	0	4.73115e-06	0	4.3351e-06	0	9.2486e-06	0	0	0	0	0	4.45012e-06	0	0	0	0	0	0	6.26993e-05	0	0	0	0	0	0	9.4714e-06	0	0	0	0	0	0.000329787	0	0	0	0	0	0	4.79614e-06	0	0
Otu24835	0	0	0	0	0	0	0	0	0	2.83869e-05	0	1.30053e-05	0	4.6243e-06	0	0	0	0	0	0	0	4.5788e-06	0	0	0	0	0	0	0	0	0	0	0	0	0	0	0	0	0	0	1.9991e-05	0	0	0	0	5.02828e-06	0	0	0
Otu24855	9.26359e-06	9.68139e-06	4.76613e-06	2.32037e-05	0	4.98137e-06	0	0	7.92781e-05	4.73115e-05	4.88632e-06	1.73404e-05	0	4.6243e-06	4.42229e-06	4.45458e-06	0	0	3.8997e-05	6.23017e-05	2.02038e-05	9.15759e-06	9.86057e-06	0	9.46607e-06	0.000453326	4.47852e-06	0	0	0	0	0	0	9.4714e-06	0	0	0	0	0	0	4.99775e-06	0	5.81547e-05	0	8.96716e-06	1.50849e-05	9.59228e-06	4.66057e-06	0
Otu2491	0	0	4.76613e-06	0	0	0	0	0	0	0	0	0	0	0	0	0	0	0	0	0	0	0	0	0	0	0	0	0	0	0	0	0	0	0	0.00012206	0	0	0	0	0	0	0	0	0	0	0	0	0	0
Otu24925	0	0	0	0	0	4.98137e-06	0	0	4.66342e-06	0	0	0	0	0	0	0	0	0	0	0	0	0	0	7.66522e-05	0	0	0	0	0	0	0	0	0	0	5.08585e-06	9.09558e-05	0	9.92462e-06	0	0	0	0	0	0	0	5.02828e-06	0	0	0
Otu253260	0	0	0	4.64074e-06	0	0	0	0	0	0	0	0.000108378	0	0	0	0	0	0	0	0	0	0	0	0	0	0	0	0	0	0	0	0	0	0	0	0	0	0	0	0	0	0	0	0	0	0	0	0	0
Otu25334	0	0	0	0	0	0	0	0	0	0	0	0	0	0	0	0	0	0	0	0	0	4.5788e-06	0	0	0	0	0	0	0	0	0	0	0	0	0	0	0	8.43593e-05	0	0	0	0	0	0	0	0	0	0	0
Otu25354	0	2.42035e-05	4.76613e-06	1.85629e-05	9.59085e-06	3.9851e-05	0	1.84898e-05	2.33171e-05	0	4.88632e-06	1.30053e-05	4.62366e-06	0	0	0	0	4.06432e-05	4.333e-06	0	0	0	0	0	0	0	0	0	0	0	7.94467e-05	0	0	0	3.56009e-05	4.54779e-06	0	5.45854e-05	0	4.77952e-06	0	4.57538e-06	0	0	0	0	1.43884e-05	0	0
Otu254326	0	5.32476e-05	3.33629e-05	4.64074e-06	4.79543e-06	1.49441e-05	0	4.62246e-06	0	0	0	0	0	0	0	0	0	2.03216e-05	0	0	0	0	0	0	0	0	0	0	0	0	0	0	0	2.36785e-05	5.08585e-06	9.09558e-06	0	9.92462e-06	0	1.43386e-05	0	0	0	0	0	0	0	0	4.74989e-06
Otu25462	4.6318e-06	4.84069e-06	4.76613e-06	2.32037e-05	0	4.98137e-06	0	0	2.79805e-05	0	0	0	9.24731e-06	4.6243e-06	0	0	0	6.09648e-05	0	4.45012e-06	0	0	0	2.55507e-05	0	0	0	0	0	0	0	0	0	0	5.08585e-05	3.18345e-05	0	5.95477e-05	0	0	0	0	0	0	0	0	0	0	0
Otu255932	0	8.22918e-05	0	2.78444e-05	0	0	5.9522e-06	0	0	0	0	0	4.62366e-06	0	8.84459e-06	0	0	0	0	0	0	0	0	0	0	0	0	0	0	0	0	0	0	0	5.08585e-06	0	0	4.96231e-06	0	0	0	0	0	0	0	0	0	0	0
Otu256501	0	4.84069e-06	0	0	0	0	0	0	0	0	0	0	0	0	0	0	0	0	0	0	0	0	0	0	0	0	6.26993e-05	0	0	0	0	0	0	0	0	0	5.05285e-06	0	0	0	0	0	0	0	0	0	0	0	0
Otu256514	0	0	0	0	0	0	0	0	4.66342e-06	0	0	0	0	0	0	0	0	0	0	0	0	0	0	0	0	0	0	0	0	0	0	0	0	0	0	0	0	0	0	0	0	0	0	0	0	0	0	0	0
Otu26193	0	0	0	4.64074e-06	0	0	0	0	4.66342e-06	0	0	0	0	0	0	0	0	0.00013209	0	0	0	0	0	0	0	0	0	0	0	0	0	0	0	0	0	4.54779e-06	0	0	0	0	0	0	0	0	0	0	0	0	0
Otu26454	9.26359e-06	4.84069e-06	0	3.71259e-05	1.91817e-05	3.48696e-05	0	2.77348e-05	1.39903e-05	0	0	0	0	0	8.84459e-06	0	0	5.0804e-06	0	0	0	0	0	0	0	0	0	0	0	0	9.93083e-06	0	0	4.7357e-06	5.08585e-06	0.000304702	1.01057e-05	7.9397e-05	5.06894e-06	0	0	0	0	0	0	0	0	1.39817e-05	0
Otu264611	4.6318e-06	0	9.53225e-06	0	0	0	0	9.24492e-06	0	0	0	0	0.00010172	0	0	0	0	0	0	0	0	0	0	0	0	0	0	0	0	0	0	0	0	0	0	0	0	0	0	1.43386e-05	0	0	0	0	0	0	0	0	0
Otu26503	0	1.45221e-05	9.53225e-06	0	0	0.000224162	0	4.62246e-06	0	0	0	0	0	0	0	0	0	5.0804e-06	0	0	0	0	0	0	0	0	0	0	0	0	0	0	0	4.7357e-06	1.01717e-05	9.09558e-06	1.01057e-05	4.96231e-06	0	4.77952e-06	0	0	0	0	0	0	0	0	0
Otu267427	1.85272e-05	4.84069e-06	2.85968e-05	0	4.79543e-06	0	0	9.24492e-06	9.32684e-06	9.4623e-06	0	0	0	4.6243e-06	0	0	0	9.65275e-05	0	0	0	0	0	3.06609e-05	0	0	0	0	0	0	0	0	0	9.4714e-06	1.52575e-05	9.09558e-06	5.05285e-06	0	0	1.91181e-05	0	0	4.84623e-06	0	0	0	0	0	0
Otu268222	0	0	0	4.64074e-06	0	0	0	0	0	4.73115e-06	0	0	0	0	0	0	0	0	0	0	0	0	0	0	0	0	0	0	0	0	0	0	0	0	0	0	0	0	0	0	9.9955e-06	0	0	0	0	0	0	0	0
Otu27185	9.26359e-06	0	0	0	0	0	0	0	0	0	0	0	0	0	0	0	0	0	0	0	0	0	0	0	0	0	0	0	0	0	0	0	0	0	0	0	0	0	0	0	0	0	0	0	0	0	0	0	0
Otu27418	0	0	0	0	0	0	0	0	0	0	0	0	0	0	0	0	0	0	0	0	0	0	0	0	0	0	0	0	0	0	0	0	0	4.7357e-06	0.000178005	0	0	0	0	0	0	0	0	0	0	0	0	0	0
Otu274345	0	0	0	0	0	0	0	0	0	0	0	0	0	0	0	0	0	9.65275e-05	0	0	0	0	0	0	0	0	0	0	0	0	0	0	0	0	0	4.54779e-06	0	0	0	0	0	0	0	0	0	0	0	0	0
Otu2752	0	0	0	0.000338774	0	2.49068e-05	0	9.24492e-06	4.66342e-06	0	0	0	0	0	0	0	0	4.06432e-05	0	0	0	0	0	0	0	0	0	0	0	0	0	0	0	1.42071e-05	7.62877e-05	0	0	1.48869e-05	0	0	0	0	0	0	0	0	4.79614e-06	0	0
Otu2753	0	0	4.76613e-06	0	0	0	0	0	0	0	0	0	0	0	0	0	0	0	0	0	0	0	0	0	0	0	0	0	0	0	0	0	0	0	0	0.000400206	0	0	0	0	0	0	0	0	0	0	0	0	0
Otu279004	0	0	0	0	0	0	0	0	0	1.41935e-05	0	4.3351e-06	0	0	0	0	0	1.52412e-05	0	0	0	0	0	0	0	0	0	0	0	0	0	0	0	0	0.000111889	0	0	4.96231e-06	0	0	0	0	0	0	0	0	0	0	0
Otu28377	4.6318e-06	0	9.53225e-06	0	0	0	0	2.31123e-05	9.32684e-06	0	4.88632e-06	0	0	0	0	0	0	5.0804e-06	0	0	0	0	0	5.11015e-06	0	0	0	0	0	0	0	0	0	0	1.52575e-05	0.000109147	0	2.48116e-05	0	0	0	4.57538e-06	0	0	0	0	0	0	0
Otu28492	4.6318e-06	0	0	0	0	0	0	0	0	0	0	0	0	6.93645e-05	0	0	0	0	0	0	0	0	0	0	0	0	0	0	0	0	0	0	0	0	0	0	0	0	0	0	0	0	0	0	0	0	0	0	0
Otu28584	0	0	0	0	0	0	0	0	7.46147e-05	0	0	0	0	0	0	0	0	0	0	0	0	0	0	0	0	0	0	0	0	0	0	0	0	0	5.08585e-06	0	0	9.92462e-06	0	0	0	0	0	0	0	0	0	0	0
Otu288104	4.6318e-06	0	0	0	0	0	0	0	0	0	0	0	0	0	0	0	0	0	0	0	0	0	0	0	0	0	0	0	0	0	0	0	0	0	0	0	0.000277907	0	0	0	0	0	0	0	0	0	0	0	0
Otu288145	0	0	0	0	0	0	0	0	0	0	0	0	0	0	5.74898e-05	0	0	0	0	0	0	0	0	0	0	0	0	0	0	0	0	0	0	0	0	0	0	0	0	4.77952e-06	0	0	0	0	0	0	0	0	0
Otu292223	0	0	0	0	0	0	0	0.000124806	0	0	0	0	0	0	0	0	0	0	0	0	0	0	0	0	0	0	0	0	0	0	0	0	0	0	0	0	5.05285e-06	0	0	0	1.9991e-05	0	0	0	0	0	0	0	0
Otu29449	0	0	0	0	0	0	0	6.93369e-05	0	0	0	0	0	0	4.42229e-06	0	0	0	0	0	0	0	0	0	0	0	0	0	0	0	0	0	0	0	0	4.54779e-06	0	4.96231e-06	0	0	0	0	0	0	0	0	0	0	0
Otu3	0.29341	0.623418	0.639242	0.121258	0.383035	0.334265	0.109074	0.475596	0.336298	0.203927	0.0925664	0.150333	0.0606023	0.173296	0.167185	0.0195289	0.0385502	0.132959	0.0307296	0.0350892	0.0151882	0.0091347	0.0500276	0.114329	0.134219	0.0342285	0.0387437	0.00136212	0.0160273	0.00282606	0.135913	0.0627008	0.0487496	0.27324	0.352195	0.350271	0.606464	0.114188	0.0910939	0.361121	0.0886451	0.257475	0.0562793	0.00181237	0.0667516	0.0512634	0.0618174	0.180863	0.0268464
Otu30007	0	4.84069e-06	0	0	4.79543e-06	4.98137e-06	0	0	0	0	0	0	0	0	0	0	0	0	0	0	0	0	0	0	0	0	0	0	0	0	0	0	0	0	0	0	0	0.000148869	0	0	0	0	0	0	0	0	0	0	0
Otu30027	0	0	0	0	4.79543e-06	0	0	0	0	0	0	0	0	0	0	0	0	0	0	0	0	0	0	0	0	0	0	0	0	0	0.000129101	0	0	0	0	0	0	0	0	0	0	0	0	0	0	0	0	0	0
Otu30259	0	0	0	0	0	0	0	0	0	0	0	0	0	0	0	0	0	0	0	0	0	0	0	0	0	0	0	0	0	0	0	0	0	0	6.6116e-05	0	0	0	0	4.77952e-06	0	0	0	0	0	0	0	0	0
Otu3052	0	0	4.76613e-06	0	0	0	0	0	0	0	0	0	0	0	0	0	0	0	0	0	0	0	0	0	0	0	0	0	0	0	0	0	0	0	0	0	0	0.000297739	0	0	0	0	0	0	0	0	0	0	0
Otu30596	4.6318e-06	0	4.76613e-06	0	0	1.49441e-05	6.54742e-05	9.24492e-06	4.66342e-06	0	0	0	0	0	0	0	0	0	0	0	0	0	0	5.11015e-06	0	0	0	0	0	0	0	0	0	4.7357e-06	1.01717e-05	0	0	9.92462e-06	0	0	0	0	0	0	0	0	0	0	0
Otu306217	0	0	0	0	0	0	0	0	0	0	0	4.3351e-06	0	0	0	0	0	0	0	8.01022e-05	0	0	0	0	0	0	0	0	0	0	0	0	0	0	0	0	0	0	0	0	0	0	0	0	0	0	0	0	0
Otu30691	0	0	4.76613e-06	0	0	0	0	0	0	0	0	0	0	0	0	0	0	0	0	0	0	0	0	0	0	0	0	0	0	0	0	0	0	0	0	0	0	0	0	0	0	0	0	0	0	0	0	0	0
Otu30773	4.6318e-06	0	0	0	0	0	2.9761e-05	0	0	0	0	0	0	4.6243e-06	0	0	0	0.000198135	0	0	0	0	0	0	0	0	0	0	0	0	0	0	0	0	1.52575e-05	4.54779e-06	0	9.92462e-06	0	0	0	0	0	0	0	0	0	0	0
Otu3094	0	0	0	0	0	0	0	0	0	4.73115e-06	9.77264e-06	0	4.62366e-06	0	0	0	0	0	0	2.22506e-05	0	0	0	0	0	0	0	0	0	0	0	0	0	0	0	0	0	0	0	0	0	0	0	0	0	0	0	0	0
Otu31328	0	0	0	4.64074e-06	0	8.96647e-05	0	0	0	0	0	0	0	0	0	0	0	0	0	0	0	0	0	0	0	0	0	0	0	0	0	0	0	0	1.52575e-05	0	5.05285e-06	0	0	0	0	0	0	0	0	0	0	0	0
Otu31393	1.85272e-05	1.45221e-05	4.76613e-06	0	9.59085e-06	4.98137e-06	0	9.24492e-06	2.33171e-05	0	0	4.3351e-06	0	4.6243e-06	8.84459e-06	0	4.61072e-06	2.03216e-05	0	0	0	0	0	5.11015e-06	0	0	0	0	0	0	4.96542e-06	0	0	4.7357e-06	2.03434e-05	2.2739e-05	1.01057e-05	0.000218342	5.06894e-06	4.77952e-06	0	0	9.69246e-06	0	0	0	0	0	0
Otu3147	0	0	0	0	4.79543e-06	0	4.16654e-05	0	0	0	0	0	0	0	0	0	0	0	0	4.45012e-06	0	0	0	0	0	0	0	0	0	0	0	0	0	0	2.54292e-05	0	5.05285e-06	5.95477e-05	0	0	0	0	0	0	0	0	0	0	0
Otu31602	4.6318e-06	0	0	0	0	0	0	0	0.00129177	4.73115e-06	0	4.3351e-06	0	0	0	0	0	0	0	0	0	0	0	0	0	0	0	0	0	0	0	0	0	0	1.01717e-05	0	0	0	0	0	0	0	0	0	0	0	0	0	0
Otu318654	0.000194535	0	0	0	9.59085e-06	0	0	0	0	0	0	0	0	0	0	0	0	0	0	0	0	0	0	0	0	0	0	0	0	0	0	0	0	0	0	0	0	0	0	0	0	0	0	0	0	0	0	0	0
Otu31993	4.6318e-06	9.68139e-06	1.42984e-05	0	0	9.96274e-06	0	1.84898e-05	2.33171e-05	0	0	0	0	0	0	0	0	0	0	0	0	0	0	0	0	0	0	0	0	0	4.96542e-06	0	0	0	0.000106803	1.36434e-05	0	9.92462e-06	0	0	0	0	0	0	0	0	0	0	0
Otu32469	4.6318e-06	0	4.76613e-06	9.28147e-06	0	4.98137e-06	0	9.24492e-06	6.06244e-05	0	0	0	4.62366e-06	4.6243e-06	0	0	0	1.52412e-05	0	4.45012e-06	0	0	0	0	0	0	0	0	0	0	0	0	0	4.7357e-06	1.52575e-05	1.81912e-05	0	2.97739e-05	0	4.77952e-06	0	0	0	0	0	0	0	0	0
Otu32659	9.26359e-06	0	0	0	0	0	0	0	0	4.73115e-06	0	0	0	0	7.96013e-05	0	0	0	0	0	0	0	0	0	0	0	0	4.95317e-06	0	0	0	0	0	0	0	0	0	0	0	0	0	0	0	0	4.48358e-06	0	0	0	0
Otu329838	0	0	0	0	0.000273339	0	0	0	0	0	0	0	0	0	0	0	0	0	0	0	0	0	0	0	0	0	0	0	0	0	0	0	0	0	0	0	5.05285e-06	0	0	0	0	0	0	0	0	0	0	0	0
Otu331088	4.6318e-06	0	0	0	0	0	0	0	0	0	0	0	0	0	0	0	0	0	0	0	0	0	0	0	0	0	0	0	0	0	0	0	0	0	0	0.000131886	0	0	0	0	0	0	0	0	0	0	0	0	0
Otu335408	0	0	0	0	0	0	0	0	0	0	0	0	0	0	0	0	0	0	0	0	0	0	0	0	0	0	0	0	0	0	0	0	0	0	5.08585e-06	0	0	0	0	0	0	0	0	0	0	0	0	0	0
Otu337818	0	0	0	0	0	0	0	1.38674e-05	4.66342e-06	0.000241289	0	0	0	0	0	0	0	0	0	0	0	0	0	0	0	0	0	0	0	0	0	0	0	0	0	0	0	0	0	0	0	0	0	0	0	0	0	0	0
Otu34049	0	4.84069e-06	0	0	0	0	0	0	0	0	0	0	0	0	0	0	0	0	0	0	0	0	0	0	0	0	0	0	0	0	7.94467e-05	0	0	0	0	4.54779e-06	0	4.96231e-06	0	0	0	0	0	0	0	0	0	0	0
Otu342796	0	4.84069e-06	0	0	9.59085e-05	0	0	0	0	0	0	0	0	0	4.42229e-06	0	0	0	0	0	0	0	0	0	0	0	0	0	0	0	0	0	0	0	0	0	0	0	0	0	0	0	0	0	0	0	0	0	0
Otu34518	0	5.80883e-05	4.76613e-06	0	0	0	0	9.24492e-06	1.86537e-05	0	0	0	0	0	4.42229e-06	0	0	0	0	0	0	0	0	0	0	0	0	0	0	0	0	0	0	0	0	1.36434e-05	1.01057e-05	0	0	0	0	0	0	0	0	0	0	0	0
Otu349823	0	9.68139e-06	0	0	0	0	0	0	0	0	0	0	0	0	0	0	0	0	0	0	0	0	0	0	0	0	0	0	0	0	0	0	0	0.000184692	0	0	0	0	0	0	0	0	0	0	0	0	0	0	0
Otu35114	0	0	0	0	0	9.96274e-06	0	0	0	0	0	0	0	0	0	0	0	0.000391191	0	0	0	0	0	5.11015e-06	0	0	0	0	0	0	0	0	0	0	9.66311e-05	4.54779e-06	0	0	0	0	0	0	0	0	0	0	0	0	0
Otu354269	0	0	0.00044325	0	0	0	0	0	0	0	0	4.3351e-06	0	0	0	0	0	0	0	0	0	0	0	0	0	0	0	0	0	0	0	0	0	0	0	0	0	0	0	0	0	0	0	0	0	0	0	0	0
Otu35503	0	0	1.42984e-05	4.64074e-06	0	1.49441e-05	0	4.62246e-06	0.000149229	0	0	4.3351e-06	0	0	0	0	4.61072e-06	0	0	0	0	0	0	0	0	0	0	0	0	0	0	0	0	4.7357e-06	5.08585e-06	6.36691e-05	5.05285e-06	6.94724e-05	0	0	0	0	0	0	0	0	0	0	0
Otu35873	0	4.84069e-06	0	0	0	4.98137e-06	0	0	0.000139903	0	0	0	0	0	0	0	0	0	0	0	0	0	0	0	0	0	0	0	0	0	0	0	0	0	0	0	0	4.96231e-06	0	0	0	0	0	0	0	0	0	0	0
Otu358980	5.09497e-05	0	0	0	0	0	0	0	0	0	0	0	0	0	0	0	0	0	0	0	0	4.5788e-06	0	0	0	0	0	0	4.95742e-06	0	0	0	0	0	0	0	0	0	0	0	0	0	0	0	0	0	0	0	0
Otu36093	0	0	0	0	0	0	0	0	7.92781e-05	0	0	0	0	0	0	0	0	1.01608e-05	0	0	0	0	0	0	0	0	0	0	0	0	0	0	0	0	2.54292e-05	1.36434e-05	0	0	0	0	0	0	0	0	0	0	0	0	0
Otu362100	0	0	0	0.000241318	0	0	0	0	4.66342e-06	0	0	0	0	0	0	0	0	0	0	0	0	0	0	0	0	0	0	0	0	0	0	0	0	0	0	0	0	0	0	0	0	0	0	0	0	0	0	0	0
Otu36274	6.48451e-05	9.68139e-06	4.76613e-06	0.000185629	4.79543e-06	1.99255e-05	0	0	0	0.000761716	2.93179e-05	2.16755e-05	4.62366e-06	4.16187e-05	2.65338e-05	0	2.76643e-05	1.01608e-05	1.7332e-05	2.22506e-05	0	3.66304e-05	0	5.11015e-06	2.36652e-05	0.000271061	4.47852e-06	0	4.95742e-06	0	0	0	0	9.4714e-06	2.03434e-05	0	1.01057e-05	1.98492e-05	1.52068e-05	4.77952e-06	1.49933e-05	4.57538e-06	2.42311e-05	0	2.24179e-05	1.50849e-05	9.59228e-06	4.66057e-06	2.37495e-05
Otu36289	0	0	0	0	0	0	0	0	4.66342e-06	4.73115e-06	0	4.3351e-06	0	0	0	0	4.61072e-06	0	4.333e-06	0	0.000111121	0	4.93029e-06	3.5771e-05	0	4.67347e-06	0	0	0	4.8144e-06	0	0	0	2.84142e-05	6.6116e-05	0	5.05285e-06	4.96231e-06	0	1.43386e-05	9.9955e-06	0	4.84623e-06	0	0	0	4.79614e-06	0	2.84994e-05
Otu36291	0.000250117	0.000198468	0.000109621	3.71259e-05	2.39771e-05	5.97764e-05	0	6.0092e-05	5.5961e-05	5.20427e-05	4.88632e-06	1.73404e-05	0	0	4.42229e-06	0	0	3.04824e-05	0	0	6.56622e-05	0	4.93029e-06	0	0	0	0	0	0	0	9.93083e-06	4.78085e-06	0	3.78856e-05	8.13736e-05	5.91213e-05	6.06342e-05	3.96985e-05	0	5.73542e-05	3.49843e-05	9.15076e-06	0	0	0	0	4.79614e-06	0	3.79992e-05
Otu36294	1.38954e-05	4.84069e-06	0	0	0	4.98137e-06	0	0	0	7.56984e-05	4.39769e-05	6.50266e-05	0	4.16187e-05	2.65338e-05	8.90916e-06	0	1.01608e-05	3.4664e-05	8.90024e-06	0	3.20516e-05	0	0	5.67964e-05	9.34693e-06	8.95704e-06	4.95317e-06	9.91483e-06	0	0	0	0	0	8.13736e-05	0	0	0	0	9.55904e-06	0	3.20277e-05	4.84623e-06	0	4.48358e-06	1.50849e-05	9.59228e-06	0	4.74989e-06
Otu36302	1.38954e-05	9.68139e-06	9.53225e-06	1.39222e-05	9.59085e-06	0.000119553	4.16654e-05	9.70717e-05	0.000116585	9.4623e-06	0	0	9.24731e-06	1.84972e-05	4.42229e-06	8.90916e-06	0	0.000172734	0.000125657	0	0	0	0	3.06609e-05	4.73303e-06	0	4.47852e-06	0	0	0	0	0	0	9.4714e-06	0.000462812	5.00257e-05	5.05285e-06	0.000263002	0	0	9.9955e-06	4.57538e-06	0	0	1.34507e-05	4.02263e-05	9.59228e-06	6.5248e-05	0
Otu36304	0	0	0	0	0	0	0	0	0	0	0	0	0	0	0	0	0	0	0	0	0	0	0	3.06609e-05	0	0	0	0	0	0	0	0	0	0	0	0	0	0	0	0	0	0	0	0	0	0	0	0	0
Otu36309	1.38954e-05	0	1.42984e-05	1.39222e-05	0	3.9851e-05	0	3.23572e-05	9.79318e-05	0	0	0	9.24731e-06	0	4.42229e-06	0	0	4.57236e-05	0	4.45012e-06	0	0	0	0	0	0	0	0	0	0	1.48962e-05	0	0	9.4714e-06	0.000213606	0.00016372	1.51586e-05	2.97739e-05	5.06894e-06	4.77952e-06	4.99775e-06	4.57538e-06	0	0	0	0	0	0	0
Otu36310	0	1.45221e-05	0	1.39222e-05	4.79543e-06	2.49068e-05	0	0	0	2.36558e-05	4.88632e-06	0	1.84946e-05	0	0	0	0	0	6.4995e-05	3.11508e-05	0	1.37364e-05	0	5.11015e-06	9.46607e-06	0	4.47852e-06	0	0	0	0	0	0	0	5.08585e-06	0	0	9.92462e-06	0	0	0	3.20277e-05	0.000174464	0	0	5.02828e-06	0	3.72846e-05	4.74989e-06
Otu36324	9.26359e-06	1.93628e-05	4.76613e-06	3.24852e-05	9.59085e-06	9.96274e-06	0	4.62246e-06	6.52878e-05	0	0	8.67021e-06	0	0	0	0	0	3.55628e-05	0	8.90024e-06	0	0	0	0	4.73303e-06	0	0	0	0	0	5.9585e-05	0	0	4.7357e-06	5.59443e-05	5.00257e-05	5.05285e-06	2.48116e-05	5.06894e-06	1.91181e-05	0	1.37261e-05	4.84623e-06	0	8.96716e-06	0	0	0	0
Otu36387	0	0	0	9.28147e-06	0	9.96274e-06	0	0	6.06244e-05	0	0	0	0	0	0	0	0	0	0	0	0	0	0	0	9.46607e-06	0	0	0	0	0	2.97925e-05	0	0	0	1.01717e-05	4.54779e-06	0	2.48116e-05	0	0	0	0	0	0	0	5.02828e-06	0	1.86423e-05	0
Otu36403	0	1.93628e-05	0	0	0	0	0	0	4.66342e-06	0	0	4.3351e-06	0	0	0	0	0	0	0.000385637	0	0	0	0	0	0	9.34693e-06	0	0	0	0	0	0	0	0	2.03434e-05	4.54779e-06	0	4.96231e-06	0	0	0	9.15076e-06	0	0	0	5.02828e-06	0	1.39817e-05	0
Otu36411	0	9.68139e-06	0	4.64074e-06	0	4.98137e-06	0	0	2.79805e-05	5.67738e-05	0	1.30053e-05	0	0	0	0	4.61072e-06	5.0804e-06	4.333e-06	0	0	4.5788e-06	0	5.11015e-06	0	0	0	0	0	0	0	0	0	9.4714e-06	5.08585e-06	0	0	0	0	0	0	4.57538e-06	4.84623e-06	0	4.48358e-06	0	0	0	0
Otu36447	9.26359e-06	2.42035e-05	1.42984e-05	9.28147e-06	1.91817e-05	9.96274e-06	1.19044e-05	0	0	2.83869e-05	9.77264e-06	2.60106e-05	0	6.47402e-05	0	0	1.38322e-05	0	2.5998e-05	8.01022e-05	1.51528e-05	9.15759e-06	3.94423e-05	5.11015e-06	4.73303e-06	8.87958e-05	1.79141e-05	0	0	0	0	0	0	4.7357e-06	5.59443e-05	0	1.01057e-05	4.96231e-06	5.06894e-06	7.64723e-05	0	0	5.33085e-05	4.74442e-06	1.34507e-05	4.52546e-05	0	3.2624e-05	0
Otu36468	0	0	0	1.85629e-05	0	9.96274e-06	0	0	4.66342e-06	6.1505e-05	9.77264e-06	4.3351e-06	4.16129e-05	0.00485551	0	0	4.61072e-06	0	4.333e-06	0	0	9.15759e-06	0	5.11015e-06	4.73303e-06	4.67347e-06	0	0	4.95742e-06	0	0	0	0	0	5.08585e-06	0	0	0	0	0	4.99775e-06	1.83015e-05	1.45387e-05	0	1.34507e-05	1.00566e-05	0	0	0
Otu36731	4.6318e-06	1.93628e-05	4.76613e-06	2.78444e-05	0	9.96274e-06	0	4.62246e-06	9.32684e-06	0	0	0	0	2.31215e-05	8.84459e-05	0	0	0	0	0	0	0	0	1.02203e-05	0	0	0	0	0	0	0	0	0	0	5.08585e-06	1.36434e-05	5.05285e-06	4.96231e-06	0	0	0	0	0	0	0	0	0	0	0
Otu36787	9.26359e-06	0	4.76613e-06	4.17666e-05	0	1.99255e-05	0	0	0	3.78492e-05	0	2.16755e-05	0	1.84972e-05	0	4.45458e-06	4.61072e-06	0	0	0	0	1.83152e-05	0	0	0	9.34693e-05	0	0	0	0	0	0	0	0	5.08585e-06	0	0	4.96231e-06	0	0	0	0	0	0	4.48358e-06	0	0	0	0
Otu36988	0	0	9.53225e-06	4.64074e-06	7.67268e-05	4.98137e-06	0	9.24492e-06	4.66342e-06	0	0	0	0	0	0	0	0	1.52412e-05	0	0	5.05094e-06	0	0	1.02203e-05	0	0	0	0	0	0	4.96542e-06	0	0	0	5.08585e-06	4.54779e-06	0	0	0	0	0	2.28769e-05	0	0	0	0	4.79614e-06	0	0
Otu37030	1.38954e-05	0	0	3.24852e-05	1.43863e-05	0	5.9522e-06	0	4.66342e-06	3.78492e-05	9.77264e-06	2.16755e-05	0	2.31215e-05	0	0	0	0	8.666e-06	4.00511e-05	0	4.5788e-06	4.93029e-06	5.11015e-06	4.73303e-06	1.86939e-05	0	0	4.95742e-06	0	0	0	0	0	0	0	0	0	0	0	1.49933e-05	0	4.84623e-05	0	0	0	9.59228e-06	0	0
Otu37248	0	0	0	0	9.59085e-05	9.96274e-06	0	0	0	0	0	0	0	0	0	0	9.22143e-06	0	0	0	0	0	0	0	0	0	0	0	0	0	0	0	0	0	1.01717e-05	0	0	4.96231e-06	0	0	0	0	0	0	0	0	0	0	0
Otu37483	0	4.84069e-06	4.76613e-06	0	0	5.97764e-05	1.19044e-05	2.77348e-05	0	0	0	0	0	0	0	0	0	0	0	0	0	0	0	0	0	0	0	0	0	0	0	0	0	0	0	0	0	4.96231e-06	0	0	0	0	0	0	0	0	0	0	0
Otu37512	1.85272e-05	9.68139e-06	0	7.42518e-05	4.79543e-06	4.98137e-06	5.9522e-06	2.31123e-05	9.32684e-06	0	0	0	4.62366e-06	0	0	4.45458e-06	0	0	0	0	0	0	0	5.11015e-06	4.73303e-06	0	0	0	0	0	4.96542e-06	0	0	0	2.54292e-05	3.63823e-05	5.05285e-06	1.98492e-05	0	4.77952e-06	4.99775e-06	9.15076e-06	4.84623e-06	0	0	0	0	0	0
Otu37711	4.6318e-06	0	4.76613e-06	0	0	0	0	0	9.32684e-06	0	0	0	4.62366e-06	4.6243e-06	0	0	0	0	0	0	0	0	0	2.04406e-05	0	0	0	0	9.91483e-06	0	4.96542e-06	0	0	4.7357e-06	1.01717e-05	5.45735e-05	1.51586e-05	0	0	0	4.99775e-06	0	0	0	0	1.50849e-05	0	0	0
Otu37798	9.26359e-06	8.22918e-05	1.42984e-05	0	0.000105499	9.96274e-06	0	1.38674e-05	1.86537e-05	9.4623e-06	0	8.67021e-06	0	0	3.53783e-05	0	4.61072e-06	0	0	0	0	0	0	0	0	0	0	0	0	0	0.00018372	0	0	9.4714e-06	2.03434e-05	2.2739e-05	2.52643e-05	1.48869e-05	0	2.38976e-05	0	1.83015e-05	0	0	0	0	0	0	4.74989e-06
Otu37806	9.26359e-06	0	4.76613e-06	7.42518e-05	0	3.9851e-05	0	4.62246e-06	5.5961e-05	0	0	0	4.62366e-06	4.6243e-06	0	0	0	5.0804e-06	0	0	0	0	0	0	0	0	0	0	0	0	4.96542e-06	0	0	0	3.05151e-05	0	0	3.47362e-05	0	0	0	9.15076e-06	0	0	0	0	0	0	0
Otu37850	0	1.45221e-05	5.71935e-05	0	0	4.98137e-06	0	0	9.32684e-06	0	0	0	0	0	0	0	0	0	0	0	0	0	0	0	0	0	0	0	0	0	0	0	0	0	0	1.81912e-05	0	4.96231e-06	0	0	0	9.15076e-06	0	0	0	0	0	0	0
Otu38261	2.77908e-05	4.35662e-05	1.42984e-05	5.10481e-05	4.79543e-06	9.96274e-06	0	3.69797e-05	0.000158556	0	0	4.3351e-06	4.62366e-06	9.2486e-06	4.42229e-06	0	0	2.5402e-05	0	0	0	0	0	0	0	0	0	0	1.98297e-05	0	0	0	0	4.7357e-06	4.57726e-05	4.54779e-05	2.02114e-05	2.48116e-05	0	9.55904e-06	0	9.15076e-06	4.84623e-06	6.64219e-05	0	0	9.59228e-06	0	0
Otu383717	0	0	0	0	6.23406e-05	0	0	0	0	0	0	0	0	0	0	0	0	0	0	0	0	0	0	0	0	0	0	0	0	0	0	0	0	0	0	0	0	0	0	0	0	0	0	0	0	0	0	0	0
Otu387145	0	0	5.24274e-05	0	0	0	0	0	0	0	0	0	0	0	0	0	0	0	0	0	0	0	0	0	0	0	0	0	0	0	0	0	0	0	0	0	0	0	0	0	0	0	0	0	0	0	0	0	0
Otu39555	0	0	4.76613e-06	0	0	0	0	0	0	0	0	0	0	0	0	0	0	0	0	0	0	0	0	0	0	0	0	0	0	0	0	0	0	0	0	0	0	0	0	0.00020074	0	0	0	0	0	0	0	0	0
Otu40161	0	0	0	4.64074e-06	0	0	0	0	0	4.73115e-06	1.4659e-05	0	4.62366e-06	0	0	0	0	0	0	0	0	0	0	0	0	9.34693e-06	0	0	0	0	4.96542e-06	0	0	4.7357e-06	0	0	0	0	0	0	0	0	0	0	0	0	0	4.66057e-06	0
Otu40305	0	4.84069e-06	0	4.64074e-06	4.79543e-06	4.98137e-06	0	9.24492e-06	0	0	0	6.50266e-05	0	0	0	0	0	5.0804e-06	0	0	0	0	0	0	0	0	0	0	0	0	0	0	0	0	5.08585e-06	0	0	0	0	4.77952e-06	0	0	0	0	0	0	0	0	0
Otu40647	0	0	1.42984e-05	0	0	0	0	0	0	0	0	0	0	0	0	0	0	0	0	0	0	0	0	0	0	0	0	0	0	0	5.46196e-05	0	0	4.7357e-06	0	0	0	0	0	9.55904e-06	0	0	0	0	0	0	0	0	0
Otu416412	0	0	0	0	0	0	0	0	0	0	0	0	0	7.39888e-05	0	0	0	0	0	0	0	0	0	0	0	0	0	0	0	0	0	0	0	0	0	0	0	0	0	0	0	0	0	0	0	0	0	0	0
Otu41925	0	1.45221e-05	2.38306e-05	9.28147e-06	0	4.98137e-06	5.9522e-06	1.38674e-05	2.33171e-05	0	0	0	0	0	0	0	0	1.01608e-05	0	0	0	0	0	1.02203e-05	0	0	0	0	0	0	0	0	0	9.4714e-06	1.01717e-05	0.000236485	1.51586e-05	4.96231e-06	0	0	0	0	4.84623e-06	0	0	0	0	0	0
Otu419424	0	0	0	9.28147e-06	0	0	0	0	0	0	0	0	0	0	0	0	0	0	0	0	0	0	0	0	0	0	0	0	0	0	0	0	0	0	0	0	0	0	0	0	0	0	0	0	0	0	0	0	0
Otu42164	0	0	0	9.28147e-06	0	0	5.9522e-06	0	9.79318e-05	1.89246e-05	0	4.3351e-06	0	0	0	0	1.38322e-05	0	0	0	0	0	0	0	0	0	0	0	0	0	0	0	0	4.7357e-06	2.54292e-05	0	0	0	0	0	4.99775e-06	0	0	0	0	0	0	0	0
Otu427999	0	0	0	0	0	0	0	0	0	0	0	0.000108378	0	0	0	0	0	0	0	0	0	0	0	0	0	0	0	0	0	0	0	0	0	0	0	0	0	0	0	0	0	0	0	0	0	0	0	0	0
Otu430518	0	0	0	0	0	0	0	0	0	0	0	0	0	0	0	0	0	0	0	0	0	0	0	0	5.67964e-05	0	0	0	0	0	0	0	0	0	0	0	0	0	0	0	0	0	0	0	0	0	0	0	0
Otu433697	6.48451e-05	0	0	0	0	0	0	0	0	0	0	4.3351e-06	0	0	0	0	0	0	0	0	0	0	0	0	0	0	0	0	0	0	0	0	0	0	0	0	0	0	0	0	0	0	0	0	0	0	0	0	0
Otu442743	0	0	0	0	0	0	0	0	0	0	0	0	0	0	0	0	0	0	0	0	0	0	0	0	0	0	0	0	0	0	0	0	0	0	0	0	0	0	0	0	0	5.948e-05	0	0	0	0	0	0	0
Otu442845	0.000365912	0	0	0	0	0	0	0	0	0	0	0	0	0	0	0	1.38322e-05	0	0	0	0	0	0	0	0	0	0	0	0	0	0	0	0	0	0	0	0	0	0	0	0	0	0	0	0	0	0	0	0
Otu456663	0	0	0	0	0.000105499	0	0	0	0	0	0	0	0	0	0	0	0	0	0	0	0	0	0	0	0	0	0	0	0	0	0	0	0	0	0	0	0	0	0	0	0	0	0	0	0	0	0	0	0
Otu456669	0	0	0	0	0	0	0	0	0	0	0	0	0	0	0	0	0	0	0	0	0	0	0	0	0	0	0	0	0	0	0	0	0	0	0	0	0	5.95477e-05	0	0	0	0	0	0	0	0	0	0	0
Otu464748	0	0	0	0	0	0	0	0	0	0	0	0	0	0	0	0	5.53286e-05	0	0	0	0	0	0	0	0	0	0	0	0	0	0	0	0	0	0	0	0	0	0	0	0	0	0	0	0	0	0	0	0
Otu464749	0	0	0	0	0	0	5.35698e-05	0	0	0	0	0	0	0	0	0	0	0	0	0	0	0	0	0	0	0	0	0	0	0	0	0	0	0	0	0	0	0	0	0	0	0	0	0	0	0	0	0	0
Otu476950	0	0	0	0	0	0	0	0	0	0	0	0	0	0	0	0	0	0	0	0	0	0	0	0	0	0	0	0	0	0	0	0	0	0	6.6116e-05	0	0	0	0	0	0	0	0	0	0	0	0	0	0
Otu478794	0	0	4.76613e-06	0	0	9.96274e-06	0	0	0	0	0	0	0	0	0	0	0	0	0	0	0	0	0	0	0	0	0	0	0	0	0	0	0	0.000123128	1.52575e-05	0	0	0	0	0	0	0	0	0	0	0	0	0	0
Otu481309	0	0	0	0.000167067	0	0	0	0	0	0	0	0	0	0	0	0	0	0	0	0	0	0	0	0	0	0	0	0	0	0	0	0	0	0	0	0	0	0	0	0	0	0	0	0	0	0	0	0	0
Otu481312	0	0	0	0	0	0	0	0	0	0	0	0	0	0	0	0	0	0	0	0	0	0	0	0	0	0	0	0	0	0	0	0	0	0	0	0	0	0	0	0	0	0	0	0	0	0	0	0	0
Otu481315	0	0	0	0	0	0	0	0	0	0	0	0	0	0	0	0	0	0	0	0	0	0	0	0	0	0	0	0	0	0	0	0	0	0	0	0	0	0	0	0	5.49753e-05	0	0	0	0	0	0	0	0
Otu482782	0	0	0	0	0	0	0	0	0	0	0	0	0	0	0	0	0	0	0	0	0	0	0	0	0	0	0	0	0	0	0	0	0	0	0	0	0	0	0	6.21338e-05	0	4.57538e-06	0	0	0	0	0	0	0
Otu49159	0	0	0	0	0	0	0	0	0	0	4.88632e-06	0	0	0	0	4.45458e-06	0	0	0	0	0	0	0	0	0	0	0	0	0	0	0	0	0	0	0	0	0	0	0	0	0	0	0	0	0	0	0	0	0
Otu49656	0	0	0	0	0	0	0	9.24492e-06	0	0	0	0	0	2.77458e-05	0	0	0	5.0804e-06	0	0	0	0	0	0	0	0	0	0	0	0	0	0	0	4.7357e-06	0	0	0	0.000357286	0	0	0	0	0	0	0	0	0	0	0
Otu497753	0	0	0	0	0	0	0	0	0	0	0	0	0	0	0	0	0	0	0	0	0	0	8.38149e-05	0	0	0	0	0	0	0	0	0	0	0	0	0	0	0	0	0	0	0	0	0	0	0	0	0	0
Otu500306	0	0	0	0	0	0	0	0	0	0	0	0	0	0	0	0	0	0	0	0	0	0	0	0	0	0	0	0	0	0	0	0	0	0	0	0	0	6.451e-05	0	0	0	0	0	0	0	0	0	0	0
Otu50074	0	0	9.53225e-06	4.64074e-06	4.79543e-06	0	0	0	0	0	0	0	0	0	0	0	0	4.06432e-05	0	0	0	0	0	1.02203e-05	0	0	0	0	0	0	0	0	0	1.89428e-05	1.52575e-05	4.54779e-06	0.000111163	9.92462e-06	0	2.38976e-05	0	0	0	0	0	0	0	0	0
Otu50091	4.6318e-06	0	4.76613e-06	1.85629e-05	0	1.49441e-05	0	5.54695e-05	1.39903e-05	0	0	0	0	1.84972e-05	4.42229e-06	0	0	2.5402e-05	0	0	5.05094e-06	0	0	5.11015e-06	0	0	0	0	0	0	0	0	0	0	0.000162747	2.2739e-05	0	0	0	0	0	0	0	0	0	0	0	0	0
Otu50230	0	0	0	0	0	0	0	0	0	0	0	0	0	0	0	0	0	0	0	0	0	0	0	0	0	0	0	0	0	0	0	0	0	0	0	4.54779e-06	0.000111163	0	5.06894e-06	0	0	0	0	0	0	0	0	0	0
Otu503706	0	0	0	0	0	0	0	0	0	0	0	0	0	0	0	0	0	0	0	0	0	0	0	0	0	0	0	0	0	0	0	0	0	0	0	0	0	0	0	0	0	0	0	0	0	0	0	0	0
Otu505027	0	0	0	0	0	8.46833e-05	0	0	0	0	0	0	0	0	0	0	0	0	0	0	0	0	0	0	0	0	0	0	0	0	0	0	0	0	0	0	0	0	0	0	0	0	0	0	0	0	0	0	0
Otu511336	0	9.68139e-05	0	0	0	0	0	0	0	0	0	0	0	0	0	0	0	0	0	0	0	0	0	0	0	0	0	0	0	0	0	0	0	0	0	0	0	0	0	0	0	0	0	0	0	0	0	0	0
Otu512963	0	0	0	0	0	0.00010959	0	0	0	0	0	0	0	0	0	0	0	0	0	0	0	0	0	0	0	0	0	0	0	0	0	0	0	0	0	0	0	0	0	0	0	0	0	0	0	0	0	0	0
Otu513890	0	0	0	0	0	0	0	0	0	0	0	0	0	0	0	0	0	0	0	0	0	0	0	0	0	0	0	0	0	0	0	0	0	0	0	0	0.000111163	0	0	0	0	0	0	0	0	0	0	0	0
Otu515125	0	0.000106495	0	0	0	0	0	0	0	0	0	0	0	0	0	0	0	0	0	0	0	0	0	0	0	0	0	0	0	0	0	0	0	0	0	0	0	0	0	0	0	0	0	0	0	0	0	0	0
Otu515127	0	0	0	0	0	0	0	0	6.06244e-05	0	0	0	0	0	0	0	0	0	0	0	0	0	0	0	0	0	0	0	0	0	0	0	0	0	0	0	0	0	0	0	0	0	0	0	0	0	0	0	0
Otu516130	0	0	0	0	0	0	0	0	0	0	0	0	0	0	0	0	0	0	0	0	0	0	0	0	0	0	0	0	0	0	0	0	0	0	0	0	0	0	0	0	0	0	0	0	0	0	0	0	9.49979e-05
Otu516131	0	8.22918e-05	0	0	0	0	0	0	0	0	0	0	0	0	0	0	0	0	0	0	0	0	0	0	0	0	0	0	0	0	0	0	0	0	0	0	0	0	0	0	0	0	0	0	0	0	0	0	0
Otu516134	0	0	0	0	0	0	0	0	0	0	0	0	0	0	0	0	0	0	0	0	0	0	0	0	0	0	0	0	0	0	0	0	0	0	0	0	0	0	0	0	0	0	0	0	0	0	0	0	0
Otu517011	0	0	0.000362226	0	0	0	0	0	0	0	0	0	0	0	0	0	0	0	0	0	0	0	0	0	0	0	0	0	0	0	0	0	0	0	0	0	0	0	0	0	0	0	0	0	0	0	0	0	0
Otu517014	0	0	0	0	0	0	0	0	0	0	0	0	0	0	0	0	0	0	0	0	0	0	0	0	0	0	0	0	0	0	0	0	0	0	0	0	0	0	0	0	0	0	0	0	0	0	0	0	0
Otu517666	0	0	0	0	0	0	0	0	0.000256488	0	0	0	0	0	0	0	0	0	0	0	0	0	0	0	0	0	0	0	0	0	0	0	0	0	0	0	0	0	0	0	0	0	0	0	0	0	0	0	0
Otu518950	0	0	0	0	0	0	0	0.000221878	0	0	0	0	0	0	0	0	0	0	0	0	0	0	0	0	0	0	0	0	0	0	0	0	0	0	0	0	0	0	0	0	0	0	0	0	0	0	0	0	0
Otu519525	0	0	0	0	0	0	0	0	0.000475669	0	0	0	0	0	0	0	0	0	0	0	0	0	0	0	0	0	0	0	0	0	0	0	0	0	0	0	0	0	0	0	0	0	0	0	0	0	0	0	0
Otu519526	0	0.000435662	0	0	0	0	0	0	0	0	0	0	0	0	0	0	0	0	0	0	0	0	0	0	0	0	0	0	0	0	0	0	0	0	0	0	0	0	0	0	0	0	0	0	0	0	0	0	0
Otu519532	0	0	0	0	0	0	0	0	0	0	0	0	0	0	0	0	0	0	0	0	0	0	0	0	0	0	0	0	0	0	0	0	0	0	0	0	0	0.000233229	0	0	0	0	0	0	0	0	0	0	0
Otu519539	0	0	0	0	0	0	0	0	0	0	0	0	0	0	0	0	0	0	0	0	0	0	0	0	0	0	0	0	0	0	0	0	0	0	0	0	0	0	0	0	0	0	0	0	0	0	0	0	0
Otu519543	0	0	0	0	0	0	0	0	0	0	0	0	0	0	0	0	0	0	0	0	0	0	0	0	0	0	0	0	0	0	0	0	0	0	0	0	0	0	0	0	0	0	0	0	0	0	0	0	0
Otu519547	0	0	0	0	0	0	0	0	0	0	0	0	0	0	7.96013e-05	0	0	0	0	0	0	0	0	0	0	0	0	0	0	0	0	0	0	0	0	0	0	0	0	0	0	0	0	0	0	0	0	0	0
Otu520634	0	0	0	0	0	0	0	0	0.000303122	0	0	0	0	0	0	0	0	0	0	0	0	0	0	0	0	0	0	0	0	0	0	0	0	0	0	0	0	0	0	0	0	0	0	0	0	0	0	0	0
Otu520642	0	0	0	0	0	0	0	0	0	0	0	0	0	0	0	0	0	0	0	0	0	0	0	0	5.67964e-05	0	0	0	0	0	0	0	0	0	0	0	0	0	0	0	0	0	0	0	0	0	0	0	0
Otu521149	0	0	0	0	0	0	0	0	0	0	0	0	0	0	0	0	0	0	0	0	0	0	0	0	0	0	0	0	0	0	0	0	0	0	0	0	0	0	0	0	0	0	0	0	0	0	0	0	0
Otu521610	0	0	0	0	0	0	0	0	0	0	0	0	0	0	0	0	0	0	0	0	0	0	0	0	0	0	0	0	0	0	0	0	0	0	0	0.000386562	0	0	0	0	0	0	0	0	0	0	0	0	0
Otu521611	0	0	0	0	0	0	0	0	0	0	0	0	0	0	0	0	0	0	0	0	0	0	0	0	0	0	0	0	0	0	0	0	0	0	0	0	0	0	0	0	0	0	0	0	0	0	0	0	0
Otu521612	0	0.000304964	0	0	0	0	0	0	0	0	0	0	0	0	0	0	0	0	0	0	0	0	0	0	0	0	0	0	0	0	0	0	0	0	0	0	0	0	0	0	0	0	0	0	0	0	0	0	0
Otu522102	0	0	0	0	0	0	0	0	0	0	0	0	0	0	0	0	0	0	0	0	0	0	0	0	0	0	0	0	0	0	0	0	0	0	0.000335666	0	0	0	0	0	0	0	0	0	0	0	0	0	0
Otu522531	0	0	0	0	0	0	0	0	0	5.67738e-05	0	0	0	0	0	0	0	0	0	0	0	0	0	0	0	0	0	0	0	0	0	0	0	0	0	0	0	0	0	0	0	0	0	0	0	0	0	0	0
Otu523469	0	0	0	0	0	0	0	0	0	0	0	0	0	0	0	0	0	0	0	0	0	0	0	0	0	0	0	0	0	0	0	0	0	0	0	0	0.00045981	0	0	0	0	0	0	0	0	0	0	0	0
Otu53589	4.6318e-06	0	0	9.28147e-06	0	0	0	0	4.66342e-06	4.25804e-05	0	8.67021e-06	0	4.6243e-06	1.76892e-05	0	0	0	4.333e-06	0	0	4.5788e-06	0	0	0.000165656	0	0	0	0	0	0	0	0	0	0	4.54779e-06	5.05285e-06	0	0	0	9.9955e-06	0	0	0	4.48358e-06	6.03394e-05	0	0	0
Otu54089	9.26359e-06	4.84069e-06	2.38306e-05	0	4.79543e-06	4.98137e-06	0	4.62246e-06	3.73073e-05	0	0	0	0	9.2486e-06	0	0	0	1.01608e-05	0	0	0	0	0	0	0	0	0	0	0	0	0	0	0	0	0.000518757	0	0	0	0	0	0	0	0	0	0	0	0	0	0
Otu55717	0	0	0	0	4.79543e-06	0	0	0	1.39903e-05	4.73115e-06	0	4.3351e-06	0	0	0	0	0	0	0	0	0	0	0	0	4.73303e-06	0	0	0	0	0	0	0	0	4.7357e-06	0	0	0	0	1.52068e-05	9.55904e-06	0	0	0	0	0	0	0	0	0
Otu56562	0	0	0	0	0	0	0	4.62246e-06	6.99513e-05	0	0	0	0	0	0	0	0	5.0804e-06	0	0	0	0	0	0	0	0	0	0	0	0	0	0	0	0	0	0	0	0	0	0	0	0	0	0	0	0	0	0	0
Otu57079	4.6318e-06	0	0	0	0	6.97392e-05	0	4.62246e-06	9.32684e-06	0	0	0	4.62366e-06	0	4.42229e-06	0	0	0	0	0	0	0	0	0	4.73303e-06	0	0	0	0	0	0	0	0	0	5.08585e-06	0	0	0	0	0	0	0	0	0	0	0	0	0	0
Otu57308	1.38954e-05	0.000121017	2.85968e-05	4.64074e-06	4.79543e-06	0	0	0	0	2.36558e-05	0	4.3351e-06	0	0	0	0	0	0	0	0	0	0	0	0	0	0	0	0	0	0	0	0	0	0	0	0	1.01057e-05	0	0	4.77952e-06	0	4.57538e-06	0	0	0	0	0	0	0
Otu57482	4.6318e-06	0	0	0	0	0	0	0	0	0	0	0	0	0	0	0	0	0	0	0	0	0	0	0	0	0	0	0	0	0	0	0	0	0	0	0	0	0.000104209	0	0	0	4.57538e-06	0	0	0	0	0	0	0
Otu58260	0	0	0	0	0	0	0	0	0	0	0	4.3351e-06	0	0	0	0	0	0	0	0	0	0	0	0	0	0	0	0	0	0	0	0	0	0	0	0	0	0	0	0.000224637	0	0	0	0	0	0	0	0	0
Otu58721	4.6318e-06	4.84069e-06	0	4.64074e-06	4.79543e-06	0	0	0	6.52878e-05	0	0	0	0	0	0	0	0	0	0	0	0	0	0	0	0	0	0	0	0	0	0	0	0	0	5.08585e-06	4.54779e-06	1.01057e-05	1.48869e-05	0	0	0	0	0	0	0	0	0	0	0
Otu59057	0	4.84069e-06	0	0	0	1.99255e-05	0	0	9.32684e-06	0	0	0	0	0	0	0	0	5.0804e-06	0	0	0	0	0	0	0	0	0	0	0	0	0	0	0	0	0	1.81912e-05	0	0.000133982	0	0	0	0	0	0	0	0	0	0	0
Otu59445	0.000143586	0	0	0	0	0	0	0	0	0	0	0	0	0	0	0	0	0	0	0	0	0	0	0	0	0	0	0	0	0	0	0	0	0	0	4.54779e-06	0	0	0	0	0	0	0	0	0	0	0	0	0
Otu59456	1.38954e-05	4.84069e-06	1.42984e-05	0	4.79543e-06	0	0	0	4.66342e-06	0	0	4.3351e-06	0	0	4.42229e-06	0	0	0	0	0	0	0	0	0	0	0	0	0	0	0	0	0	0	0	5.08585e-06	5.00257e-05	5.05285e-06	9.92462e-06	0	4.77952e-06	4.99775e-06	9.15076e-06	0	0	0	0	0	0	4.74989e-06
Otu59727	0	0	0	4.64074e-06	0	0	0	0	0	0	0	0	0	0	0	0	0	0	0	0	0	0	0	0	0	0	0	0	0	0	0	0	0	0	0	0	0	0	0	0	0	0	0	0	0	8.04525e-05	0	0	0
Otu59804	0	0	4.76613e-06	0	0	0	0	0	0	0	0	4.3351e-06	0	0	0	0	0	0	0	0	0	0	0	0	0	0	0	0	0	0	0	0	0	0	0	4.54779e-06	0.000313277	0	0	1.43386e-05	0	0	0	0	0	0	0	0	0
Otu60999	0	1.45221e-05	4.76613e-06	0	4.79543e-06	9.96274e-06	0	2.31123e-05	9.32684e-06	4.73115e-06	0	4.3351e-06	4.62366e-06	0	0	0	0	0	0	0	0	0	4.93029e-06	0	0	0	0	0	0	0	0	0	0	8.05069e-05	0	4.54779e-06	3.03171e-05	0	0	4.77952e-06	0	0	0	0	0	0	0	0	0
Otu61000	0	4.84069e-06	0	0	0	0	5.9522e-06	0	0	0	0	0	0	0	0	0	0	0	0	0	0	0	0	0	0	0	0	0	0	0	0	0	0	0	0	0.000263772	0	0	0	0	0	0	0	0	0	0	0	0	0
Otu61201	0	0	0.000200177	0	0	0	0	0	0	0	0	0	0	0	0	0	0	0	0	0	0	0	0	0	0	0	0	0	0	0	0	0	0	0	0	0	0	0	0	0	0	0	0	0	0	0	0	0	0
Otu61872	1.38954e-05	0	0	0	4.79543e-06	0	3.57132e-05	1.38674e-05	2.79805e-05	0	0	0	0	4.6243e-06	0	0	0	1.52412e-05	0	0	0	0	0	0	0	0	0	0	0	0	0	0	0	1.42071e-05	0.00231915	4.54779e-06	1.01057e-05	2.48116e-05	0	1.43386e-05	0	9.15076e-06	0	0	1.34507e-05	0	0	0	0
Otu62037	9.26359e-06	9.68139e-06	9.53225e-06	9.28147e-06	4.79543e-06	9.96274e-06	0	0	0	0	0	0	0	0	0	0	0	5.0804e-06	0	0	0	0	0	1.02203e-05	0	0	0	0	0	0	0	0	0	0	1.52575e-05	2.72867e-05	0	5.45854e-05	0	0	4.99775e-06	0	0	0	0	0	0	0	0
Otu62280	0	0	0	0	0	4.98137e-06	5.9522e-06	1.38674e-05	1.86537e-05	0	0	0	0	0	0	0	0	7.6206e-05	0	0	0	0	0	0	0	0	0	0	0	0	4.96542e-06	0	0	0	4.57726e-05	4.54779e-05	5.05285e-06	4.96231e-06	0	0	0	0	4.84623e-06	0	0	0	0	4.66057e-06	0
Otu62612	0	4.84069e-06	4.76613e-06	0	0	0	0	1.84898e-05	4.66342e-06	0	0	4.3351e-06	0	0	0	0	0	5.0804e-06	0	0	0	0	0	5.11015e-06	0	0	0	0	0	0	0	0	0	0	5.08585e-06	0	2.52643e-05	5.95477e-05	0	4.77952e-06	0	0	0	0	0	0	0	0	0
Otu63557	0	0	0	9.28147e-06	0	4.98137e-06	0	0	0	1.89246e-05	9.77264e-06	8.67021e-06	0	9.2486e-06	0	0	0	0	8.666e-05	6.67518e-05	0	0	0	5.11015e-06	0	0	4.47852e-06	0	0	0	0	0	0	9.4714e-06	0	0	0	0	0	0	0	9.15076e-06	0	0	4.48358e-06	0	4.79614e-06	0	0
Otu64010	0	0	0	0	0	0	0	0	0	0	0	0	0	0	0	0	0	0	0	0	0	0	0	0	0	0	0	0	0	0	0	0	0	5.68284e-05	0	0	5.05285e-06	0	0	0	0	0	0	0	0	0	0	0	0
Otu64351	4.6318e-06	4.84069e-06	9.53225e-06	4.64074e-06	0	1.49441e-05	0	1.84898e-05	4.66342e-05	0	0	0	4.62366e-06	4.6243e-06	4.42229e-06	0	0	5.58844e-05	4.333e-06	0	0	0	0	5.11015e-06	0	0	0	0	0	0	5.9585e-05	0	0	0	1.52575e-05	4.09301e-05	5.05285e-06	0	0	9.55904e-06	0	9.15076e-06	0	0	0	5.02828e-06	0	0	0
Otu64378	3.70544e-05	2.42035e-05	5.24274e-05	2.78444e-05	1.43863e-05	4.98137e-06	0	4.16021e-05	3.26439e-05	4.73115e-06	4.88632e-06	0	0	4.6243e-06	8.84459e-06	0	0	1.52412e-05	0	0	0	4.5788e-06	0	0	0	0	0	0	4.95742e-06	0	0	0	0	1.42071e-05	4.57726e-05	3.63823e-05	2.52643e-05	5.45854e-05	5.06894e-06	4.77952e-06	0	4.57538e-06	4.84623e-06	0	0	1.00566e-05	0	4.66057e-06	0
Otu64397	1.85272e-05	9.68139e-06	0	6.96111e-05	0	0	0	4.62246e-05	9.32684e-06	6.1505e-05	0	4.3351e-06	0	4.6243e-06	0	0	0	5.0804e-06	0	4.45012e-06	0	9.15759e-06	0	0	0	4.67347e-06	0	0	0	0	0	0	0	9.4714e-06	0	0	0	4.96231e-06	0	0	2.99865e-05	0	0	0	0	1.00566e-05	4.79614e-06	0	4.74989e-06
Otu64488	5.09497e-05	3.87255e-05	9.53225e-06	4.64074e-06	3.3568e-05	1.99255e-05	0	4.16021e-05	4.19708e-05	4.73115e-06	4.88632e-06	8.67021e-06	0	0	4.42229e-06	0	0	5.0804e-06	0	0	0	0	0	1.02203e-05	0	0	0	0	0	0	0	0	4.74172e-06	4.7357e-06	1.01717e-05	4.54779e-05	0.00010611	9.92462e-06	0	1.43386e-05	0	0	0	0	4.48358e-06	0	4.79614e-06	0	0
Otu64512	1.38954e-05	0	0	2.78444e-05	0	0	0	0	9.32684e-06	7.09673e-05	0	4.3351e-06	0	0	0	0	0	5.0804e-06	0	0	0	0	0	5.11015e-06	0	0	0	0	0	0	0	0	0	4.7357e-06	0	0	0	4.96231e-06	2.53447e-05	0	0	0	0	0	0	0	0	0	0
Otu64585	0	0	0	4.64074e-06	0	0	0	0	4.66342e-06	6.62361e-05	1.4659e-05	8.67021e-06	0	9.2486e-06	0	8.90916e-06	0	0	4.333e-06	0	5.05094e-06	1.83152e-05	0	0	1.41991e-05	0	1.34356e-05	0	0	0	0	0	0	0	0	0	0	4.96231e-06	5.06894e-06	0	1.9991e-05	3.20277e-05	4.84623e-06	0	1.34507e-05	1.00566e-05	1.91846e-05	0	0
Otu64709	4.6318e-06	4.84069e-05	2.38306e-05	4.64074e-06	4.79543e-05	4.98137e-06	5.9522e-06	4.62246e-05	0.000214517	8.04296e-05	0	0	0	0	8.84459e-06	0	0	0	1.7332e-05	0	0	0	0	0	0	0	0	0	0	0	0	0	0	2.36785e-05	2.03434e-05	1.81912e-05	1.51586e-05	1.98492e-05	0	9.55904e-06	0	0	4.84623e-06	0	0	0	4.79614e-06	0	0
Otu64716	0	4.84069e-06	4.76613e-06	4.64074e-06	0	0	0	0	0	9.4623e-06	0	4.3351e-06	0	0	0	0	1.38322e-05	0	0	0	0	0	0	0	0	0	0	0	0	0	0	0	0	0	0	0	0	0	0	0	0	0.000393483	0	0	0	0	0	0	0
Otu64915	9.26359e-06	4.84069e-06	0	0	4.79543e-06	2.49068e-05	0	9.24492e-06	0	0	0	0	0	0	0	0	0	0	0	0	0	0	0	9.19827e-05	0	0	0	0	0	0	0	0	0	0	0	0	0	0	0	0	0	0	0	0	0	0	0	0	0
Otu65100	9.26359e-06	0	0	9.28147e-06	4.79543e-06	0	0	0	0	5.20427e-05	0	0	0	1.84972e-05	1.76892e-05	0	0	0	0	0	5.05094e-06	4.5788e-06	0	0	4.73303e-06	4.67347e-06	0	0	0	0	0	0	0	4.7357e-06	0	0	0	0	0	2.86771e-05	0	0	4.84623e-06	0	0	5.02828e-06	1.91846e-05	4.66057e-06	0
Otu658	0	0	0	0	0	0	0	0	4.66342e-06	0	0	0	4.62366e-06	0	0	0	0	0	0	0	0	0	0	0	0	0	0	0	0	0	0	0	0	0	0	0.000313798	0	0	0	0	0	0	0	0	0	0	0	0	0
Otu65996	1.38954e-05	1.45221e-05	4.28951e-05	0	4.31588e-05	2.49068e-05	0	1.38674e-05	4.66342e-06	0	0	2.16755e-05	0	0	0	0	0	0	0	0	0	0	0	0	4.73303e-06	0	0	0	0	0	9.93083e-06	0	0	2.36785e-05	5.08585e-06	3.63823e-05	5.05285e-06	0.00012902	0	0	0	0	0	0	0	0	0	0	0
Otu66002	4.6318e-06	9.68139e-06	0	9.28147e-06	0	0	0	0	0	5.67738e-05	9.77264e-06	4.3351e-06	0	1.38729e-05	0	8.90916e-06	0	0	8.666e-06	8.90024e-06	0	2.2894e-05	0	0	0	1.40204e-05	4.47852e-06	0	0	0	0	0	0	0	0	0	0	4.96231e-06	0	0	0	4.57538e-06	0	0	4.48358e-06	0	0	0	0
Otu66020	0	0	4.76613e-06	4.64074e-06	0	0	0	0	4.66342e-06	1.41935e-05	4.88632e-06	0	4.62366e-06	0	0	0	0	5.0804e-06	5.6329e-05	4.45012e-06	0	0	0	0	0	0	0	0	0	0	0	0	0	0	0	0	0	0	0	9.55904e-06	0	0	4.84623e-06	0	0	5.02828e-06	4.79614e-06	0	0
Otu66076	9.26359e-06	0	0	0	0	8.96647e-05	0	0	4.66342e-06	0	0	0	0	0	8.84459e-06	0	0	0	0	0	0	0	0	0	0	0	0	0	0	0	0	0	0	0	2.03434e-05	1.81912e-05	5.05285e-06	4.96231e-06	0	0	0	0	0	0	0	0	0	0	0
Otu66193	1.38954e-05	7.26104e-05	3.8129e-05	0	4.79543e-06	4.98137e-06	0	1.84898e-05	1.86537e-05	0	4.88632e-06	0	0	4.6243e-06	4.42229e-06	0	0	1.52412e-05	0	0	0	4.5788e-06	0	1.53304e-05	0	0	0	0	0	0	0	0	0	0	0	1.36434e-05	5.05285e-06	1.48869e-05	0	0.000363244	0	9.15076e-06	0	0	0	0	4.79614e-06	0	0
Otu66303	0	0	4.76613e-06	0	0	0	0	0	0	0	0	0	0	0	0	0	0	0	0	0	0	0	4.93029e-06	0	0	0	0	0	0	0	0	0	0	0	0	0	0	0	0	0	0	0	0	0	0	0	0	0	0
Otu66321	1.38954e-05	4.84069e-06	4.76613e-06	4.64074e-06	9.59085e-06	4.98137e-06	0	9.24492e-06	4.66342e-06	0	0	0	0	0	0	0	0	5.58844e-05	0	0	0	0	0	0	0	0	0	0	0	0	0	0	0	0	5.08585e-06	3.63823e-05	5.05285e-06	0	0	0	0	0	0	0	0	0	0	0	0
Otu67684	0	0	0	0	0	9.96274e-06	0	9.24492e-06	1.39903e-05	0	0	0	0	9.2486e-06	0	0	0	1.01608e-05	0	0	0	0	0	5.11015e-06	0	0	0	0	4.95742e-06	0	0	0	0	0	1.52575e-05	6.82169e-05	0	0	0	0	4.99775e-06	0	0	0	0	0	0	0	0
Otu68151	4.6318e-06	0	4.76613e-06	0	0	7.47205e-05	0	0	0	4.73115e-06	4.88632e-06	4.3351e-06	4.62366e-06	0	0	0	0	0	0	0	0	4.5788e-06	0	0	0	0	0	0	0	0	0	0	0	0	1.01717e-05	0	0	0	5.06894e-06	0	0	0.00023792	0	0	0	5.02828e-06	0	0	0
Otu7	0	0	9.53225e-06	9.28147e-06	0	4.98137e-06	0	0	0	0	0	0	0.00114667	0	0	0	0	0	0	0	0	1.37364e-05	0	0	0	0	0	0	0	0	0	0	0	0	0	0	0	0	0	0	0.0171673	0	0	0	0	0	0	0	0
[truncated: 1,345 more rows]
[truncated: 17 more columns]
